# Supplementary material
Source: Elsevier journal article supplement (https://www.sciencedirect.com/science/article/pii/S1699258X21002242)
Supplement: mmc1 [file S1699258X21002242:mmc1.pdf]

Material Suplementario

Guía de práctica clínica espondiloartritis axial  
(EspAax) ASOREUMA 2021

Contenido

Pregunta 1: ..... 2

Pregunta 2: ..... 25

Pregunta 3: ..... 45

Pregunta 4: ..... 61

Pregunta 5: ..... 80

Pregunta 6: ..... 95

Pregunta 7: ..... 124

Pregunta 8: ..... 150

Pregunta 9: ..... 171

Pregunta 10: ..... 189

Pregunta 11: ..... 232

Votaciones de las recomendaciones para la GPC de EspAax: ..... 248

Referencias: ..... 253

## Pregunta 1:

¿Cuál es la utilidad (características operativas de la prueba\*) de las escalas de tamizaje (1- Algoritmo de Berlín 2- criterios de ASAS de dolor lumbar inflamatorio- "Ankylosing Spondylitis Assessment of Spondyloarthritis international society 3- criterios de Calín) en la detección de pacientes adultos con Espondiloartritis Axial y dolor lumbar?

|              |                                                         |
|--------------|---------------------------------------------------------|
| Población    | Pacientes con dolor inflamatorio de columna             |
| Intervención | Algoritmo de Berlín, criterios ASAS, Criterios de Calín |
| Comparación  | Algoritmo de Berlín, criterios ASAS, Criterios de Calín |
| Desenlaces   | Diagnóstico de espondiloartritis axial                  |

## Antecedentes

La espondiloartritis axial tiene un espectro que va desde la espondiloartritis no evidente en la radiografía hasta la espondilitis anquilosante, con cambios radiográficos establecidos. En todo el continuo de la enfermedad, el dolor lumbar inflamatorio está presente y es frecuente al inicio de la enfermedad, por lo que es un síntoma clínico clave en el diagnóstico semiológico de la espondiloartritis axial. El dolor lumbar inflamatorio, típico de esta entidad se caracteriza por un inicio insidioso, rigidez matutina en la parte baja de la espalda, despertares en la noche o temprano en la mañana a causa del dolor, dolor en glúteo alternante entre otros síntomas. Característicamente, el dolor mejora con el ejercicio, pero no con el reposo. La definición de la presencia de dolor lumbar inflamatorio determina en gran medida la remisión a reumatología; en la actualidad, se dispone de varios criterios que ayudan al clínico a definir el dolor lumbar inflamatorio dentro de los que se encuentran: los criterios de Calín (1) EspAax, los criterios de Berlín(2) y los criterios ASAS (Assessment of SpondyloArthritis international Society) (3) . Estos criterios han sido estudiados para definir sus características operativas en el diagnóstico temprano de la enfermedad.

Esta pregunta busca establecer cuál de ellos presenta mejor desempeño en el diagnóstico temprano de la EspAax.

## Resumen de la evidencia

La búsqueda de la evidencia no identificó revisiones sistemáticas que evaluaran en forma comparativa la precisión diagnóstica de las pruebas diagnósticas que compararan las características operativas de las escalas de tamizaje Calín, Berlín y ASAS.

Se identificaron tres estudios independientes que han evaluado comparativamente algunas de estas pruebas de tamizaje. El estudio DIVERS(4) que evaluó algoritmo de Berlín, criterios de ASAS de dolor

lumbar inflamatorio y los criterios de Calín en comparación con el diagnóstico por médico especialista; el estudio de Arnbak 2016 (5) que evaluó algoritmo de Berlín, criterios de ASAS de dolor lumbar inflamatorio y los criterios de Calín en comparación con los criterios ASAS de Espondiloartritis y el estudio de Solmaz (6).

## Precisión diagnóstica

Algoritmo de Berlín, criterios de ASAS de dolor lumbar inflamatorio y criterios de Calín en comparación con el diagnóstico por médico especialista

El estudio DIVERS (Diagnostic Accuracy of Inflammatory Back pain study) (4) publicado en 2018, fue un estudio de vida real conducido en 6 centros de reumatología en Alemania, que incluyó 460 pacientes con dolor de espalda crónico de 3 o más meses de evolución y edad de inicio del dolor menor a 45 años y diagnóstico no claro. Tuvo como objetivos comparar el desempeño de las pruebas cuestionario de Calín, algoritmo de Berlín y criterios ASAS de dolor lumbar con el del diagnóstico clínico realizado por expertos, el cual se consideró el estándar de referencia para el diagnóstico temprano de pacientes con EspAax. Se estima que la prevalencia de EspAax en esta población sería del 5% (reportada por los autores). El cuestionario de Calín, los criterios de Berlín y los criterios de dolor lumbar ASA fueron aplicados a todos los pacientes en centros de cuidado primario, los pacientes fueron evaluados por un reumatólogo no cegado que realizaba el diagnóstico clínico (estándar de referencia) y se comparaba con la evaluación independiente realizada por un reumatólogo cegado con respecto a los cuestionarios. Se incluyeron 460 pacientes, la precisión diagnóstica del dolor inflamatorio de espalda para el reumatólogo cegado tuvo una sensibilidad de 74-81% y una especificidad del 25-44% discriminada como se presenta en la tabla 1. En general los criterios ASAS tuvieron la sensibilidad más baja comparado con los criterios de Berlín, pero mayor especificidad. La precisión diagnóstica de cada escala evaluada contra el patrón de referencia (diagnóstico clínico), se presenta en la tabla 1.

Tabla 1. Precisión diagnóstica

| Dolor lumbar inflamatorio según | Sensibilidad % (IC 95%) | Especificidad % (IC 95%) | LR + (IC %95)   | LR -(IC%95)    |
|---------------------------------|-------------------------|--------------------------|-----------------|----------------|
| Criterios de Calín              | 79.4 (73.5 - 85.4)      | 25.1 (19.6- 31.3)        | 1.1 (1.0-1.2)   | 0.8 (0.8- 1.2) |
| Criterios de Berlín             | 81.1 (75.4 - 86.8)      | 32.3 (26.2- 38.6)        | 1.2 (1.1 -1.3)  | 0.6 (0.4- 0.8) |
| Criterios ASAS                  | 74.4 (68.1- 80.8)       | 39.5 (33- 46.1)          | 1.2 (1.1 – 1.4) | 0.6 (0.5- 0.9) |

Tomada de Poddubnyy 2018 (4).

Algoritmo de Berlín, criterios de ASAS de dolor lumbar inflamatorio- "Ankylosing Spondylitis Assessment Study" y criterios de Calín en comparación con los criterios ASAS de Espondiloartritis

## GPC para pacientes con Espondiloartritis Axial ASOREUMA

Arnbak en 2016 (5) realizó el estudio de una cohorte en Dinamarca en la cual se incluyeron 759 pacientes de 18-40 años con dolor lumbar bajo de más de 3 meses de evolución, y que tuvieran al menos una característica de dolor lumbar inflamatorio. Se estimó una prevalencia de EPA en esta población fue de 0.5%. Las pruebas en evaluación fueron los criterios de Calín, Berlín y la definición ASAS de dolor lumbar en comparación con los criterios ASAS completos para espondiloartritis, como estándar de referencia que fueron aplicados a todos los pacientes independientemente de los resultados de las pruebas Calín, Berlín o ASAS de dolor lumbar.

Los pacientes diligenciaron de forma independiente los cuestionarios electrónicos de Calín, Berlín y definiciones ASAS de dolor lumbar. El valor discriminativo de las definiciones de dolor inflamatorio fue estimado a partir de la aplicación de los criterios ASAS de EA como patrón de referencia y se presentan en la tabla 2. Adicionalmente se encontró en los pacientes de la cohorte que el 99% (IC 95% [ 98, 100]) tuvieron al menos una característica de dolor lumbar inflamatorio.

**Tabla 2. Características operativas de las pruebas**

| Dolor lumbar               | Prevalencia | Sensibilidad | Especificidad | LR(+) | LR (-) |
|----------------------------|-------------|--------------|---------------|-------|--------|
| <b>Criterios de Calín</b>  | 52 (48-55)  | 64 (53-74)   | 50 (46-54)    | 1.28  | 0.72   |
| <b>Criterios de Berlín</b> | 42 (39-46)  | 59 (48-69)   | 60 (56-64)    | 1.48  | 0.68   |
| <b>Criterios ASA IBP</b>   | 23 (20-26)  | 35 (25-46)   | 79 (75-82)    | 1.67  | 0.82   |

*Tomada de Arnbak 2016 (5)*

**Algoritmo de Berlín, criterios de ASAS de dolor lumbar inflamatorio y criterios de Calín en sujetos con cambios radiográficos y no radiográficos de EPA**

El estudio de Solmaz (6) publicado en 2014, fue un estudio realizado en Turquía con el objetivo comparar el desempeño de las pruebas: criterios de Berlín y criterios ASAS de dolor lumbar inflamatorio, con los criterios de Calín para el diagnóstico temprano de pacientes con EspAax. Se estima que la prevalencia de EspAax en esta población sería del 1.05 (0.70-1.50) %. El estudio incluyó 274 pacientes con espondiloartritis axial y 50 pacientes con diagnóstico de dolor lumbar mecánico de más de 3 meses de evolución. Los 274 pacientes con espondiloartritis axial fueron clasificados en “EA con compromiso radiológico” si presentaban en la radiografía sacroileítis de acuerdo con los criterios de New York y en “EPA sin compromiso radiológico” si solo tenían evidencia de compromiso de sacro ilíacas por RNM no en la radiografía.

Una vez definido el compromiso radiológico, los cuestionarios de Calín y Berlín fueron aplicados a todos los pacientes por un mismo médico con el fin de evaluar su precisión en la identificación de EPA no radiológica. En este estudio (6), los criterios de Calín mostraron mejor sensibilidad y los

## GPC para pacientes con Espondiloartritis Axial ASOREUMA

criterios de Berlín mostraron mejor especificidad. Los criterios ASAS de dolor lumbar tuvieron un buen desempeño, pero no fueron superiores (tablas 3-5).

Tabla 3. Criterios de Calín para documentar espondilitis anquilosante con cambios radiográficos y no radiográficos

| Criterios de Calín   | Espondiloartritis radiológica (n=175) | Espondiloartritis No Radiológica (n=99) | Todos los pacientes (n=274) |
|----------------------|---------------------------------------|-----------------------------------------|-----------------------------|
| <b>Sensibilidad</b>  | 94%                                   | 85.7%                                   | 91.2%                       |
| <b>Especificidad</b> | 50%                                   | 50%                                     | 50%                         |
| <b>LR + (95% IC)</b> | 1.89 (1.42-2.5)                       | 1.71 (1.28-2.3)                         | 1.82 (1.37-2.43)            |
| <b>LR - (95% IC)</b> | 0.11 (0.06-1.22)                      | 0.29 (0.16-0.5)                         | 0.18 (0.11-0.28)            |

Tabla 4. Criterios de Berlín para documentar espondilitis anquilosante con cambios radiográficos y no radiográficos

| Criterios de Berlín  | Espondiloartritis radiológica (n=175) | Espondiloartritis No Radiológica (n=99) | Todos los pacientes (n=274) |
|----------------------|---------------------------------------|-----------------------------------------|-----------------------------|
| <b>Sensibilidad</b>  | 75.4%                                 | 76.5%                                   | 75.8%                       |
| <b>Especificidad</b> | 83.3%                                 | 83.3%                                   | 83.3%                       |
| <b>LR + (95% IC)</b> | 4.5 (2.39-8.57)                       | 4.59 (2.42-8.73)                        | 4.55 (2.41-8.59)            |
| <b>LR - (95% IC)</b> | 0.29 (0.22-0.39)                      | 0.298(0.19-0.41)                        | 0.29 (0.23-0.37)            |

Tabla 5. Criterios de ASAS para documentar espondilitis anquilosante con cambios radiográficos y no radiográficos

| Criterios ASAS IBP   | Espondiloartritis Radiológica (n=175) | Espondiloartritis No Radiológica (n=99) | Todos los pacientes (n=274) |
|----------------------|---------------------------------------|-----------------------------------------|-----------------------------|
| <b>Sensibilidad</b>  | 71.1%                                 | 70.4%                                   | 74.7%                       |
| <b>Especificidad</b> | 72.9%                                 | 72.9%                                   | 72.9%                       |
| <b>LR + (95% IC)</b> | 2.85 (1.78-4.56)                      | 2.6 (1.61-4.21)                         | 2.76 (1.73-4.41)            |
| <b>LR - (95% IC)</b> | 0.31 (0.23-0.43)                      | 0.41(0.29-0.58)                         | 0.35 (0.27-0.45)            |

## Resumen de la evidencia

En resumen, de acuerdo con los estudios que han evaluado las diferentes escalas de tamizaje de dolor lumbar inflamatorio para la identificación temprana de pacientes con espondiloartritis axial, podemos decir:

Los criterios de Calín, evalúan cinco características de dolor; han mostrado una sensibilidad variable en los diferentes estudios, que está entre 64% a 94% y con una especificidad entre 25% y 50%. Teniendo en cuenta los valores altos de sensibilidad reportados en algunos estudios, se puede considerar una prueba adecuada para el tamizaje. Por su baja especificidad, se pueden esperar altas tasas de falsos negativos, lo que puede tener un efecto sobre el uso de recursos adicionales que requieren estos pacientes para confirmar o descartar la presencia de enfermedad. Como limitación, los criterios de Calín no se basan en preguntas estandarizadas.

Los criterios de Berlín muestran igualmente una sensibilidad variable y más baja que los criterios de Calín, que va entre 59-81%, con una especificidad entre 32-83%, un rango muy amplio que no permite mayor certeza de su desempeño como prueba diagnóstica. Por su potencial sensibilidad, que ha sido confirmada en los estudios realizados en diversas poblaciones, la prueba podría ser adecuada para el tamizaje, pero en general ha mostrado una especificidad baja. Se pueden esperar altas tasas de falsos positivos. Como limitaciones los criterios de Berlín no se basan en preguntas estandarizadas, lo que puede llevar en su aplicación a una variación importante de los resultados a pesar de las características operativas demostradas.

Los criterios de Dolor lumbar de ASAS, que evalúa cinco parámetros del dolor, han mostrado una sensibilidad y una especificidad igualmente variables a través de los estudios, entre 34 y 71% y entre 39 y 79% respectivamente. Lo que tampoco permite tener mayor certeza de su desempeño como prueba diagnóstica regular para el diagnóstico de EPA en personas que cursan con dolor lumbar. La posibilidad de altas tasas de falsos positivos y falsos negativos (por su potencial baja sensibilidad y baja especificidad) puede tener un efecto desfavorable sobre la precisión del diagnóstico y consecuentemente manejo temprano de la enfermedad, que impactarán los costos de atención.

## Preferencia de pacientes

No se identificaron estudios que reporten preferencias de los pacientes con EspAax sobre el proceso de tamizaje para diagnóstico de la enfermedad. Sin embargo, teniendo en consideración que el manejo de la enfermedad ha mejorado mucho con la introducción de nuevos regímenes farmacológicos que aumentan el potencial de remisión clínica, se prevé que los pacientes preferirán un diagnóstico temprano para poder tener acceso al tratamiento adecuado. Particularmente porque, si no se trata, la EspAax puede provocar daños graves y discapacidad o mortalidad a menudo relacionada con afectación cardiovascular (7). La progresión puede continuar a través de lo que deberían ser los años económicamente activos de una persona y afectar en forma importante su calidad de vida relacionada con salud, particularmente si evoluciona a espondiloartritis anquilosante.

Se ha observado que una proporción notable de pacientes puede requerir asistencia en el trabajo o incluso retirarse de la fuerza laboral, mientras que también aumentan las dificultades sociales y psicológicas (8-10).

Se identificó una revisión sistemática (10) que tuvo como objetivos resumir el impacto de la EA en la calidad de vida de los pacientes y revisar la evidencia de factores asociados o que predicen la calidad de vida en EspAax, incluyendo variables sociodemográficas, parámetros clínicos, tratamiento y estrategias de manejo, y factores psicosociales con énfasis en el impacto de la angustia psicológica (depresión y ansiedad). La revisión incluyó 32 estudios y presenta una síntesis narrativa de los resultados agrupados por tipo de desenlaces evaluados. Al preguntar a los pacientes con EspAax que informaran la presencia e importancia de los problemas y preocupaciones en los diferentes aspectos de la calidad de vida, entre los aspectos más comúnmente afectados se reportaron: la vida familiar, la vida sexual, la duración y calidad del sueño, la capacidad parental y la vida laboral. Entre los estudios incluidos se encontró que en los pacientes con EPA era un 50% más probable que nunca se hubieran casado y un 30% más de probable ser divorciados en comparación con la población general. Entre las mujeres con EPA se observó que eran menos propensas de lo esperado a tener hijos. La capacidad parental también se ve afectada (hasta 77% de los pacientes informan dificultades con la crianza), entre los problemas más comunes se reportaron el levantar a un niño, alentar un niño y mantenerse al día con el niño en términos de la energía requerida. Respecto a la vida sexual hasta un 38.0% de los pacientes con EA informaron que sus relaciones sexuales se vieron afectadas "moderadamente" o extremadamente por la enfermedad; los hombres informaron mayores problemas sexuales como disminución del deseo, frecuencia de relaciones sexuales relaciones sexuales y satisfacción.

Entre las preocupaciones más frecuentemente reportadas por los pacientes como "muy importantes" en los estudios incluidos en esta revisión, se incluyen la función física deficiente asociada a rigidez, dolor, fatiga y falta de sueño y los efectos secundarios de los medicamentos. Por otro lado, aspectos de salud mental como depresión, ansiedad, afrontamiento de enfermedades y las relaciones sociales, fueron calificadas como menos frecuentes y consideradas como no muy importantes.

La mayoría de los estudios concluyeron que todo tipo de tratamientos tienen efectos beneficiosos, mejorando su calidad de vida a largo plazo. La educación del paciente, la fisioterapia y las intervenciones farmacológicas constituyen los hitos del tratamiento de la EA.

Los autores de la RS concluyen que a pesar de que los datos de los estudios de calidad de vida son bastante conflictivos por diferencias en los métodos usados en todos los estudios, la evidencia evaluada, en general sugiere que el tratamiento temprano contribuye en gran medida en la mejora de la calidad de vida en EPA, como se anticipó (10).

## Recursos requeridos y Costos

No se identificaron estudios que hayan evaluado el consumo de recursos al aplicar estas pruebas como tamizaje, tampoco análisis económicos que hayan evaluado comparativamente los costos y efectividad del uso de las escalas de tamizaje con otras formas de diagnóstico de la EspAax. Sin embargo, es de considerar que estas pruebas son de fácil realización, pueden ser aplicadas por personal de salud o ser auto diligenciados por los pacientes en formatos físicos o electrónicos, lo que implica bajo consumo de recursos y por tanto bajos costos de implementación, que comparado con

los costos de estudios serológicos o imagenológicos puede hacerlas muy atractivas en aras de un uso más eficiente de los recursos en salud.

A pesar de que estas pruebas pueden ayudar a caracterizar a los pacientes con dolor lumbar en una primera aproximación, no se puede desconocer que ante la falta de consistencia en los resultados en sus características operativas (sensibilidad, especificidad) a través de los estudios que las han evaluado (4-6) y la falta de certeza en la evidencia (ver anexo 1 tabla GRADE), es muy probable que se requieran estudios adicionales para confirmar el diagnóstico de EPA, lo que generará un impacto importante en los costos de atención el proceso diagnóstico de la enfermedad.

### **Aceptabilidad de la opción a recomendar**

No hay estudios que reporten sobre la aceptabilidad de los interesados (personal de salud, funcionarios del sistema y otros) de las diferentes escalas. Parece no existir razones para que haya baja aceptabilidad de estas escalas en el proceso diagnóstico.



## MARCO DE LA EVIDENCIA A LAS DECISIONES

| PREGUNTA               |                                                         |
|------------------------|---------------------------------------------------------|
| POBLACION              | Pacientes con dolor inflamatorio de columna             |
| INTERVENCIÓN           | Algoritmo de Berlín, criterios ASAS, Criterios de Calín |
| COMPARACIÓN            |                                                         |
| DESENLACES PRINCIPALES | Diagnóstico de espondiloartritis axial                  |
| ÁMBITO                 | Ambulatorio                                             |
| PERSPECTIVA            | Del grupo desarrollador de la Guía                      |
| CONFLICTO DE INTERÉS:  | No se manifestó ningún conflicto de interés             |

## Evaluación

| Problema                                                                                                                                                                                                                       |                                                                                                                                                                                                                                                                                                                                                                                                                                                                                                          |                             |
|--------------------------------------------------------------------------------------------------------------------------------------------------------------------------------------------------------------------------------|----------------------------------------------------------------------------------------------------------------------------------------------------------------------------------------------------------------------------------------------------------------------------------------------------------------------------------------------------------------------------------------------------------------------------------------------------------------------------------------------------------|-----------------------------|
| ¿Es el problema una prioridad?                                                                                                                                                                                                 |                                                                                                                                                                                                                                                                                                                                                                                                                                                                                                          |                             |
| JUICIO                                                                                                                                                                                                                         | EVIDENCIA DE LA INVESTIGACION                                                                                                                                                                                                                                                                                                                                                                                                                                                                            | CONSIDERACIONES ADICIONALES |
| <input type="radio"/> No<br><input type="radio"/> Probablemente No<br><input type="radio"/> Probablemente Si<br><input checked="" type="radio"/> Si<br><input type="radio"/> Es variable<br><input type="radio"/> No se conoce | La espondilitis anquilosante es la enfermedad reumatológica con más retraso en el diagnóstico, el cual ha sido reportado en algunos artículos hasta de 9 años. El dolor inflamatorio de espalda es el síntoma más frecuente y también la primera manifestación en la mayoría de los pacientes y el reconocimiento de este dolor es fundamental para el diagnóstico temprano en ausencia de sacroileítis radiológica. La importancia del diagnóstico temprano radica en la disponibilidad de tratamientos |                             |

|                                                                                                                                                                                                                                            | efectivos como los anti TNF, los cuales han mostrado ser más eficaces cuando se usan en estadios tempranos de la enfermedad. (8)                                                                                                                                                                                                                                                                                                                                                                                                                                                                                                                                                                                                                                                                                                                                                                                                                                                                                                                                                                                                                                                                                                                                                                                                                                                                                                                                                                                                                                                               |                                     |                                                            |                                                                                                 |                                    |                                 |             |                    |                   |                                          |                                        |                                     |      |                                                                                                 |  |                                                                 |                                      |                                     |  |  |
|--------------------------------------------------------------------------------------------------------------------------------------------------------------------------------------------------------------------------------------------|------------------------------------------------------------------------------------------------------------------------------------------------------------------------------------------------------------------------------------------------------------------------------------------------------------------------------------------------------------------------------------------------------------------------------------------------------------------------------------------------------------------------------------------------------------------------------------------------------------------------------------------------------------------------------------------------------------------------------------------------------------------------------------------------------------------------------------------------------------------------------------------------------------------------------------------------------------------------------------------------------------------------------------------------------------------------------------------------------------------------------------------------------------------------------------------------------------------------------------------------------------------------------------------------------------------------------------------------------------------------------------------------------------------------------------------------------------------------------------------------------------------------------------------------------------------------------------------------|-------------------------------------|------------------------------------------------------------|-------------------------------------------------------------------------------------------------|------------------------------------|---------------------------------|-------------|--------------------|-------------------|------------------------------------------|----------------------------------------|-------------------------------------|------|-------------------------------------------------------------------------------------------------|--|-----------------------------------------------------------------|--------------------------------------|-------------------------------------|--|--|
| Efectos deseables (beneficios de la opción a recomendar)                                                                                                                                                                                   |                                                                                                                                                                                                                                                                                                                                                                                                                                                                                                                                                                                                                                                                                                                                                                                                                                                                                                                                                                                                                                                                                                                                                                                                                                                                                                                                                                                                                                                                                                                                                                                                |                                     |                                                            |                                                                                                 |                                    |                                 |             |                    |                   |                                          |                                        |                                     |      |                                                                                                 |  |                                                                 |                                      |                                     |  |  |
| ¿Qué tan sustanciales son los efectos deseables de la opción?                                                                                                                                                                              |                                                                                                                                                                                                                                                                                                                                                                                                                                                                                                                                                                                                                                                                                                                                                                                                                                                                                                                                                                                                                                                                                                                                                                                                                                                                                                                                                                                                                                                                                                                                                                                                |                                     |                                                            |                                                                                                 |                                    |                                 |             |                    |                   |                                          |                                        |                                     |      |                                                                                                 |  |                                                                 |                                      |                                     |  |  |
| JUICIO                                                                                                                                                                                                                                     | EVIDENCIA DE LA INVESTIGACION                                                                                                                                                                                                                                                                                                                                                                                                                                                                                                                                                                                                                                                                                                                                                                                                                                                                                                                                                                                                                                                                                                                                                                                                                                                                                                                                                                                                                                                                                                                                                                  | CONSIDERACIONES ADICIONALES         |                                                            |                                                                                                 |                                    |                                 |             |                    |                   |                                          |                                        |                                     |      |                                                                                                 |  |                                                                 |                                      |                                     |  |  |
| <div><div><div></div><div></div><div>Moderados</div><div></div><div></div><div></div><div></div></div><div><div>Triviales</div><div>Pequeños</div><div>Moderados</div><div>Grandes</div><div>Varían</div><div>No se sabe</div></div></div> | <div>La evidencia encontrada no permite identificar cuál de las escalas presenta mejor desempeño en el proceso diagnóstico. Todas presentan gran variabilidad en los resultados a través de los estudios que las han evaluado. Los estudios usaron diferentes patrones de referencia por lo que no es posible hacer un análisis agrupado de los resultados. La certeza en la evidencia se evaluó para cada escala en particular según su desempeño ante diferentes prevalencias de la enfermedad reportada en los estudios entre los pacientes con dolor de espalda lumbar (5% y 1%).</div> <div>Algoritmo de Berlín en el tamizaje de pacientes adultos con dolor lumbar para definir (apéndice 1)</div> <table><thead><tr><th rowspan="2">Resultados del Test</th><th colspan="2">Numero de resultados por 1000 pacientes testeados (95% IC)</th><th rowspan="2">Número de participantes (estudios)</th><th rowspan="2">Calidad de la evidencia (GRADE)</th><th rowspan="2">Comentarios</th></tr><tr><th>Prevalencia 5% (1)</th><th>Prevalencia 1%(2)</th></tr></thead><tbody><tr><td>Verdaderos positivos (pacientes con EPA)</td><td>41 por 1000 (95% IC: 38 a 44 por 1000)</td><td>3 por 1000 (95% IC: 2 a 3 por 1000)</td><td rowspan="2">1219</td><td rowspan="2"><div><div><div></div><div></div><div></div><div></div></div><div>BAJA<sup>1 2</sup></div></div></td><td></td></tr><tr><td>Falsos negativos (pacientes mal clasificados como no tener EPA)</td><td>9 por 1000 (95% IC: 12 a 6 por 1000)</td><td>2 por 1000 (95% IC: 3 a 3 por 1000)</td><td></td></tr></tbody></table> | Resultados del Test                 | Numero de resultados por 1000 pacientes testeados (95% IC) |                                                                                                 | Número de participantes (estudios) | Calidad de la evidencia (GRADE) | Comentarios | Prevalencia 5% (1) | Prevalencia 1%(2) | Verdaderos positivos (pacientes con EPA) | 41 por 1000 (95% IC: 38 a 44 por 1000) | 3 por 1000 (95% IC: 2 a 3 por 1000) | 1219 | <div><div><div></div><div></div><div></div><div></div></div><div>BAJA<sup>1 2</sup></div></div> |  | Falsos negativos (pacientes mal clasificados como no tener EPA) | 9 por 1000 (95% IC: 12 a 6 por 1000) | 2 por 1000 (95% IC: 3 a 3 por 1000) |  |  |
| Resultados del Test                                                                                                                                                                                                                        | Numero de resultados por 1000 pacientes testeados (95% IC)                                                                                                                                                                                                                                                                                                                                                                                                                                                                                                                                                                                                                                                                                                                                                                                                                                                                                                                                                                                                                                                                                                                                                                                                                                                                                                                                                                                                                                                                                                                                     |                                     | Número de participantes (estudios)                         | Calidad de la evidencia (GRADE)                                                                 |                                    |                                 |             | Comentarios        |                   |                                          |                                        |                                     |      |                                                                                                 |  |                                                                 |                                      |                                     |  |  |
|                                                                                                                                                                                                                                            | Prevalencia 5% (1)                                                                                                                                                                                                                                                                                                                                                                                                                                                                                                                                                                                                                                                                                                                                                                                                                                                                                                                                                                                                                                                                                                                                                                                                                                                                                                                                                                                                                                                                                                                                                                             | Prevalencia 1%(2)                   |                                                            |                                                                                                 |                                    |                                 |             |                    |                   |                                          |                                        |                                     |      |                                                                                                 |  |                                                                 |                                      |                                     |  |  |
| Verdaderos positivos (pacientes con EPA)                                                                                                                                                                                                   | 41 por 1000 (95% IC: 38 a 44 por 1000)                                                                                                                                                                                                                                                                                                                                                                                                                                                                                                                                                                                                                                                                                                                                                                                                                                                                                                                                                                                                                                                                                                                                                                                                                                                                                                                                                                                                                                                                                                                                                         | 3 por 1000 (95% IC: 2 a 3 por 1000) | 1219                                                       | <div><div><div></div><div></div><div></div><div></div></div><div>BAJA<sup>1 2</sup></div></div> |                                    |                                 |             |                    |                   |                                          |                                        |                                     |      |                                                                                                 |  |                                                                 |                                      |                                     |  |  |
| Falsos negativos (pacientes mal clasificados como no tener EPA)                                                                                                                                                                            | 9 por 1000 (95% IC: 12 a 6 por 1000)                                                                                                                                                                                                                                                                                                                                                                                                                                                                                                                                                                                                                                                                                                                                                                                                                                                                                                                                                                                                                                                                                                                                                                                                                                                                                                                                                                                                                                                                                                                                                           | 2 por 1000 (95% IC: 3 a 3 por 1000) |                                                            |                                                                                                 |                                    |                                 |             |                    |                   |                                          |                                        |                                     |      |                                                                                                 |  |                                                                 |                                      |                                     |  |  |

|                                                                 |                                              |                                              |      |                                                                                                            |  |
|-----------------------------------------------------------------|----------------------------------------------|----------------------------------------------|------|------------------------------------------------------------------------------------------------------------|--|
| Verdaderos Negativos<br>(pacientes que no tienen EPA)           | 304 por 1000 (95% IC:<br>247 a 361 por 1000) | 597 por 1000 (95% IC:<br>557 a 637 por 1000) | 1219 | <br>BAJA <sup>1 2</sup> |  |
| Falsos positivos<br>(pacientes mal clasificados que tienen EPA) | 646 por 1000 (95% IC:<br>703 a 589 por 1000) | 398 por 1000 (95% IC:<br>438 a 358 por 1000) |      |                                                                                                            |  |
| Inconclusos                                                     |                                              |                                              |      | -                                                                                                          |  |
| Complicaciones                                                  | No fueron reportadas complicaciones          |                                              |      |                                                                                                            |  |

1. Los estudios emplearon diferentes patrones de referencia
2. Variabilidad en los reportes de sensibilidad y especificidad de los estudios

**Criterios de ASAS de dolor lumbar inflamatorio en el tamizaje de pacientes adultos con dolor lumbar para definir espondiloartritis axial (apéndice 2)**

| Resultados del Test                                                | Numero de resultados por 1000 pacientes testeados (95% IC) |                                              | Número de participantes (estudios) | Calidad de la evidencia (GRADE)                                                                              | Comentarios |
|--------------------------------------------------------------------|------------------------------------------------------------|----------------------------------------------|------------------------------------|--------------------------------------------------------------------------------------------------------------|-------------|
|                                                                    | Prevalencia 5% (1)                                         | Prevalencia 1%(2)                            |                                    |                                                                                                              |             |
| Verdaderos Positivos<br>(pacientes con EPA)                        | 37 por 1000 (95% IC:<br>34 a 40 por 1000)                  | 3 por 1000 (95% IC:<br>3 a 5 por 1000)       | 1219                               | <br>BAJA <sup>1 2</sup> |             |
| Falsos negativos<br>(pacientes mal clasificados como no tener EPA) | 13 por 1000 (95% IC:<br>16 a 10 por 1000)                  | 7 por 1000 (95% IC:<br>7 a 5 por 1000)       |                                    |                                                                                                              |             |
| Verdaderos negativos<br>(pacientes que no tienen EPA)              | 380 por 1000 (95% IC:<br>314 a 437 por 1000)               | 782 por 1000 (95% IC:<br>742 a 812 por 1000) | 1219                               | <br>BAJA <sup>1 2</sup> |             |

|                                                              |                                           |                                           |  |   |  |
|--------------------------------------------------------------|-------------------------------------------|-------------------------------------------|--|---|--|
|                                                              |                                           |                                           |  |   |  |
| Falsos positivos (pacientes mal clasificados que tienen EPA) | 570 por 1000 (95% IC: 636 a 513 por 1000) | 208 por 1000 (95% IC: 248 a 178 por 1000) |  |   |  |
| Inconclusos                                                  |                                           |                                           |  | - |  |
| Complicaciones                                               | No fueron reportadas complicaciones       |                                           |  |   |  |

1. Los estudios emplearon diferentes patrones de referencia
2. Variabilidad en los reportes de sensibilidad y especificidad de los estudios

**Criterios de Calín de dolor lumbar inflamatorio en el tamizaje de pacientes adultos con dolor lumbar para definir espondiloartritis axial**

| Resultados del Test                                             | Numero de resultados por 1000 pacientes testeados (95% IC) |                                           | Número de participantes (estudios) | Calidad de la evidencia (GRADE) | Comentarios |
|-----------------------------------------------------------------|------------------------------------------------------------|-------------------------------------------|------------------------------------|---------------------------------|-------------|
|                                                                 | Prevalencia 5% (1)                                         | Prevalencia 1%(2)                         |                                    |                                 |             |
| Verdaderos positivos (pacientes con EPA)                        | 40 por 1000 (95% IC: 37 a 43 por 1000)                     | 6 por 1000 (95% IC: 5 a 7 por 1000)       | 1219                               | ⊕⊕○○<br>BAJA <sup>1 2</sup>     |             |
| Falsos negativos (pacientes mal clasificados como no tener EPA) | 10 por 1000 (95% IC: 13 a 7 por 1000)                      | 4 por 1000 (95% IC: 5 a 3 por 1000)       |                                    |                                 |             |
| Verdaderos negativos (pacientes que no tienen EPA)              | 238 por 1000 (95% IC: 181 a 295 por 1000)                  | 495 por 1000 (95% IC: 455 a 535 por 1000) | 1219                               | ⊕⊕○○<br>BAJA <sup>1 2</sup>     |             |
| Falsos positivos (pacientes mal)                                | 712 por 1000 (95% IC: 769 a 655 por 1000)                  | 495 por 1000 (95% IC: 455 a 535 por 1000) |                                    |                                 |             |

|  |                                                                                                                                                |                                     |  |  |   |  |  |
|--|------------------------------------------------------------------------------------------------------------------------------------------------|-------------------------------------|--|--|---|--|--|
|  | clasificados que tienen EPA)                                                                                                                   |                                     |  |  |   |  |  |
|  | Inconclusos                                                                                                                                    |                                     |  |  | - |  |  |
|  | Complicaciones                                                                                                                                 | No fueron reportadas complicaciones |  |  |   |  |  |
|  |                                                                                                                                                |                                     |  |  |   |  |  |
|  | 1. Los estudios emplearon diferentes patrones de referencia<br>2. Variabilidad en los reportes de sensibilidad y especificidad de los estudios |                                     |  |  |   |  |  |

Efectos Indeseables

¿Qué tan sustanciales son los efectos indeseables que se pueden anticipar?

| JUICIO                                                                                                                                                           | EVIDENCIA DE LA INVESTIGACION                                                                                                                                                                                                                                                                                                                                              | CONSIDERACIONES ADICIONALES |
|------------------------------------------------------------------------------------------------------------------------------------------------------------------|----------------------------------------------------------------------------------------------------------------------------------------------------------------------------------------------------------------------------------------------------------------------------------------------------------------------------------------------------------------------------|-----------------------------|
| <div><div>o Triviales</div><div><div><div>o Pequeños</div><div>o Moderados</div><div>o Grandes</div><div>o Varían</div><div>o No se sabe</div></div></div></div> | La aplicación de los cuestionarios no impone riesgos ni efectos indeseables sobre los pacientes, pueden ser aplicados por personal de la salud o auto diligenciados. El reporte positivo del cuestionario puede llevar a la realización de estudios diagnósticos adicionales serológicos y imagenológicos, tipo radiografía o resonancia de columna lumbar y sacroilíacas. |                             |

Certeza en la Evidencia

¿Cuál es la certeza en la evidencia global sobre los efectos de la opción a recomendar?

| JUICIO | EVIDENCIA DE LA INVESTIGACION | CONSIDERACIONES ADICIONALES |
|--------|-------------------------------|-----------------------------|
|--------|-------------------------------|-----------------------------|

| <ul style="list-style-type: none"> <li>○ Muy baja</li> <li>○ Baja</li> <li>○ Moderada</li> <li>○ Alta</li> <li>○ No se identificaron estudios</li> </ul>                                                                                                                                         | <table border="1" data-bbox="426 245 1488 394"> <thead> <tr> <th data-bbox="426 245 714 321">Desenlace</th><th data-bbox="714 245 1031 321">Importancia relativa</th><th data-bbox="1031 245 1488 321">Certeza en la Evidencia (GRADE)</th></tr> </thead> <tbody> <tr> <td data-bbox="426 321 714 394">Diagnóstico de EA</td><td data-bbox="714 321 1031 394">CRITICAL</td><td data-bbox="1031 321 1488 394">⊕⊕○○ BAJA</td></tr> </tbody> </table>                                                                                                                                                                                                                                                                                                                   | Desenlace                                                                                                                                                                                                                                                                                                                                                                                                                                                                                                                                                                                                                       | Importancia relativa | Certeza en la Evidencia (GRADE) | Diagnóstico de EA | CRITICAL | ⊕⊕○○ BAJA |  |
|--------------------------------------------------------------------------------------------------------------------------------------------------------------------------------------------------------------------------------------------------------------------------------------------------|----------------------------------------------------------------------------------------------------------------------------------------------------------------------------------------------------------------------------------------------------------------------------------------------------------------------------------------------------------------------------------------------------------------------------------------------------------------------------------------------------------------------------------------------------------------------------------------------------------------------------------------------------------------------------------------------------------------------------------------------------------------------|---------------------------------------------------------------------------------------------------------------------------------------------------------------------------------------------------------------------------------------------------------------------------------------------------------------------------------------------------------------------------------------------------------------------------------------------------------------------------------------------------------------------------------------------------------------------------------------------------------------------------------|----------------------|---------------------------------|-------------------|----------|-----------|--|
| Desenlace                                                                                                                                                                                                                                                                                        | Importancia relativa                                                                                                                                                                                                                                                                                                                                                                                                                                                                                                                                                                                                                                                                                                                                                 | Certeza en la Evidencia (GRADE)                                                                                                                                                                                                                                                                                                                                                                                                                                                                                                                                                                                                 |                      |                                 |                   |          |           |  |
| Diagnóstico de EA                                                                                                                                                                                                                                                                                | CRITICAL                                                                                                                                                                                                                                                                                                                                                                                                                                                                                                                                                                                                                                                                                                                                                             | ⊕⊕○○ BAJA                                                                                                                                                                                                                                                                                                                                                                                                                                                                                                                                                                                                                       |                      |                                 |                   |          |           |  |
| Valores de los pacientes<br>¿Hay variación o poca certeza sobre cómo valoran las personas/los pacientes los desenlaces principales?                                                                                                                                                              |                                                                                                                                                                                                                                                                                                                                                                                                                                                                                                                                                                                                                                                                                                                                                                      |                                                                                                                                                                                                                                                                                                                                                                                                                                                                                                                                                                                                                                 |                      |                                 |                   |          |           |  |
| <b>JUICIO</b>                                                                                                                                                                                                                                                                                    | <b>EVIDENCIA DE LA INVESTIGACION</b>                                                                                                                                                                                                                                                                                                                                                                                                                                                                                                                                                                                                                                                                                                                                 | <b>CONSIDERACIONES ADICIONALES</b>                                                                                                                                                                                                                                                                                                                                                                                                                                                                                                                                                                                              |                      |                                 |                   |          |           |  |
| <ul style="list-style-type: none"> <li>○ Variabilidad o incertidumbre importante</li> <li>○ Posiblemente hay variabilidad o incertidumbre importante</li> <li>○ Posiblemente No hay variabilidad o incertidumbre importante</li> <li>○ No hay variabilidad o incertidumbre importante</li> </ul> | <p>No se encontraron estudios de valores y preferencias de pacientes en espondiloartritis con relación a las pruebas de tamizaje.</p> <p>Una RS que incluyó 32 estudios mostró que los pacientes tienen gran preocupación por las consecuencias de la progresión de la enfermedad, particularmente por su impacto en aspectos relacionados con su desempeño laboral, capacidad parental, vida sexual y familiar. Los autores concluyen que a pesar de que los datos de los estudios de calidad de vida son bastante conflictivos por diferencias en los métodos usados en todos los estudios, la evidencia evaluada, en general sugiere que el diagnóstico temprano y tratamiento temprano contribuyen en gran medida en la mejora de la calidad de vida en EPA.</p> | <p>El manejo de la enfermedad ha mejorado mucho con la introducción de nuevos regímenes farmacológicos que aumentan el potencial de remisión clínica, se prevé que los pacientes preferirán un diagnóstico temprano para poder tener acceso al tratamiento adecuado. Particularmente porque, si no se trata, la EspAax puede provocar daños graves y discapacidad o mortalidad a menudo relacionada con afectación cardiovascular (7). La progresión puede continuar a través de lo que deberían ser los años económicamente activos de una persona y afectar en forma importante su calidad de vida relacionada con salud,</p> |                      |                                 |                   |          |           |  |

|                                                                                                                                                                                                                                                                   |                                                                                                                                                                                                                                                                                                                   |                                                                                                                                                                                                                                                                                         |
|-------------------------------------------------------------------------------------------------------------------------------------------------------------------------------------------------------------------------------------------------------------------|-------------------------------------------------------------------------------------------------------------------------------------------------------------------------------------------------------------------------------------------------------------------------------------------------------------------|-----------------------------------------------------------------------------------------------------------------------------------------------------------------------------------------------------------------------------------------------------------------------------------------|
|                                                                                                                                                                                                                                                                   |                                                                                                                                                                                                                                                                                                                   | particularmente si evoluciona a espondiloartritis anquilosante. Se ha observado que una proporción notable de pacientes puede requerir asistencia en el trabajo o incluso retirarse de la fuerza laboral, mientras que también aumentan las dificultades sociales y psicológicas (8,9). |
| <p>Balance de los efectos</p> <p>¿El balance entre los efectos deseables e indeseables favorece la opción o el comparador?</p>                                                                                                                                    |                                                                                                                                                                                                                                                                                                                   |                                                                                                                                                                                                                                                                                         |
| JUICIO                                                                                                                                                                                                                                                            | EVIDENCIA DE LA INVESTIGACION                                                                                                                                                                                                                                                                                     | CONSIDERACIONES ADICIONALES                                                                                                                                                                                                                                                             |
| <p>o Favorece al comparador</p> <p>o Probablemente favorece al comparador</p> <p>o No favorece al comparador ni a la opción en evaluación</p> <p>o Probablemente favorece a la opción</p> <p><b>o Favorece a la opción</b></p> <p>o Varía</p> <p>o No se sabe</p> | No se identificaron estudios que evalúen comparativamente El balance entre los efectos deseables del diagnóstico temprano y el inicio de manejo farmacológico temprano con el potencial de limitar la progresión de la enfermedad, favorece los riesgos de la aplicación de los cuestionarios que son casi nulos. |                                                                                                                                                                                                                                                                                         |
| <p>Recursos requeridos</p> <p>Que tan grande es el requerimiento de recursos (costos)?</p>                                                                                                                                                                        |                                                                                                                                                                                                                                                                                                                   |                                                                                                                                                                                                                                                                                         |
| JUICIO                                                                                                                                                                                                                                                            | EVIDENCIA DE LA INVESTIGACION                                                                                                                                                                                                                                                                                     | CONSIDERACIONES ADICIONALES                                                                                                                                                                                                                                                             |

| <ul style="list-style-type: none"> <li>○ Grandes costos</li> <li>○ Costos moderados</li> <li>○ no significantes costos ni ahorros</li> <li>○ Moderados ahorros</li> <li>○ Grandes ahorros</li> <li>○ Varían</li> <li>○ No se sabe</li> </ul>               | <p>No se encontraron estudios que hayan evaluado los costos.</p>                                                         | <p>La aplicación de dichos cuestionarios no requiere de un gasto en recursos significativos y si pudiera generar ahorro de recursos priorizando la realización de estudios adicionales en pacientes que cumplan características de dolor lumbar inflamatorio. La gran variabilidad en su precisión diagnóstica y falta de certeza en la evidencia, sin embargo, dejan un importante cuestionamiento respecto a efectividad y por tanto a su beneficio en el proceso diagnóstico, dejando abierta la posibilidad de aumento de costos de atención.</p> |
|------------------------------------------------------------------------------------------------------------------------------------------------------------------------------------------------------------------------------------------------------------|--------------------------------------------------------------------------------------------------------------------------|-------------------------------------------------------------------------------------------------------------------------------------------------------------------------------------------------------------------------------------------------------------------------------------------------------------------------------------------------------------------------------------------------------------------------------------------------------------------------------------------------------------------------------------------------------|
| <p>Equidad</p> <p>¿La implementación de la opción, tendrá impacto en la equidad?</p>                                                                                                                                                                       |                                                                                                                          |                                                                                                                                                                                                                                                                                                                                                                                                                                                                                                                                                       |
| JUICIO                                                                                                                                                                                                                                                     | EVIDENCIA DE LA INVESTIGACION                                                                                            | CONSIDERACIONES ADICIONALES                                                                                                                                                                                                                                                                                                                                                                                                                                                                                                                           |
| <ul style="list-style-type: none"> <li>○ Reduce</li> <li>○ Probablemente se reduce la inequidad</li> <li>○ Probablemente no impacta la equidad</li> <li>○ Probablemente incrementa</li> <li>○ Incrementa</li> <li>○ Varia</li> <li>○ No se sabe</li> </ul> | <p>No se encontraron estudios de equidad de pacientes en espondiloartritis con relación a los procesos diagnósticos.</p> | <p>Dada la facilidad de la aplicación de las escalas y los pocos recursos requeridos para la misma, se prevé que podrá estar disponible en todos los sectores del sistema de atención de salud, facilitando el acceso a diagnóstico oportuno a todos los que lo requieran.</p>                                                                                                                                                                                                                                                                        |
| <p>Aceptabilidad</p> <p>¿Es la opción aceptada por los diferentes actores involucrados en su implementación?</p>                                                                                                                                           |                                                                                                                          |                                                                                                                                                                                                                                                                                                                                                                                                                                                                                                                                                       |



| JUICIO                                                                                                                                                                                                                 | EVIDENCIA DE LA INVESTIGACION                                                                                                  | CONSIDERACIONES ADICIONALES                                                                                   |
|------------------------------------------------------------------------------------------------------------------------------------------------------------------------------------------------------------------------|--------------------------------------------------------------------------------------------------------------------------------|---------------------------------------------------------------------------------------------------------------|
| <input type="radio"/> No<br><input type="radio"/> Probablemente no<br><input type="radio"/> Probablemente si<br><input checked="" type="radio"/> Si<br><input type="radio"/> Varia<br><input type="radio"/> No se sabe | En las guías no se documentaron recomendaciones específicas hacia el uso de alguno de los cuestionarios de forma preferencial. |                                                                                                               |
| <b>Factibilidad</b><br>¿Es la opción factible de IMPLEMENTAR?                                                                                                                                                          |                                                                                                                                |                                                                                                               |
| JUICIO                                                                                                                                                                                                                 | EVIDENCIA DE LA INVESTIGACION                                                                                                  | CONSIDERACIONES ADICIONALES                                                                                   |
| No<br><input type="radio"/> Probablemente no<br><input type="radio"/> Probablemente si<br><input checked="" type="radio"/> Si<br><input type="radio"/> Varia<br><input type="radio"/> No se sabe                       | No se identificaron estudios que evalúen la factibilidad de aplicar estas escalas en los ámbitos asistenciales.                | La realización de dichos cuestionarios es factible y de fácil implementación en centros de atención primaria. |

## Resumen de Juicios

|                         | JUICIOS  |                  |                  |         |  |       |                     |
|-------------------------|----------|------------------|------------------|---------|--|-------|---------------------|
| PROBLEMA                | No       | Probablemente no | Probablemente si | Si      |  | Varia | No se sabe          |
| EFFECTOS DESEABLES      | Trivial  | Pequeño          | Moderado         | Grande  |  | Varia | No se sabe          |
| EFFECTOS INDESEABLES    | Grande   | Moderado         | Pequeño          | Trivial |  | Varia | No se sabe          |
| CERTEZA EN LA EVIDENCIA | Muy Bajo | Bajo             | Moderado         | Alto    |  |       | No incluyó estudios |

|                        | JUICIOS                                 |                                                      |                                                              |                                            |                            |       |            |
|------------------------|-----------------------------------------|------------------------------------------------------|--------------------------------------------------------------|--------------------------------------------|----------------------------|-------|------------|
| VALORES DE PACIENTES   | Importante incertidumbre o variabilidad | Posiblemente importante incertidumbre o variabilidad | Probablemente no hay importante incertidumbre o variabilidad | No importante incertidumbre o variabilidad |                            |       |            |
| BALANCE DE LOS EFECTOS | Favorece al comparador                  | Probablemente Favorece al comparador                 | No favorece ni a la intervención ni al comparador            | Probablemente favorece a la intervención   | Favorece a la intervención | Varia | No se sabe |
| RECURSOS REQUERIDOS    | Grandes costos                          | Moderados costos                                     | Costos y ahorros insignificantes                             | Moderados ahorros                          | Grandes ahorros            | Varia | No se sabe |
| EQUIDAD                | Reducida                                | Probablemente reducida                               | Probablemente no impactada                                   | Probablemente incrementada                 | Incrementada               | Varia | No se sabe |
| ACEPTABILIDAD          | No                                      | Probablemente no                                     | Probablemente si                                             | Si                                         |                            | Varia | No se sabe |
| FACTIBILIDAD           | No                                      | Probablemente no                                     | Probablemente si                                             | Si                                         |                            | Varia | No se sabe |

## Tipo de Recomendación

|                                                  |                                                       |                                                                                |                                                     |                                                |
|--------------------------------------------------|-------------------------------------------------------|--------------------------------------------------------------------------------|-----------------------------------------------------|------------------------------------------------|
| Recomendación fuerte en contra de la opción<br>○ | Recomendación condicional en contra de la opción<br>○ | Recomendación condicional a favor de cualquiera la opción o su comparador<br>○ | Recomendación condicional a favor de la opción<br>○ | Recomendación fuerte a favor de la opción<br>○ |
|--------------------------------------------------|-------------------------------------------------------|--------------------------------------------------------------------------------|-----------------------------------------------------|------------------------------------------------|

## Conclusiones

La realización de cuestionarios de tamizaje de dolor inflamatorio lumbar tiene como ventajas su amplia disponibilidad y fácil realización. Como limitante en los estudios los valores de sensibilidad y especificidad variaron de forma amplia teniendo en cuenta el patrón de referencia que se empleara. En general el rendimiento diagnóstico muestra que la mayor proporción de paciente se distribuye en el grupo de falsos positivos lo cual llevaría a la realización de pruebas complementarias en sujetos sin la enfermedad generando costos adicionales, pero otra gran proporción se ubica en los verdaderos negativos lo cual ayudaría a descartar la EPA y a contemplar diagnósticos alternativos.

Estas herramientas deberán entonces ser complementarias al juicio clínico a fin de contrarrestar la alta tasa de falsos positivos.

### Recomendación

En pacientes con dolor lumbar mayor de 3 meses de evolución, el panel sugiere la aplicación de criterios de clasificación para tamizaje de dolor lumbar inflamatorio. Recomendación condicional a favor, evidencia de baja calidad.

### Puntos de buena Práctica

Existen varios cuestionarios útiles para este fin, como criterios de Berlín, criterios de Calín y ASAS.

El médico en atención primaria puede valerse del uso de los criterios ASAS para este fin.

### Justificación

Como se mencionó previamente, no se identificaron revisiones sistemáticas de pruebas diagnósticas, que permitieran establecer de forma certera la superioridad de alguno de los cuestionarios. Pero No se recomendó de forma preferencial la realización de ninguno de los cuestionarios dado las características operativas de los tres cuestionarios en los estudios identificados fueron muy similares.

### Consideraciones por subgrupos

No se identifican como necesarias.

### Consideraciones de implementación

Socialización y difusión de la guía por los diferentes entes de salud y gubernamentales.

### Monitoreo y evaluación de cumplimiento

Se sugiere que dentro de la práctica clínica diaria, a todo paciente con dolor lumbar mayor de 3 meses de evolución se le aplique alguna de las escalas mencionadas como medida de tamización para la detección de pacientes con espondiloartritis axial.

### Prioridades de investigación futura

Se sugiere realizar una Revisión Sistemática de la literatura de las pruebas diagnósticas mencionadas que permita establecer de forma certera la superioridad de alguna de ellas.

## Tablas GRADE

### 1. ¿Se debe usar Algoritmo de Berlín en el tamizaje de pacientes adultos con dolor lumbar para definir espondiloartritis axial? (4)

Ámbito: Pacientes ambulatorios

Sensibilidad: (no agrupada) 0.81 (0.75 – 0.87)

Especificidad (no agrupada) 0.32 (0.26 - 0.38)

| Resultado del Test                                                        | Número de resultados por 1000 pacientes testeados (IC 95%) |                                              | Número de participantes (estudios) | Calidad de la evidencia (GRADE) | Comentarios |
|---------------------------------------------------------------------------|------------------------------------------------------------|----------------------------------------------|------------------------------------|---------------------------------|-------------|
|                                                                           | Prevalencia 5% (1)                                         | Prevalencia 1%(2)                            |                                    |                                 |             |
| <b>Verdaderos positivos</b><br>(pacientes con EPA)                        | 41 por 1000 (IC 95%:<br>38 a 44 por 1000)                  | 3 por 1000 (IC 95%:<br>2 a 3 por 1000)       | 1219                               | ⊕⊕○○<br>Baja <sup>1,2</sup>     |             |
| <b>Falsos negativos</b><br>(pacientes mal clasificados como no tener EPA) | 9 por 1000 (IC 95%:<br>12 a 6 por 1000)                    | 2 por 1000 (IC 95%:<br>3 a 3 por 1000)       |                                    |                                 |             |
| <b>Verdaderos negativos</b><br>(pacientes que no tienen EPA)              | 304 por 1000 (IC 95%:<br>247 a 361 por 1000)               | 597 por 1000 (IC 95%:<br>557 a 637 por 1000) | 1219                               | ⊕⊕○○<br>Baja <sup>1,2</sup>     |             |
| <b>Falsos positivos</b><br>(pacientes mal clasificados que tienen EPA)    | 646 por 1000 (IC 95%:<br>703 a 589 por 1000)               | 398 por 1000 (IC 95%:<br>438 a 358 por 1000) |                                    |                                 |             |
| Inconclusos                                                               |                                                            |                                              |                                    | -                               |             |
| Complicaciones                                                            | No fueron reportadas complicaciones                        |                                              |                                    |                                 |             |

1. Los estudios emplearon diferentes patrones de referencia

2. Variabilidad en los reportes de sensibilidad y especificidad de los estudios

2. ¿Se debe usar criterios de ASAS de dolor lumbar inflamatorio en el tamizaje de pacientes adultos con dolor lumbar para definir espondiloartritis axial? (4)  
(5)

**Ámbito:** Pacientes ambulatorios

**Sensibilidad:** 74.4 (68.1- 80.8)

**Especificidad:** 39.5 (33- 46.1)

| Resultados del Test                                                       | Número de resultados por 1000 pacientes testeados (IC 95%) |                                              | Número de participantes (estudios) | Calidad de la evidencia (GRADE) | Comentarios |
|---------------------------------------------------------------------------|------------------------------------------------------------|----------------------------------------------|------------------------------------|---------------------------------|-------------|
|                                                                           | Prevalencia 5% (1)                                         | Prevalencia 1%(2)                            |                                    |                                 |             |
| <b>Verdaderos positivos</b><br>(pacientes con EPA)                        | 37 por 1000 (IC 95%:<br>34 a 40 por 1000)                  | 3 por 1000 (IC 95%:<br>3 a 5 por 1000)       | 1219                               | ⊕⊕○○<br>Baja <sup>1, 2</sup>    |             |
| <b>Falsos negativos</b><br>(pacientes mal clasificados como no tener EPA) | 13 por 1000 (IC 95%:<br>16 a 10 por 1000)                  | 7 por 1000 (IC 95%:<br>7 a 5 por 1000)       |                                    |                                 |             |
| <b>Verdaderos negativos</b><br>(pacientes que no tienen EPA)              | 380 por 1000 (IC 95%:<br>314 a 437 por 1000)               | 782 por 1000 (IC 95%:<br>742 a 812 por 1000) | 1219                               | ⊕⊕○○<br>Baja <sup>1, 2</sup>    |             |
| <b>Falsos positivos</b><br>(pacientes mal clasificados que tienen EPA)    | 570 por 1000 (IC 95%:<br>636 a 513 por 1000)               | 208 por 1000 (IC 95%:<br>248 a 178 por 1000) |                                    |                                 |             |
| Inconclusos                                                               |                                                            |                                              |                                    | -                               |             |
| Complicaciones                                                            | No fueron reportadas complicaciones                        |                                              |                                    |                                 |             |

1. Los estudios emplearon diferentes patrones de referencia
2. Variabilidad en los reportes de sensibilidad y especificidad de los estudios

3. ¿Se debe usar criterios de Calín de dolor lumbar inflamatorio en el tamizaje de pacientes adultos con dolor lumbar para definir espondiloartritis axial?  
(4)(5)

Ámbito: Pacientes ambulatorios

Sensibilidad: 79 (73- 85)

Especificidad: 25.1 (19.6- 31.3)

| Resultados del Test                                                       | Número de resultados por 1000 pacientes testeados (IC 95%) |                                           | Número de participantes (estudios) | Calidad de la evidencia (GRADE) | Comentarios |
|---------------------------------------------------------------------------|------------------------------------------------------------|-------------------------------------------|------------------------------------|---------------------------------|-------------|
|                                                                           | Prevalencia 5% (1)                                         | Prevalencia 1%(2)                         |                                    |                                 |             |
| <b>Verdaderos positivos</b><br>(pacientes con EPA)                        | 40 por 1000 (IC 95%: 37 a 43 por 1000)                     | 6 por 1000 (IC 95%: 5 a 7 por 1000)       | 1219                               | ⊕⊕○○<br>Baja <sup>1,2</sup>     |             |
| <b>Falsos negativos</b><br>(pacientes mal clasificados como no tener EPA) | 10 por 1000 (IC 95%: 13 a 7 por 1000)                      | 4 por 1000 (IC 95%: 5 a 3 por 1000)       |                                    |                                 |             |
| <b>Verdaderos negativos</b><br>(pacientes que no tienen EPA)              | 238 por 1000 (IC 95%: 181 a 295 por 1000)                  | 495 por 1000 (IC 95%: 455 a 535 por 1000) | 1219                               | ⊕⊕○○<br>Baja <sup>1,2</sup>     |             |
| <b>Falsos positivos</b><br>(pacientes mal clasificados que tienen EPA)    | 712 por 1000 (IC 95%: 769 a 655 por 1000)                  | 495 por 1000 (IC 95%: 455 a 535 por 1000) |                                    |                                 |             |
| Inconclusos                                                               |                                                            |                                           |                                    | -                               |             |
| Complicaciones                                                            | No fueron reportadas complicaciones                        |                                           |                                    |                                 |             |

1. Los estudios emplearon diferentes patrones de referencia
2. Variabilidad en los reportes de sensibilidad y especificidad de los estudios

## Referencias:

1. Calin A, Porta J, Fries JF, Schurman DJ. Clinical history as a screening test for ankylosing spondylitis. *JAMA*. 13 de junio de 1977;237(24):2613-4.
2. Rudwaleit M, Landewé R, van der Heijde D, Listing J, Brandt J, Braun J, et al. The development of Assessment of SpondyloArthritis international Society classification criteria for axial spondyloarthritis (part I): classification of paper patients by expert opinion including uncertainty appraisal. *Ann Rheum Dis*. junio de 2009;68(6):770-6.
3. Sieper J, van der Heijde D, Landewé R, Brandt J, Burgos-Vagas R, Collantes-Estevez E, et al. New criteria for inflammatory back pain in patients with chronic back pain: a real patient exercise by experts from the Assessment of SpondyloArthritis international Society (ASAS). *Ann Rheum Dis*. junio de 2009;68(6):784-8.
4. Poddubnyy D, Callhoff J, Spiller I, Listing J, Braun J, Sieper J, et al. Diagnostic accuracy of inflammatory back pain for axial spondyloarthritis in rheumatological care. *RMD Open* [Internet]. 5 de diciembre de 2018 [citado 13 de abril de 2020];4(2). Disponible en: <https://www.ncbi.nlm.nih.gov/pmc/articles/PMC6336095/>
5. B Arnbak, O Hendricks, K Hørslev-Petersen, AG Jurik, SJ Pedersen, M Østergaard, LT Hermansen, AG Loft, TS Jensen & C Manniche (2016) The discriminative value of inflammatory back pain in patients with persistent low back pain, *Scandinavian Journal of Rheumatology*, 45:4, 321-328
6. Solmaz D, Akar S, Soysal O, Akkoc Y, Can G, Gerdan V, et al. Performance of different criteria sets for inflammatory back pain in patients with axial spondyloarthritis with and without radiographic sacroiliitis. *Clin Rheumatol*. 2014;33(10):1475-9.
7. Papagoras C, Markatseli TE, Saougou I, et al. Cardiovascular risk profile in patients with spondyloarthritis. *Joint Bone Spine* 2014;81(1):57-63
8. Chorus AM, Boonen A, Miedema HS, van der Linden S. Employment perspectives of patients with ankylosing spondylitis. *Ann Rheum Dis* 2002;61(8):693-9
9. Boonen A, Chorus A, Miedema H, et al. Employment, work disability, and work days lost in patients with ankylosing spondylitis: a cross sectional study of Dutch patients. *Ann Rheum Dis* 2001;60(4):353
10. Gerdan V, Akar S, Solmaz D, Pehlivan Y, Onat AM, Kisacik B, et al. Initial diagnosis of lumbar disc herniation is associated with a delay in diagnosis of ankylosing spondylitis. *J Rheumatol*. octubre de 2012;39(10):1996-9.
11. Kotsis K, Voulgari PV, Drosos AA, Carvalho AF, Hyphantis T. Health-related quality of life in patients with ankylosing spondylitis: a comprehensive review. *Expert Rev Pharmacoecon Outcomes Res*. 2014 Dec;14(6):857-72. doi: 10.1586/14737167.2014.957679. Epub 2014 Sep 5. Review. PubMed PMID: 25193010.



## Pregunta 2:

¿Para realizar el diagnóstico de espóndilo artritis axial en pacientes adultos, se debe usar Resonancia Magnética Nuclear de articulaciones sacroilíacas en vez de Rayos X de sacroilíacas?

|                     |                                                                                                                              |
|---------------------|------------------------------------------------------------------------------------------------------------------------------|
| <b>Población</b>    | Pacientes con sospecha de espondiloartritis axial                                                                            |
| <b>Intervención</b> | Resonancia Magnética nuclear (RNM)                                                                                           |
| <b>Comparación</b>  | Radiografía de columna sacro- ilíaca                                                                                         |
| <b>Desenlaces</b>   | Cambios estructurales crónicos<br>Cambios inflamatorios agudos<br>Precisión diagnóstica de espondiloartritis axial<br>Costos |

## Antecedentes:

La espondiloartritis axial (EspAax) es una enfermedad inflamatoria crónica que afecta principalmente las articulaciones vertebrales y sacroilíacas. El diagnóstico de la enfermedad se realiza por medio de criterios clínicos, radiológicos y de laboratorio (HLA B27), pero se ha descrito que pueden pasar entre 7 y 9 años desde el inicio de los síntomas hasta que se establece el diagnóstico o se presentan cambios imagenológicos en la radiografía. El retraso en el diagnóstico impacta el inicio de tratamiento, lo cual a su vez afecta la calidad de vida de los pacientes y aumenta la carga de la enfermedad. (1)

La sacroileítis es un marcador de la espondiloartritis, sin embargo, los pacientes en las fases iniciales de la enfermedad no cursan con compromiso evidente en la radiografía convencional. La espondiloartritis axial no radiológica, que con el paso del tiempo se hace evidente mostrando compromiso radiológico, es lo que se conoce como espondilitis anquilosante. (2)

Respecto a la radiografía convencional, se han descrito variaciones inter e intra observador en la interpretación de la radiografía de columna, lo cual puede conducir a imprecisiones diagnósticas en estos pacientes. Por otra parte, la resonancia nuclear magnética (RNM) ha probado su capacidad de detectar cambios inflamatorios y estructurales tempranos pre-radiográficos a nivel de la columna y las articulaciones sacroilíacas en pacientes con espondiloartritis, lo cual en la actualidad es de gran interés dada la posibilidad de inicio temprano de terapias de primera línea, incluido los anti -TNF, estrategias que tratamiento que modifican el pronóstico de la enfermedad (3). Es necesario entonces conocer comparativamente el desempeño de estas estrategias de diagnóstico con el fin de generar una recomendación sobre su uso en la detección temprana de la espondiloartritis axial.

## Evidencia

Se realizó una búsqueda amplia y completa de la literatura publicada hasta febrero de 2020 siguiendo una estrategia de búsqueda y procesos de selección predefinidos (anexo 1). En la búsqueda no se identificaron estudios que evaluaran comparativamente la RNM vs la radiografía lumbosacra en el diagnóstico temprano de la EspAax.

Este resumen se basa en cuatro estudios: una revisión sistemática que evalúa la utilidad de la RNM en el diagnóstico de la EspAax (Arnbak 2012(2)), un estudio que evalúa el valor de realizar RNM tanto en sacroilíacas como lumbar (Weber 2014 (3)), un estudio de cohorte que evalúa la precisión diagnóstica de la RNM Poddubnyy 2013 (4) y otro estudio de cohorte que evalúa la progresión radiológica de la enfermedad, cambios estructurales crónicos en pacientes con EspAax ya establecida (5).

La RS de Arnbak (2) publicada en el año 2012, tuvo como objeto determinar la utilidad de la RNM en el diagnóstico clínico de la espondiloartritis, dada la potencial capacidad de este estudio para documentar cambios inflamatorios y estructurales tempranos pre-radiográficos a nivel de la columna y las articulaciones sacroilíacas. La revisión incluyó 9 estudios no aleatorios (i.e. cohortes, casos y controles y estudios transversales) (Figura 1. Matriz de evidencia Epistemonikos), que compararon la precisión diagnóstica de la RNM con los criterios diagnósticos de New York modificados (8) como estándar de referencia, en pacientes que debían tener diagnóstico de dolor lumbar inflamatorio o diagnóstico clínico de espondiloartritis. Todos los estudios incluidos emplearon resonadores Tesla 1.5. Dada la heterogeneidad en la calidad metodológica de los estudios incluidos, los autores solo reportaron los resultados basados en los dos estudios de alta calidad, uno de los cuales evaluó la articulación sacroilíaca (Weber (6) ) y el otro la columna (Weber (7) ). El estudio de Weber en sacroilíacas (6), incluyó 75 casos con espondiloartritis establecida (EspAax) por los criterios de New York modificados (8) y duración de la enfermedad menor a 10 años; 27 sujetos con dolor inflamatorio de columna basado en criterios de Calín o Berlín y 59 controles sanos sin dolor de columna. El estudio de Weber que evaluó columna lumbar (7), comparó 35 pacientes que cumplían todos los criterios de New York modificados (8), 25 pacientes con dolor lumbar inflamatorio por criterios de Berlín y una o más características de espondiloartritis y 35 controles sanos sin dolor lumbar en un estudio de casos y controles prospectivo. Se evaluó la presencia de edema de médula ósea en diferentes localizaciones de la columna, la presencia de una o más lesiones inflamatorias vertebrales en RNM. Los autores de la revisión reportan sobre los desenlaces sensibilidad, especificidad y acuerdo Kappa.

Otro estudio del mismo autor, realizado posteriormente a la RS, Weber 2014 (3), fue conducido en Canadá con el objetivo de evaluar el valor diagnóstico de la RNM de columna sola, comparada con la RNM de sacroilíacas sola o la combinación de estos dos estudios. Incluyó 130 pacientes menores de 50 años, con dolor de espalda clasificado con los criterios de Calín y 20 controles sanos. En todos los pacientes se realizaron las dos estrategias diagnósticas y fueron evaluadas por cuatro evaluadores independientes. Los evaluadores cegados revisaron en un ejercicio de tres pasos la resonancia nuclear magnética (RNM) de sacroilíacas sola, la resonancia nuclear magnética de columna sola, durante 6 meses, y registraron la presencia o ausencia de espondiloartritis. Posteriormente en otro intervalo de 1-12 meses, se evaluó en un tercer paso de forma simultánea los dos estudios. Los pacientes fueron clasificados de acuerdo con el examen clínico y las radiografías de pelvis con

espondiloartritis no radiológica (n=50) y espondiloartritis anquilosante (n=33) o dolor de espalda no específico (n=47). Los autores reportan sobre los desenlaces de sensibilidad y especificidad.

El estudio de Poddubnyy 2013(4), fue conducido en Alemania con el objetivo de evaluar el rendimiento de la RNM en comparación con las radiografías convencionales para la detección de cambios estructurales crónicos en las articulaciones sacroilíacas (la presencia de esclerosis, erosiones y cambios en el espacio articular ) en pacientes con espondiloartritis axial (EspAax). El estudio incluyó 112 pacientes con diagnóstico definitivo de espondiloartritis (68 con espondilitis anquilosante y 44 con espondilitis axial no radiográfica). Todos los pacientes realizaron en el mismo momento la radiografía y la resonancia. A nivel de la articulación sacroilíaca se evaluó: la presencia de esclerosis, erosiones y cambios en el espacio articular. Los autores reportan sobre los desenlaces de sensibilidad, especificidad y acuerdo Kappa.

El estudio de Dougados, 2017, conocido como la cohorte DESIR (5) fue conducido en Francia con el objetivo de evaluar la proporción de pacientes que pasaron de tener espondiloartritis sin compromiso radiológico a tener EspAax con compromiso radiológico en 5 años de seguimiento. Incluyó 416 pacientes con diagnóstico reciente de EspAax. Todos los pacientes tuvieron radiografía de sacroilíacas y RNM de sacroilíacas al inicio del diagnóstico (basal), a los 2 y 5 años de seguimiento. Se comparó la sensibilidad de la radiografía de sacroilíacas con la RNM para determinar inflamación a nivel de las sacroilíacas y el daño estructural, producido en los diferentes momentos del seguimiento.

### **Precisión en el diagnóstico de espondiloartritis axial**

La calidad global de la evidencia para este desenlace fue calificada como “Baja” de acuerdo con la aproximación GRADE (2 estudios). La RNM de columna lumbar mostro una sensibilidad del 77% y especificidad del 77% al comparar el grupo de sujetos con espondilitis con los controles sanos. La RNM de columna lumbar mostro una sensibilidad del 40% y especificidad del 88% al comparar el grupo de sujetos con espondilitis con el grupo de sujetos con dolor lumbar inflamatorio. La RNM de sacroilíacas mostró sensibilidad de 85% (IC95% 76 92) y especificidad del 93% (IC95% 84 97) al comparar el grupo de sujetos con espondilitis con los controles sanos.

### **Presencia de sacroileítis radiológica**

Solo un estudio (5) reportó sobre éste desenlace y mostro que la radiografía de sacroilíacas es un estudio con pobre sensibilidad y precisión diagnóstica en estadios tempranos o de sospecha de la enfermedad. La sacroileítis radiológica definida por los criterios de New York fue evidente en solo el 13.5% de 684 pacientes entre los 18-50 años con síntomas de dolor lumbar inflamatorio de menos de 3 años de evolución.

### **Cambios inflamatorios agudos**

El estudio de Weber en 2014 (3) para el grupo de sujetos con dolor de espalda clasificado con los criterios de Calín, reporta análisis independientes para dos cohortes definidas por diferencias en la exposición tanto en tiempo como en gravedad el dolor lumbar entre los pacientes (cohortes A y B). Se encontró que de los pacientes con espondiloartritis no radiológica, 76.3% en la cohorte A y 46% en la B, fueron correctamente clasificados como pacientes con espondiloartritis por la RNM de sacroilíacas y 51.3% en la cohorte A y 48.8% en la cohorte B por la RNM de columna lumbar. La

combinación de los dos estudios (RNM de sacroilíacas y de columna lumbar) incrementó la tasa de detección entre los pacientes con espondiloartritis no radiológica a 89.5% en la cohorte A y 67.7%, en la cohorte B, lo cual aumenta la confianza en el diagnóstico comparado con la aproximación convencional de realizar la RNM de sacroilíacas sola.

En los grupos de sujetos con diagnóstico de espondilitis establecida por los criterios de New York modificados (8) como patrón de oro comparado con controles sin dolor de espalda, los valores de sensibilidad y especificidad de la RNM fueron:

para el edema de medula ósea: sensibilidad 85% y especificidad 93%,

infiltración grasa: sensibilidad de 91% y especificidad de 86%,

evaluación global: sensibilidad de 99% y especificidad 96%

Para el grupo de dolor inflamatorio lumbar la sensibilidad y la especificidad al compararlo con controles sin dolor de espalda fueron:

edema de medula ósea: sensibilidad de 67% y especificidad de 93%

infiltración grasa: sensibilidad de 37% y la especificidad de 86%.

### **Cambios estructurales crónicos**

Este desenlace fue reportado por dos estudios Poddubnyy 2013(4) y Weber 2014 (3).

En el estudio de Poddubnyy 2013(4), la RNM mostro una sensibilidad del 84% y especificidad del 61% para la detección de cambios crónicos de sacroileítis. Se encontró que el acuerdo entre los dos estudios (RNM en comparación con las radiografías convencionales) evaluado por la prueba de Kappa de Cohen fue:

respecto a erosiones: bajo ( $k=0.11$ ),

para esclerosis subcondral: moderado ( $k=0.41$ )

anquilosis de las articulaciones: alto ( $k=0.85$ ).

El estudio de Weber 2014 (3), en sujetos con diagnóstico de espondilitis establecida por los criterios de New York modificados como patrón de oro, comparado con controles sin dolor de espalda, encontró:

Para erosiones una sensibilidad de 91% y especificidad 98%,

Para aquílosis una sensibilidad de 27% y especificidad de 100%

En el grupo de dolor inflamatorio lumbar, compararlo con controles sin dolor de espalda, encontró:

Para erosiones: sensibilidad de 48% y especificidad de 98%,

## Conclusión de la evidencia

La evidencia descrita permite documentar el valor diagnóstico de la RNM de columna y de articulación sacroilíaca para detectar de forma temprana cambios inflamatorios agudos que se encuentran en los estadios iniciales de la enfermedad.

Se destaca el buen desempeño de la RNM para la detección de alteraciones estructurales comparado con la radiografía convencional de sacroilíacas.

Adicionalmente como se describió en las cohortes de seguimiento, la aparición de cambios estructurales en la radiografía aparece solo en un 13.5% de los pacientes con dolor lumbar de 3 años de evolución, por lo que cobra más importancia la RNM de forma temprana en pacientes con enfermedad de pocos años de duración y jóvenes.

Es importante tener en cuenta que se dispone de pocos estudios de buena calidad, por lo que la evidencia global es de baja calidad  $\oplus\oplus\bigcirc\bigcirc$ , (ver apéndice 1 tabla SoF\_GRADE) lo que significa que la probabilidad de que el efecto sea sustancialmente diferente es alta.

Figura 1. Matriz de evidencia

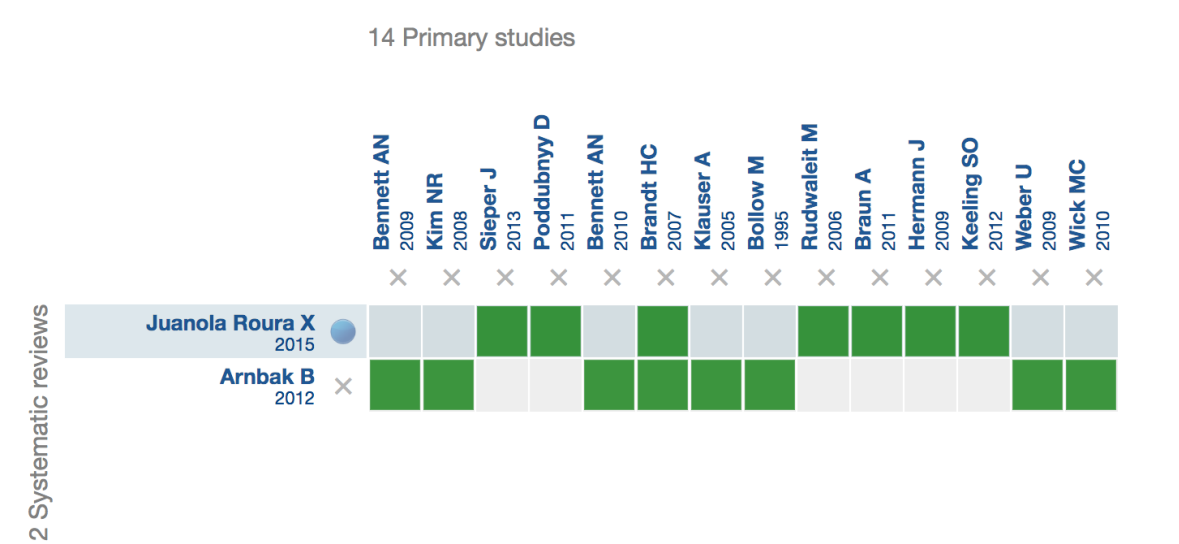

Matriz generada en Epistemónikos <https://www.epistemonikos.org/en/> Enlace a la matriz evidencia viva:  
<https://www.epistemonikos.org/en/documents/7a7d801d8d01992c6e9e670fac6f09004e5322bf/matrix?current=5e00713a7db23a1c51f5d2c5>

Preferencia de pacientes

No se identificaron estudios que evalúen las preferencias de los pacientes sobre el uso de estas pruebas en el diagnóstico de la espondiloartritis axial.

Sin embargo, es de prever que toda técnica que permita identificar tempranamente la enfermedad para poder dar inicio temprano a terapias de primera línea que controlen el dolor y modifiquen el pronóstico de la enfermedad, será la preferida por los pacientes.

Recursos requeridos y costos

No se identificaron estudios realizados en Colombia, ni publicados recientemente. Se identificó estudio de costo-efectividad realizado en Estados Unidos y presentado como poster en congreso científico en el 2019 (13), comparó la radiografía de sacro-iliacas con la RNM para detectar sacroileitis en el diagnóstico inicial de la EspAax. Se realizó un modelo de decisión analítica desde la perspectiva del sistema de salud en pacientes con dolor lumbar inflamatorio sugestivo de EspAax, comparando tres estrategias de diagnóstico, en un horizonte de tiempo a 3 años. El desenlace de efectividad primaria fue los años de vida ajustado por calidad (AVACs) y el límite de disposición a pagar se estableció en USD\$ 100,000 / AVAC (dólares estadounidenses de 2018).

La radiografía fue la estrategia dominante, ya que fue la opción menos costosa (\$64,782 dólares americanos 2018) y más efectiva (2,43 AVAC) durante un curso de 3 años. No se encontró que las estrategias basadas en MRI y radiografías/ MRI fueran opciones de imagen rentables para esta población de pacientes. El análisis de sensibilidad unidireccional demostró que la radiografía fue

favorecida sobre las otras dos estrategias de imagen en una amplia gama de costos y probabilidades razonables.

### **Aceptabilidad de la opción a recomendar**

De acuerdo con las recomendaciones de la European League Against Rheumatism (EULAR) actuales(14), la radiografía de la articulación sacro ilíaca es la primera técnica de imagen para el diagnóstico de la sacroileítis asociada a la espondiloartritis axial. Las recomendaciones de la EULAR, indican la realización de RNM en pacientes jóvenes o con síntomas de corta duración y como una alternativa a la radiografía como primer método de imagen para el diagnóstico temprano de la espondiloartritis axial en este grupo de población.

Las guías NICE (15) recomiendan realizar radiografía de las articulaciones sacroilíacas en pacientes en los que se sospeche espondiloartritis axial, a no ser que el paciente tenga un esqueleto inmaduro.

## DE LA EVIDENCIA A LAS DECISIONES (EtD)

| PREGUNTA               |                                                   |
|------------------------|---------------------------------------------------|
| POBLACION              | Pacientes con sospecha de espondiloartritis axial |
| INTERVENCIÓN           | Resonancia Magnética nuclear (RNM)                |
| COMPARACIÓN            | Radiografía de columna                            |
| DESENLACES PRINCIPALES | Diagnóstico de espondiloartritis axial            |
| ÁMBITO                 | Ambulatorio                                       |
| PERSPECTIVA            | Del grupo desarrollador de la Guía                |
| CONFLICTO DE INTERÉS:  | No se manifestó ningún conflicto de interés       |

## Evaluación

| Problema ¿Es el problema una prioridad?                                                                                                                                                                                        |                                                                                                                                                                                                                                                                                                                                                                                                                                                                                                                                                                                                                                                                                                                                                                                                 |                             |
|--------------------------------------------------------------------------------------------------------------------------------------------------------------------------------------------------------------------------------|-------------------------------------------------------------------------------------------------------------------------------------------------------------------------------------------------------------------------------------------------------------------------------------------------------------------------------------------------------------------------------------------------------------------------------------------------------------------------------------------------------------------------------------------------------------------------------------------------------------------------------------------------------------------------------------------------------------------------------------------------------------------------------------------------|-----------------------------|
| JUICIO                                                                                                                                                                                                                         | EVIDENCIA DE LA INVESTIGACION                                                                                                                                                                                                                                                                                                                                                                                                                                                                                                                                                                                                                                                                                                                                                                   | CONSIDERACIONES ADICIONALES |
| <input type="radio"/> No<br><input type="radio"/> Probablemente No<br><input type="radio"/> Probablemente Si<br><input checked="" type="radio"/> Si<br><input type="radio"/> Es variable<br><input type="radio"/> No se conoce | <p>La espondiloartritis es una entidad con una prevalencia estimada entre el 0.1-2.5% de la población, su incidencia se estima desde los 0.84 casos a 77 casos por cada habitante/año, lo cual sumado a que un número considerable de pacientes desarrollan una enfermedad incapacitante, con deterioro de la capacidad funcional y la calidad de vida (12), dando lugar a pérdida de la capacidad productiva. Es por eso por lo que la detección temprana de la enfermedad y así mismo el inicio temprano del tratamiento es de gran importancia, dada la historia natural de la enfermedad las lesiones no aparecen de forma temprana en la radiografía convencional, por ello la actual pregunta busca responder como incluir en la práctica clínica métodos de detección más tempranos.</p> |                             |



## Efectos deseables (beneficios de la opción a recomendar)

¿Qué tan sustanciales son los efectos deseables de la opción?

| JUICIO                                                                                                                                                | EVIDENCIA DE LA INVESTIGACION                                                                                                                                                                                                                                                                                                                                                                                          |  |  |  |  |  |  |  | CONSIDERACIONES ADICIONALES |
|-------------------------------------------------------------------------------------------------------------------------------------------------------|------------------------------------------------------------------------------------------------------------------------------------------------------------------------------------------------------------------------------------------------------------------------------------------------------------------------------------------------------------------------------------------------------------------------|--|--|--|--|--|--|--|-----------------------------|
| <div><div><div>○ Triviales</div><div>○ Pequeños</div><div>○ Moderados</div><div>○ Grandes</div><div>○ Varían</div><div>○ No se sabe</div></div></div> | <div><div>Pregunta: ¿Debería usarse Resonancia nuclear Magnética de sacroilíacas en vez de Rx de sacroilíacas para diagnosticar Espondiloartritis axial en dolor inflamatorio crónico?</div><div><div><div><div>Sensibilidad</div><div>0.67 (95% CI: 0.48 a 0.81)</div></div><div><div>Especificidad</div><div>0.93 (95% CI: 0.84 a 0.97)</div></div></div><div><div>Prevalencias</div><div>1%</div></div></div></div> |  |  |  |  |  |  |  |                             |
|                                                                                                                                                       |                                                                                                                                                                                                                                                                                                                                                                                                                        |  |  |  |  |  |  |  |                             |
|                                                                                                                                                       |                                                                                                                                                                                                                                                                                                                                                                                                                        |  |  |  |  |  |  |  |                             |
|                                                                                                                                                       |                                                                                                                                                                                                                                                                                                                                                                                                                        |  |  |  |  |  |  |  |                             |
|                                                                                                                                                       |                                                                                                                                                                                                                                                                                                                                                                                                                        |  |  |  |  |  |  |  |                             |
|                                                                                                                                                       |                                                                                                                                                                                                                                                                                                                                                                                                                        |  |  |  |  |  |  |  |                             |
|                                                                                                                                                       |                                                                                                                                                                                                                                                                                                                                                                                                                        |  |  |  |  |  |  |  |                             |
|                                                                                                                                                       |                                                                                                                                                                                                                                                                                                                                                                                                                        |  |  |  |  |  |  |  |                             |
|                                                                                                                                                       |                                                                                                                                                                                                                                                                                                                                                                                                                        |  |  |  |  |  |  |  |                             |
|                                                                                                                                                       |                                                                                                                                                                                                                                                                                                                                                                                                                        |  |  |  |  |  |  |  |                             |
|                                                                                                                                                       |                                                                                                                                                                                                                                                                                                                                                                                                                        |  |  |  |  |  |  |  |                             |
|                                                                                                                                                       |                                                                                                                                                                                                                                                                                                                                                                                                                        |  |  |  |  |  |  |  |                             |
|                                                                                                                                                       |                                                                                                                                                                                                                                                                                                                                                                                                                        |  |  |  |  |  |  |  |                             |
|                                                                                                                                                       |                                                                                                                                                                                                                                                                                                                                                                                                                        |  |  |  |  |  |  |  |                             |
|                                                                                                                                                       |                                                                                                                                                                                                                                                                                                                                                                                                                        |  |  |  |  |  |  |  |                             |
|                                                                                                                                                       |                                                                                                                                                                                                                                                                                                                                                                                                                        |  |  |  |  |  |  |  |                             |
|                                                                                                                                                       |                                                                                                                                                                                                                                                                                                                                                                                                                        |  |  |  |  |  |  |  |                             |
|                                                                                                                                                       |                                                                                                                                                                                                                                                                                                                                                                                                                        |  |  |  |  |  |  |  |                             |
|                                                                                                                                                       |                                                                                                                                                                                                                                                                                                                                                                                                                        |  |  |  |  |  |  |  |                             |
|                                                                                                                                                       |                                                                                                                                                                                                                                                                                                                                                                                                                        |  |  |  |  |  |  |  |                             |
|                                                                                                                                                       |                                                                                                                                                                                                                                                                                                                                                                                                                        |  |  |  |  |  |  |  |                             |
|                                                                                                                                                       |                                                                                                                                                                                                                                                                                                                                                                                                                        |  |  |  |  |  |  |  |                             |
|                                                                                                                                                       |                                                                                                                                                                                                                                                                                                                                                                                                                        |  |  |  |  |  |  |  |                             |
|                                                                                                                                                       |                                                                                                                                                                                                                                                                                                                                                                                                                        |  |  |  |  |  |  |  |                             |
|                                                                                                                                                       |                                                                                                                                                                                                                                                                                                                                                                                                                        |  |  |  |  |  |  |  |                             |
|                                                                                                                                                       |                                                                                                                                                                                                                                                                                                                                                                                                                        |  |  |  |  |  |  |  |                             |
|                                                                                                                                                       |                                                                                                                                                                                                                                                                                                                                                                                                                        |  |  |  |  |  |  |  |                             |
|                                                                                                                                                       |                                                                                                                                                                                                                                                                                                                                                                                                                        |  |  |  |  |  |  |  |                             |
|                                                                                                                                                       |                                                                                                                                                                                                                                                                                                                                                                                                                        |  |  |  |  |  |  |  |                             |
|                                                                                                                                                       |                                                                                                                                                                                                                                                                                                                                                                                                                        |  |  |  |  |  |  |  |                             |
|                                                                                                                                                       |                                                                                                                                                                                                                                                                                                                                                                                                                        |  |  |  |  |  |  |  |                             |
|                                                                                                                                                       |                                                                                                                                                                                                                                                                                                                                                                                                                        |  |  |  |  |  |  |  |                             |
|                                                                                                                                                       |                                                                                                                                                                                                                                                                                                                                                                                                                        |  |  |  |  |  |  |  |                             |
|                                                                                                                                                       |                                                                                                                                                                                                                                                                                                                                                                                                                        |  |  |  |  |  |  |  |                             |
|                                                                                                                                                       |                                                                                                                                                                                                                                                                                                                                                                                                                        |  |  |  |  |  |  |  |                             |
|                                                                                                                                                       |                                                                                                                                                                                                                                                                                                                                                                                                                        |  |  |  |  |  |  |  |                             |
|                                                                                                                                                       |                                                                                                                                                                                                                                                                                                                                                                                                                        |  |  |  |  |  |  |  |                             |
|                                                                                                                                                       |                                                                                                                                                                                                                                                                                                                                                                                                                        |  |  |  |  |  |  |  |                             |
|                                                                                                                                                       |                                                                                                                                                                                                                                                                                                                                                                                                                        |  |  |  |  |  |  |  |                             |
|                                                                                                                                                       |                                                                                                                                                                                                                                                                                                                                                                                                                        |  |  |  |  |  |  |  |                             |
|                                                                                                                                                       |                                                                                                                                                                                                                                                                                                                                                                                                                        |  |  |  |  |  |  |  |                             |
|                                                                                                                                                       |                                                                                                                                                                                                                                                                                                                                                                                                                        |  |  |  |  |  |  |  |                             |
|                                                                                                                                                       |                                                                                                                                                                                                                                                                                                                                                                                                                        |  |  |  |  |  |  |  |                             |
|                                                                                                                                                       |                                                                                                                                                                                                                                                                                                                                                                                                                        |  |  |  |  |  |  |  |                             |
|                                                                                                                                                       |                                                                                                                                                                                                                                                                                                                                                                                                                        |  |  |  |  |  |  |  |                             |
|                                                                                                                                                       |                                                                                                                                                                                                                                                                                                                                                                                                                        |  |  |  |  |  |  |  |                             |
|                                                                                                                                                       |                                                                                                                                                                                                                                                                                                                                                                                                                        |  |  |  |  |  |  |  |                             |
|                                                                                                                                                       |                                                                                                                                                                                                                                                                                                                                                                                                                        |  |  |  |  |  |  |  |                             |
|                                                                                                                                                       |                                                                                                                                                                                                                                                                                                                                                                                                                        |  |  |  |  |  |  |  |                             |
|                                                                                                                                                       |                                                                                                                                                                                                                                                                                                                                                                                                                        |  |  |  |  |  |  |  |                             |
|                                                                                                                                                       |                                                                                                                                                                                                                                                                                                                                                                                                                        |  |  |  |  |  |  |  |                             |
|                                                                                                                                                       |                                                                                                                                                                                                                                                                                                                                                                                                                        |  |  |  |  |  |  |  |                             |
|                                                                                                                                                       |                                                                                                                                                                                                                                                                                                                                                                                                                        |  |  |  |  |  |  |  |                             |
|                                                                                                                                                       |                                                                                                                                                                                                                                                                                                                                                                                                                        |  |  |  |  |  |  |  |                             |
|                                                                                                                                                       |                                                                                                                                                                                                                                                                                                                                                                                                                        |  |  |  |  |  |  |  |                             |
|                                                                                                                                                       |                                                                                                                                                                                                                                                                                                                                                                                                                        |  |  |  |  |  |  |  |                             |
|                                                                                                                                                       |                                                                                                                                                                                                                                                                                                                                                                                                                        |  |  |  |  |  |  |  |                             |
|                                                                                                                                                       |                                                                                                                                                                                                                                                                                                                                                                                                                        |  |  |  |  |  |  |  |                             |
|                                                                                                                                                       |                                                                                                                                                                                                                                                                                                                                                                                                                        |  |  |  |  |  |  |  |                             |
|                                                                                                                                                       |                                                                                                                                                                                                                                                                                                                                                                                                                        |  |  |  |  |  |  |  |                             |
|                                                                                                                                                       |                                                                                                                                                                                                                                                                                                                                                                                                                        |  |  |  |  |  |  |  |                             |
|                                                                                                                                                       |                                                                                                                                                                                                                                                                                                                                                                                                                        |  |  |  |  |  |  |  |                             |
|                                                                                                                                                       |                                                                                                                                                                                                                                                                                                                                                                                                                        |  |  |  |  |  |  |  |                             |
|                                                                                                                                                       |                                                                                                                                                                                                                                                                                                                                                                                                                        |  |  |  |  |  |  |  |                             |
|                                                                                                                                                       |                                                                                                                                                                                                                                                                                                                                                                                                                        |  |  |  |  |  |  |  |                             |
|                                                                                                                                                       |                                                                                                                                                                                                                                                                                                                                                                                                                        |  |  |  |  |  |  |  |                             |
|                                                                                                                                                       |                                                                                                                                                                                                                                                                                                                                                                                                                        |  |  |  |  |  |  |  |                             |
|                                                                                                                                                       |                                                                                                                                                                                                                                                                                                                                                                                                                        |  |  |  |  |  |  |  |                             |
|                                                                                                                                                       |                                                                                                                                                                                                                                                                                                                                                                                                                        |  |  |  |  |  |  |  |                             |
|                                                                                                                                                       |                                                                                                                                                                                                                                                                                                                                                                                                                        |  |  |  |  |  |  |  |                             |
|                                                                                                                                                       |                                                                                                                                                                                                                                                                                                                                                                                                                        |  |  |  |  |  |  |  |                             |
|                                                                                                                                                       |                                                                                                                                                                                                                                                                                                                                                                                                                        |  |  |  |  |  |  |  |                             |
|                                                                                                                                                       |                                                                                                                                                                                                                                                                                                                                                                                                                        |  |  |  |  |  |  |  |                             |
|                                                                                                                                                       |                                                                                                                                                                                                                                                                                                                                                                                                                        |  |  |  |  |  |  |  |                             |
|                                                                                                                                                       |                                                                                                                                                                                                                                                                                                                                                                                                                        |  |  |  |  |  |  |  |                             |
|                                                                                                                                                       |                                                                                                                                                                                                                                                                                                                                                                                                                        |  |  |  |  |  |  |  |                             |
|                                                                                                                                                       |                                                                                                                                                                                                                                                                                                                                                                                                                        |  |  |  |  |  |  |  |                             |
|                                                                                                                                                       |                                                                                                                                                                                                                                                                                                                                                                                                                        |  |  |  |  |  |  |  |                             |
|                                                                                                                                                       |                                                                                                                                                                                                                                                                                                                                                                                                                        |  |  |  |  |  |  |  |                             |
|                                                                                                                                                       |                                                                                                                                                                                                                                                                                                                                                                                                                        |  |  |  |  |  |  |  |                             |
|                                                                                                                                                       |                                                                                                                                                                                                                                                                                                                                                                                                                        |  |  |  |  |  |  |  |                             |
|                                                                                                                                                       |                                                                                                                                                                                                                                                                                                                                                                                                                        |  |  |  |  |  |  |  |                             |
|                                                                                                                                                       |                                                                                                                                                                                                                                                                                                                                                                                                                        |  |  |  |  |  |  |  |                             |
|                                                                                                                                                       |                                                                                                                                                                                                                                                                                                                                                                                                                        |  |  |  |  |  |  |  |                             |
|                                                                                                                                                       |                                                                                                                                                                                                                                                                                                                                                                                                                        |  |  |  |  |  |  |  |                             |
|                                                                                                                                                       |                                                                                                                                                                                                                                                                                                                                                                                                                        |  |  |  |  |  |  |  |                             |
|                                                                                                                                                       |                                                                                                                                                                                                                                                                                                                                                                                                                        |  |  |  |  |  |  |  |                             |
|                                                                                                                                                       |                                                                                                                                                                                                                                                                                                                                                                                                                        |  |  |  |  |  |  |  |                             |
|                                                                                                                                                       |                                                                                                                                                                                                                                                                                                                                                                                                                        |  |  |  |  |  |  |  |                             |
|                                                                                                                                                       |                                                                                                                                                                                                                                                                                                                                                                                                                        |  |  |  |  |  |  |  |                             |
|                                                                                                                                                       |                                                                                                                                                                                                                                                                                                                                                                                                                        |  |  |  |  |  |  |  |                             |
|                                                                                                                                                       |                                                                                                                                                                                                                                                                                                                                                                                                                        |  |  |  |  |  |  |  |                             |
|                                                                                                                                                       |                                                                                                                                                                                                                                                                                                                                                                                                                        |  |  |  |  |  |  |  |                             |
|                                                                                                                                                       |                                                                                                                                                                                                                                                                                                                                                                                                                        |  |  |  |  |  |  |  |                             |
|                                                                                                                                                       |                                                                                                                                                                                                                                                                                                                                                                                                                        |  |  |  |  |  |  |  |                             |
|                                                                                                                                                       |                                                                                                                                                                                                                                                                                                                                                                                                                        |  |  |  |  |  |  |  |                             |
|                                                                                                                                                       |                                                                                                                                                                                                                                                                                                                                                                                                                        |  |  |  |  |  |  |  |                             |
|                                                                                                                                                       |                                                                                                                                                                                                                                                                                                                                                                                                                        |  |  |  |  |  |  |  |                             |
|                                                                                                                                                       |                                                                                                                                                                                                                                                                                                                                                                                                                        |  |  |  |  |  |  |  |                             |
|                                                                                                                                                       |                                                                                                                                                                                                                                                                                                                                                                                                                        |  |  |  |  |  |  |  |                             |
|                                                                                                                                                       |                                                                                                                                                                                                                                                                                                                                                                                                                        |  |  |  |  |  |  |  |                             |
|                                                                                                                                                       |                                                                                                                                                                                                                                                                                                                                                                                                                        |  |  |  |  |  |  |  |                             |
|                                                                                                                                                       |                                                                                                                                                                                                                                                                                                                                                                                                                        |  |  |  |  |  |  |  |                             |
|                                                                                                                                                       |                                                                                                                                                                                                                                                                                                                                                                                                                        |  |  |  |  |  |  |  |                             |
|                                                                                                                                                       |                                                                                                                                                                                                                                                                                                                                                                                                                        |  |  |  |  |  |  |  |                             |
|                                                                                                                                                       |                                                                                                                                                                                                                                                                                                                                                                                                                        |  |  |  |  |  |  |  |                             |
|                                                                                                                                                       |                                                                                                                                                                                                                                                                                                                                                                                                                        |  |  |  |  |  |  |  |                             |
|                                                                                                                                                       |                                                                                                                                                                                                                                                                                                                                                                                                                        |  |  |  |  |  |  |  |                             |
|                                                                                                                                                       |                                                                                                                                                                                                                                                                                                                                                                                                                        |  |  |  |  |  |  |  |                             |
|                                                                                                                                                       |                                                                                                                                                                                                                                                                                                                                                                                                                        |  |  |  |  |  |  |  |                             |
|                                                                                                                                                       |                                                                                                                                                                                                                                                                                                                                                                                                                        |  |  |  |  |  |  |  |                             |
|                                                                                                                                                       |                                                                                                                                                                                                                                                                                                                                                                                                                        |  |  |  |  |  |  |  |                             |
|                                                                                                                                                       |                                                                                                                                                                                                                                                                                                                                                                                                                        |  |  |  |  |  |  |  |                             |
|                                                                                                                                                       |                                                                                                                                                                                                                                                                                                                                                                                                                        |  |  |  |  |  |  |  |                             |
|                                                                                                                                                       |                                                                                                                                                                                                                                                                                                                                                                                                                        |  |  |  |  |  |  |  |                             |
|                                                                                                                                                       |                                                                                                                                                                                                                                                                                                                                                                                                                        |  |  |  |  |  |  |  |                             |
|                                                                                                                                                       |                                                                                                                                                                                                                                                                                                                                                                                                                        |  |  |  |  |  |  |  |                             |
|                                                                                                                                                       |                                                                                                                                                                                                                                                                                                                                                                                                                        |  |  |  |  |  |  |  |                             |
|                                                                                                                                                       |                                                                                                                                                                                                                                                                                                                                                                                                                        |  |  |  |  |  |  |  |                             |
|                                                                                                                                                       |                                                                                                                                                                                                                                                                                                                                                                                                                        |  |  |  |  |  |  |  |                             |
|                                                                                                                                                       |                                                                                                                                                                                                                                                                                                                                                                                                                        |  |  |  |  |  |  |  |                             |
|                                                                                                                                                       |                                                                                                                                                                                                                                                                                                                                                                                                                        |  |  |  |  |  |  |  |                             |
|                                                                                                                                                       |                                                                                                                                                                                                                                                                                                                                                                                                                        |  |  |  |  |  |  |  |                             |
|                                                                                                                                                       |                                                                                                                                                                                                                                                                                                                                                                                                                        |  |  |  |  |  |  |  |                             |
|                                                                                                                                                       |                                                                                                                                                                                                                                                                                                                                                                                                                        |  |  |  |  |  |  |  |                             |
|                                                                                                                                                       |                                                                                                                                                                                                                                                                                                                                                                                                                        |  |  |  |  |  |  |  |                             |
|                                                                                                                                                       |                                                                                                                                                                                                                                                                                                                                                                                                                        |  |  |  |  |  |  |  |                             |
|                                                                                                                                                       |                                                                                                                                                                                                                                                                                                                                                                                                                        |  |  |  |  |  |  |  |                             |
|                                                                                                                                                       |                                                                                                                                                                                                                                                                                                                                                                                                                        |  |  |  |  |  |  |  |                             |
|                                                                                                                                                       |                                                                                                                                                                                                                                                                                                                                                                                                                        |  |  |  |  |  |  |  |                             |
|                                                                                                                                                       |                                                                                                                                                                                                                                                                                                                                                                                                                        |  |  |  |  |  |  |  |                             |
|                                                                                                                                                       |                                                                                                                                                                                                                                                                                                                                                                                                                        |  |  |  |  |  |  |  |                             |
|                                                                                                                                                       |                                                                                                                                                                                                                                                                                                                                                                                                                        |  |  |  |  |  |  |  |                             |
|                                                                                                                                                       |                                                                                                                                                                                                                                                                                                                                                                                                                        |  |  |  |  |  |  |  |                             |
|                                                                                                                                                       |                                                                                                                                                                                                                                                                                                                                                                                                                        |  |  |  |  |  |  |  |                             |
|                                                                                                                                                       |                                                                                                                                                                                                                                                                                                                                                                                                                        |  |  |  |  |  |  |  |                             |
|                                                                                                                                                       |                                                                                                                                                                                                                                                                                                                                                                                                                        |  |  |  |  |  |  |  |                             |
|                                                                                                                                                       |                                                                                                                                                                                                                                                                                                                                                                                                                        |  |  |  |  |  |  |  |                             |
|                                                                                                                                                       |                                                                                                                                                                                                                                                                                                                                                                                                                        |  |  |  |  |  |  |  |                             |
|                                                                                                                                                       |                                                                                                                                                                                                                                                                                                                                                                                                                        |  |  |  |  |  |  |  |                             |
|                                                                                                                                                       |                                                                                                                                                                                                                                                                                                                                                                                                                        |  |  |  |  |  |  |  |                             |
|                                                                                                                                                       |                                                                                                                                                                                                                                                                                                                                                                                                                        |  |  |  |  |  |  |  |                             |
|                                                                                                                                                       |                                                                                                                                                                                                                                                                                                                                                                                                                        |  |  |  |  |  |  |  |                             |
|                                                                                                                                                       |                                                                                                                                                                                                                                                                                                                                                                                                                        |  |  |  |  |  |  |  |                             |
|                                                                                                                                                       |                                                                                                                                                                                                                                                                                                                                                                                                                        |  |  |  |  |  |  |  |                             |
|                                                                                                                                                       |                                                                                                                                                                                                                                                                                                                                                                                                                        |  |  |  |  |  |  |  |                             |
|                                                                                                                                                       |                                                                                                                                                                                                                                                                                                                                                                                                                        |  |  |  |  |  |  |  |                             |
|                                                                                                                                                       |                                                                                                                                                                                                                                                                                                                                                                                                                        |  |  |  |  |  |  |  |                             |
|                                                                                                                                                       |                                                                                                                                                                                                                                                                                                                                                                                                                        |  |  |  |  |  |  |  |                             |
|                                                                                                                                                       |                                                                                                                                                                                                                                                                                                                                                                                                                        |  |  |  |  |  |  |  |                             |
|                                                                                                                                                       |                                                                                                                                                                                                                                                                                                                                                                                                                        |  |  |  |  |  |  |  |                             |
|                                                                                                                                                       |                                                                                                                                                                                                                                                                                                                                                                                                                        |  |  |  |  |  |  |  |                             |
|                                                                                                                                                       |                                                                                                                                                                                                                                                                                                                                                                                                                        |  |  |  |  |  |  |  |                             |
|                                                                                                                                                       |                                                                                                                                                                                                                                                                                                                                                                                                                        |  |  |  |  |  |  |  |                             |
|                                                                                                                                                       |                                                                                                                                                                                                                                                                                                                                                                                                                        |  |  |  |  |  |  |  |                             |
|                                                                                                                                                       |                                                                                                                                                                                                                                                                                                                                                                                                                        |  |  |  |  |  |  |  |                             |
|                                                                                                                                                       |                                                                                                                                                                                                                                                                                                                                                                                                                        |  |  |  |  |  |  |  |                             |
|                                                                                                                                                       |                                                                                                                                                                                                                                                                                                                                                                                                                        |  |  |  |  |  |  |  |                             |
|                                                                                                                                                       |                                                                                                                                                                                                                                                                                                                                                                                                                        |  |  |  |  |  |  |  |                             |
|                                                                                                                                                       |                                                                                                                                                                                                                                                                                                                                                                                                                        |  |  |  |  |  |  |  |                             |
|                                                                                                                                                       |                                                                                                                                                                                                                                                                                                                                                                                                                        |  |  |  |  |  |  |  |                             |
|                                                                                                                                                       |                                                                                                                                                                                                                                                                                                                                                                                                                        |  |  |  |  |  |  |  |                             |
|                                                                                                                                                       |                                                                                                                                                                                                                                                                                                                                                                                                                        |  |  |  |  |  |  |  |                             |
|                                                                                                                                                       |                                                                                                                                                                                                                                                                                                                                                                                                                        |  |  |  |  |  |  |  |                             |
|                                                                                                                                                       |                                                                                                                                                                                                                                                                                                                                                                                                                        |  |  |  |  |  |  |  |                             |
|                                                                                                                                                       |                                                                                                                                                                                                                                                                                                                                                                                                                        |  |  |  |  |  |  |  |                             |
|                                                                                                                                                       |                                                                                                                                                                                                                                                                                                                                                                                                                        |  |  |  |  |  |  |  |                             |
|                                                                                                                                                       |                                                                                                                                                                                                                                                                                                                                                                                                                        |  |  |  |  |  |  |  |                             |
|                                                                                                                                                       |                                                                                                                                                                                                                                                                                                                                                                                                                        |  |  |  |  |  |  |  |                             |
|                                                                                                                                                       |                                                                                                                                                                                                                                                                                                                                                                                                                        |  |  |  |  |  |  |  |                             |
|                                                                                                                                                       |                                                                                                                                                                                                                                                                                                                                                                                                                        |  |  |  |  |  |  |  |                             |
|                                                                                                                                                       |                                                                                                                                                                                                                                                                                                                                                                                                                        |  |  |  |  |  |  |  |                             |
|                                                                                                                                                       |                                                                                                                                                                                                                                                                                                                                                                                                                        |  |  |  |  |  |  |  |                             |
|                                                                                                                                                       |                                                                                                                                                                                                                                                                                                                                                                                                                        |  |  |  |  |  |  |  |                             |
|                                                                                                                                                       |                                                                                                                                                                                                                                                                                                                                                                                                                        |  |  |  |  |  |  |  |                             |
|                                                                                                                                                       |                                                                                                                                                                                                                                                                                                                                                                                                                        |  |  |  |  |  |  |  |                             |
|                                                                                                                                                       |                                                                                                                                                                                                                                                                                                                                                                                                                        |  |  |  |  |  |  |  |                             |
|                                                                                                                                                       |                                                                                                                                                                                                                                                                                                                                                                                                                        |  |  |  |  |  |  |  |                             |
|                                                                                                                                                       |                                                                                                                                                                                                                                                                                                                                                                                                                        |  |  |  |  |  |  |  |                             |
|                                                                                                                                                       |                                                                                                                                                                                                                                                                                                                                                                                                                        |  |  |  |  |  |  |  |                             |
|                                                                                                                                                       |                                                                                                                                                                                                                                                                                                                                                                                                                        |  |  |  |  |  |  |  |                             |
|                                                                                                                                                       |                                                                                                                                                                                                                                                                                                                                                                                                                        |  |  |  |  |  |  |  |                             |
|                                                                                                                                                       |                                                                                                                                                                                                                                                                                                                                                                                                                        |  |  |  |  |  |  |  |                             |
|                                                                                                                                                       |                                                                                                                                                                                                                                                                                                                                                                                                                        |  |  |  |  |  |  |  |                             |
|                                                                                                                                                       |                                                                                                                                                                                                                                                                                                                                                                                                                        |  |  |  |  |  |  |  |                             |
|                                                                                                                                                       |                                                                                                                                                                                                                                                                                                                                                                                                                        |  |  |  |  |  |  |  |                             |
|                                                                                                                                                       |                                                                                                                                                                                                                                                                                                                                                                                                                        |  |  |  |  |  |  |  |                             |
|                                                                                                                                                       |                                                                                                                                                                                                                                                                                                                                                                                                                        |  |  |  |  |  |  |  |                             |
|                                                                                                                                                       |                                                                                                                                                                                                                                                                                                                                                                                                                        |  |  |  |  |  |  |  |                             |
|                                                                                                                                                       |                                                                                                                                                                                                                                                                                                                                                                                                                        |  |  |  |  |  |  |  |                             |
|                                                                                                                                                       |                                                                                                                                                                                                                                                                                                                                                                                                                        |  |  |  |  |  |  |  |                             |
|                                                                                                                                                       |                                                                                                                                                                                                                                                                                                                                                                                                                        |  |  |  |  |  |  |  |                             |
|                                                                                                                                                       |                                                                                                                                                                                                                                                                                                                                                                                                                        |  |  |  |  |  |  |  |                             |
|                                                                                                                                                       |                                                                                                                                                                                                                                                                                                                                                                                                                        |  |  |  |  |  |  |  |                             |
|                                                                                                                                                       |                                                                                                                                                                                                                                                                                                                                                                                                                        |  |  |  |  |  |  |  |                             |
|                                                                                                                                                       |                                                                                                                                                                                                                                                                                                                                                                                                                        |  |  |  |  |  |  |  |                             |
|                                                                                                                                                       |                                                                                                                                                                                                                                                                                                                                                                                                                        |  |  |  |  |  |  |  |                             |
|                                                                                                                                                       |                                                                                                                                                                                                                                                                                                                                                                                                                        |  |  |  |  |  |  |  |                             |
|                                                                                                                                                       |                                                                                                                                                                                                                                                                                                                                                                                                                        |  |  |  |  |  |  |  |                             |
|                                                                                                                                                       |                                                                                                                                                                                                                                                                                                                                                                                                                        |  |  |  |  |  |  |  |                             |
|                                                                                                                                                       |                                                                                                                                                                                                                                                                                                                                                                                                                        |  |  |  |  |  |  |  |                             |
|                                                                                                                                                       |                                                                                                                                                                                                                                                                                                                                                                                                                        |  |  |  |  |  |  |  |                             |
|                                                                                                                                                       |                                                                                                                                                                                                                                                                                                                                                                                                                        |  |  |  |  |  |  |  |                             |
|                                                                                                                                                       |                                                                                                                                                                                                                                                                                                                                                                                                                        |  |  |  |  |  |  |  |                             |
|                                                                                                                                                       |                                                                                                                                                                                                                                                                                                                                                                                                                        |  |  |  |  |  |  |  |                             |
|                                                                                                                                                       |                                                                                                                                                                                                                                                                                                                                                                                                                        |  |  |  |  |  |  |  |                             |
|                                                                                                                                                       |                                                                                                                                                                                                                                                                                                                                                                                                                        |  |  |  |  |  |  |  |                             |
|                                                                                                                                                       |                                                                                                                                                                                                                                                                                                                                                                                                                        |  |  |  |  |  |  |  |                             |
|                                                                                                                                                       |                                                                                                                                                                                                                                                                                                                                                                                                                        |  |  |  |  |  |  |  |                             |
|                                                                                                                                                       |                                                                                                                                                                                                                                                                                                                                                                                                                        |  |  |  |  |  |  |  |                             |
|                                                                                                                                                       |                                                                                                                                                                                                                                                                                                                                                                                                                        |  |  |  |  |  |  |  |                             |
|                                                                                                                                                       |                                                                                                                                                                                                                                                                                                                                                                                                                        |  |  |  |  |  |  |  |                             |
|                                                                                                                                                       |                                                                                                                                                                                                                                                                                                                                                                                                                        |  |  |  |  |  |  |  |                             |
|                                                                                                                                                       |                                                                                                                                                                                                                                                                                                                                                                                                                        |  |  |  |  |  |  |  |                             |
|                                                                                                                                                       |                                                                                                                                                                                                                                                                                                                                                                                                                        |  |  |  |  |  |  |  |                             |
|                                                                                                                                                       |                                                                                                                                                                                                                                                                                                                                                                                                                        |  |  |  |  |  |  |  |                             |
|                                                                                                                                                       |                                                                                                                                                                                                                                                                                                                                                                                                                        |  |  |  |  |  |  |  |                             |
|                                                                                                                                                       |                                                                                                                                                                                                                                                                                                                                                                                                                        |  |  |  |  |  |  |  |                             |
|                                                                                                                                                       |                                                                                                                                                                                                                                                                                                                                                                                                                        |  |  |  |  |  |  |  |                             |
|                                                                                                                                                       |                                                                                                                                                                                                                                                                                                                                                                                                                        |  |  |  |  |  |  |  |                             |
|                                                                                                                                                       |                                                                                                                                                                                                                                                                                                                                                                                                                        |  |  |  |  |  |  |  |                             |
|                                                                                                                                                       |                                                                                                                                                                                                                                                                                                                                                                                                                        |  |  |  |  |  |  |  |                             |
|                                                                                                                                                       |                                                                                                                                                                                                                                                                                                                                                                                                                        |  |  |  |  |  |  |  |                             |
|                                                                                                                                                       |                                                                                                                                                                                                                                                                                                                                                                                                                        |  |  |  |  |  |  |  |                             |
|                                                                                                                                                       |                                                                                                                                                                                                                                                                                                                                                                                                                        |  |  |  |  |  |  |  |                             |
|                                                                                                                                                       |                                                                                                                                                                                                                                                                                                                                                                                                                        |  |  |  |  |  |  |  |                             |
|                                                                                                                                                       |                                                                                                                                                                                                                                                                                                                                                                                                                        |  |  |  |  |  |  |  |                             |
|                                                                                                                                                       |                                                                                                                                                                                                                                                                                                                                                                                                                        |  |  |  |  |  |  |  |                             |
|                                                                                                                                                       |                                                                                                                                                                                                                                                                                                                                                                                                                        |  |  |  |  |  |  |  |                             |
|                                                                                                                                                       |                                                                                                                                                                                                                                                                                                                                                                                                                        |  |  |  |  |  |  |  |                             |
|                                                                                                                                                       |                                                                                                                                                                                                                                                                                                                                                                                                                        |  |  |  |  |  |  |  |                             |
|                                                                                                                                                       |                                                                                                                                                                                                                                                                                                                                                                                                                        |  |  |  |  |  |  |  |                             |
|                                                                                                                                                       |                                                                                                                                                                                                                                                                                                                                                                                                                        |  |  |  |  |  |  |  |                             |
|                                                                                                                                                       |                                                                                                                                                                                                                                                                                                                                                                                                                        |  |  |  |  |  |  |  |                             |
|                                                                                                                                                       |                                                                                                                                                                                                                                                                                                                                                                                                                        |  |  |  |  |  |  |  |                             |
|                                                                                                                                                       |                                                                                                                                                                                                                                                                                                                                                                                                                        |  |  |  |  |  |  |  |                             |
|                                                                                                                                                       |                                                                                                                                                                                                                                                                                                                                                                                                                        |  |  |  |  |  |  |  |                             |
|                                                                                                                                                       |                                                                                                                                                                                                                                                                                                                                                                                                                        |  |  |  |  |  |  |  |                             |
|                                                                                                                                                       |                                                                                                                                                                                                                                                                                                                                                                                                                        |  |  |  |  |  |  |  |                             |
|                                                                                                                                                       |                                                                                                                                                                                                                                                                                                                                                                                                                        |  |  |  |  |  |  |  |                             |
|                                                                                                                                                       |                                                                                                                                                                                                                                                                                                                                                                                                                        |  |  |  |  |  |  |  |                             |
|                                                                                                                                                       |                                                                                                                                                                                                                                                                                                                                                                                                                        |  |  |  |  |  |  |  |                             |
|                                                                                                                                                       |                                                                                                                                                                                                                                                                                                                                                                                                                        |  |  |  |  |  |  |  |                             |
|                                                                                                                                                       |                                                                                                                                                                                                                                                                                                                                                                                                                        |  |  |  |  |  |  |  |                             |
|                                                                                                                                                       |                                                                                                                                                                                                                                                                                                                                                                                                                        |  |  |  |  |  |  |  |                             |
|                                                                                                                                                       |                                                                                                                                                                                                                                                                                                                                                                                                                        |  |  |  |  |  |  |  |                             |
|                                                                                                                                                       |                                                                                                                                                                                                                                                                                                                                                                                                                        |  |  |  |  |  |  |  |                             |
|                                                                                                                                                       |                                                                                                                                                                                                                                                                                                                                                                                                                        |  |  |  |  |  |  |  |                             |
|                                                                                                                                                       |                                                                                                                                                                                                                                                                                                                                                                                                                        |  |  |  |  |  |  |  |                             |
|                                                                                                                                                       |                                                                                                                                                                                                                                                                                                                                                                                                                        |  |  |  |  |  |  |  |                             |
|                                                                                                                                                       |                                                                                                                                                                                                                                                                                                                                                                                                                        |  |  |  |  |  |  |  |                             |
|                                                                                                                                                       |                                                                                                                                                                                                                                                                                                                                                                                                                        |  |  |  |  |  |  |  |                             |
|                                                                                                                                                       |                                                                                                                                                                                                                                                                                                                                                                                                                        |  |  |  |  |  |  |  |                             |
|                                                                                                                                                       |                                                                                                                                                                                                                                                                                                                                                                                                                        |  |  |  |  |  |  |  |                             |
|                                                                                                                                                       |                                                                                                                                                                                                                                                                                                                                                                                                                        |  |  |  |  |  |  |  |                             |
|                                                                                                                                                       |                                                                                                                                                                                                                                                                                                                                                                                                                        |  |  |  |  |  |  |  |                             |
|                                                                                                                                                       |                                                                                                                                                                                                                                                                                                                                                                                                                        |  |  |  |  |  |  |  |                             |
|                                                                                                                                                       |                                                                                                                                                                                                                                                                                                                                                                                                                        |  |  |  |  |  |  |  |                             |
|                                                                                                                                                       |                                                                                                                                                                                                                                                                                                                                                                                                                        |  |  |  |  |  |  |  |                             |
|                                                                                                                                                       |                                                                                                                                                                                                                                                                                                                                                                                                                        |  |  |  |  |  |  |  |                             |
|                                                                                                                                                       |                                                                                                                                                                                                                                                                                                                                                                                                                        |  |  |  |  |  |  |  |                             |
|                                                                                                                                                       |                                                                                                                                                                                                                                                                                                                                                                                                                        |  |  |  |  |  |  |  |                             |
|                                                                                                                                                       |                                                                                                                                                                                                                                                                                                                                                                                                                        |  |  |  |  |  |  |  |                             |
|                                                                                                                                                       |                                                                                                                                                                                                                                                                                                                                                                                                                        |  |  |  |  |  |  |  |                             |
|                                                                                                                                                       |                                                                                                                                                                                                                                                                                                                                                                                                                        |  |  |  |  |  |  |  |                             |
|                                                                                                                                                       |                                                                                                                                                                                                                                                                                                                                                                                                                        |  |  |  |  |  |  |  |                             |
|                                                                                                                                                       |                                                                                                                                                                                                                                                                                                                                                                                                                        |  |  |  |  |  |  |  |                             |
|                                                                                                                                                       |                                                                                                                                                                                                                                                                                                                                                                                                                        |  |  |  |  |  |  |  |                             |
|                                                                                                                                                       |                                                                                                                                                                                                                                                                                                                                                                                                                        |  |  |  |  |  |  |  |                             |
|                                                                                                                                                       |                                                                                                                                                                                                                                                                                                                                                                                                                        |  |  |  |  |  |  |  |                             |
|                                                                                                                                                       |                                                                                                                                                                                                                                                                                                                                                                                                                        |  |  |  |  |  |  |  |                             |
|                                                                                                                                                       |                                                                                                                                                                                                                                                                                                                                                                                                                        |  |  |  |  |  |  |  |                             |
|                                                                                                                                                       |                                                                                                                                                                                                                                                                                                                                                                                                                        |  |  |  |  |  |  |  |                             |
|                                                                                                                                                       |                                                                                                                                                                                                                                                                                                                                                                                                                        |  |  |  |  |  |  |  |                             |
|                                                                                                                                                       |                                                                                                                                                                                                                                                                                                                                                                                                                        |  |  |  |  |  |  |  |                             |
|                                                                                                                                                       |                                                                                                                                                                                                                                                                                                                                                                                                                        |  |  |  |  |  |  |  |                             |
|                                                                                                                                                       |                                                                                                                                                                                                                                                                                                                                                                                                                        |  |  |  |  |  |  |  |                             |
|                                                                                                                                                       |                                                                                                                                                                                                                                                                                                                                                                                                                        |  |  |  |  |  |  |  |                             |
|                                                                                                                                                       |                                                                                                                                                                                                                                                                                                                                                                                                                        |  |  |  |  |  |  |  |                             |
|                                                                                                                                                       |                                                                                                                                                                                                                                                                                                                                                                                                                        |  |  |  |  |  |  |  |                             |
|                                                                                                                                                       |                                                                                                                                                                                                                                                                                                                                                                                                                        |  |  |  |  |  |  |  |                             |
|                                                                                                                                                       |                                                                                                                                                                                                                                                                                                                                                                                                                        |  |  |  |  |  |  |  |                             |
|                                                                                                                                                       |                                                                                                                                                                                                                                                                                                                                                                                                                        |  |  |  |  |  |  |  |                             |
|                                                                                                                                                       |                                                                                                                                                                                                                                                                                                                                                                                                                        |  |  |  |  |  |  |  |                             |
|                                                                                                                                                       |                                                                                                                                                                                                                                                                                                                                                                                                                        |  |  |  |  |  |  |  |                             |
|                                                                                                                                                       |                                                                                                                                                                                                                                                                                                                                                                                                                        |  |  |  |  |  |  |  |                             |
|                                                                                                                                                       |                                                                                                                                                                                                                                                                                                                                                                                                                        |  |  |  |  |  |  |  |                             |
|                                                                                                                                                       |                                                                                                                                                                                                                                                                                                                                                                                                                        |  |  |  |  |  |  |  |                             |
|                                                                                                                                                       |                                                                                                                                                                                                                                                                                                                                                                                                                        |  |  |  |  |  |  |  |                             |
|                                                                                                                                                       |                                                                                                                                                                                                                                                                                                                                                                                                                        |  |  |  |  |  |  |  |                             |
|                                                                                                                                                       |                                                                                                                                                                                                                                                                                                                                                                                                                        |  |  |  |  |  |  |  |                             |
|                                                                                                                                                       |                                                                                                                                                                                                                                                                                                                                                                                                                        |  |  |  |  |  |  |  |                             |
|                                                                                                                                                       |                                                                                                                                                                                                                                                                                                                                                                                                                        |  |  |  |  |  |  |  |                             |
|                                                                                                                                                       |                                                                                                                                                                                                                                                                                                                                                                                                                        |  |  |  |  |  |  |  |                             |
|                                                                                                                                                       |                                                                                                                                                                                                                                                                                                                                                                                                                        |  |  |  |  |  |  |  |                             |
|                                                                                                                                                       |                                                                                                                                                                                                                                                                                                                                                                                                                        |  |  |  |  |  |  |  |                             |
|                                                                                                                                                       |                                                                                                                                                                                                                                                                                                                                                                                                                        |  |  |  |  |  |  |  |                             |
|                                                                                                                                                       |                                                                                                                                                                                                                                                                                                                                                                                                                        |  |  |  |  |  |  |  |                             |
|                                                                                                                                                       |                                                                                                                                                                                                                                                                                                                                                                                                                        |  |  |  |  |  |  |  |                             |
|                                                                                                                                                       |                                                                                                                                                                                                                                                                                                                                                                                                                        |  |  |  |  |  |  |  |                             |
|                                                                                                                                                       |                                                                                                                                                                                                                                                                                                                                                                                                                        |  |  |  |  |  |  |  |                             |
|                                                                                                                                                       |                                                                                                                                                                                                                                                                                                                                                                                                                        |  |  |  |  |  |  |  |                             |
|                                                                                                                                                       |                                                                                                                                                                                                                                                                                                                                                                                                                        |  |  |  |  |  |  |  |                             |
|                                                                                                                                                       |                                                                                                                                                                                                                                                                                                                                                                                                                        |  |  |  |  |  |  |  |                             |
|                                                                                                                                                       |                                                                                                                                                                                                                                                                                                                                                                                                                        |  |  |  |  |  |  |  |                             |
|                                                                                                                                                       |                                                                                                                                                                                                                                                                                                                                                                                                                        |  |  |  |  |  |  |  |                             |
|                                                                                                                                                       |                                                                                                                                                                                                                                                                                                                                                                                                                        |  |  |  |  |  |  |  |                             |
|                                                                                                                                                       |                                                                                                                                                                                                                                                                                                                                                                                                                        |  |  |  |  |  |  |  |                             |
|                                                                                                                                                       |                                                                                                                                                                                                                                                                                                                                                                                                                        |  |  |  |  |  |  |  |                             |
|                                                                                                                                                       |                                                                                                                                                                                                                                                                                                                                                                                                                        |  |  |  |  |  |  |  |                             |
|                                                                                                                                                       |                                                                                                                                                                                                                                                                                                                                                                                                                        |  |  |  |  |  |  |  |                             |
|                                                                                                                                                       |                                                                                                                                                                                                                                                                                                                                                                                                                        |  |  |  |  |  |  |  |                             |
|                                                                                                                                                       |                                                                                                                                                                                                                                                                                                                                                                                                                        |  |  |  |  |  |  |  |                             |
|                                                                                                                                                       |                                                                                                                                                                                                                                                                                                                                                                                                                        |  |  |  |  |  |  |  |                             |
|                                                                                                                                                       |                                                                                                                                                                                                                                                                                                                                                                                                                        |  |  |  |  |  |  |  |                             |
|                                                                                                                                                       |                                                                                                                                                                                                                                                                                                                                                                                                                        |  |  |  |  |  |  |  |                             |
|                                                                                                                                                       |                                                                                                                                                                                                                                                                                                                                                                                                                        |  |  |  |  |  |  |  |                             |
|                                                                                                                                                       |                                                                                                                                                                                                                                                                                                                                                                                                                        |  |  |  |  |  |  |  |                             |
|                                                                                                                                                       |                                                                                                                                                                                                                                                                                                                                                                                                                        |  |  |  |  |  |  |  |                             |
|                                                                                                                                                       |                                                                                                                                                                                                                                                                                                                                                                                                                        |  |  |  |  |  |  |  |                             |
|                                                                                                                                                       |                                                                                                                                                                                                                                                                                                                                                                                                                        |  |  |  |  |  |  |  |                             |
|                                                                                                                                                       |                                                                                                                                                                                                                                                                                                                                                                                                                        |  |  |  |  |  |  |  |                             |
|                                                                                                                                                       |                                                                                                                                                                                                                                                                                                                                                                                                                        |  |  |  |  |  |  |  |                             |
|                                                                                                                                                       |                                                                                                                                                                                                                                                                                                                                                                                                                        |  |  |  |  |  |  |  |                             |
|                                                                                                                                                       |                                                                                                                                                                                                                                                                                                                                                                                                                        |  |  |  |  |  |  |  |                             |
|                                                                                                                                                       |                                                                                                                                                                                                                                                                                                                                                                                                                        |  |  |  |  |  |  |  |                             |
|                                                                                                                                                       |                                                                                                                                                                                                                                                                                                                                                                                                                        |  |  |  |  |  |  |  |                             |
|                                                                                                                                                       |                                                                                                                                                                                                                                                                                                                                                                                                                        |  |  |  |  |  |  |  |                             |
|                                                                                                                                                       |                                                                                                                                                                                                                                                                                                                                                                                                                        |  |  |  |  |  |  |  |                             |
|                                                                                                                                                       |                                                                                                                                                                                                                                                                                                                                                                                                                        |  |  |  |  |  |  |  |                             |
|                                                                                                                                                       |                                                                                                                                                                                                                                                                                                                                                                                                                        |  |  |  |  |  |  |  |                             |
|                                                                                                                                                       |                                                                                                                                                                                                                                                                                                                                                                                                                        |  |  |  |  |  |  |  |                             |
|                                                                                                                                                       |                                                                                                                                                                                                                                                                                                                                                                                                                        |  |  |  |  |  |  |  |                             |
|                                                                                                                                                       |                                                                                                                                                                                                                                                                                                                                                                                                                        |  |  |  |  |  |  |  |                             |
|                                                                                                                                                       |                                                                                                                                                                                                                                                                                                                                                                                                                        |  |  |  |  |  |  |  |                             |
|                                                                                                                                                       |                                                                                                                                                                                                                                                                                                                                                                                                                        |  |  |  |  |  |  |  |                             |
|                                                                                                                                                       |                                                                                                                                                                                                                                                                                                                                                                                                                        |  |  |  |  |  |  |  |                             |
|                                                                                                                                                       |                                                                                                                                                                                                                                                                                                                                                                                                                        |  |  |  |  |  |  |  |                             |
|                                                                                                                                                       |                                                                                                                                                                                                                                                                                                                                                                                                                        |  |  |  |  |  |  |  |                             |
|                                                                                                                                                       |                                                                                                                                                                                                                                                                                                                                                                                                                        |  |  |  |  |  |  |  |                             |
|                                                                                                                                                       |                                                                                                                                                                                                                                                                                                                                                                                                                        |  |  |  |  |  |  |  |                             |
|                                                                                                                                                       |                                                                                                                                                                                                                                                                                                                                                                                                                        |  |  |  |  |  |  |  |                             |
|                                                                                                                                                       |                                                                                                                                                                                                                                                                                                                                                                                                                        |  |  |  |  |  |  |  |                             |
|                                                                                                                                                       |                                                                                                                                                                                                                                                                                                                                                                                                                        |  |  |  |  |  |  |  |                             |
|                                                                                                                                                       |                                                                                                                                                                                                                                                                                                                                                                                                                        |  |  |  |  |  |  |  |                             |
|                                                                                                                                                       |                                                                                                                                                                                                                                                                                                                                                                                                                        |  |  |  |  |  |  |  |                             |
|                                                                                                                                                       |                                                                                                                                                                                                                                                                                                                                                                                                                        |  |  |  |  |  |  |  |                             |
|                                                                                                                                                       |                                                                                                                                                                                                                                                                                                                                                                                                                        |  |  |  |  |  |  |  |                             |
|                                                                                                                                                       |                                                                                                                                                                                                                                                                                                                                                                                                                        |  |  |  |  |  |  |  |                             |
|                                                                                                                                                       |                                                                                                                                                                                                                                                                                                                                                                                                                        |  |  |  |  |  |  |  |                             |
|                                                                                                                                                       |                                                                                                                                                                                                                                                                                                                                                                                                                        |  |  |  |  |  |  |  |                             |
|                                                                                                                                                       |                                                                                                                                                                                                                                                                                                                                                                                                                        |  |  |  |  |  |  |  |                             |
|                                                                                                                                                       |                                                                                                                                                                                                                                                                                                                                                                                                                        |  |  |  |  |  |  |  |                             |
|                                                                                                                                                       |                                                                                                                                                                                                                                                                                                                                                                                                                        |  |  |  |  |  |  |  |                             |
|                                                                                                                                                       |                                                                                                                                                                                                                                                                                                                                                                                                                        |  |  |  |  |  |  |  |                             |
|                                                                                                                                                       |                                                                                                                                                                                                                                                                                                                                                                                                                        |  |  |  |  |  |  |  |                             |
|                                                                                                                                                       |                                                                                                                                                                                                                                                                                                                                                                                                                        |  |  |  |  |  |  |  |                             |
|                                                                                                                                                       |                                                                                                                                                                                                                                                                                                                                                                                                                        |  |  |  |  |  |  |  |                             |
|                                                                                                                                                       |                                                                                                                                                                                                                                                                                                                                                                                                                        |  |  |  |  |  |  |  |                             |
|                                                                                                                                                       |                                                                                                                                                                                                                                                                                                                                                                                                                        |  |  |  |  |  |  |  |                             |
|                                                                                                                                                       |                                                                                                                                                                                                                                                                                                                                                                                                                        |  |  |  |  |  |  |  |                             |
|                                                                                                                                                       |                                                                                                                                                                                                                                                                                                                                                                                                                        |  |  |  |  |  |  |  |                             |
|                                                                                                                                                       |                                                                                                                                                                                                                                                                                                                                                                                                                        |  |  |  |  |  |  |  |                             |
|                                                                                                                                                       |                                                                                                                                                                                                                                                                                                                                                                                                                        |  |  |  |  |  |  |  |                             |
|                                                                                                                                                       |                                                                                                                                                                                                                                                                                                                                                                                                                        |  |  |  |  |  |  |  |                             |
|                                                                                                                                                       |                                                                                                                                                                                                                                                                                                                                                                                                                        |  |  |  |  |  |  |  |                             |
|                                                                                                                                                       |                                                                                                                                                                                                                                                                                                                                                                                                                        |  |  |  |  |  |  |  |                             |
|                                                                                                                                                       |                                                                                                                                                                                                                                                                                                                                                                                                                        |  |  |  |  |  |  |  |                             |
|                                                                                                                                                       |                                                                                                                                                                                                                                                                                                                                                                                                                        |  |  |  |  |  |  |  |                             |
|                                                                                                                                                       |                                                                                                                                                                                                                                                                                                                                                                                                                        |  |  |  |  |  |  |  |                             |
|                                                                                                                                                       |                                                                                                                                                                                                                                                                                                                                                                                                                        |  |  |  |  |  |  |  |                             |
|                                                                                                                                                       |                                                                                                                                                                                                                                                                                                                                                                                                                        |  |  |  |  |  |  |  |                             |
|                                                                                                                                                       |                                                                                                                                                                                                                                                                                                                                                                                                                        |  |  |  |  |  |  |  |                             |
|                                                                                                                                                       |                                                                                                                                                                                                                                                                                                                                                                                                                        |  |  |  |  |  |  |  |                             |
|                                                                                                                                                       |                                                                                                                                                                                                                                                                                                                                                                                                                        |  |  |  |  |  |  |  |                             |
|                                                                                                                                                       |                                                                                                                                                                                                                                                                                                                                                                                                                        |  |  |  |  |  |  |  |                             |
|                                                                                                                                                       |                                                                                                                                                                                                                                                                                                                                                                                                                        |  |  |  |  |  |  |  |                             |
|                                                                                                                                                       |                                                                                                                                                                                                                                                                                                                                                                                                                        |  |  |  |  |  |  |  |                             |
|                                                                                                                                                       |                                                                                                                                                                                                                                                                                                                                                                                                                        |  |  |  |  |  |  |  |                             |
|                                                                                                                                                       |                                                                                                                                                                                                                                                                                                                                                                                                                        |  |  |  |  |  |  |  |                             |
|                                                                                                                                                       |                                                                                                                                                                                                                                                                                                                                                                                                                        |  |  |  |  |  |  |  |                             |
|                                                                                                                                                       |                                                                                                                                                                                                                                                                                                                                                                                                                        |  |  |  |  |  |  |  |                             |
|                                                                                                                                                       |                                                                                                                                                                                                                                                                                                                                                                                                                        |  |  |  |  |  |  |  |                             |
|                                                                                                                                                       |                                                                                                                                                                                                                                                                                                                                                                                                                        |  |  |  |  |  |  |  |                             |
|                                                                                                                                                       |                                                                                                                                                                                                                                                                                                                                                                                                                        |  |  |  |  |  |  |  |                             |
|                                                                                                                                                       |                                                                                                                                                                                                                                                                                                                                                                                                                        |  |  |  |  |  |  |  |                             |
|                                                                                                                                                       |                                                                                                                                                                                                                                                                                                                                                                                                                        |  |  |  |  |  |  |  |                             |

## GPC para pacientes con Espondiloartritis Axial ASOREUMA

|                                                                        |                               |                                              |             |       |             |       |         |                 |                             |
|------------------------------------------------------------------------|-------------------------------|----------------------------------------------|-------------|-------|-------------|-------|---------|-----------------|-----------------------------|
| <b>Verdaderos negativos</b><br>(pacientes que no tienen EPA)           | 1 estudios<br>75<br>pacientes | Estudios de tipo cohorte y casos y controles | no es serio | serio | no es serio | serio | ninguno | 921 (832 a 960) | ⊕⊕○○<br>Baja <sup>1,2</sup> |
|                                                                        |                               |                                              |             |       |             |       |         | 69 (30 a 158)   |                             |
| <b>Falsos positivos</b><br>(pacientes mal clasificados que tienen EPA) |                               |                                              |             |       |             |       |         |                 |                             |

1. No se identificaron estudios que compararan cabeza a cabeza la intervención y comparador de interés

2. Medidas de efecto imprecisas, especialmente para los falsos positivos

## Efectos Indeseables

¿Qué tan sustanciales son los efectos indeseables que se pueden anticipar?

| JUICIO                                                                                                                                                                                                               | EVIDENCIA DE LA INVESTIGACION                                                                                                                                                                                                                                                                                                                                                                                                                                                                                                                                                                                | CONSIDERACIONES ADICIONALES |
|----------------------------------------------------------------------------------------------------------------------------------------------------------------------------------------------------------------------|--------------------------------------------------------------------------------------------------------------------------------------------------------------------------------------------------------------------------------------------------------------------------------------------------------------------------------------------------------------------------------------------------------------------------------------------------------------------------------------------------------------------------------------------------------------------------------------------------------------|-----------------------------|
| <input checked="" type="radio"/> Triviales<br><input type="radio"/> Pequeños<br><input type="radio"/> Moderados<br><input type="radio"/> Grandes<br><input type="radio"/> Varían<br><input type="radio"/> No se sabe | <p>La radiografía de pelvis para la detección de sacroileítis expone al paciente a la radiación ionizante con una dosis de aproximadamente 1,5 mSv ya que, de no ser así, no se puede realizar diagnóstico de forma temprana.</p> <p>La resonancia nuclear magnética emplea un potente campo magnético por lo que pacientes con implantes como marcapasos, desfibriladores, bombas de insulina, implante coclear no podrán realizarse este estudio, el paciente se expondrá a un ruido de hasta 120 decibeles y en caso de sufrir claustrofobia se recomienda el estudio se debe realizar bajo sedación.</p> |                             |

## Certeza en la Evidencia

¿Cuál es la certeza en la evidencia global sobre los efectos de la opción a recomendar?

## GPC para pacientes con Espondiloartritis Axial ASOREUMA

| JUICIO                                                                                                                                                                                                                                                                                           | EVIDENCIA DE LA INVESTIGACION                                                                                                                                                                             | CONSIDERACIONES ADICIONALES                                                                                                                                                                                                                                                        |                      |                                 |                       |          |           |                                                                                                                                                                                                                                                               |
|--------------------------------------------------------------------------------------------------------------------------------------------------------------------------------------------------------------------------------------------------------------------------------------------------|-----------------------------------------------------------------------------------------------------------------------------------------------------------------------------------------------------------|------------------------------------------------------------------------------------------------------------------------------------------------------------------------------------------------------------------------------------------------------------------------------------|----------------------|---------------------------------|-----------------------|----------|-----------|---------------------------------------------------------------------------------------------------------------------------------------------------------------------------------------------------------------------------------------------------------------|
| <ul style="list-style-type: none"> <li>○ Muy baja</li> <li>○ Baja</li> <li>○ Moderada</li> <li>○ Alta</li> <li>○ No se identificaron estudios</li> </ul>                                                                                                                                         | <table border="1"> <tr> <td>Desenlace</td><td>Importancia relativa</td><td>Certeza en la Evidencia (GRADE)</td></tr> <tr> <td>Diagnóstico de EspAax</td><td>CRITICAL</td><td>⊕⊕○○ BAJA</td></tr> </table> | Desenlace                                                                                                                                                                                                                                                                          | Importancia relativa | Certeza en la Evidencia (GRADE) | Diagnóstico de EspAax | CRITICAL | ⊕⊕○○ BAJA | <p>A pesar de que la certeza de la evidencia es baja, lo descrito en las cohortes en relación con la historia natural de la enfermedad y el tiempo de aparición de las alteraciones en radiografía convencional hace que se considere el juicio moderado.</p> |
| Desenlace                                                                                                                                                                                                                                                                                        | Importancia relativa                                                                                                                                                                                      | Certeza en la Evidencia (GRADE)                                                                                                                                                                                                                                                    |                      |                                 |                       |          |           |                                                                                                                                                                                                                                                               |
| Diagnóstico de EspAax                                                                                                                                                                                                                                                                            | CRITICAL                                                                                                                                                                                                  | ⊕⊕○○ BAJA                                                                                                                                                                                                                                                                          |                      |                                 |                       |          |           |                                                                                                                                                                                                                                                               |
| Valores de los pacientes<br>¿Hay variación o poca certeza sobre cómo valoran las personas/los pacientes los desenlaces principales?                                                                                                                                                              |                                                                                                                                                                                                           |                                                                                                                                                                                                                                                                                    |                      |                                 |                       |          |           |                                                                                                                                                                                                                                                               |
| JUICIO                                                                                                                                                                                                                                                                                           | EVIDENCIA DE LA INVESTIGACION                                                                                                                                                                             | CONSIDERACIONES ADICIONALES                                                                                                                                                                                                                                                        |                      |                                 |                       |          |           |                                                                                                                                                                                                                                                               |
| <ul style="list-style-type: none"> <li>○ Variabilidad o incertidumbre importante</li> <li>○ Posiblemente hay variabilidad o incertidumbre importante</li> <li>○ Posiblemente No hay variabilidad o incertidumbre importante</li> <li>○ No hay variabilidad o incertidumbre importante</li> </ul> | <p>No se encontraron estudios de valores y preferencias de pacientes en espondiloartritis con relación a los procesos diagnósticos.</p>                                                                   | <p>Se estima que el diagnóstico temprano será la preferencia de pacientes con la enfermedad ya que este se asocia a un tratamiento más oportuno y por consiguiente una menor progresión de la enfermedad a estados no solo dolorosos sino también limitantes e incapacitantes.</p> |                      |                                 |                       |          |           |                                                                                                                                                                                                                                                               |
| Balance de los efectos<br>¿El balance entre los efectos deseables e indeseables favorece la opción o el comparador?                                                                                                                                                                              |                                                                                                                                                                                                           |                                                                                                                                                                                                                                                                                    |                      |                                 |                       |          |           |                                                                                                                                                                                                                                                               |

## GPC para pacientes con Espondiloartritis Axial ASOREUMA

| JUICIO                                                                                                                                                                                                                                                                                                                         | EVIDENCIA DE LA INVESTIGACION                                                                                                                                                                                                                                                                                                                                                                                                                                                                                                                                                                                                                                                                                                                                                                                                                                                                                                                                                                                                                                                                                                                                      | CONSIDERACIONES ADICIONALES |
|--------------------------------------------------------------------------------------------------------------------------------------------------------------------------------------------------------------------------------------------------------------------------------------------------------------------------------|--------------------------------------------------------------------------------------------------------------------------------------------------------------------------------------------------------------------------------------------------------------------------------------------------------------------------------------------------------------------------------------------------------------------------------------------------------------------------------------------------------------------------------------------------------------------------------------------------------------------------------------------------------------------------------------------------------------------------------------------------------------------------------------------------------------------------------------------------------------------------------------------------------------------------------------------------------------------------------------------------------------------------------------------------------------------------------------------------------------------------------------------------------------------|-----------------------------|
| <ul style="list-style-type: none"> <li>o Favorece al comparador</li> <li>o Probablemente favorece al comparador</li> <li>o No favorece al comparador ni a la opción en evaluación</li> <li>o Probablemente favorece a la opción</li> <li>o A favor de la intervención/opción</li> <li>o Varía</li> <li>o No se sabe</li> </ul> | <p>La radiografía de pelvis para la detección de sacroileítis es la técnica de imagen más usada por su amplia disponibilidad y menor costo, la resonancia nuclear magnética es menos asequible y más costosa. El balance entre los efectos deseables del diagnóstico temprano, el inicio de manejo farmacológico temprano y limitar la progresión de la enfermedad favorece los riesgos de la resonancia que son mínimos (sensación de claustrofobia, no poderse realizar en algunas poblaciones por uso de implantarles).</p>                                                                                                                                                                                                                                                                                                                                                                                                                                                                                                                                                                                                                                     |                             |
| <b>Recursos Requeridos</b><br>¿Que tan grandes son los costos asociados a la opción a recomendar?                                                                                                                                                                                                                              |                                                                                                                                                                                                                                                                                                                                                                                                                                                                                                                                                                                                                                                                                                                                                                                                                                                                                                                                                                                                                                                                                                                                                                    |                             |
| JUICIO                                                                                                                                                                                                                                                                                                                         | EVIDENCIA DE LA INVESTIGACION                                                                                                                                                                                                                                                                                                                                                                                                                                                                                                                                                                                                                                                                                                                                                                                                                                                                                                                                                                                                                                                                                                                                      | CONSIDERACIONES ADICIONALES |
| <ul style="list-style-type: none"> <li>o Grandes costos</li> <li>o Costos moderados</li> <li>o no significantes costos ni ahorros</li> <li>o Moderados ahorros</li> <li>o Grandes ahorros</li> <li>o Varían</li> <li>o No se sabe</li> </ul>                                                                                   | <p>Un estudio de costo-efectividad publicado como poster en congreso científico (9) comparo la radiografía de sacro-iliacas con la RNM para detectar sacroileítis en el diagnóstico inicial de la EspAax. Se realizó un modelo de decisión analítica desde la perspectiva del sistema de salud en pacientes con dolor lumbar inflamatorio sugestivo de EspAax, evaluando 3 estrategias con un horizonte a 3 años. El desenlace de efectividad primaria fue los años de vida ajustado por calidad (AVACs) y el límite de disposición a pagar se estableció en \$ 100,000 / AVAC (en dólares estadounidenses de 2018). La radiografía fue la estrategia dominante,</p> <p>La radiografía fue la estrategia dominante, ya que fue la opción menos costosa (\$64,782) y más efectiva (2,43 AVAC) durante un curso de 3 años. No se encontró que las estrategias basadas en MRI y radiografías/ MRI fueran opciones de imagen rentables para esta población de pacientes. El análisis de sensibilidad unidireccional demostró que la radiografía fue favorecida sobre las otras dos estrategias de imagen en una amplia gama de costos y probabilidades razonables.</p> |                             |
| <b>Equidad</b>                                                                                                                                                                                                                                                                                                                 |                                                                                                                                                                                                                                                                                                                                                                                                                                                                                                                                                                                                                                                                                                                                                                                                                                                                                                                                                                                                                                                                                                                                                                    |                             |

## GPC para pacientes con Espondiloartritis Axial ASOREUMA

| ¿La implementación de la opción, tendrá impacto en la equidad?                                                                                                                                                                                           |                                                                                                                                                                                                                                                                                                                                                                                                                                                                                                            |                                                                                                                                                                                                                                                                                                                                                                                                                                                                                                                                                                                        |
|----------------------------------------------------------------------------------------------------------------------------------------------------------------------------------------------------------------------------------------------------------|------------------------------------------------------------------------------------------------------------------------------------------------------------------------------------------------------------------------------------------------------------------------------------------------------------------------------------------------------------------------------------------------------------------------------------------------------------------------------------------------------------|----------------------------------------------------------------------------------------------------------------------------------------------------------------------------------------------------------------------------------------------------------------------------------------------------------------------------------------------------------------------------------------------------------------------------------------------------------------------------------------------------------------------------------------------------------------------------------------|
| JUICIO                                                                                                                                                                                                                                                   | EVIDENCIA DE LA INVESTIGACION                                                                                                                                                                                                                                                                                                                                                                                                                                                                              | CONSIDERACIONES ADICIONALES                                                                                                                                                                                                                                                                                                                                                                                                                                                                                                                                                            |
| <ul style="list-style-type: none"> <li>○ Reduce</li> <li>○ Probablemente se reduce la equidad</li> <li>○ Probablemente no impacta la equidad</li> <li>○ Probablemente incrementa</li> <li>○ Incrementa</li> <li>○ Varía</li> <li>○ No se sabe</li> </ul> | No hay estudios que valoren el impacto en la equidad en las estrategias de diagnóstico de la EspAax.                                                                                                                                                                                                                                                                                                                                                                                                       | <p>Dadas las condiciones de los servicios de salud del país, es muy probable que recomendar la RNM incremente las inequidades en salud en la población del país. Ya que no se estará cumpliendo el principio de “igualdad de acceso para la misma necesidad” (16). Se requiere por parte del sistema de salud de acciones que brinden condiciones necesarias para que aquellos con las mismas necesidades (pacientes con dolor crónico, o sospecha de EspAax axial) tengan igual</p> <p>oportunidades para acceder a la atención médica (es decir, equidad horizontal) y a la RNM.</p> |
| Aceptabilidad                                                                                                                                                                                                                                            |                                                                                                                                                                                                                                                                                                                                                                                                                                                                                                            |                                                                                                                                                                                                                                                                                                                                                                                                                                                                                                                                                                                        |
| ¿Es la opción aceptada por los diferentes actores involucrados en su implementación?                                                                                                                                                                     |                                                                                                                                                                                                                                                                                                                                                                                                                                                                                                            |                                                                                                                                                                                                                                                                                                                                                                                                                                                                                                                                                                                        |
| JUICIO                                                                                                                                                                                                                                                   | EVIDENCIA DE LA INVESTIGACION                                                                                                                                                                                                                                                                                                                                                                                                                                                                              | CONSIDERACIONES ADICIONALES                                                                                                                                                                                                                                                                                                                                                                                                                                                                                                                                                            |
| <ul style="list-style-type: none"> <li>○ No</li> <li>○ Probablemente no</li> <li>○ Probablemente si</li> <li>○ Si</li> <li>○ Varía</li> <li>○ No se sabe</li> </ul>                                                                                      | La radiografía de la articulación sacro ilíaca es la primera técnica de imagen para el diagnóstico de la sacroileítis asociada a la espondiloartritis axial según las recomendaciones de la European League Against Rheumatism (EULAR) (10), con respecto a la RNM las recomendaciones EULAR indican su realización en pacientes jóvenes o con síntomas de corta duración y como una alternativa a la radiografía como primer método de imagen para el diagnóstico temprano de la espondiloartritis axial. |                                                                                                                                                                                                                                                                                                                                                                                                                                                                                                                                                                                        |

## GPC para pacientes con Espondiloartritis Axial ASOREUMA

|                                                                                                                                                                                                  |                                                                                                                                                                                                           |                                                                                                                            |
|--------------------------------------------------------------------------------------------------------------------------------------------------------------------------------------------------|-----------------------------------------------------------------------------------------------------------------------------------------------------------------------------------------------------------|----------------------------------------------------------------------------------------------------------------------------|
|                                                                                                                                                                                                  | Las guías NICE (11) recomiendan realizar radiografía de las articulaciones sacroilíacas en pacientes en los que se sospeche espondiloartritis axial a no ser que el paciente tenga un esqueleto inmaduro. |                                                                                                                            |
| <b>Factibilidad</b><br>¿Es la opción factible de IMPLEMENTAR?                                                                                                                                    |                                                                                                                                                                                                           |                                                                                                                            |
| <b>JUICIO</b>                                                                                                                                                                                    | <b>EVIDENCIA DE LA INVESTIGACION</b>                                                                                                                                                                      | <b>CONSIDERACIONES ADICIONALES</b>                                                                                         |
| No<br><input type="radio"/> Probablemente no<br><input checked="" type="radio"/> Probablemente si<br><input type="radio"/> Si<br><input type="radio"/> Varia<br><input type="radio"/> No se sabe |                                                                                                                                                                                                           | La disponibilidad de resonadores en las diferentes regiones del país podría limitar la implementación de la recomendación. |

## Resumen de Juicios

|                         | JUICIOS                                 |                         |                            |                                            |  |       |                 |
|-------------------------|-----------------------------------------|-------------------------|----------------------------|--------------------------------------------|--|-------|-----------------|
| PROBLEMA                | No                                      | Probablemente no        | Probablemente si           | Si                                         |  | Varía | No se sabe      |
| EFFECTOS DESEABLES      | Trivial                                 | Pequeño                 | Moderado                   | Largo                                      |  | Varía | No se sabe      |
| EFFECTOS INDESEABLES    | Largo                                   | Moderado                | Pequeño                    | Trivial                                    |  | Varía | No se sabe      |
| CERTEZA EN LA EVIDENCIA | Muy bajo                                | Bajo                    | Moderado                   | Alto                                       |  |       | No hay estudios |
| VALORES DE PACIENTES    | Importante incertidumbre o variabilidad | Posiblemente importante | Posiblemente no importante | No importante incertidumbre o variabilidad |  |       |                 |

|                        | JUICIOS                      |                                               |                                                                          |                                                            |                                           |       |            |
|------------------------|------------------------------|-----------------------------------------------|--------------------------------------------------------------------------|------------------------------------------------------------|-------------------------------------------|-------|------------|
|                        |                              | incertidumbre o<br>variabilidad               | incertidumbre o<br>variabilidad                                          |                                                            |                                           |       |            |
| BALANCE DE LOS EFECTOS | A favor de la<br>comparación | Probablemente a<br>favor de la<br>comparación | Probablemente no<br>favorece ni a la<br>intervención ni al<br>comparador | Probablemente a<br>favor de la<br>intervención<br>(opción) | A favor de la<br>intervención<br>(opción) | Varía | No se sabe |
| RECURSOS REQUERIDOS    | Altos costos                 | Costos moderados                              | Costos y ahorros<br>intangibles                                          | Moderados ahorros                                          | Gran ahorro                               | Varía | No se sabe |
| EQUIDAD                | Reducida                     | Probablemente<br>reduce                       | Probablemente no<br>impacto                                              | Probablemente<br>incrementa                                | Incrementa                                | Varía | No se sabe |
| ACEPTABILIDAD          | No                           | Probablemente no                              | Probablemente SI                                                         | SI                                                         |                                           | Varía | No se sabe |
| FACTIBILIDAD           | No                           | Probablemente no                              | Probablemente SI                                                         | SI                                                         |                                           | Varía | No se sabe |

Tipo de Recomendación

|                                                |                                                     |                                                                                 |                                                   |                                              |
|------------------------------------------------|-----------------------------------------------------|---------------------------------------------------------------------------------|---------------------------------------------------|----------------------------------------------|
| Recomendación fuerte en contra<br>de la opción | Recomendación condicional en<br>contra de la opción | Recomendación condicional a favor<br>de cualquiera la opción o su<br>comparador | Recomendación condicional a favor<br>de la opción | Recomendación fuerte a favor de la<br>opción |
| ○                                              | ○                                                   | ○                                                                               | ○                                                 | ○                                            |

## Conclusiones

Teniendo en cuenta el comportamiento de la enfermedad y los momentos de aparición de las alteraciones radiológicas, se considera pertinente basado en la capacidad de la RNM de detectar cambios tempranos de la enfermedad, realizar este estudio en población joven, con enfermedad pocos años de duración a fin de definir acciones terapéuticas tempranas.

### Recomendación

Se sugiere realizar radiografía convencional de las articulaciones sacroilíacas como el primer método de imagen para diagnósticas la sacroileítis como parte de la EspAax.

Si el diagnóstico de EspAax no puede establecerse en función de las características clínicas y la radiografía convencional y todavía se sospecha EspAax, se sugiere utilizar la RNM de las articulaciones sacroilíaca. Recomendación condicional a favor de la radiografía convencional. Evidencia de baja calidad

### Puntos de buena Práctica

El panel considera que no es pertinente solicitar gammagrafía ósea para el estudio de pacientes con dolor lumbar y sospecha de espondiloartritis axial.

### Justificación

Los bajos costos de la radiografía convencional vs la RNM junto a la efectividad para el diagnóstico de EspAax la hace la primera opción salvo consideraciones especiales en subgrupos.

### Consideraciones por subgrupos



En pacientes jóvenes o con síntomas de corta duración se sugiere realizar RNM de articulaciones sacroilíacas como una alternativa a la radiografía como primera opción para el diagnóstico temprano de la espondiloartritis axial. Evidencia de baja calidad.

## Consideraciones de implementación

En Colombia la disponibilidad de resonadores en las diferentes regiones del país es muy limitada con lo cual la implementación de la recomendación puede estar limitada a las principales ciudades, lo que aumentará las brechas de inequidad en salud. Particularmente afectará a poblaciones pequeñas o distantes del país, con acceso limitado a servicios de salud idóneos para sus necesidades de atención.

## Monitoreo y evaluación de cumplimiento

Determinar de forma periódica, con las bases de datos disponibles, la proporción de pacientes con sospecha de EspAax a los cuales se les solicitó radiografía lumbosacra, y la proporción de pacientes a quienes se les solicitó RNM.

## Prioridades de investigación futura

Diseñar y ejecutar estudios intervencionales que evalúen comparativamente la RNM vs la radiografía lumbosacra en el diagnóstico temprano de la EspAax.

## Tablas GRADE

Pregunta: ¿Debería usarse Resonancia nuclear Magnética de sacroilíacas en vez de Rx de sacroilíacas para diagnosticar Espondiloartritis axial en dolor inflamatorio crónico?

|               |                            |
|---------------|----------------------------|
| Sensibilidad  | 0.67 (95% CI: 0.48 a 0.81) |
| Especificidad | 0.93 (95% CI: 0.84 a 0.97) |

|              |    |
|--------------|----|
| Prevalencias | 1% |
|--------------|----|

| Resultado                                                                 | No de estudios (No de pacientes) | Diseño de estudio                            | Factores que pueden incrementar la certeza en la evidencia |                     |                |             |                      | Efecto por 1000 pacientes evaluados | Precisión de la prueba      |
|---------------------------------------------------------------------------|----------------------------------|----------------------------------------------|------------------------------------------------------------|---------------------|----------------|-------------|----------------------|-------------------------------------|-----------------------------|
|                                                                           |                                  |                                              | Riesgo de sesgo                                            | Evidencia indirecta | Inconsistencia | Imprecisión | Sesgo de publicación | probabilidad pretest de 1%          |                             |
| <b>Verdaderos positivos</b><br>(pacientes con EPA)                        | 1 estudios<br>75 pacientes       | Estudios de tipo cohorte y casos y controles | no es serio                                                | serio               | no es serio    | serio       | ninguno              | 7 (5 a 8)                           | ⊕⊕○○<br>Baja <sup>1,2</sup> |
| <b>Falsos negativos</b><br>(pacientes mal clasificados como no tener EPA) |                                  |                                              |                                                            |                     |                |             |                      | 3 (2 a 5)                           |                             |
| <b>Verdaderos negativos</b><br>(pacientes que no tienen EPA)              | 1 estudios<br>75 pacientes       | Estudios de tipo cohorte y casos y controles | no es serio                                                | serio               | no es serio    | serio       | ninguno              | 921 (832 a 960)                     | ⊕⊕○○<br>Baja <sup>1,2</sup> |
| <b>Falsos positivos</b><br>(pacientes mal clasificados que tienen EPA)    |                                  |                                              |                                                            |                     |                |             |                      | 69 (30 a 158)                       |                             |

1. No se identificaron estudios que compararan cabeza a cabeza la intervención y comparador de interés

2. Medidas de efecto imprecisas, especialmente para los falsos positivos

## Referencias

1. Juanola Roura X, Collantes Estévez E, León Vázquez F, Torres Villamor A, García Yébenes MJ, Queiro Silva R, et al. Recomendaciones para la detección, investigación y derivación del dolor lumbar inflamatorio en Atención Primaria. *Reumatol Clínica* [Internet]. 1 de marzo de 2015 [citado 4 de febrero de 2020];11(2):90-8. Disponible en: <http://www.reumatologiainclinica.org/es-recomendaciones-deteccion-investigacion-derivacion-del-articulo-S1699258X14001041>
2. Arnbak B, Leboeuf-Yde C, Jensen TS. A systematic critical review on MRI in spondyloarthritis. *Arthritis Res Ther*. 9 de marzo de 2012;14(2):R55.
3. Weber U, Zubler V, Zhao Z, Lambert RGW, Chan SM, Pedersen SJ, et al. Does spinal MRI add incremental diagnostic value to MRI of the sacroiliac joints alone in patients with non-radiographic axial spondyloarthritis? *Ann Rheum Dis*. junio de 2015;74(6):985-92.
4. Poddubnyy D, Gaydukova I, Hermann K-G, Song I-H, Haibel H, Braun J, et al. Magnetic resonance imaging compared to conventional radiographs for detection of chronic structural changes in sacroiliac joints in axial spondyloarthritis. *J Rheumatol*. septiembre de 2013;40(9):1557-65.
5. Dougados M, Sepriano A, Molto A, van Lunteren M, Ramiro S, de Hooge M, et al. Sacroiliac radiographic progression in recent onset axial spondyloarthritis: the 5-year data of the DESIR cohort. *Ann Rheum Dis*. noviembre de 2017;76(11):1823-8.
6. Weber U, Lambert RG, Ostergaard M, Hodler J, Pedersen SJ, Maksymowych WP. The diagnostic utility of MRI in spondyloarthritis: An international multicentre evaluation of 187 subjects (The MORPHO study). *Arthritis Rheum* [Internet]. octubre de 2010 [citado 12 de febrero de 2020];62(10):3048-58. Disponible en: <https://www.zora.uzh.ch/id/eprint/34330/>
7. Weber U, Hodler J, Kubik RA, Rufibach K, Lambert RGW, Kissling RO, et al. Sensitivity and specificity of spinal inflammatory lesions assessed by whole-body magnetic resonance imaging in patients with ankylosing spondylitis or recent-onset inflammatory back pain. *Arthritis Rheum*. 15 de julio de 2009;61(7):900-8.
8. Evaluation of diagnostic criteria for ankylosing spondylitis. A proposal for modification of the New York criteria. - PubMed - NCBI [Internet]. [citado 12 de febrero de 2020]. Disponible en: <https://www.ncbi.nlm.nih.gov/pubmed/6231933>
9. Rodrigues T, Gorelik N, Tamizuddin F, Gyftopoulos S, Beltran L, Malik F, et al. COMPARISON BETWEEN RADIOGRAPHY AND MAGNETIC RESONANCE IMAGING FOR THE DETECTION OF SACROILIITIS IN THE INITIAL DIAGNOSIS OF AXIAL SPONDYLOARTHRITIS: A COST-EFFECTIVENESS STUDY. En 2019.
10. Mandl P, Navarro-Compán V, Terslev L, Aegerter P, van der Heijde D, D'Agostino MA, et al. EULAR recommendations for the use of imaging in the diagnosis and management of spondyloarthritis in clinical practice. *Ann Rheum Dis*. julio de 2015;74(7):1327-39.
11. Recommendations | Spondyloarthritis in over 16s: diagnosis and management | Guidance | NICE [Internet]. [citado 13 de febrero de 2020]. Disponible en:

<https://www.nice.org.uk/guidance/ng65/chapter/Recommendations#diagnosing-spondyloarthritis-in-specialist-care-settings>

12. EspoGuía 2018 [Internet]. SER. 2016 [citado 2 de enero de 2020]. Disponible en: <https://www.ser.es/espoguia/>
13. Rodríguez T, Gorelik N, Tamizuddin F, Gyftopoulos S, Beltran L, Malik F, et al. COMPARISON BETWEEN RADIOGRAPHY AND MAGNETIC RESONANCE IMAGING FOR THE DETECTION OF SACROILIITIS IN THE INITIAL DIAGNOSIS OF AXIAL SPONDYLOARTHRITIS: A COST-EFFECTIVENESS STUDY. En 2019.
14. Mandl P, Navarro-Compán V, Terslev L, Aegerter P, van der Heijde D, D'Agostino MA, et al. EULAR recommendations for the use of imaging in the diagnosis and management of spondyloarthritis in clinical practice. *Ann Rheum Dis*. julio de 2015;74(7):1327-39.
15. Recommendations | Spondyloarthritis in over 16s: diagnosis and management | Guidance | NICE [Internet]. [citado 13 de febrero de 2020]. Disponible en: <https://www.nice.org.uk/guidance/ng65/chapter/Recommendations#diagnosing-spondyloarthritis-in-specialist-care-settings>
16. Oliver A, Mossialos E. Equity of access to health care: outlining the foundations for action. *Journal of Epidemiology & Community Health* 2004;58:655-658

## Pregunta 3:

¿En pacientes adultos con Espondiloartritis Axial, se debe usar AINES (medicamentos antiinflamatorios no esteroideos) como la primera opción de tratamiento farmacológico considerando su eficacia (control enfermedad, remisión/baja actividad de síntomas, mejoría de escalas de funcionalidad) y seguridad (eventos adversos)?

|                     |                                                                                                                                              |
|---------------------|----------------------------------------------------------------------------------------------------------------------------------------------|
| <b>Población</b>    | Pacientes adultos con espondiloartritis axial.                                                                                               |
| <b>Intervención</b> | Medicamentos antiinflamatorios no esteroideos como primera opción de tratamiento farmacológico.                                              |
| <b>Comparación</b>  | No usarlo.                                                                                                                                   |
| <b>Desenlaces</b>   | Control de enfermedad /remisión/baja actividad de síntomas.<br><br>Mejoría de escalas de funcionalidad.<br><br>seguridad (eventos adversos). |

## Antecedentes:

La espondiloartritis axial (EspAax) es una enfermedad reumática inflamatoria dividida principalmente en dos presentaciones espondilitis anquilosante (espondiloartritis axial radiográfica) y espondiloartritis axial no radiográfica (1), cursa con una presentación clínica heterogénea, se caracteriza principalmente por dolor de espalda crónico asociado a rigidez que mejora con el ejercicio por lo que se define como de tipo inflamatorio; otras manifestaciones musculoesqueléticas son artritis, entesitis y dactilitis, también presenta manifestaciones extraarticulares como uveítis anterior, psoriasis y enfermedad inflamatoria intestinal (EII)(2).

Los antiinflamatorios no esteroideos (AINES) administrados a una dosis antiinflamatoria máxima(1) se han considerado como el pilar fundamental de la terapia farmacológica de esta patología, sin embargo, hay que tener en cuenta el riesgo/beneficio asociado a esta terapia ya que el perfil de efectos adversos asociado a esta terapia es amplio especialmente cuando se administran de forma crónica; existen datos de ensayos clínicos que han sugerido que el uso continuo de AINES en pacientes con PCR elevada da como resultado una progresión reducida del daño estructural en la columna en comparación con el solo uso bajo demanda (3, 4).

En cuanto al uso continuo de AINES como una terapia beneficiosa en pacientes con factores de riesgo de progresión con anquilosis (presencia de sindesmofitos , PCR elevada, enfermedad de larga data, inflamación de la columna vertebral en RM ) aún sigue siendo un tema de investigación (5).

## Resumen de la evidencia

Se realizó una búsqueda amplia y completa de la literatura publicada hasta febrero de 2020 siguiendo una estrategia de búsqueda y procesos de selección predefinidos (anexo 1).

Se seleccionó la revisión sistemática de la literatura (RSL) de Kroon realizada en el año 2015 (6), que abarca los estudios que evalúan esta pregunta hasta la fecha. Esta RSL incluyó 39 estudios (35 ECAs, dos cuasi ECAs y dos estudios de cohortes); y en el análisis cuantitativo para las comparaciones 29 ECAs y dos cuasi ECAs (n= 4356) para las siguientes comparaciones: AINEs tradicionales versus placebo, ciclooxigenasa – 2 (COX-2) vs placebo, COX – 2 vs AINEs tradicionales, AINES vs AINES, naproxeno vs otros AINES, dosis altas vs dosis bajas. Los desenlaces principales fueron dolor, índice de actividad (Bath Ankylosing Spondylitis Disease Activity Index (BASDAI)), índice de funcionalidad (Bath Ankylosing Spondylitis Functional Index (BASFI)), índice de metrología (Bath Ankylosing Spondylitis Metrology Index (BASMI)), progresión radiográfica, número de retiros por efectos adversos y efectos adversos serios. La calidad metodológica de esta RSL siguiendo el instrumento AMSTAR es buena.

Los estudios primarios incluidos en esta RSL en su mayoría tenían un riesgo de sesgo moderado (29 estudios con sesgo de selección poco claro; 24 estudios con adecuado el cegamiento; 25 estudios con bajo riesgo de sesgo de desgaste y 29 bajo riesgo de sesgo de reporte). Ningún estudio evaluó pacientes con espondiloartritis axial no radiológica.

Esta RSL se considera la mejor evidencia disponible teniendo en cuenta que los estudios contenidos en esta revisión son los que contemplan la mayoría de las guía basadas en la evidencia (1, 2, 7).

## Comparación de AINE tradicionales vs placebo

### Control de enfermedad /remisión/baja actividad de síntomas

Un total de 4 estudios (n=850) incluidos en esta revisión reportaron sobre este desenlace. Los AINEs tradicionales mostraron ser más beneficiosos que el placebo a las 6 semanas de tratamiento. El control del dolor medido con la escala visual análoga (EVA) de 100mm, varió de 57 a 64 y fue 16,5 puntos más bajo en el grupo de AINE (DMS 16,5; IC 95%: [-20,8 a -12,2]; NNT 4 IC 95%: [3 a 6]), indicando menor dolor. La calidad global de la evidencia se consideró alta.

Un estudio dentro de la revisión (n=190) reportó sobre la mejoría de la actividad de la enfermedad medida por el índice BASDAI . Los resultados muestran menor actividad de la enfermedad en el grupo tratado con AINES (DMS 17,5; IC 95%: [-23,1 a -11,8]; NNT 3 IC 95%: [2 a 4]), puntajes menores indican menor actividad de la enfermedad. La calidad de la evidencia para este desenlace es moderada debido a falta de precisión potencial, dado que los datos son de un solo estudio.

### Mejoría de escalas de funcionalidad

Dos estudios (n=356) reportaron sobre este desenlace medido con la escala BASFI. Los resultados indican mejoría de la funcionalidad con AINEs (BASFI en el grupo control fue 50,0 en una escala de 100 puntos y fue 9,1 puntos menor en el grupo de AINE (DMS 9,1; IC 95% [-13,0 a -5,1]); NNT 5 IC 95% [3 a 8]) puntajes menores indican mejor funcionalidad. La calidad de esta evidencia fue alta.

### Seguridad (eventos adversos)

En la RSL (6) se encontraron cinco estudios de alta calidad (n=1165) y tres estudios de moderada calidad (n=671), estos estudios mostraron que la suspensión de los medicamentos por efectos adversos (EA) y efectos adversos serios (EAS) no difirió significativamente entre los grupos de placebo y AINEs después de 12 semanas (para EA riesgo relativo (RR) 0,75; IC 95% [0,46 a 1,21] y para EAS RR 1,69; IC 95% [0,36 a 7,97]). Los tres estudios aportan evidencia de moderada calidad debido a la imprecisión potencial.

## **Comparación de inhibidores de la COX-2 AINEs vs placebo**

### **Control de enfermedad/ remisión/baja actividad de síntomas**

Los AINEs inhibidores de la COX-2 mostraron ser más eficaces que el placebo a las 6 semanas. Dos estudios (n= 349) mostraron mejor alivio del dolor con COX-2 (dolor en el grupo control 64 puntos y 21,7 puntos más bajo en el grupo COX-2; IC 95% [35,9 a -7,4], NNT 3 IC 95% [2 a 24]). La calidad de la evidencia para este desenlace es alta.

Un estudio (n= 193) mostró mejoría de la actividad de la enfermedad con COX-2 (BASDAI en el grupo control 54,7 puntos y 22 puntos más bajo en el grupo de COX-2 (DSM 22; IC 95%: [-27,4 a -16,6]); NNT 2 IC 95%: (1 a 3)). La calidad de la evidencia es moderada por potencial imprecisión ya que la evidencia viene de un solo estudio.

### **Mejoría de escalas de funcionalidad**

Dos estudios (n=349) mostraron mejoría de la función con COX - 2 (BASFI en el grupo control 50,0 puntos y fue 13,4 puntos más bajo en el grupo COX-2 (DSM -13,4 IC 95% [-17,4 a -9,5]); NNT 3 IC 95% [2 a 4]). La calidad de la evidencia es alta.

### **Seguridad (eventos adversos)**

Tres estudios (n=669) indicaron que la suspensión de medicamento debido a efectos adversos y eventos adversos serios no difirió significativamente entre el grupo placebo y el grupo COX-2 después de 12 semanas (RR 2,14; IC 95%: 0,36 a 12,56; y RR 0,92; IC 95%: 0,14 a 6,21; respectivamente). La calidad de la evidencia fue baja y moderada por imprecisión potencial y heterogeneidad.

### **Preferencia de pacientes**

No se encontró evidencia sobre preferencias de los pacientes sobre este tipo de medicamentos y desenlaces asociados.

### **Recursos requeridos y costos**

Se realizó una búsqueda de la literatura de ensayos clínicos para espondiloartritis con filtros económicos. Se identificó un estudio de costo-utilidad realizado en Reino Unido para la guía de diagnóstico y tratamiento de la espondiloartritis, realizada por el NICE 2017 (7). La calidad metodológica de este análisis económico es aceptable de acuerdo con la lista de chequeo de Drumond. La evidencia de efectividad que nutrió el modelo económico fue extraída de dos estudios principalmente (Jansen. 2007; Jansen 2010)(8) y (9).

Jansen 2007 (8) comparó etoricoxib con AINES no selectivos como primera línea de tratamiento en personas con espondilitis anquilosante en Reino Unido. Dentro de los efectos del tratamiento solo se consideró suspensión del tratamiento y no se encontraron desenlaces de alivio del dolor o progresión de la enfermedad, los estudios de etoricoxib no reflejan la población con espondilitis anquilosante de Reino Unido por lo que se realizó un supuesto de que era así.

Los costos de los medicamentos fueron ponderados por el uso promedio dentro de cada clase, pero no se detallaron los AINES no selectivos utilizados ni el uso promedio. Los datos de utilidad de referencia se mapearon dos veces desde BASFI a SF-36 a utilidad, mientras que los cambios de utilidad (es decir, el efecto del tratamiento) de los tratamientos cambiantes debido a la falta de eficacia y los eventos adversos (resultados clave) se asumieron parcialmente.

En 1 año de tratamiento, se encontró que etoricoxib era costo-efectivo (ICER £ 6,200 / QALY; para un umbral de disposición a pagar de £20.000/QALY) en comparación con los AINES no selectivos en el 77% de las iteraciones del modelo. Sin embargo, esto era sensible a los costos de los AINES no selectivos: si se prescribía el medicamento más económico de cada clase, los beneficios de costo de etoricoxib se reducían (ICER £ 16,200 / QALY, costo efectivo en 59% de las iteraciones (umbral de £ 20,000 / QALY).

Usando un modelo expandido, Jansen et al. 2010 (9) compararon etoricoxib con celecoxib, naproxeno y diclofenaco para el tratamiento de primera línea para personas con espondilitis anquilosante en el Reino Unido. Los efectos del tratamiento modelados fueron la progresión de la enfermedad (pero no el dolor) y se basaron en una revisión sistemática y un metaanálisis en red (para el cual los ECA incluidos coincidieron con el subconjunto que cubre estos comparadores que se usaron en esta pregunta de revisión). Los eventos adversos se tomaron de una población más amplia de artritis.

Los costos de los medicamentos se basaron en el medicamento formulado más comúnmente dentro de cada clase. Los costos de eventos adversos solo se aplicaron en el primer año. Los datos de utilidad se mapearon directamente de BASFI y BASDAI, se asumieron parcialmente los cambios de utilidad de los tratamientos cambiados debido a la falta de eficacia y los eventos adversos.

Durante el horizonte temporal, etoricoxib se encontró dominante (produce menor costo y mayor QALYs) celecoxib, naproxeno y diclofenaco fueron costo-efectivos en un 99.8% de las iteraciones para el umbral establecido en UK.



## DE LA EVIDENCIA A LAS DECISIONES

| PREGUNTA               |                                                                                                                               |
|------------------------|-------------------------------------------------------------------------------------------------------------------------------|
| POBLACION              | Pacientes adultos con espondiloartritis axial                                                                                 |
| INTERVENCIÓN           | Antiinflamatorios no esteroideos                                                                                              |
| COMPARACIÓN            | Placebo                                                                                                                       |
| DESENLACES PRINCIPALES | control de enfermedad /remisión/baja actividad de síntomas, mejoría de escalas de funcionalidad, Seguridad (eventos adversos) |
| ÁMBITO                 | Hospitalario y ambulatorio                                                                                                    |
| PERSPECTIVA            | Del grupo desarrollador de la Guía                                                                                            |
| CONFLICTO DE INTERÉS:  | No se declara ningún conflicto de interés                                                                                     |

## EVALUACIÓN

| Problema                                                                                                                                                                    |                                                                                                                                                                                                                                                                                                                                                                                                                                                                                                                                                                                                                                                                                                                                                                                                                                                                                                                                                                        |                             |
|-----------------------------------------------------------------------------------------------------------------------------------------------------------------------------|------------------------------------------------------------------------------------------------------------------------------------------------------------------------------------------------------------------------------------------------------------------------------------------------------------------------------------------------------------------------------------------------------------------------------------------------------------------------------------------------------------------------------------------------------------------------------------------------------------------------------------------------------------------------------------------------------------------------------------------------------------------------------------------------------------------------------------------------------------------------------------------------------------------------------------------------------------------------|-----------------------------|
| Es el problema una prioridad?                                                                                                                                               |                                                                                                                                                                                                                                                                                                                                                                                                                                                                                                                                                                                                                                                                                                                                                                                                                                                                                                                                                                        |                             |
| JUICIO                                                                                                                                                                      | EVIDENCIA DE LA INVESTIGACION                                                                                                                                                                                                                                                                                                                                                                                                                                                                                                                                                                                                                                                                                                                                                                                                                                                                                                                                          | CONSIDERACIONES ADICIONALES |
| <ul style="list-style-type: none"> <li>○ No</li> <li>○ Probablemente No</li> <li>○ Probablemente Si</li> <li>○ Si</li> <li>○ Es variable</li> <li>○ No se conoce</li> </ul> | <p>La espondiloartritis axial (EspAax) es una enfermedad reumática inflamatoria dividida principalmente en dos presentaciones espondilitis anquilosante (espondiloartritis axial radiográfica) y espondiloartritis axial no radiográfica (1), cursa con una presentación clínica heterogénea, se caracteriza principalmente por dolor de espalda crónico asociado a rigidez que mejora con el ejercicio por lo que se define como de tipo inflamatorio; otras manifestaciones musculoesqueléticas son artritis, entesitis y dactilitis. Presenta manifestaciones extraarticulares como uveítis anterior, psoriasis y enfermedad inflamatoria intestinal (EII)(2).</p> <p>Los antiinflamatorios no esteroideos (AINE) administrados a una dosis antiinflamatoria máxima (EULAR2010) se han considerado como el pilar fundamental de la terapia farmacológica de esta patología, sin embargo, hay que tener en cuenta el riesgo/beneficio asociado a esta terapia ya</p> |                             |

|  |                                                                                                                                                                                                                                                                                                                                                                                                                                                                                                                                                                                                                                                                       |
|--|-----------------------------------------------------------------------------------------------------------------------------------------------------------------------------------------------------------------------------------------------------------------------------------------------------------------------------------------------------------------------------------------------------------------------------------------------------------------------------------------------------------------------------------------------------------------------------------------------------------------------------------------------------------------------|
|  | <p>que el perfil de efectos adversos asociado a esta terapia es amplio especialmente cuando se administran de forma crónica; existen , datos de ensayos clínicos que han sugerido que el uso continuo de AINE en pacientes con PCR elevada da como resultado una progresión reducida del daño estructural en la columna en comparación solo para uso bajo demanda (3, 4).</p> <p>En cuanto al uso continuo de AINEs como una terapia beneficiosa en pacientes con factores de riesgo de progresión (presencia de sindesmofitas, PCR elevada, enfermedad de larga data, inflamación de la columna vertebral en IRM) aún sigue siendo un tema de investigación (5).</p> |
|--|-----------------------------------------------------------------------------------------------------------------------------------------------------------------------------------------------------------------------------------------------------------------------------------------------------------------------------------------------------------------------------------------------------------------------------------------------------------------------------------------------------------------------------------------------------------------------------------------------------------------------------------------------------------------------|

Efectos deseables (beneficios de la opción a recomendar)

¿Qué tan sustanciales son los efectos deseables de la opción?

| JUICIO                                                                                                                                     | EVIDENCIA DE LA INVESTIGACION                                                                                                                                                                                                                                                                                                                                                                                                                                                                                                                                                                                                                                                                                                                                                                                                                                                                                                                                                                                                                                                                                                                                                                                                                                                                                                                                                                                                                                                                                                                                                                        | CONSIDERACIONES ADICIONALES |                                            |                                                        |                                                                          |                                         |                          |                                         |                                 |                                                                                        |                                |              |  |                                                        |                                                                          |                                                |                    |                  |   |                                          |                                                |                                                                       |                     |              |   |                                       |                                                         |                                                                                                                                                                                                                                                                                                                           |
|--------------------------------------------------------------------------------------------------------------------------------------------|------------------------------------------------------------------------------------------------------------------------------------------------------------------------------------------------------------------------------------------------------------------------------------------------------------------------------------------------------------------------------------------------------------------------------------------------------------------------------------------------------------------------------------------------------------------------------------------------------------------------------------------------------------------------------------------------------------------------------------------------------------------------------------------------------------------------------------------------------------------------------------------------------------------------------------------------------------------------------------------------------------------------------------------------------------------------------------------------------------------------------------------------------------------------------------------------------------------------------------------------------------------------------------------------------------------------------------------------------------------------------------------------------------------------------------------------------------------------------------------------------------------------------------------------------------------------------------------------------|-----------------------------|--------------------------------------------|--------------------------------------------------------|--------------------------------------------------------------------------|-----------------------------------------|--------------------------|-----------------------------------------|---------------------------------|----------------------------------------------------------------------------------------|--------------------------------|--------------|--|--------------------------------------------------------|--------------------------------------------------------------------------|------------------------------------------------|--------------------|------------------|---|------------------------------------------|------------------------------------------------|-----------------------------------------------------------------------|---------------------|--------------|---|---------------------------------------|---------------------------------------------------------|---------------------------------------------------------------------------------------------------------------------------------------------------------------------------------------------------------------------------------------------------------------------------------------------------------------------------|
| <div><div>○ Triviales</div><div>○ Pequeños</div><div>○ Moderados</div><div>○ Grandes</div><div>○ Varían</div><div>○ No se sabe</div></div> | <div>AINES tradicionales comparado con placebo para espondiloartritis axiales</div> <table><tr><th rowspan="2">Desenlaces</th><th rowspan="2">Nº de participantes (estudios) Seguimiento</th><th rowspan="2">Certeza de la evidencia (GRADE)</th><th rowspan="2">Efecto Relativo (95% IC)</th><th colspan="2">Efectos absolutos anticipados* (95% IC)</th></tr><tr><th>Riesgo con el placebo</th><th>Diferencia de Riesgos con AINES</th></tr><tr><td>Dolor con EVA<br/>Escala de 0 a 100 mm (más alto es peor)<br/>seguimiento: 2 a 6 semanas</td><td>859<br/>(4 ECAs)<sup>1,2</sup></td><td>⊕⊕⊕⊕<br/>ALTA</td><td></td><td>puntuación promedio de dolor<br/>61 puntos <sup>1</sup></td><td>puntuación promedio de dolor<br/>16.5 puntos menos<br/>(12,2 a 20,8 menos)</td></tr><tr><td>BASDAI<br/>Escala de 0 a 100 (más alto es peor)</td><td>190<br/>(1 estudio)</td><td>⊕⊕⊕○<br/>MODERADA</td><td>-</td><td>El promedio de BASDAI fue<br/>54,7 puntos</td><td>El promedio de BASDAI fue<br/>17,5 puntos menor</td></tr><tr><td>BASFI<br/>Escala de 0 a 100 (más alto es peor) Seguimiento a 6 semanas</td><td>356<br/>(2 estudios)</td><td>⊕⊕⊕⊕<br/>ALTA</td><td>-</td><td>El promedio de BASFI fue<br/>50 puntos</td><td>El promedio de BASFI fue<br/>9,1 puntos (5,1 a 13 menor)</td></tr></table> <div>Kroon FP, van der Burg LR, Ramiro S, Landewe RB, Buchbinder R, Falzon L, et al. Non-steroidal anti-inflammatory drugs (NSAIDs) for axial spondyloarthritis (ankylosing spondylitis and non-radiographic axial spondyloarthritis). Cochrane Database Syst Rev. 2015(7):CD010952.</div> | Desenlaces                  | Nº de participantes (estudios) Seguimiento | Certeza de la evidencia (GRADE)                        | Efecto Relativo (95% IC)                                                 | Efectos absolutos anticipados* (95% IC) |                          | Riesgo con el placebo                   | Diferencia de Riesgos con AINES | Dolor con EVA<br>Escala de 0 a 100 mm (más alto es peor)<br>seguimiento: 2 a 6 semanas | 859<br>(4 ECAs) <sup>1,2</sup> | ⊕⊕⊕⊕<br>ALTA |  | puntuación promedio de dolor<br>61 puntos <sup>1</sup> | puntuación promedio de dolor<br>16.5 puntos menos<br>(12,2 a 20,8 menos) | BASDAI<br>Escala de 0 a 100 (más alto es peor) | 190<br>(1 estudio) | ⊕⊕⊕○<br>MODERADA | - | El promedio de BASDAI fue<br>54,7 puntos | El promedio de BASDAI fue<br>17,5 puntos menor | BASFI<br>Escala de 0 a 100 (más alto es peor) Seguimiento a 6 semanas | 356<br>(2 estudios) | ⊕⊕⊕⊕<br>ALTA | - | El promedio de BASFI fue<br>50 puntos | El promedio de BASFI fue<br>9,1 puntos (5,1 a 13 menor) | <div>Para control de enfermedad /remisión/baja actividad de síntomas medido por dolor (EVA) se encontró en los datos agrupados.</div> <div>Diferencia porcentual absoluta: 17% más bajo (12% a 21% menos)</div> <div>Cambio porcentual relativo desde el basal: 21% menor (16% a 27% menos)</div> <div>NNT:4(3 a 6)</div> |
| Desenlaces                                                                                                                                 | Nº de participantes (estudios) Seguimiento                                                                                                                                                                                                                                                                                                                                                                                                                                                                                                                                                                                                                                                                                                                                                                                                                                                                                                                                                                                                                                                                                                                                                                                                                                                                                                                                                                                                                                                                                                                                                           |                             |                                            |                                                        |                                                                          | Certeza de la evidencia (GRADE)         | Efecto Relativo (95% IC) | Efectos absolutos anticipados* (95% IC) |                                 |                                                                                        |                                |              |  |                                                        |                                                                          |                                                |                    |                  |   |                                          |                                                |                                                                       |                     |              |   |                                       |                                                         |                                                                                                                                                                                                                                                                                                                           |
|                                                                                                                                            |                                                                                                                                                                                                                                                                                                                                                                                                                                                                                                                                                                                                                                                                                                                                                                                                                                                                                                                                                                                                                                                                                                                                                                                                                                                                                                                                                                                                                                                                                                                                                                                                      | Riesgo con el placebo       | Diferencia de Riesgos con AINES            |                                                        |                                                                          |                                         |                          |                                         |                                 |                                                                                        |                                |              |  |                                                        |                                                                          |                                                |                    |                  |   |                                          |                                                |                                                                       |                     |              |   |                                       |                                                         |                                                                                                                                                                                                                                                                                                                           |
| Dolor con EVA<br>Escala de 0 a 100 mm (más alto es peor)<br>seguimiento: 2 a 6 semanas                                                     | 859<br>(4 ECAs) <sup>1,2</sup>                                                                                                                                                                                                                                                                                                                                                                                                                                                                                                                                                                                                                                                                                                                                                                                                                                                                                                                                                                                                                                                                                                                                                                                                                                                                                                                                                                                                                                                                                                                                                                       | ⊕⊕⊕⊕<br>ALTA                |                                            | puntuación promedio de dolor<br>61 puntos <sup>1</sup> | puntuación promedio de dolor<br>16.5 puntos menos<br>(12,2 a 20,8 menos) |                                         |                          |                                         |                                 |                                                                                        |                                |              |  |                                                        |                                                                          |                                                |                    |                  |   |                                          |                                                |                                                                       |                     |              |   |                                       |                                                         |                                                                                                                                                                                                                                                                                                                           |
| BASDAI<br>Escala de 0 a 100 (más alto es peor)                                                                                             | 190<br>(1 estudio)                                                                                                                                                                                                                                                                                                                                                                                                                                                                                                                                                                                                                                                                                                                                                                                                                                                                                                                                                                                                                                                                                                                                                                                                                                                                                                                                                                                                                                                                                                                                                                                   | ⊕⊕⊕○<br>MODERADA            | -                                          | El promedio de BASDAI fue<br>54,7 puntos               | El promedio de BASDAI fue<br>17,5 puntos menor                           |                                         |                          |                                         |                                 |                                                                                        |                                |              |  |                                                        |                                                                          |                                                |                    |                  |   |                                          |                                                |                                                                       |                     |              |   |                                       |                                                         |                                                                                                                                                                                                                                                                                                                           |
| BASFI<br>Escala de 0 a 100 (más alto es peor) Seguimiento a 6 semanas                                                                      | 356<br>(2 estudios)                                                                                                                                                                                                                                                                                                                                                                                                                                                                                                                                                                                                                                                                                                                                                                                                                                                                                                                                                                                                                                                                                                                                                                                                                                                                                                                                                                                                                                                                                                                                                                                  | ⊕⊕⊕⊕<br>ALTA                | -                                          | El promedio de BASFI fue<br>50 puntos                  | El promedio de BASFI fue<br>9,1 puntos (5,1 a 13 menor)                  |                                         |                          |                                         |                                 |                                                                                        |                                |              |  |                                                        |                                                                          |                                                |                    |                  |   |                                          |                                                |                                                                       |                     |              |   |                                       |                                                         |                                                                                                                                                                                                                                                                                                                           |

Efectos Indeseables

¿Qué tan sustanciales son los efectos indeseables que se pueden anticipar?

| JUICIO                                                                                                                                     | EVIDENCIA DE LA INVESTIGACION                                                                                                                                                                                                                                                                                                                                                                                                                                                                                                                                                                                                                                                                                                                                                                                                                                                                                                                                                                                                                                                                                                                                                                                                                    | CONSIDERACIONES ADICIONALES |                                            |                                 |                           |                                         |                          |                                         |                                 |                                                                      |                                      |              |                       |             |                           |                                                                      |                     |                  |                       |            |                        |  |
|--------------------------------------------------------------------------------------------------------------------------------------------|--------------------------------------------------------------------------------------------------------------------------------------------------------------------------------------------------------------------------------------------------------------------------------------------------------------------------------------------------------------------------------------------------------------------------------------------------------------------------------------------------------------------------------------------------------------------------------------------------------------------------------------------------------------------------------------------------------------------------------------------------------------------------------------------------------------------------------------------------------------------------------------------------------------------------------------------------------------------------------------------------------------------------------------------------------------------------------------------------------------------------------------------------------------------------------------------------------------------------------------------------|-----------------------------|--------------------------------------------|---------------------------------|---------------------------|-----------------------------------------|--------------------------|-----------------------------------------|---------------------------------|----------------------------------------------------------------------|--------------------------------------|--------------|-----------------------|-------------|---------------------------|----------------------------------------------------------------------|---------------------|------------------|-----------------------|------------|------------------------|--|
| <div><div>○ Triviales</div><div>○ Pequeños</div><div>○ Moderados</div><div>○ Grandes</div><div>○ Varían</div><div>○ No se sabe</div></div> | <div>Comparación de AINES tradicionales comparado con placebo para espondiloartritis axiales</div> <table><tr><th rowspan="2">Desenlaces</th><th rowspan="2">Nº de participantes (estudios) Seguimiento</th><th rowspan="2">Certeza de la evidencia (GRADE)</th><th rowspan="2">Efecto Relativo (95% IC)</th><th colspan="2">Efectos absolutos anticipados* (95% IC)</th></tr><tr><th>Riesgo con el placebo</th><th>Diferencia de Riesgos con AINES</th></tr><tr><td>suspensiones por eventos adversos<br/><br/>seguimiento: 2 a 12 semanas</td><td>1165<sup>5,11</sup><br/>(5 estudios)</td><td>⊕⊕⊕⊕<br/>ALTA</td><td>RR 0,75 (0.46 a 1.21)</td><td>52 por 1000</td><td>39 por 1,000<br/>(24 a 63)</td></tr><tr><td>Número de eventos adversos serios<br/><br/>Seguimiento: 6 a 12 semanas</td><td>671<br/>(3 estudios)</td><td>⊕⊕⊕○<br/>MODERADA</td><td>RR 1,69 (0,36 a 7,97)</td><td>2 por 1000</td><td>3 por 1000<br/>(1 a 16)</td></tr></table> <div>Kroon FP, van der Burg LR, Ramiro S, Landewe RB, Buchbinder R, Falzon L, et al. Non-steroidal anti-inflammatory drugs (NSAIDs) for axial spondyloarthritis (ankylosing spondylitis and non-radiographic axial spondyloarthritis). Cochrane Database Syst Rev. 2015(7):CD010952.</div> | Desenlaces                  | Nº de participantes (estudios) Seguimiento | Certeza de la evidencia (GRADE) | Efecto Relativo (95% IC)  | Efectos absolutos anticipados* (95% IC) |                          | Riesgo con el placebo                   | Diferencia de Riesgos con AINES | suspensiones por eventos adversos<br><br>seguimiento: 2 a 12 semanas | 1165 <sup>5,11</sup><br>(5 estudios) | ⊕⊕⊕⊕<br>ALTA | RR 0,75 (0.46 a 1.21) | 52 por 1000 | 39 por 1,000<br>(24 a 63) | Número de eventos adversos serios<br><br>Seguimiento: 6 a 12 semanas | 671<br>(3 estudios) | ⊕⊕⊕○<br>MODERADA | RR 1,69 (0,36 a 7,97) | 2 por 1000 | 3 por 1000<br>(1 a 16) |  |
| Desenlaces                                                                                                                                 | Nº de participantes (estudios) Seguimiento                                                                                                                                                                                                                                                                                                                                                                                                                                                                                                                                                                                                                                                                                                                                                                                                                                                                                                                                                                                                                                                                                                                                                                                                       |                             |                                            |                                 |                           | Certeza de la evidencia (GRADE)         | Efecto Relativo (95% IC) | Efectos absolutos anticipados* (95% IC) |                                 |                                                                      |                                      |              |                       |             |                           |                                                                      |                     |                  |                       |            |                        |  |
|                                                                                                                                            |                                                                                                                                                                                                                                                                                                                                                                                                                                                                                                                                                                                                                                                                                                                                                                                                                                                                                                                                                                                                                                                                                                                                                                                                                                                  | Riesgo con el placebo       | Diferencia de Riesgos con AINES            |                                 |                           |                                         |                          |                                         |                                 |                                                                      |                                      |              |                       |             |                           |                                                                      |                     |                  |                       |            |                        |  |
| suspensiones por eventos adversos<br><br>seguimiento: 2 a 12 semanas                                                                       | 1165 <sup>5,11</sup><br>(5 estudios)                                                                                                                                                                                                                                                                                                                                                                                                                                                                                                                                                                                                                                                                                                                                                                                                                                                                                                                                                                                                                                                                                                                                                                                                             | ⊕⊕⊕⊕<br>ALTA                | RR 0,75 (0.46 a 1.21)                      | 52 por 1000                     | 39 por 1,000<br>(24 a 63) |                                         |                          |                                         |                                 |                                                                      |                                      |              |                       |             |                           |                                                                      |                     |                  |                       |            |                        |  |
| Número de eventos adversos serios<br><br>Seguimiento: 6 a 12 semanas                                                                       | 671<br>(3 estudios)                                                                                                                                                                                                                                                                                                                                                                                                                                                                                                                                                                                                                                                                                                                                                                                                                                                                                                                                                                                                                                                                                                                                                                                                                              | ⊕⊕⊕○<br>MODERADA            | RR 1,69 (0,36 a 7,97)                      | 2 por 1000                      | 3 por 1000<br>(1 a 16)    |                                         |                          |                                         |                                 |                                                                      |                                      |              |                       |             |                           |                                                                      |                     |                  |                       |            |                        |  |

## Certeza en la Evidencia

¿Cuál es la certeza en la evidencia global sobre los efectos de la opción a recomendar?

| JUICIO                                                                                                                                                   | EVIDENCIA DE LA INVESTIGACION                                                                                                                                                                                                                                                                                                                                                                                                                  | CONSIDERACIONES ADICIONALES     |                      |                                 |                                                            |         |                               |                                     |         |              |                              |         |                  |                                                                                        |
|----------------------------------------------------------------------------------------------------------------------------------------------------------|------------------------------------------------------------------------------------------------------------------------------------------------------------------------------------------------------------------------------------------------------------------------------------------------------------------------------------------------------------------------------------------------------------------------------------------------|---------------------------------|----------------------|---------------------------------|------------------------------------------------------------|---------|-------------------------------|-------------------------------------|---------|--------------|------------------------------|---------|------------------|----------------------------------------------------------------------------------------|
| <ul style="list-style-type: none"> <li>○ Muy baja</li> <li>○ Baja</li> <li>○ Moderada</li> <li>○ Alta</li> <li>○ No se identificaron estudios</li> </ul> | <table> <tr> <th>Desenlace</th><th>Importancia Relativa</th><th>Certeza de la evidencia (GRADE)</th></tr> <tr> <td>control de enfermedad /remisión/baja actividad de síntomas</td><td>CRITICA</td><td>⊕⊕⊕○<br/>MODERADA <sup>1</sup></td></tr> <tr> <td>mejoría de escalas de funcionalidad</td><td>CRITICA</td><td>⊕⊕⊕⊕<br/>ALTA</td></tr> <tr> <td>seguridad (eventos adversos)</td><td>CRITICA</td><td>⊕⊕⊕○<br/>MODERADA</td></tr> </table> | Desenlace                       | Importancia Relativa | Certeza de la evidencia (GRADE) | control de enfermedad /remisión/baja actividad de síntomas | CRITICA | ⊕⊕⊕○<br>MODERADA <sup>1</sup> | mejoría de escalas de funcionalidad | CRITICA | ⊕⊕⊕⊕<br>ALTA | seguridad (eventos adversos) | CRITICA | ⊕⊕⊕○<br>MODERADA | 1. La evidencia que evalúa la actividad de los síntomas tiene potencial de imprecisión |
| Desenlace                                                                                                                                                | Importancia Relativa                                                                                                                                                                                                                                                                                                                                                                                                                           | Certeza de la evidencia (GRADE) |                      |                                 |                                                            |         |                               |                                     |         |              |                              |         |                  |                                                                                        |
| control de enfermedad /remisión/baja actividad de síntomas                                                                                               | CRITICA                                                                                                                                                                                                                                                                                                                                                                                                                                        | ⊕⊕⊕○<br>MODERADA <sup>1</sup>   |                      |                                 |                                                            |         |                               |                                     |         |              |                              |         |                  |                                                                                        |
| mejoría de escalas de funcionalidad                                                                                                                      | CRITICA                                                                                                                                                                                                                                                                                                                                                                                                                                        | ⊕⊕⊕⊕<br>ALTA                    |                      |                                 |                                                            |         |                               |                                     |         |              |                              |         |                  |                                                                                        |
| seguridad (eventos adversos)                                                                                                                             | CRITICA                                                                                                                                                                                                                                                                                                                                                                                                                                        | ⊕⊕⊕○<br>MODERADA                |                      |                                 |                                                            |         |                               |                                     |         |              |                              |         |                  |                                                                                        |

## Valores de los pacientes

¿Hay variación o poca certeza sobre cómo valoran las personas/los pacientes los desenlaces principales?

| JUICIO                                                                                                                                                                                                                                                                                           | EVIDENCIA DE LA INVESTIGACION | CONSIDERACIONES ADICIONALES |
|--------------------------------------------------------------------------------------------------------------------------------------------------------------------------------------------------------------------------------------------------------------------------------------------------|-------------------------------|-----------------------------|
| <ul style="list-style-type: none"> <li>○ Variabilidad o incertidumbre importante</li> <li>○ Posiblemente hay variabilidad o incertidumbre importante</li> <li>○ Posiblemente No hay variabilidad o incertidumbre importante</li> <li>○ No hay variabilidad o incertidumbre importante</li> </ul> | No se encontró evidencia      |                             |

## Balance de los efectos

¿El balance entre los efectos deseables e indeseables favorece la opción o el comparador?

| JUICIO                                                                                                                                                                                                                                                                                                                 | EVIDENCIA DE LA INVESTIGACION                                                                                                                                                                                                                                                                                                                                                                                                                                                                                                                                                                                                                                                                                                                                                                                                                                                                                                                                                                                                                                                                                                                                                                                                                                                                                                                                                    | CONSIDERACIONES ADICIONALES |
|------------------------------------------------------------------------------------------------------------------------------------------------------------------------------------------------------------------------------------------------------------------------------------------------------------------------|----------------------------------------------------------------------------------------------------------------------------------------------------------------------------------------------------------------------------------------------------------------------------------------------------------------------------------------------------------------------------------------------------------------------------------------------------------------------------------------------------------------------------------------------------------------------------------------------------------------------------------------------------------------------------------------------------------------------------------------------------------------------------------------------------------------------------------------------------------------------------------------------------------------------------------------------------------------------------------------------------------------------------------------------------------------------------------------------------------------------------------------------------------------------------------------------------------------------------------------------------------------------------------------------------------------------------------------------------------------------------------|-----------------------------|
| <ul style="list-style-type: none"> <li>○ Favorece al comparador</li> <li>○ Probablemente favorece al comparador</li> <li>○ No favorece al comparador ni a la opción en evaluación</li> <li>○ Probablemente favorece a la opción</li> <li>○ Favorece la intervención</li> <li>○ Varían</li> <li>○ No se sabe</li> </ul> | <p>Se considera que el balance entre los efectos deseables y no deseables favorece el uso de la intervención teniendo en cuenta la evidencia que existe para el uso de AINES en espondiloartritis axial impactando en varios desenlaces de forma favorable con un perfil de seguridad (presencia de eventos adversos asociados) adecuado.</p> <p>Se realizó un metaanálisis de ECAs para realizar una comparación indirecta de AINES en el tratamiento de la EA. Se incluyó un total de 9 ECAs que se enfocaron en 6 AINES</p> <p>(etoricoxib, celecoxib, meloxicam, diclofenac, naproxen and beta-D-mannuronic acid (M2000)). Los resultados de este metaanálisis revelan que todos los AINES fueron significativamente más efectivos en reducir la severidad del dolor que el placebo (MDs entre -17.49 y -25.99). De igual forma, mejorías en PGA, BASFI y ASAS20 se determinaron en pacientes recibiendo AINES. Adicionalmente, etoricoxib se clasificó como el tratamiento más eficaz para pacientes con AS. Con respecto a la seguridad, no se encontraron diferencias significativas entre los AINES y el placebo en términos de total de Eventos adversos, abandonos debidos a eventos serios o eventos adversos serios. Sin embargo, los pacientes tratados con diclofenaco y naproxeno tuvieron un mayor riesgo de eventos GI que quienes recibieron placebo. (10)</p> |                             |

## Recursos requeridos

¿Qué tan grandes son los requisitos de recursos (costos)?

| JUICIO                                                                                                                                                                                                                                       | EVIDENCIA DE LA INVESTIGACION                                                                                                                                                                                                                                                                                                                                                                                                                                                                                                                                                                                                                                                                                                                                                                                                                                           | CONSIDERACIONES ADICIONALES |
|----------------------------------------------------------------------------------------------------------------------------------------------------------------------------------------------------------------------------------------------|-------------------------------------------------------------------------------------------------------------------------------------------------------------------------------------------------------------------------------------------------------------------------------------------------------------------------------------------------------------------------------------------------------------------------------------------------------------------------------------------------------------------------------------------------------------------------------------------------------------------------------------------------------------------------------------------------------------------------------------------------------------------------------------------------------------------------------------------------------------------------|-----------------------------|
| <ul style="list-style-type: none"> <li>○ Grandes costos</li> <li>○ Costos moderados</li> <li>○ no significantes costos ni ahorros</li> <li>○ Moderados ahorros</li> <li>○ Grandes ahorros</li> <li>○ Varían</li> <li>○ No se sabe</li> </ul> | <p>Se encontró un estudio de costo efectividad realizado por el grupo NICE (Reino Unido) para la guía de espondiloartritis en el año 2017. Durante 1 año, se encontró que etoricoxib era costo efectivo (ICER £ 6,200 / QALY) en comparación con los AINES no selectivos en el 77% de las iteraciones (con un umbral de £ 20,000 / QALY). Sin embargo, esto era sensible a los costos de los AINES no selectivos: si se prescribía el medicamento más económico de cada clase, los beneficios de costo de etoricoxib se reducían (ICER £ 16,200 / QALY, costo efectivo en 59% de las iteraciones en un umbral de £ 20,000 / QALY).</p> <p>Durante el horizonte temporal, etoricoxib se encontró dominante (produce menor costo y mayor QALYs) celecoxib, naproxeno and diclofenaco y fue costo efectivo en un 99.8% de las iteraciones a un umbral de £20,000/QALY.</p> |                             |

|                                                                                                                                                                                                                                                                                                                            |                                                                                                                                                                                                                                                                                                                                                                                                                                                                                                                                                                            |                                    |
|----------------------------------------------------------------------------------------------------------------------------------------------------------------------------------------------------------------------------------------------------------------------------------------------------------------------------|----------------------------------------------------------------------------------------------------------------------------------------------------------------------------------------------------------------------------------------------------------------------------------------------------------------------------------------------------------------------------------------------------------------------------------------------------------------------------------------------------------------------------------------------------------------------------|------------------------------------|
|                                                                                                                                                                                                                                                                                                                            | <p>1. NICE. Spondyloarthritis in over 16s: diagnosis and management 2017.</p> <p>2. Jansen JP, Pellissier J, Choy EH, Ostor A, Nash JT, Bacon P, et al. Economic evaluation of etoricoxib versus non-selective NSAIDs in the treatment of ankylosing spondylitis in the UK. Current Medical Research and Opinion. 2007;23(12):3069-78.</p> <p>3. Jansen JP, Gaugris S, Choy EH, Ostor A, Nash JT, Stam W. Cost effectiveness of etoricoxib versus celecoxib and non-selective NSAIDs in the treatment of ankylosing spondylitis. Pharmacoeconomics. 2010;28(4):323-44.</p> |                                    |
| <b>Equidad</b><br>¿La implementación de la opción, tendrá impacto en la equidad?                                                                                                                                                                                                                                           |                                                                                                                                                                                                                                                                                                                                                                                                                                                                                                                                                                            |                                    |
| <b>JUICIO</b>                                                                                                                                                                                                                                                                                                              | <b>EVIDENCIA DE LA INVESTIGACION</b>                                                                                                                                                                                                                                                                                                                                                                                                                                                                                                                                       | <b>CONSIDERACIONES ADICIONALES</b> |
| <input type="radio"/> Reduce<br><input type="radio"/> Probablemente se reduce la equidad<br><input type="radio"/> Probablemente no impacta la equidad<br><input type="radio"/> Probablemente incrementa<br><input type="radio"/> Incrementa<br><input type="radio"/> Varían<br><input checked="" type="radio"/> No se sabe | No se encontró evidencia                                                                                                                                                                                                                                                                                                                                                                                                                                                                                                                                                   |                                    |
| <b>Aceptabilidad</b><br>¿Es la opción aceptada por los diferentes actores involucrados en su implementación?                                                                                                                                                                                                               |                                                                                                                                                                                                                                                                                                                                                                                                                                                                                                                                                                            |                                    |
| <b>JUICIO</b>                                                                                                                                                                                                                                                                                                              | <b>EVIDENCIA DE LA INVESTIGACION</b>                                                                                                                                                                                                                                                                                                                                                                                                                                                                                                                                       | <b>CONSIDERACIONES ADICIONALES</b> |
| <input type="radio"/> No<br><input type="radio"/> Probablemente no<br><input type="radio"/> Probablemente si<br><input type="radio"/> Si<br><input type="radio"/> Varían<br><input checked="" type="radio"/> No se sabe                                                                                                    | No se encontró evidencia                                                                                                                                                                                                                                                                                                                                                                                                                                                                                                                                                   |                                    |
| <b>Factibilidad</b><br>¿Es la opción factible de IMPLEMENTAR?                                                                                                                                                                                                                                                              |                                                                                                                                                                                                                                                                                                                                                                                                                                                                                                                                                                            |                                    |
| <b>JUICIO</b>                                                                                                                                                                                                                                                                                                              | <b>EVIDENCIA DE LA INVESTIGACION</b>                                                                                                                                                                                                                                                                                                                                                                                                                                                                                                                                       | <b>CONSIDERACIONES ADICIONALES</b> |

|                                                                                    |                          |  |
|------------------------------------------------------------------------------------|--------------------------|--|
| No<br>○ Probablemente no<br>○ Probablemente si<br>○ Si<br>○ Varían<br>○ No se sabe | No se encontró evidencia |  |
|------------------------------------------------------------------------------------|--------------------------|--|

RESUMEN DE JUICIOS

|                         | JUICIOS                                       |                                                               |                                                                       |                                                  |                               |       |                     |
|-------------------------|-----------------------------------------------|---------------------------------------------------------------|-----------------------------------------------------------------------|--------------------------------------------------|-------------------------------|-------|---------------------|
| PROBLEMA                | No                                            | Probablemente no                                              | Probablemente si                                                      | Si                                               |                               | Varia | No se sabe          |
| EFFECTOS DESEABLES      | Trivial                                       | Pequeño                                                       | Moderado                                                              | Grande                                           |                               | Varia | No se sabe          |
| EFFECTOS INDESEABLES    | Grande                                        | Moderado                                                      | Pequeño                                                               | Trivial                                          |                               | Varia | No se sabe          |
| CERTEZA EN LA EVIDENCIA | Muy Bajo                                      | Bajo                                                          | Moderado                                                              | Alto                                             |                               |       | No incluyó estudios |
| VALORES DE PACIENTES    | Importante<br>incertidumbre o<br>variabilidad | Posiblemente<br>importante<br>incertidumbre o<br>variabilidad | Probablemente no<br>hay importante<br>incertidumbre o<br>variabilidad | No importante<br>incertidumbre o<br>variabilidad |                               |       |                     |
| BALANCE DE LOS EFECTOS  | Favorece al<br>comparador                     | Probablemente<br>Favorece al<br>comparador                    | No favorece ni a la<br>intervención ni al<br>comparador               | Probablemente<br>favorece a la<br>intervención   | Favorece a la<br>intervención | Varia | No se sabe          |
| RECURSOS REQUERIDOS     | Grandes costos                                | Moderados costos                                              | Costos y ahorros<br>insignificantes                                   | Moderados ahorros                                | Grandes ahorros               | Varia | No se sabe          |
| EQUIDAD                 | Reducida                                      | Probablemente<br>reducida                                     | Probablemente no<br>impactada                                         | Probablemente<br>incrementada                    | Incrementada                  | Varia | No se sabe          |
| ACEPTABILIDAD           | No                                            | Probablemente no                                              | Probablemente si                                                      | Si                                               |                               | Varia | No se sabe          |
| FACTIBILIDAD            | No                                            | Probablemente no                                              | Probablemente si                                                      | Si                                               |                               | Varia | No se sabe          |

## Tipo de recomendación

|                                                  |                                                       |                                                                                |                                                     |                                                |
|--------------------------------------------------|-------------------------------------------------------|--------------------------------------------------------------------------------|-----------------------------------------------------|------------------------------------------------|
| Recomendación fuerte en contra de la opción<br>○ | Recomendación condicional en contra de la opción<br>○ | Recomendación condicional a favor de cualquiera la opción o su comparador<br>○ | Recomendación condicional a favor de la opción<br>○ | Recomendación fuerte a favor de la opción<br>○ |
|--------------------------------------------------|-------------------------------------------------------|--------------------------------------------------------------------------------|-----------------------------------------------------|------------------------------------------------|

## Conclusiones

### Recomendación

En pacientes con espondiloartritis axial se recomienda el uso de antiinflamatorios no esteroideos (AINES) como primera opción de tratamiento.

*Recomendación fuerte a favor de la intervención. Certeza en la evidencia alta*

### Punto de buena Práctica

Al momento de prescribir medicamentos tipo AINES se deben valorar las posibles contraindicaciones.

El panel considera que, en caso de enfermedad activa, se deben usar dos AINES secuenciales en dosis óptimas por al menos 4 semanas.

### Justificación

Existe suficiente evidencia de buena calidad para recomendar esta intervención teniendo en cuenta los beneficios en control de dolor y control de la actividad de la enfermedad con un perfil de seguridad aceptable, lo cual hace que se realice una recomendación a favor de la intervención.

### Consideraciones por subgrupos



No se identifican como necesarias.

### Consideraciones de implementación

Se requiere una guía de atención que establezca el enfoque de los pacientes y el tratamiento necesario según el estadio de la enfermedad y la respuesta al tratamiento.

### Monitoreo y evaluación de cumplimiento

Se requiere realizar seguimiento de los pacientes en la consulta verificando mejoría en desenlaces como dolor y un adecuado control de la enfermedad evaluado por medio de clinimetría.

### Prioridades de investigación futura

Ninguna

TABLAS GRADE

Efectos deseables (beneficios de la opción a recomendar)

AINES tradicionales comparado con placebo para espondiloartritis axiales

| Desenlaces                                                                                | Nº de participantes (estudios)<br>Seguimiento | Certeza de la<br>evidencia<br>(GRADE) | Efecto<br>Relativo<br>(95% IC) | Efectos absolutos anticipados* (95% IC)                   |                                                                          |
|-------------------------------------------------------------------------------------------|-----------------------------------------------|---------------------------------------|--------------------------------|-----------------------------------------------------------|--------------------------------------------------------------------------|
|                                                                                           |                                               |                                       |                                | Riesgo con el placebo                                     | Diferencia de Riesgos con AINES                                          |
| Dolor con EVA<br>Escala de 0 a 100 mm (más alto es<br>peor)<br>seguimiento: 2 a 6 semanas | 859<br>(4 ECAs) <sup>1,2</sup>                | ⊕⊕⊕⊕<br>ALTA                          |                                | puntuación promedio de<br>dolor<br>61 puntos <sup>1</sup> | puntuación promedio de dolor<br>16.5 puntos menos (12,2 a 20,8<br>menos) |
| BASDAI<br>Escala de 0 a 100 (más alto es peor)                                            | 190<br>(1 estudio)                            | ⊕⊕⊕○<br>MODERADA                      | -                              | El promedio de BASDAI fue<br>54,7 puntos                  | El promedio de BASDAI fue<br>17,5 puntos menor                           |
| BASFI<br>Escala de 0 a 100 (más alto es peor)<br>Seguimiento a 6 semanas                  | 356<br>(2 estudios)                           | ⊕⊕⊕⊕<br>ALTA                          | -                              | El promedio de BASFI fue<br>50 puntos                     | El promedio de BASFI fue<br>9,1 puntos (5,1 a 13 menor)                  |

Kroon FP, van der Burg LR, Ramiro S, Landewe RB, Buchbinder R, Falzon L, et al. Non-steroidal anti-inflammatory drugs (NSAIDs) for axial spondyloarthritis (ankylosing spondylitis and non-radiographic axial spondyloarthritis). Cochrane Database Syst Rev. 2015(7):CD010952.

Efectos Indeseables

Comparación de AINES tradicionales comparado con placebo para espondiloartritis axial

| Desenlaces                                                              | Nº de participantes (estudios)<br>Seguimiento | Certeza de la<br>evidencia<br>(GRADE) | Efecto Relativo<br>(95% IC) | Efectos absolutos anticipados* (95% IC) |                                    |
|-------------------------------------------------------------------------|-----------------------------------------------|---------------------------------------|-----------------------------|-----------------------------------------|------------------------------------|
|                                                                         |                                               |                                       |                             | Riesgo con el<br>placebo                | Diferencia de Riesgos con<br>AINEs |
| suspensiones por eventos<br>adversos<br><br>seguimiento: 2 a 12 semanas | 1165 <sup>[1][2]</sup><br>(5 estudios)        | ⊕⊕⊕⊕<br>ALTA                          | RR 0,75 (0.46 a<br>1.21)    | 52 por 1000                             | 39 por 1,000<br>(24 a 63)          |
| Número de eventos adversos<br>serios<br><br>Seguimiento: 6 a 12 semanas | 671<br>(3 estudios)                           | ⊕⊕⊕○<br>MODERADA                      | RR 1,69 (0,36 a<br>7,97)    | 2 por 1000                              | 3 por 1000<br>(1 a 16)             |

Kroon FP, van der Burg LR, Ramiro S, Landewe RB, Buchbinder R, Falzon L, et al. Non-steroidal anti-inflammatory drugs (NSAIDs) for axial spondyloarthritis (ankylosing spondylitis and non-radiographic axial spondyloarthritis). Cochrane Database Syst Rev. 2015(7):CD010952.

## Referencias

1. van der Heijde D, Ramiro S, Landewe R, Baraliakos X, Van den Bosch F, Sepriano A, et al. 2016 update of the ASAS-EULAR management recommendations for axial spondyloarthritis. *Ann Rheum Dis*. 2017;76(6):978-91.
2. Ward MM, Deodhar A, Gensler LS, Dubreuil M, Yu D, Khan MA, et al. 2019 Update of the American College of Rheumatology/Spondylitis Association of America/Spondyloarthritis Research and Treatment Network Recommendations for the Treatment of Ankylosing Spondylitis and Nonradiographic Axial Spondyloarthritis. *Arthritis Rheumatol*. 2019;71(10):1599-613.
3. Kroon F, Landewe R, Dougados M, van der Heijde D. Continuous NSAID use reverts the effects of inflammation on radiographic progression in patients with ankylosing spondylitis. *Ann Rheum Dis*. 2012;71(10):1623-9.
4. Wanders A, Heijde D, Landewe R, Behier JM, Calin A, Olivieri I, et al. Nonsteroidal antiinflammatory drugs reduce radiographic progression in patients with ankylosing spondylitis: a randomized clinical trial. *Arthritis Rheum*. 2005;52(6):1756-65.
5. Poddubnyy D, Rudwaleit M, Haibel H, Listing J, Marker-Hermann E, Zeidler H, et al. Effect of non-steroidal anti-inflammatory drugs on radiographic spinal progression in patients with axial spondyloarthritis: results from the German Spondyloarthritis Inception Cohort. *Ann Rheum Dis*. 2012;71(10):1616-22.
6. Kroon FP, van der Burg LR, Ramiro S, Landewe RB, Buchbinder R, Falzon L, et al. Non-steroidal anti-inflammatory drugs (NSAIDs) for axial spondyloarthritis (ankylosing spondylitis and non-radiographic axial spondyloarthritis). *Cochrane Database Syst Rev*. 2015(7):CD010952.
7. NICE. Spondyloarthritis in over 16s: diagnosis and management 2017.
8. Jansen JP, Pellissier J, Choy EH, Ostor A, Nash JT, Bacon P, et al. Economic evaluation of etoricoxib versus non-selective NSAIDs in the treatment of ankylosing spondylitis in the UK. *Current Medical Research and Opinion*. 2007;23(12):3069-78.
9. Jansen JP, Gaugris S, Choy EH, Ostor A, Nash JT, Stam W. Cost effectiveness of etoricoxib versus celecoxib and non-selective NSAIDS in the treatment of ankylosing spondylitis. *Pharmacoeconomics*. 2010;28(4):323-44.
10. Fan M, Liu J, Zhao B, Wu X, Li X, Gu J. Indirect comparison of NSAIDs for ankylosing spondylitis: Network meta-analysis of randomized, double-blinded, controlled trials. *Exp Ther Med*. 2020;19(4):3031-3041. doi:10.3892/etm.2020.8564

## Pregunta 4:

¿Se debe dar DMARDs convencionales en pacientes con Espondiloartritis Axial y manifestaciones axiales?

|                     |                                                                                                                                                                                                      |
|---------------------|------------------------------------------------------------------------------------------------------------------------------------------------------------------------------------------------------|
| <b>Población</b>    | Pacientes adultos con Espondiloartritis Axial y manifestaciones axiales                                                                                                                              |
| <b>Intervención</b> | Drogas antirreumáticas modificadoras de la enfermedad: metotrexate, leflunomida, sulfasalazina, antimaláricos, ciclosporina                                                                          |
| <b>Comparación</b>  | No usar DMARDs                                                                                                                                                                                       |
| <b>Desenlaces</b>   | Efectividad (control enfermedad, remisión/baja actividad de síntomas, mejoría de escalas de funcionalidad)<br><br>calidad de vida<br><br>progresión radiográfica<br><br>Seguridad (eventos adversos) |

## Antecedentes

En el tratamiento de pacientes con espondiloartritis axial refractarios o intolerantes a los AINEs, se han postulado los DMARDs (de sus siglas en inglés como Fármacos Antirreumáticos Modificadores de la Enfermedad). Entre ellos están las sales de oro, fármacos antimaláricos, metotrexate, D-penicilamina, sulfasalazina y otros tratamientos inmunosupresores. Sin embargo, los beneficios de los DMARDs en el tratamiento de la espondiloartritis axial aún no son claros (Cheng 2005) (1). Hay quienes sustentan que los DMARD solo deben ser usados en personas con EspAax cuando hay afectación articular periférica, pero que su utilidad en casos de síntomas axiales (ej. columna vertebral) es limitada.

A pesar de esto, se ha propuesto su uso en pacientes que no pueden ser tratados con inhibidores del factor de necrosis tumoral (iTNF) o en pacientes que desistan de este tipo de tratamiento con iTNF. La sulfasalazina, por ejemplo, es uno de los DMARDs que ha sido postulado para este fin ya que en algunos estudios ha mostrado beneficio en la respuesta clínica y de imágenes de pacientes con síntomas axiales (Cheng 2005) (1). El uso de otros DMARDs como el metotrexate, al parecer no muestra beneficio en el tratamiento de la EPA con manifestaciones axiales (Cheng 2013) (2).

## Evidencia

Se realizó una búsqueda amplia y completa de la literatura publicada hasta febrero de 2020 siguiendo una estrategia de búsqueda y procesos de selección predefinidos (anexo 1). En la búsqueda no se identificaron estudios que evaluaran comparativamente DMARDs convencionales agrupados vs otras

terapias en el tratamiento de la EA. Este resumen se basa en un total de dos revisiones sistemáticas de la literatura (Cheng 2013 y Cheng 2014) (2,3), las cuales evalúan efectividad y seguridad del metotrexate y la sulfasalazina en la espondilitis anquilosante. La calidad global de la evidencia fue calificada como “Baja” de acuerdo con la aproximación GRADE.

La revisión sistemática de Cheng publicada en el año 2013 (2) tuvo como objeto evaluar la efectividad y seguridad del metotrexate en la espondilitis anquilosante, incluyó 3 estudios de los cuales dos compararon metotrexate vs placebo y uno que comparó metotrexate más naproxeno vs naproxeno sólo; en los tres estudios se incluyó un total de 116 pacientes con espondilitis anquilosante. Los desenlaces evaluados en esta revisión fueron funcionalidad física, dolor, movilidad espinal, dolor articular periférico/entesitis, cambios en la radiografía de columna vertebral, evaluación global de la enfermedad, edema y sensibilidad articular.

La revisión sistemática de Cheng publicada en el año 2014 (3) tuvo como objeto evaluar la efectividad y seguridad de la sulfasalazina en la espondilitis anquilosante, incluyó 11 estudios que compararon sulfasalazina vs placebo con un total de 895 pacientes con espondilitis anquilosante. Los desenlaces evaluados en esta revisión fueron dolor (escala visual análoga o escala de clasificación numérica), índice de actividad de la enfermedad de espondilitis anquilosante de Bath (BASDAI), índice de función de espondilitis anquilosante de Bath (BASFI), índice de metrología de la espondilitis anquilosante de Bath (BASMI), progresión radiográfica, número total de retiros debido a eventos adversos y eventos adversos graves.

El estudio de J C van Denderen conducido en Amsterdam en el año 2005 (JC van Denderen 2005) (4) tuvo el objetivo de evaluar el efecto de la leflunomida vs placebo con una tasa de respuesta del 20% según la evaluación en espondilitis anquilosante (ASAS). Incluyó 45 pacientes, que cumplieron con los criterios de selección como ser mayores de 18 años y tener espondilitis anquilosante de acuerdo con los criterios de Nueva York modificados con actividad de la enfermedad definida por tener al menos 4 puntos en el índice de BASDAI y un puntaje de mínimo 4 en la escala visual análoga de dolor en el momento del tamizaje. Los pacientes fueron asignados aleatoriamente a recibir leflunomida 20 mg día con dosis de carga previa o placebo. Ni los pacientes, los clínicos y los analistas de datos conocían el tratamiento asignado que recibían los pacientes. Todos los pacientes fueron evaluados en la semana 24 o posteriormente según el tiempo disponible en tratamiento.

### **Control enfermedad, remisión/baja actividad de síntomas/mejoría de escalas de funcionalidad**

Entre los estudios que evaluaron metotrexate, sólo un estudio (González-López 2004) (5) reportó un beneficio absoluto de 36% en el grupo de metotrexate comparado con placebo (RR 3,18; IC 95% % [1,03 a 9,79]; NNT de 3) en la tasa de respuesta basada en un índice compuesto que incluyó rigidez matutina, bienestar físico, índice de actividad de la enfermedad de espondilitis anquilosante de Bath (BASDAI), índice funcional de espondilitis anquilosante de Bath (BASFI), cuestionario de evaluación de salud para espondiloartropatías (HAQ-S) y evaluación global de médicos y pacientes. La calidad de la evidencia baja debido a imprecisión de los resultados.

Los estudios que evaluaron Sulfasalazina (SLZ), (Clegg 1996; Dougados 1986; Nissila 1988; Schmidt 2002; Taylor 1991; Winkler 1989) (6–11), reportaron sobre el efecto en el control del dolor. La

diferencia de medias agrupadas para lumbalgia medida con escala visual análoga de 0 a 100mm fue (DM -2.96 IC 95% [-6,33 a 0,41]); con una diferencia de riesgo absoluto de 3%, IC 95% [1% a 6%]; 6 estudios. La calidad de la evidencia fue moderada por la consistencia de los resultados.

El estudio que evaluó leflunomida (J C Vanderderen 2005) (4) no mostró diferencias en la respuesta al tratamiento según la definición ASAS20% (RR 1,33; IC 95% [0,01 a 140,2]). La calidad de esta evidencia es baja debido a imprecisión de las estimaciones y riesgo de sesgo (no hay claridad en la evaluación ciega del desenlace).

## Calidad de vida

Los estudios identificados no reportaron sobre este desenlace

## Progresión radiográfica

Los estudios incluidos no reportaron sobre los hallazgos radiográficos. Ninguno de los estudios incluidos evaluó BASDAI, BASFI, BASMI o progresión radiográfica.

## Seguridad (eventos adversos)

Los estudios que evaluaron sulfasalazina (SLZ) (Clegg 1996; Corkill 1990; Davis 1989; Dougados 1986; Feltelius 1986; Kir- wan 1993; Krajnc 1990; Nissila 1988; Schmidt 2002; Taylor 1991; Winkler 1989 ) (6–16) , mostraron un aumento del riesgo de eventos adversos en el grupo de pacientes que recibieron sulfasalazina en comparación con los que recibieron placebo (RR 1,50 IC [95% 1,04 a 2,15]; RAR 4% IC 95% [0,4% a 8,8%]; 11 estudios). La calidad de la evidencia fue moderada por imprecisión en los resultados.

El estudio que evaluó leflunomida no encontró diferencias en la presentación de eventos adversos entre los dos grupos (RR 1,2 IC [95% 0,67 a 2,16], los eventos adversos más frecuentes fueron trastornos gastrointestinales y dermatológicos. No se presentaron eventos adversos severos. La calidad de la evidencia fue baja por imprecisión en los resultados y no claridad en el cegamiento.

## Preferencia de pacientes

Se encontró una revisión sistemática (RS) de estudios cualitativos (Kelly 2018) (17) que evaluó las actitudes y experiencias de los pacientes con artritis y espondiloartritis frente al uso de DMARDs. La revisión incluyó 56 estudios cualitativos, que aportaron 1.383 pacientes; 14% con diagnóstico de espondiloartritis y 5% tratados DMARDs convencionales. Los estudios usaron diferentes metodologías, como entrevistas, grupos focales o la mezcla de los dos. En la RS se evaluaron seis aspectos: la identidad de la enfermedad, las incertidumbres estresantes y sus consecuencias, la influencia social, el privilegio y correcto acceso a los agentes biológicos, el mantener el control de los síntomas y el negociar las expectativas del tratamiento. Entre los resultados de esta RS estudio se destacan:

Los pacientes perciben los DMARD como medicamentos fuertes con efectos secundarios alarmantes que intensifican la severidad de su enfermedad.

Los pacientes refirieron que decidían no iniciar los medicamentos porque: a) esto significaba que estaban gravemente enfermos, b) tenían temor a los efectos secundarios de su primer medicamento,

c) olvidan tomar los medicamentos porque se sentían bien, lo cual se presenta como una señal de mejora.

El presentar una recaída por falta de adherencia al tratamiento, fue interpretado como una dependencia indefinida a los medicamentos, lo cual les genera angustia por los potenciales efectos secundarios.

La confianza en la atención médica, el conocer las experiencias positivas de otros pacientes que toman DMARDs y la expectativa de que los medicamentos le ayudarán a mantener la participación en la vida, fueron los aspectos que se identificaron motivan a los pacientes a usar DMARD.

Los autores concluyen que crear un ambiente de apoyo para que los pacientes expresen sus preocupaciones puede mejorar la satisfacción del tratamiento, el cumplimiento y los resultados de salud.

## Recursos requeridos

No se encontró evidencia



## DE LA EVIDENCIA A LAS DECISIONES

|                        |                                                                                                                                                                                                                                             |
|------------------------|---------------------------------------------------------------------------------------------------------------------------------------------------------------------------------------------------------------------------------------------|
| PREGUNTA               |                                                                                                                                                                                                                                             |
| POBLACION              | Pacientes adultos con Espondiloartritis Axial y manifestaciones axiales                                                                                                                                                                     |
| INTERVENCIÓN           | DMARDs convencionales (Drogas antirreumáticas modificadoras de la enfermedad -metotrexate, leflunomida, sulfasalazina, antimaláricos, ciclosporina)                                                                                         |
| COMPARACIÓN            | Placebo                                                                                                                                                                                                                                     |
| DESENLACES PRINCIPALES | <p>Efectividad:</p> <p>control de la enfermedad</p> <p>remisión/baja actividad de síntoma</p> <p>mejoría en escalas de funcionalidad y calidad de vida</p> <p>Mejoría progresión radiográfica</p> <p>Seguridad:</p> <p>eventos adversos</p> |
| ÁMBITO                 | Ambulatorio-consulta especialista                                                                                                                                                                                                           |
| PERSPECTIVA            | Del grupo desarrollador de la Guía                                                                                                                                                                                                          |
| CONFLICTO DE INTERÉS:  | No hay declaración de ningún conflicto de interés                                                                                                                                                                                           |

## EVALUACIÓN

| Problema                                                                                                                                                             |                                                                                                                                                                                                                                                                                                                                                                                                                                                                                                                                                                                                                          |                                 |                          |                                         |                                |                                            |                                 |                          |                                         |  |                    |                                |                                                          |                |                        |  |                 |                               |  |  |
|----------------------------------------------------------------------------------------------------------------------------------------------------------------------|--------------------------------------------------------------------------------------------------------------------------------------------------------------------------------------------------------------------------------------------------------------------------------------------------------------------------------------------------------------------------------------------------------------------------------------------------------------------------------------------------------------------------------------------------------------------------------------------------------------------------|---------------------------------|--------------------------|-----------------------------------------|--------------------------------|--------------------------------------------|---------------------------------|--------------------------|-----------------------------------------|--|--------------------|--------------------------------|----------------------------------------------------------|----------------|------------------------|--|-----------------|-------------------------------|--|--|
| ¿Es el problema una prioridad?                                                                                                                                       |                                                                                                                                                                                                                                                                                                                                                                                                                                                                                                                                                                                                                          |                                 |                          |                                         |                                |                                            |                                 |                          |                                         |  |                    |                                |                                                          |                |                        |  |                 |                               |  |  |
| JUICIO                                                                                                                                                               | EVIDENCIA DE LA INVESTIGACION                                                                                                                                                                                                                                                                                                                                                                                                                                                                                                                                                                                            |                                 |                          |                                         | CONSIDERACIONES ADICIONALES    |                                            |                                 |                          |                                         |  |                    |                                |                                                          |                |                        |  |                 |                               |  |  |
| <ul style="list-style-type: none"><li>○ No</li><li>○ Probablemente No</li><li>○ Probablemente Si</li><li>○ Si</li><li>○ Es variable</li><li>○ No se conoce</li></ul> | En el tratamiento de pacientes con espondiloartritis axial refractarios o intolerantes a los AINEs, se han postulado los DMARDs (de sus siglas en inglés como Fármacos Antirreumáticos Modificadores de la Enfermedad). Sin embargo, los beneficios de los DMARDs en el tratamiento de la espondiloartritis axial aún no son claros (Cheng 2005). Hay quienes sustentan que los DMARD solo deben ser usados en personas con EPA axial cuando hay afectación periférica (síntomas en las caderas, rodillas, tobillos), pero que su utilidad en casos de síntomas axiales (ej. columna vertebral y el cuello) es limitada. |                                 |                          |                                         |                                |                                            |                                 |                          |                                         |  |                    |                                |                                                          |                |                        |  |                 |                               |  |  |
| Efectos deseables (beneficios de la opción a recomendar)                                                                                                             |                                                                                                                                                                                                                                                                                                                                                                                                                                                                                                                                                                                                                          |                                 |                          |                                         |                                |                                            |                                 |                          |                                         |  |                    |                                |                                                          |                |                        |  |                 |                               |  |  |
| ¿Qué tan sustanciales son los efectos deseables de la opción?                                                                                                        |                                                                                                                                                                                                                                                                                                                                                                                                                                                                                                                                                                                                                          |                                 |                          |                                         |                                |                                            |                                 |                          |                                         |  |                    |                                |                                                          |                |                        |  |                 |                               |  |  |
| JUICIO                                                                                                                                                               | EVIDENCIA DE LA INVESTIGACION                                                                                                                                                                                                                                                                                                                                                                                                                                                                                                                                                                                            |                                 |                          |                                         | CONSIDERACIONES ADICIONALES    |                                            |                                 |                          |                                         |  |                    |                                |                                                          |                |                        |  |                 |                               |  |  |
| <ul style="list-style-type: none"><li>○ Triviales</li><li>○ Pequeños</li><li>○ Moderados</li><li>○ Grandes</li><li>○ Varían</li><li>○ No se sabe</li></ul>           | <table><tr><th rowspan="2">Desenlaces</th><th rowspan="2">Nº de participantes (estudios) Seguimiento</th><th rowspan="2">Certeza de la evidencia (GRADE)</th><th rowspan="2">Efecto relativo (95% IC)</th><th colspan="2">Efectos absolutos anticipados* (95% CI)</th></tr><tr><th>Riesgo con placebo</th><th>Diferencias de riesgos con MTX</th></tr><tr><td>BASFI (puntaje de 0 a 10, 0=excelente, 10= mala función)</td><td>35 (1 estudio)</td><td>⊕⊕○○ Bajo<sup>1</sup></td><td></td><td>Cambio promedio</td><td>Cambio promedio Puntaje BASFI</td></tr></table>                                                     |                                 |                          |                                         | Desenlaces                     | Nº de participantes (estudios) Seguimiento | Certeza de la evidencia (GRADE) | Efecto relativo (95% IC) | Efectos absolutos anticipados* (95% CI) |  | Riesgo con placebo | Diferencias de riesgos con MTX | BASFI (puntaje de 0 a 10, 0=excelente, 10= mala función) | 35 (1 estudio) | ⊕⊕○○ Bajo <sup>1</sup> |  | Cambio promedio | Cambio promedio Puntaje BASFI |  |  |
| Desenlaces                                                                                                                                                           | Nº de participantes (estudios) Seguimiento                                                                                                                                                                                                                                                                                                                                                                                                                                                                                                                                                                               | Certeza de la evidencia (GRADE) | Efecto relativo (95% IC) | Efectos absolutos anticipados* (95% CI) |                                |                                            |                                 |                          |                                         |  |                    |                                |                                                          |                |                        |  |                 |                               |  |  |
|                                                                                                                                                                      |                                                                                                                                                                                                                                                                                                                                                                                                                                                                                                                                                                                                                          |                                 |                          | Riesgo con placebo                      | Diferencias de riesgos con MTX |                                            |                                 |                          |                                         |  |                    |                                |                                                          |                |                        |  |                 |                               |  |  |
| BASFI (puntaje de 0 a 10, 0=excelente, 10= mala función)                                                                                                             | 35 (1 estudio)                                                                                                                                                                                                                                                                                                                                                                                                                                                                                                                                                                                                           | ⊕⊕○○ Bajo <sup>1</sup>          |                          | Cambio promedio                         | Cambio promedio Puntaje BASFI  |                                            |                                 |                          |                                         |  |                    |                                |                                                          |                |                        |  |                 |                               |  |  |

|                                                                                                                                                                                                                                                                                                                             |                                                  |                                    |                                |                                            |                                                                                 |                                                  |
|-----------------------------------------------------------------------------------------------------------------------------------------------------------------------------------------------------------------------------------------------------------------------------------------------------------------------------|--------------------------------------------------|------------------------------------|--------------------------------|--------------------------------------------|---------------------------------------------------------------------------------|--------------------------------------------------|
| seguimiento: 24 semanas                                                                                                                                                                                                                                                                                                     |                                                  |                                    |                                |                                            | Puntaje<br>BASFI 0,4                                                            | 0.9 menor<br><br>(0,43 menor a 2,23<br>más alto) |
| Diferencia absoluta del riesgo 3% menor (IC 95% 1% A 6%); porcentaje de cambio relativo =6%(IC 95%: 2%a 12%)                                                                                                                                                                                                                |                                                  |                                    |                                |                                            |                                                                                 |                                                  |
| Desenlaces                                                                                                                                                                                                                                                                                                                  | Nº de participantes<br>(estudios)<br>Seguimiento | Certeza de la<br>evidencia (GRADE) | Efecto<br>relativo<br>(95% IC) | Efectos absolutos anticipados* (95%<br>CI) |                                                                                 |                                                  |
|                                                                                                                                                                                                                                                                                                                             |                                                  |                                    |                                | Riesgo con<br>placebo                      | Diferencias de<br>riesgos con SLZ                                               |                                                  |
|                                                                                                                                                                                                                                                                                                                             |                                                  |                                    |                                |                                            |                                                                                 |                                                  |
| Lumbalgia <sup>a</sup><br><br>(datos agrupados)<br><br>EVA 0 a 100mm<br><br>seguimiento: 26<br>semanas                                                                                                                                                                                                                      | 454 (6 estudios)                                 | ⊕⊕⊕○<br><br>Moderado <sup>2</sup>  |                                | Promedio<br><br>Puntaje<br><br>49,5mm      | promedio<br><br>Puntaje<br><br>0.9 menor<br><br>(0,43 menor a 2,23<br>más alto) |                                                  |
| Chen, J., Veras, M. M. S., Liu, C., & Lin, J. (2013, February 28). Methotrexate for ankylosing spondylitis. Cochrane Database of Systematic Reviews. John Wiley and Sons Ltd. <a href="https://doi.org/10.1002/14651858.CD004524.pub4">https://doi.org/10.1002/14651858.CD004524.pub4</a> (2)                               |                                                  |                                    |                                |                                            |                                                                                 |                                                  |
| Chen, J., & Liu, C. (2014). Sulfasalazine for ankylosing spondylitis. [Review] [42 refs]. Cochrane Database Syst Rev, (2), CD004800. <a href="https://doi.org/10.1002/14651858.CD004800.pub3">https://doi.org/10.1002/14651858.CD004800.pub3</a> . <a href="http://www.cochranelibrary.com">www.cochranelibrary.com</a> (3) |                                                  |                                    |                                |                                            |                                                                                 |                                                  |
| Efectos Indeseables                                                                                                                                                                                                                                                                                                         |                                                  |                                    |                                |                                            |                                                                                 |                                                  |
| ¿Qué tan sustanciales son los efectos indeseables que se pueden anticipar?                                                                                                                                                                                                                                                  |                                                  |                                    |                                |                                            |                                                                                 |                                                  |
| JUICIO                                                                                                                                                                                                                                                                                                                      | EVIDENCIA DE LA INVESTIGACION                    |                                    |                                |                                            |                                                                                 | CONSIDERACIONES<br>ADICIONALES                   |

- Triviales
- Pequeños
- Moderados
- Grandes
- Varían
- No se sabe

| Desenlaces                                                          | Nº de participantes (estudios) Seguimiento | Certeza de la evidencia (GRADE) | Efecto relativo (95% IC)      | Efectos absolutos anticipados* (95% CI) |                           |
|---------------------------------------------------------------------|--------------------------------------------|---------------------------------|-------------------------------|-----------------------------------------|---------------------------|
|                                                                     |                                            |                                 |                               | Riesgo con no MTX                       | Diferencia de riesgos MTX |
| Suspensión por algún efecto adverso.<br><br>Seguimiento: 24 semanas | 35 (1ECAs)                                 | ⊕⊕○○<br><br>Bajo                | RR 1.06<br><br>(0.07 a 15.62) | 56 por 1.000                            | 59 por 1.000 (4 a 868)    |

| Desenlaces                                                          | Nº de participantes (estudios) Seguimiento | Certeza de la evidencia (GRADE) | Efecto relativo (95% IC)      | Efectos absolutos anticipados* (95% CI) |                           |
|---------------------------------------------------------------------|--------------------------------------------|---------------------------------|-------------------------------|-----------------------------------------|---------------------------|
|                                                                     |                                            |                                 |                               | Riesgo con placebo                      | Diferencia de riesgos SLZ |
| Eventos adversos serios<br><br>Seguimiento: 26 semanas              | 264 (1 estudio)                            | ⊕⊕⊕○<br><br>Moderada            | OR 7,5<br><br>(0,15 a 378,16) | 0 por 1.000                             | 1 por 1.000               |
| Suspensión por algún efecto adverso.<br><br>Seguimiento: 26 semanas | 895 (11ECAs)                               | ⊕⊕⊕○<br><br>Moderada            | RR 1,43<br><br>(1,04 a 1,94)  | 94 por 1.000                            | 134 por 1.000 (98 a 182)  |

Chen, J., Veras, M. M. S., Liu, C., & Lin, J. (2013, February 28). Methotrexate for ankylosing spondylitis. Cochrane Database of Systematic Reviews. John Wiley and Sons Ltd. <https://doi.org/10.1002/14651858.CD004524.pub4> (2)

Chen, J., & Liu, C. (2014). Sulfasalazine for ankylosing spondylitis. [Review] [42 refs]. Cochrane Database Syst Rev, (2), CD004800. <https://doi.org/10.1002/14651858.CD004800.pub3>. [www.cochranelibrary.com](http://www.cochranelibrary.com) (3)

| Certeza en la Evidencia                                                                                                                                                                                                                                                                                 |                                                                                                                                                                                                                                                                                                                                                                                                                                                                                                                                                                                                                                                                                          |                                 |                      |                                 |                  |         |              |                                                                                                |         |              |                                                                         |
|---------------------------------------------------------------------------------------------------------------------------------------------------------------------------------------------------------------------------------------------------------------------------------------------------------|------------------------------------------------------------------------------------------------------------------------------------------------------------------------------------------------------------------------------------------------------------------------------------------------------------------------------------------------------------------------------------------------------------------------------------------------------------------------------------------------------------------------------------------------------------------------------------------------------------------------------------------------------------------------------------------|---------------------------------|----------------------|---------------------------------|------------------|---------|--------------|------------------------------------------------------------------------------------------------|---------|--------------|-------------------------------------------------------------------------|
| ¿Cuál es la certeza en la evidencia global sobre los efectos de la opción a recomendar?                                                                                                                                                                                                                 |                                                                                                                                                                                                                                                                                                                                                                                                                                                                                                                                                                                                                                                                                          |                                 |                      |                                 |                  |         |              |                                                                                                |         |              |                                                                         |
| JUICIO                                                                                                                                                                                                                                                                                                  | EVIDENCIA DE LA INVESTIGACION                                                                                                                                                                                                                                                                                                                                                                                                                                                                                                                                                                                                                                                            | CONSIDERACIONES ADICIONALES     |                      |                                 |                  |         |              |                                                                                                |         |              |                                                                         |
| <ul style="list-style-type: none"> <li>○ Muy baja</li> <li>○ <b>Baja</b></li> <li>○ Moderada</li> <li>○ Alta</li> <li>○ No se identificaron estudios</li> </ul>                                                                                                                                         | <table> <tr> <th>Desenlaces</th><th>Importancia Relativa</th><th>Certeza de la evidencia (GRADE)</th></tr> <tr> <td>Eventos adversos</td><td>CRITICA</td><td>⊕⊕○○<br/>Baja</td></tr> <tr> <td>control enfermedad, remisión/baja actividad de síntomas y mejoría de escalas de funcionalidad.</td><td>CRITICA</td><td>⊕⊕○○<br/>Baja</td></tr> </table>                                                                                                                                                                                                                                                                                                                                    | Desenlaces                      | Importancia Relativa | Certeza de la evidencia (GRADE) | Eventos adversos | CRITICA | ⊕⊕○○<br>Baja | control enfermedad, remisión/baja actividad de síntomas y mejoría de escalas de funcionalidad. | CRITICA | ⊕⊕○○<br>Baja | para calidad de vida y progresión radiográfica no se encontró evidencia |
| Desenlaces                                                                                                                                                                                                                                                                                              | Importancia Relativa                                                                                                                                                                                                                                                                                                                                                                                                                                                                                                                                                                                                                                                                     | Certeza de la evidencia (GRADE) |                      |                                 |                  |         |              |                                                                                                |         |              |                                                                         |
| Eventos adversos                                                                                                                                                                                                                                                                                        | CRITICA                                                                                                                                                                                                                                                                                                                                                                                                                                                                                                                                                                                                                                                                                  | ⊕⊕○○<br>Baja                    |                      |                                 |                  |         |              |                                                                                                |         |              |                                                                         |
| control enfermedad, remisión/baja actividad de síntomas y mejoría de escalas de funcionalidad.                                                                                                                                                                                                          | CRITICA                                                                                                                                                                                                                                                                                                                                                                                                                                                                                                                                                                                                                                                                                  | ⊕⊕○○<br>Baja                    |                      |                                 |                  |         |              |                                                                                                |         |              |                                                                         |
| Valores de los pacientes                                                                                                                                                                                                                                                                                |                                                                                                                                                                                                                                                                                                                                                                                                                                                                                                                                                                                                                                                                                          |                                 |                      |                                 |                  |         |              |                                                                                                |         |              |                                                                         |
| ¿Hay variación o poca certeza sobre cómo valoran las personas/los pacientes los desenlaces principales?                                                                                                                                                                                                 |                                                                                                                                                                                                                                                                                                                                                                                                                                                                                                                                                                                                                                                                                          |                                 |                      |                                 |                  |         |              |                                                                                                |         |              |                                                                         |
| JUICIO                                                                                                                                                                                                                                                                                                  | EVIDENCIA DE LA INVESTIGACION                                                                                                                                                                                                                                                                                                                                                                                                                                                                                                                                                                                                                                                            | CONSIDERACIONES ADICIONALES     |                      |                                 |                  |         |              |                                                                                                |         |              |                                                                         |
| <ul style="list-style-type: none"> <li>○ Variabilidad o incertidumbre importante</li> <li>○ <b>Posiblemente hay variabilidad o incertidumbre importante</b></li> <li>○ Posiblemente No hay variabilidad o incertidumbre importante</li> <li>○ No hay variabilidad o incertidumbre importante</li> </ul> | <p>Los pacientes perciben los DMARD como medicamentos fuertes con efectos secundarios alarmantes que intensifican la identidad de su enfermedad.</p> <p>Los pacientes refirieron que decidían no iniciar los medicamentos porque: a) esto significaba que estaban gravemente enfermos, b) tenían temor a los efectos secundarios de su primer medicamento, c) olvidan tomar los medicamentos porque se sentían bien, lo cual se presenta como una señal de mejora.</p> <p>El presentar una recaída por falta de adherencia al tratamiento, fue interpretado como una dependencia indefinida a los medicamentos, lo cual les genera angustia por los potenciales efectos secundarios.</p> |                                 |                      |                                 |                  |         |              |                                                                                                |         |              |                                                                         |

|                                                                                                                                                                                                                                                                                                                          |                                                                                                                                                                                                                                                                                                                                                                                                                                                                                                           |                             |
|--------------------------------------------------------------------------------------------------------------------------------------------------------------------------------------------------------------------------------------------------------------------------------------------------------------------------|-----------------------------------------------------------------------------------------------------------------------------------------------------------------------------------------------------------------------------------------------------------------------------------------------------------------------------------------------------------------------------------------------------------------------------------------------------------------------------------------------------------|-----------------------------|
|                                                                                                                                                                                                                                                                                                                          | <p>La confianza en la atención médica, el conocer las experiencias positivas de otros pacientes que toman DMARDs y la expectativa de que los medicamentos le ayudarán a mantener la participación en la vida, fueron los aspectos que se identificaron motivan a los pacientes a usar DMARD.</p> <p>Los autores concluyen que crear un ambiente de apoyo para que los pacientes expresen sus preocupaciones puede mejorar la satisfacción del tratamiento, el cumplimiento y los resultados de salud.</p> |                             |
| <b>Balance de los efectos</b><br>¿El balance entre los efectos deseables e indeseables favorece la opción o el comparador?                                                                                                                                                                                               |                                                                                                                                                                                                                                                                                                                                                                                                                                                                                                           |                             |
| JUICIO                                                                                                                                                                                                                                                                                                                   | EVIDENCIA DE LA INVESTIGACION                                                                                                                                                                                                                                                                                                                                                                                                                                                                             | CONSIDERACIONES ADICIONALES |
| <ul style="list-style-type: none"> <li>○ Favorece al comparador</li> <li>○ Probablemente favorece al comparador</li> <li>○ No favorece al comparador ni a la opción en evaluación</li> <li>○ Probablemente favorece a la opción</li> <li>○ Favorece a la intervención</li> <li>○ Varían</li> <li>○ No se sabe</li> </ul> | <p>Se considera que el balance entre los efectos deseables y no deseables no favorece el uso de la intervención teniendo en cuenta la poca evidencia que existe para el uso de DMARDs convencionales en espondiloartritis axial y la presencia de eventos adversos asociados al uso de este tratamiento.</p>                                                                                                                                                                                              |                             |
| <b>Recursos requeridos</b><br>Que tan grandes son los requerimientos de recursos (costos)?                                                                                                                                                                                                                               |                                                                                                                                                                                                                                                                                                                                                                                                                                                                                                           |                             |
| JUICIO                                                                                                                                                                                                                                                                                                                   | EVIDENCIA DE LA INVESTIGACION                                                                                                                                                                                                                                                                                                                                                                                                                                                                             | CONSIDERACIONES ADICIONALES |

|                                                                                                                                                                                                                                                          |                                                                      |                                    |
|----------------------------------------------------------------------------------------------------------------------------------------------------------------------------------------------------------------------------------------------------------|----------------------------------------------------------------------|------------------------------------|
| <ul style="list-style-type: none"> <li>○ Grandes costos</li> <li>○ Costos moderados</li> <li>○ no significantes costos ni ahorros</li> <li>○ Moderados ahorros</li> <li>○ Grandes ahorros</li> <li>○ Varían</li> <li>○ No se sabe</li> </ul>             | No se encontró estudios económicos que evaluaran esta opción.        |                                    |
| <b>Equidad</b><br>¿La implementación de la opción, tendrá impacto en la equidad?                                                                                                                                                                         |                                                                      |                                    |
| <b>JUICIO</b>                                                                                                                                                                                                                                            | <b>EVIDENCIA DE LA INVESTIGACION</b>                                 | <b>CONSIDERACIONES ADICIONALES</b> |
| <ul style="list-style-type: none"> <li>○ Reduce</li> <li>○ Probablemente se reduce la equidad</li> <li>○ Probablemente no impacta la equidad</li> <li>○ Probablemente incrementa</li> <li>○ Incrementa</li> <li>○ Varía</li> <li>○ No se sabe</li> </ul> | No se encontró evidencia que informe sobre el impacto en la equidad. |                                    |
| <b>Aceptabilidad</b><br>¿Es la opción aceptada por los diferentes actores involucrados en su implementación?                                                                                                                                             |                                                                      |                                    |
| <b>JUICIO</b>                                                                                                                                                                                                                                            | <b>EVIDENCIA DE LA INVESTIGACION</b>                                 | <b>CONSIDERACIONES ADICIONALES</b> |

|                                                                                                                                                                                                                                                                                                        |                                                                                             |                                    |
|--------------------------------------------------------------------------------------------------------------------------------------------------------------------------------------------------------------------------------------------------------------------------------------------------------|---------------------------------------------------------------------------------------------|------------------------------------|
| <ul style="list-style-type: none"> <li><input type="radio"/> No</li> <li><input type="radio"/> Probablemente no</li> <li><input type="radio"/> Probablemente si</li> <li><input type="radio"/> Si</li> <li><input type="radio"/> Varia</li> <li><input checked="" type="radio"/> No se sabe</li> </ul> | <p>No se encontró evidencia de la aceptabilidad de los diferentes actores involucrados.</p> |                                    |
| <div style="background-color: #2e75b6; color: white; padding: 10px;"> <h3>Factibilidad</h3> <p>¿Es la opción factible de IMPLEMENTAR?</p> </div>                                                                                                                                                       |                                                                                             |                                    |
| <p>JUICIO</p>                                                                                                                                                                                                                                                                                          | <p>EVIDENCIA DE LA INVESTIGACION</p>                                                        | <p>CONSIDERACIONES ADICIONALES</p> |
| <ul style="list-style-type: none"> <li>No</li> <li><input type="radio"/> Probablemente no</li> <li><input type="radio"/> Probablemente si</li> <li><input type="radio"/> Si</li> <li><input type="radio"/> Varia</li> <li><input checked="" type="radio"/> No se sabe</li> </ul>                       | <p>No se encontró evidencia</p>                                                             |                                    |



## Resumen de Juicios

|                         | JUICIOS                                 |                                                       |                                                          |                                            |                            |        |                        |
|-------------------------|-----------------------------------------|-------------------------------------------------------|----------------------------------------------------------|--------------------------------------------|----------------------------|--------|------------------------|
| PROBLEMA                | No                                      | Probablemente No                                      | Probablemente si                                         | Si                                         |                            | Varían | No se sabe             |
| EFFECTOS DESEABLES      | Triviales                               | Pequeños                                              | Moderados                                                | Grandes                                    |                            | Varían | No se sabe             |
| EFFECTOS INDESEABLES    | Grandes                                 | Moderados                                             | Pequeños                                                 | Triviales                                  |                            | Varían | No se sabe             |
| CERTEZA EN LA EVIDENCIA | Muy baja                                | Baja                                                  | Moderada                                                 | Alta                                       |                            |        | No incluyeron estudios |
| VALORES DE PACIENTES    | Importante incertidumbre o variabilidad | Probablemente importante incertidumbre o variabilidad | Probablemente no importante incertidumbre o variabilidad | No importante incertidumbre o variabilidad |                            |        |                        |
| BALANCE DE LOS EFECTOS  | Favorece al comparador                  | Probablemente favorece al comparador                  | No favorece ni a la intervención ni al comparador        | Probablemente favorece a la intervención   | Favorece a la intervención | Varían | No se sabe             |
| RECURSOS REQUERIDOS     | Grandes costos                          | Costos Moderados                                      | Costos y ahorros insignificantes                         | Moderados ahorros                          | Grandes Ahorros            | Varían | No se sabe             |
| EQUIDAD                 | Reducida                                | Probablemente reducida                                | Probablemente no impactada                               | Probablemente incrementada                 | Incrementada               | Varían | No se sabe             |
| ACEPTABILIDAD           | No                                      | Probablemente No                                      | Probablemente Si                                         | Si                                         |                            | Varían | No se sabe             |
| FACTIBILIDAD            | No                                      | Probablemente No                                      | Probablemente Si                                         | Si                                         |                            | Varían | No se sabe             |

## Tipo de Recomendación

| Recomendación fuerte en contra de la opción | Recomendación condicional en contra de la opción | Recomendación condicional a favor de cualquiera la opción o su comparador | Recomendación condicional a favor de la opción | Recomendación fuerte a favor de la opción |
|---------------------------------------------|--------------------------------------------------|---------------------------------------------------------------------------|------------------------------------------------|-------------------------------------------|
| ○                                           | ○                                                | ○                                                                         | ○                                              | ○                                         |

## Conclusiones

### Recomendación

En pacientes con espondiloartritis axial y manifestaciones axiales, se recomienda no usar DMARDs convencionales como opción terapéutica, Recomendación condicional en contra de la intervención. Certeza en la evidencia baja.

### Justificación

No se recomienda el uso de DMARDs convencionales como estrategia terapéutica en los pacientes con espondiloartritis axial dado que la certeza en la evidencia es baja por la calidad de los estudios primarios. Adicionalmente, la evidencia no muestra diferencias en las diferentes comparaciones (metotrexate, sulfasalazina y leflunomida vs placebo) en cada uno de los estudios que evalúan estas intervenciones. Aunque al parecer no hay diferencia en la presentación de eventos adversos, se presentan más riesgo de eventos adversos con DMARDs convencionales en estudios que evalúan estos medicamentos en otras patologías autoinmunes. Los pacientes no mostraron preferencia al uso de DMARDs como alternativa terapéutica.

### Consideraciones por subgrupos

No se identifican como necesarias.

### Consideraciones de implementación

No aplica

### Monitoreo y evaluación de cumplimiento

No aplica

### Prioridades de investigación futura

Ninguna

## TABLAS GRADE

Efectos deseables (beneficios de la opción a recomendar)

| Desenlaces                                                                              | Nº de participantes (estudios) Seguimiento | Certeza de la evidencia (GRADE) | Efecto relativo (95% IC) | Efectos absolutos anticipados* (95% CI) |                                                                               |
|-----------------------------------------------------------------------------------------|--------------------------------------------|---------------------------------|--------------------------|-----------------------------------------|-------------------------------------------------------------------------------|
|                                                                                         |                                            |                                 |                          | Riesgo con placebo                      | Diferencias de riesgos con MTX                                                |
| BASFI (puntaje de 0 a 10, 0=excelente, 10= mala función)<br><br>seguimiento: 24 semanas | 35 (1 estudio)                             | ⊕⊕○○ Bajo <sup>1</sup>          |                          | Cambio promedio<br>Puntaje BASFI 0,4    | Cambio promedio<br>Puntaje BASFI<br>0.9 menor<br>(0,43 menor a 2,23 más alto) |

Diferencia absoluta del riesgo 3% menor (IC 95% 1% A 6%); porcentaje de cambio relativo =6%(IC 95%: 2%a 12%)

| Desenlaces                                                                                      | Nº de participantes (estudios) Seguimiento | Certeza de la evidencia (GRADE) | Efecto relativo (95% IC) | Efectos absolutos anticipados* (95% CI) |                                                                  |
|-------------------------------------------------------------------------------------------------|--------------------------------------------|---------------------------------|--------------------------|-----------------------------------------|------------------------------------------------------------------|
|                                                                                                 |                                            |                                 |                          | Riesgo con placebo                      | Diferencias de riesgos con SLZ                                   |
| Lumbalgia <sup>a</sup><br>(datos agrupados)<br><br>EVA 0 a 100mm<br><br>seguimiento: 26 semanas | 454 (6 estudios)                           | ⊕⊕⊕○<br>Moderado <sup>2</sup>   |                          | Promedio<br>Puntaje<br>49,5mm           | promedio<br>Puntaje<br>0.9 menor<br>(0,43 menor a 2,23 más alto) |

Chen, J., Veras, M. M. S., Liu, C., & Lin, J. (2013, February 28). Methotrexate for ankylosing spondylitis. Cochrane Database of Systematic Reviews. John Wiley and Sons Ltd.

<https://doi.org/10.1002/14651858.CD004524.pub4> (2)

Chen, J., & Liu, C. (2014). Sulfasalazine for ankylosing spondylitis. [Review] [42 refs]. Cochrane Database Syst Rev, (2), CD004800.

<https://doi.org/10.1002/14651858.CD004800.pub3>[www.cochranelibrary.com](http://www.cochranelibrary.com) (3)

## Efectos Indeseables

| Desenlaces                                                      | Nº de participantes<br>(estudios)<br>Seguimiento | Certeza de la evidencia<br>(GRADE) | Efecto relativo<br>(95% IC) | Efectos absolutos anticipados* (95% CI) |                           |
|-----------------------------------------------------------------|--------------------------------------------------|------------------------------------|-----------------------------|-----------------------------------------|---------------------------|
|                                                                 |                                                  |                                    |                             | Riesgo con no MTX                       | Diferencia de riesgos MTX |
| Suspensión por algún efecto adverso.<br>Seguimiento: 24 semanas | 35<br>(1ECAs)                                    | ⊕⊕○○<br>Bajo                       | RR 1.06<br>(0.07 a 15.62)   | 56 por 1.000                            | 59 por 1.000<br>(4 a 868) |

  

| Desenlaces                                                      | Nº de participantes<br>(estudios)<br>Seguimiento | Certeza de la evidencia<br>(GRADE) | Efecto relativo<br>(95% IC) | Efectos absolutos anticipados* (95% CI) |                             |
|-----------------------------------------------------------------|--------------------------------------------------|------------------------------------|-----------------------------|-----------------------------------------|-----------------------------|
|                                                                 |                                                  |                                    |                             | Riesgo con placebo                      | Diferencia de riesgos SLZ   |
| Eventos adversos serios<br>Seguimiento: 26 semanas              | 264<br>(1 estudio)                               | ⊕⊕⊕○<br>Moderada                   | OR 7,5<br>(0,15 a 378,16)   | 0 por 1.000                             | 1 por 1.000                 |
| Suspensión por algún efecto adverso.<br>Seguimiento: 26 semanas | 895<br>(11ECAs)                                  | ⊕⊕⊕○<br>Moderada                   | RR 1,43<br>(1,04 a 1,94)    | 94 por 1.000                            | 134 por 1.000<br>(98 a 182) |

Chen, J., Veras, M. M. S., Liu, C., & Lin, J. (2013, February 28). Methotrexate for ankylosing spondylitis. Cochrane Database of Systematic Reviews. John Wiley and Sons Ltd.  
<https://doi.org/10.1002/14651858.CD004524.pub4> (2)

Chen, J., & Liu, C. (2014). Sulfasalazine for ankylosing spondylitis. [Review] [42 refs]. Cochrane Database Syst Rev, (2), CD004800.  
<https://doi.org/10.1002/14651858.CD004800.pub3>. [www.cochranelibrary.com](http://www.cochranelibrary.com) (3)

## Referencias

1. Liu CJ. Sulfasalazine for ankylosing spondylitis (Review) [Internet]. 2009. Available from: <http://www.thecochranelibrary.com>
2. Chen J, Veras M. Methotrexate for ankylosing spondylitis (Review) [Internet]. 2013. Available from: <http://www.thecochranelibrary.com>
3. Chen J, Liu LS. Sulfasalazine for ankylosing spondylitis (Review) [Internet]. 2014. Available from: <http://www.thecochranelibrary.com>
4. van Denderen JC, van der Paardt M, Nurmohamed MT, de Ryck YMMA, Dijkmans BAC, van der Horst-Bruinsma IE. Double blind, randomised, placebo controlled study of leflunomide in the treatment of active ankylosing spondylitis. *Annals of the Rheumatic Diseases*. 2005 Dec;64(12):1761–4.
5. Gamez-Nava Laura Gonzalez-Lopez JI, Garcia-Gonzalez A, Vazquez-Del-Mercado M. placebo controlled trial [Internet]. Vol. 31, *The Journal of Rheumatology* The Journal of on June. 2004. Available from: <http://www.jrheum.org/content/31/8/1568><http://www.jrheum.org/alerts1.SignupforTOCsandotheralerts><http://www.jrheum.com/faq>[www.jrheum.org](http://www.jrheum.org)Downloaded from
6. Clegg D O, Reda DJ, Weisman MH, Blackburn WD, Cush JJ, Cannon GW, et al. COMPARISON OF SULFASALAZINE AND PLACEBO IN THE TREATMENT OF ANKYLOSING SPONDYLITIS A Department of Veterans Affairs Cooperative Study. Vol. 39, *ARTHRITIS & RHEUMATISM*. 1996.
7. Dougados M, Boumier P, Amor B. PAPERS AND SHORT REPORTS Sulphasalazine in ankylosing spondylitis: a double blind controlled study in 60 patients. 1986.
8. Nissila M, Lehtinen K, Leirisalo-repo M, Luukkainen R, Yli-kerttula U. SULFASALAZINE IN THE TREATMENT OF ANKYLOSING SPONDYLITIS A Twenty-Six-Week, Placebo-Controlled Clinical Trial.
9. Schmidt S Wierth D Milleck WA, A Schmidt med S Wierth med W, Milleck med E med D, Droste med U. Sulfasalazin bei Spondylitis ankylosans: eine prospektive, randomisierte, doppelblinde, placebo-kontrollierte Studie und Vergleich mit anderen kontrollierten Studien. Vol. 61, *Z Rheumatol*. 2002.
10. Taylor H, Beswick E, Dawes P. Sulphasalazine in Ankylosing A Radiological, Clinical and Assessment Spondylitis. Laboratory. Vol. 10, *Clinical rheumatology*. 1991.
11. Winkler V. Sulphasalazine treatment in ankylosing spondylitis: A comparison of sulphasalazine with placebo. *Magyar Reumatologia* . 1989;30(Suppl):29–37.
12. Corkill MM, Jobanputra P, Gibson T, Macfarlane DG. A controlled trial of sulphasalazine treatment of chronic ankylosing spondylitis: A double blind controlled study in 60 patients. . *British Medical Journal*. 1986;293(6552):911–4.
13. DAVIS MJ, DAWES PT, BESWICK E, LEWIN I v., STANWORTH DR. SULPHASALAZINE THERAPY IN ANKYLOSING SPONDYLITIS: ITS EFFECT ON DISEASE ACTIVITY, IMMUNOGLOBULIN A AND THE

- COMPLEX IMMUNOGLOBULIN A-ALPHA-1-ANTITRYPSIN. *Rheumatology* [Internet]. 1989;28(5):410–3. Available from: <https://academic.oup.com/rheumatology/article-lookup/doi/10.1093/rheumatology/28.5.410>
14. Feltelius N, Hallgren R. Sulphasalazine in ankylosing spondylitis. *Annals of the Rheumatic Diseases* [Internet]. 1986 May 1;45(5):396–9. Available from: <http://ard.bmj.com/cgi/doi/10.1136/ard.45.5.396>
15. KIRWAN J, EDWARDS A, HUITFELDT B, THOMPSON P, CURREY H. THE COURSE OF ESTABLISHED ANKYLOSING SPONDYLITIS AND THE EFFECTS OF SULPHASALAZINE OVER 3 YEARS. *Rheumatology* [Internet]. 1993;32(8):729–33. Available from: <https://academic.oup.com/rheumatology/article-lookup/doi/10.1093/rheumatology/32.8.729>
16. I Krajnc. Sulfasalazine in the Treatment of Ankylosing Spondylitis. *Lijec Vjesn.* 1990;112((5-6)):171–4.
17. Kelly A, Tymms K, Tunnicliffe DJ, Sumpton D, Perera C, Fallon K, et al. Patients' Attitudes and Experiences of Disease-Modifying Antirheumatic Drugs in Rheumatoid Arthritis and Spondyloarthritis: A Qualitative Synthesis. *Arthritis Care and Research.* 2018 Apr 1;70(4):525–32.

## Pregunta 5:

¿En pacientes adultos con Espondiloartritis Axial se debe usar los analgésicos convencionales (acetaminofén, opioides) por su efectividad (mejoría de escalas de dolor y calidad de vida) y seguridad (eventos adversos)?

|              |                                                                                                  |
|--------------|--------------------------------------------------------------------------------------------------|
| Población    | Pacientes con espondiloartritis Axial (EspAax) que tengan contraindicación de AINES              |
| Intervención | Acetaminofén, opioides                                                                           |
| Comparación  | Cuidado estándar/placebo                                                                         |
| Desenlaces   | Efectividad: mejoría escalas del dolor, calidad de vida<br>Perfil de seguridad: Eventos adversos |

## Antecedentes

La espondiloartritis es una enfermedad reumática que se caracteriza por la presencia de inflamación crónica articular, tiene dos presentaciones una periférica y una axial, esta última puede cursar con y sin sacroileítis radiográfica. Dentro de los objetivos terapéuticos de esta enfermedad se encuentra el control de dolor, disminución de la progresión de la enfermedad y mejoría en la funcionalidad (1).

En el manejo de la espondilitis anquilosante (EA), los antiinflamatorios no esteroideos (AINES) han sido considerados la primera línea de manejo para el control de síntomas (2), sin embargo, existen pacientes con contraindicación en el consumo de AINES por mayor riesgo de eventos adversos o intolerancia a estos; los agentes biológicos anti-TNF son los más efectivos en el tratamiento espondiloartritis axial (2) pero el costo puede limitar su uso en los países en desarrollo. Se han postulado algunas indicaciones de administración de otros analgésicos como acetaminofén y opioides para el control del dolor, sin embargo, aún no es clara la pertinencia de esta práctica y el real beneficio para los pacientes con EspAax. Aquí se revisa la evidencia sobre su potencial beneficio en el tratamiento de la espondiloartritis axial con el fin de generar una recomendación sobre su uso en esta entidad.

## Evidencia

La búsqueda de la literatura realizada (ver anexo-Excel) no identificó ningún estudio que haya evaluado este tratamiento únicamente en pacientes con espondiloartritis axial.

Se encontró un estudio realizado por Chang en el año 2013 (3) en Taiwan, de 12 semanas de duración que evaluó 60 pacientes con diagnóstico de espondilitis anquilosante de acuerdo con la escala de Nueva York modificada y el índice de actividad de espondilitis anquilosante de Bath (BASDAI). Los pacientes del grupo de intervención recibieron tramadol 37,5 mg/ acetaminofén 325mg tabletas combinadas dos veces al día más aclofenaco 100 mg dos veces al día, el grupo control recibió placebo más aclofenaco 100 mg dos veces al día. El desenlace primario fue 20% de mejoría de acuerdo con los criterios de evaluación en espondilitis anquilosante (ASAS20) en la semana 12, los desenlaces



secundarios fueron cambio promedio en la evaluación global del paciente, evaluación global física, Escala visual análoga del dolor (EVA) en 10 cm, BASDAI, BASFI y movilidad espinal, también se evaluó reactantes inflamatorios proteína C reactiva (PCR) y velocidad de sedimentación globular (VSG)

### Control enfermedad por remisión/baja actividad de síntomas

#### *Mejoría del 20% de acuerdo con los criterios de evaluación en espondilitis anquilosante (ASAS20)*

Para este desenlace el estudio de Chang 2013 (4) mostró a la semana 12 una mejoría en el ASAS20 de 53% en el grupo que recibió acetaminofén/tramadol vs el 31% que recibió placebo sin embargo este resultado no fue estadísticamente significativo (RR 1,78 IC95% [0,94;3,37]). Los demás desenlaces contemplados en el estudio tampoco mostraron diferencias estadísticamente significativas. La calidad de la evidencia fue baja por impresión en los resultados y poca claridad en el cegamiento a los investigadores

### Seguridad

En el estudio de Chang 2013 (4), el grupo tratado con tramadol/acetaminofén presentó 64,2% de eventos adversos comparado con el grupo placebo 35,8% ( $p < 0.001$ ). Los eventos adversos que mostraron diferencias entre los dos grupos fueron discinesias, náusea y vómito, vértigo y elevación ligera de ALT. La calidad de la evidencia para este desenlace fue baja por impresión en los resultados y poca claridad en el cegamiento a los investigadores

### Valores y preferencia de pacientes

No se identificaron estudios de preferencias de pacientes sobre este tipo de tratamiento en EspA. Sin embargo, importante destacar que el valor de la terapia analgésica ya sea con monoterapia o en combinación de tratamientos, para pacientes con enfermedades reumáticas que tienen dolor persistente, es muy alto. Si bien se necesitan estudios bien diseñados para abordar esta pregunta, es predecible que los pacientes preferirán el medicamento que les proporcione mayor control del dolor articular.

La evidencia sobre efectos gastrointestinales de algunos medicamentos usados para el control del dolor, puede ser un aspecto a considerar para evitar deteriorar la calidad de vida de los pacientes con EspA.

Dau en el año 2018 (5) y Sloan en el año 2019 (6) realizaron dos estudios observacionales analíticos (Cohortes) donde evaluaban el uso de opioides para el manejo del dolor en espondilitis anquilosante en pacientes de Estados Unidos. Los autores reportan que el uso de opioides fue más común a lo esperado en este tipo de pacientes hasta del 76,7%. Los pacientes que presentaron uso crónico de opioides refirieron largo tiempo de la enfermedad, tabaquismo, falta de ejercicio, alta actividad de la enfermedad, deterioro funcional y depresión. El análisis multivariado mostró la asociación de uso crónico de opioides con el tabaquismo, la edad avanzada y la administración crónica de inhibidores del factor de necrosis tumoral y drogas psicoactivas.

### Costos

No se identificaron estudios que evaluaran el impacto económico de estas intervenciones.

## Marco de trabajo –De la evidencia a las decisiones

| PREGUNTA               |                                                                              |
|------------------------|------------------------------------------------------------------------------|
| POBLACION              | Población de espondilitis Anquilosante                                       |
| INTERVENCIÓN           | Acetaminofén/ opioides                                                       |
| COMPARACIÓN            | Cuidado estándar                                                             |
| DESENLACES PRINCIPALES | Efectividad- Respuesta terapéutica<br>Perfil de seguridad – EVENTOS ADVERSOS |
| ÁMBITO                 | Ambulatorio                                                                  |
| PERSPECTIVA            | Del grupo desarrollador de la Guía                                           |
| CONFLICTO DE INTERÉS:  | No se manifiesta ningún conflicto de interés                                 |

## Evaluación

| Problema                                                                                                                                                                    |                                                                                                                                                                                                                                                                                                                                                                                                                                                                                                                                                                                                                                                                                                                                                                                                                                                                                                                                                                                                                                                                                                                                                                                                                                                                                                                                                                                                                                                                                                                                                                                                                                                                                                                                                      |                                                                                                                                                                                                                                                                                                                                                                                                                                                                                                                                                                                                                                                                                    |
|-----------------------------------------------------------------------------------------------------------------------------------------------------------------------------|------------------------------------------------------------------------------------------------------------------------------------------------------------------------------------------------------------------------------------------------------------------------------------------------------------------------------------------------------------------------------------------------------------------------------------------------------------------------------------------------------------------------------------------------------------------------------------------------------------------------------------------------------------------------------------------------------------------------------------------------------------------------------------------------------------------------------------------------------------------------------------------------------------------------------------------------------------------------------------------------------------------------------------------------------------------------------------------------------------------------------------------------------------------------------------------------------------------------------------------------------------------------------------------------------------------------------------------------------------------------------------------------------------------------------------------------------------------------------------------------------------------------------------------------------------------------------------------------------------------------------------------------------------------------------------------------------------------------------------------------------|------------------------------------------------------------------------------------------------------------------------------------------------------------------------------------------------------------------------------------------------------------------------------------------------------------------------------------------------------------------------------------------------------------------------------------------------------------------------------------------------------------------------------------------------------------------------------------------------------------------------------------------------------------------------------------|
| Es el problema una prioridad?                                                                                                                                               |                                                                                                                                                                                                                                                                                                                                                                                                                                                                                                                                                                                                                                                                                                                                                                                                                                                                                                                                                                                                                                                                                                                                                                                                                                                                                                                                                                                                                                                                                                                                                                                                                                                                                                                                                      |                                                                                                                                                                                                                                                                                                                                                                                                                                                                                                                                                                                                                                                                                    |
| JUICIO                                                                                                                                                                      | EVIDENCIA DE LA INVESTIGACION                                                                                                                                                                                                                                                                                                                                                                                                                                                                                                                                                                                                                                                                                                                                                                                                                                                                                                                                                                                                                                                                                                                                                                                                                                                                                                                                                                                                                                                                                                                                                                                                                                                                                                                        | CONSIDERACIONES ADICIONALES                                                                                                                                                                                                                                                                                                                                                                                                                                                                                                                                                                                                                                                        |
| <ul style="list-style-type: none"> <li>○ No</li> <li>○ Probablemente No</li> <li>○ Probablemente Si</li> <li>○ Si</li> <li>○ Es variable</li> <li>○ No se conoce</li> </ul> | <p>La espondiloartritis es una enfermedad reumática que se caracteriza por la presencia de inflamación crónica articular, tiene dos presentaciones una periférica y una axial, esta última puede cursar con y sin sacroileítis radiográfica. Dentro de los objetivos terapéuticos de esta enfermedad se encuentra el control de dolor, disminución de la progresión de la enfermedad y mejoría en la funcionalidad (1).</p> <p>En el manejo de la espondilitis anquilosante (EA), los antiinflamatorios no esteroideos (AINES) han sido considerados la primera línea de manejo para el control de síntomas (2), sin embargo, existen pacientes con contraindicación en el consumo de AINES por mayor riesgo de eventos adversos o intolerancia a estos; los agentes biológicos anti-TNF son los más efectivos en el tratamiento espondiloartritis axial (2) pero el costo puede limitar su uso en los países en desarrollo.</p> <p>Se han encontrado algunas indicaciones de administración de otros analgésicos como acetaminofén y opioides para el control del dolor, a pesar de esta consideración, no es clara la evidencia disponible al respecto.</p> <p>Regel A, Sepriano A, Baraliakos X, Van der Heijde D, Braun J, Landewé R, et al. Efficacy and safety of non-pharmacological and non-biological pharmacological treatment: a systematic literature review informing the 2016 update of the ASAS/EULAR recommendations for the management of axial spondyloarthritis. RMD Open 2017; 3: e000397. doi: 10.1136/rmdopen-2016-000397 (7)</p> <p>Ramiro S, Radner H, Van der heijde D, et al. Combination therapy for pain manegement in inflammatory arthritis. J Rheumatol Supp. 2012 Sep; 90: 47-55. doi: 10.3899/jrheum.120342 (8)</p> | <p>El problema es de prioridad variable debido a que en el escenario clínico no es tan frecuente encontrar pacientes con EAS axial o EA con contraindicación o intolerancia al uso de AINES toda vez que esta población generalmente es menor de 45 años, y si requieren escalonamiento terapéutico la indicación es el uso de terapia biológica; sin embargo algunos pacientes presentan comorbilidades asociadas como reumatismo de partes blandas o fibromialgia, o daño estructural por la enfermedad, en cuyo caso la indicación de analgésico es para esta comorbilidad. Lo anterior puede explicar porque la evidencia es casi nula en la población con EAS axial o EA.</p> |

| Efectos deseables (beneficios de la opción a recomendar)                                                                                                                                                                                                                               |                               |                                |                                 |                                                                                                                                                                                                                                                                                                                                                                                             |                            |
|----------------------------------------------------------------------------------------------------------------------------------------------------------------------------------------------------------------------------------------------------------------------------------------|-------------------------------|--------------------------------|---------------------------------|---------------------------------------------------------------------------------------------------------------------------------------------------------------------------------------------------------------------------------------------------------------------------------------------------------------------------------------------------------------------------------------------|----------------------------|
| ¿Qué tan sustanciales son los efectos deseables de la opción?                                                                                                                                                                                                                          |                               |                                |                                 |                                                                                                                                                                                                                                                                                                                                                                                             |                            |
| JUICIO                                                                                                                                                                                                                                                                                 | EVIDENCIA DE LA INVESTIGACION |                                |                                 | CONSIDERACIONES ADICIONALES                                                                                                                                                                                                                                                                                                                                                                 |                            |
| <ul style="list-style-type: none"><li>○ Triviales</li><li>○ Pequeños</li><li>○ Moderados</li><li>○ Grandes</li><li>○ Varían</li><li>○ No se sabe</li></ul>                                                                                                                             |                               |                                |                                 | La evidencia es escasa y pobre y las guías existentes que emiten una recomendación como la canadiense lo hacen como una recomendación de expertos, la guía NICE lo sugiere, pero redireccionan al lector a guías de manejo de dolor, la española solo lo mencionan en la sección para pacientes y en la francesa lo describen como una alternativa sin evidencia científica que la soporte. |                            |
|                                                                                                                                                                                                                                                                                        | Desenlaces                    | Nº de participantes (estudios) | Certeza de la evidencia (GRADE) |                                                                                                                                                                                                                                                                                                                                                                                             | Efecto Relativo (95% CI)   |
|                                                                                                                                                                                                                                                                                        | Respuesta terapuetica-ASAS20  | 1 ECAs (60)                    | ⊕⊕○○ Baja                       |                                                                                                                                                                                                                                                                                                                                                                                             | RR 1,78 IC95% [0,94;3,37]. |
| Chang, J. K., Yu, C. T., Lee, M. Y., Yeo, K., Chang, I. C., Tsou, H. K., & Wei, J. C. (2013). Tramadol/acetaminophen combination as add-on therapy in the treatment of patients with ankylosing spondylitis. <i>Clin Rheumatol</i> , 32(3), 341-347. doi:10.1007/s10067-012-2125-y (3) |                               |                                |                                 |                                                                                                                                                                                                                                                                                                                                                                                             |                            |

| Efectos Indeseables                                                                                                                                               |                                                                                                                                                                                                                                                                                                                                                                                                                                                                                                                                                                                                                                                                                                                                                                                                                                                                                                                                                                     |                                 |                             |                                |                                 |                          |                  |            |           |                           |  |
|-------------------------------------------------------------------------------------------------------------------------------------------------------------------|---------------------------------------------------------------------------------------------------------------------------------------------------------------------------------------------------------------------------------------------------------------------------------------------------------------------------------------------------------------------------------------------------------------------------------------------------------------------------------------------------------------------------------------------------------------------------------------------------------------------------------------------------------------------------------------------------------------------------------------------------------------------------------------------------------------------------------------------------------------------------------------------------------------------------------------------------------------------|---------------------------------|-----------------------------|--------------------------------|---------------------------------|--------------------------|------------------|------------|-----------|---------------------------|--|
| ¿Qué tan sustanciales son los efectos indeseables que se pueden anticipar?                                                                                        |                                                                                                                                                                                                                                                                                                                                                                                                                                                                                                                                                                                                                                                                                                                                                                                                                                                                                                                                                                     |                                 |                             |                                |                                 |                          |                  |            |           |                           |  |
| JUICIO                                                                                                                                                            | EVIDENCIA DE LA INVESTIGACION                                                                                                                                                                                                                                                                                                                                                                                                                                                                                                                                                                                                                                                                                                                                                                                                                                                                                                                                       |                                 | CONSIDERACIONES ADICIONALES |                                |                                 |                          |                  |            |           |                           |  |
| <ul style="list-style-type: none"> <li>○ Triviales</li> <li>○ Pequeños</li> <li>○ Moderados</li> <li>○ Grandes</li> <li>○ Varían</li> <li>○ No se sabe</li> </ul> | <p>El estudio de Chang 2013 (3) mostró que, en el grupo de tramadol/acetaminofén se presentaron mayores eventos adversos comparado con el grupo placebo (<math>p &lt; 0.001</math>).</p> <p>Los eventos adversos que mostraron diferencias entre los dos grupos fueron discinesias, náusea y vómito, vértigo y elevación ligera de ALT.</p> <table border="1"> <thead> <tr> <th>Desenlaces</th><th>Nº de participantes (estudios)</th><th>Certeza de la evidencia (GRADE)</th><th>Efecto Relativo (95% CI)</th></tr> </thead> <tbody> <tr> <td>Eventos adversos</td><td>1 ECA (60)</td><td>⊕⊕○○ Baja</td><td>RR 1,75 IC95% (1,27-2,03)</td></tr> </tbody> </table> <p>Chang, J. K., Yu, C. T., Lee, M. Y., Yeo, K., Chang, I. C., Tsou, H. K., &amp; Wei, J. C. (2013). Tramadol/acetaminophen combination as add-on therapy in the treatment of patients with ankylosing spondylitis. <i>Clin Rheumatol</i>, 32(3), 341-347. doi:10.1007/s10067-012-2125-y (3)</p> |                                 | Desenlaces                  | Nº de participantes (estudios) | Certeza de la evidencia (GRADE) | Efecto Relativo (95% CI) | Eventos adversos | 1 ECA (60) | ⊕⊕○○ Baja | RR 1,75 IC95% (1,27-2,03) |  |
| Desenlaces                                                                                                                                                        | Nº de participantes (estudios)                                                                                                                                                                                                                                                                                                                                                                                                                                                                                                                                                                                                                                                                                                                                                                                                                                                                                                                                      | Certeza de la evidencia (GRADE) | Efecto Relativo (95% CI)    |                                |                                 |                          |                  |            |           |                           |  |
| Eventos adversos                                                                                                                                                  | 1 ECA (60)                                                                                                                                                                                                                                                                                                                                                                                                                                                                                                                                                                                                                                                                                                                                                                                                                                                                                                                                                          | ⊕⊕○○ Baja                       | RR 1,75 IC95% (1,27-2,03)   |                                |                                 |                          |                  |            |           |                           |  |

| Certeza en la Evidencia                                                                                                                                                |                                                                                                                                                                                                                                                                                                                                                                                                                                                                                                                                   |                                                                                                                                                                                                                                                                                                            |                      |                                 |                                                                    |          |              |                  |          |              |  |
|------------------------------------------------------------------------------------------------------------------------------------------------------------------------|-----------------------------------------------------------------------------------------------------------------------------------------------------------------------------------------------------------------------------------------------------------------------------------------------------------------------------------------------------------------------------------------------------------------------------------------------------------------------------------------------------------------------------------|------------------------------------------------------------------------------------------------------------------------------------------------------------------------------------------------------------------------------------------------------------------------------------------------------------|----------------------|---------------------------------|--------------------------------------------------------------------|----------|--------------|------------------|----------|--------------|--|
| ¿Cuál es la certeza en la evidencia global sobre los efectos de la opción a recomendar?                                                                                |                                                                                                                                                                                                                                                                                                                                                                                                                                                                                                                                   |                                                                                                                                                                                                                                                                                                            |                      |                                 |                                                                    |          |              |                  |          |              |  |
| JUICIO                                                                                                                                                                 | EVIDENCIA DE LA INVESTIGACION                                                                                                                                                                                                                                                                                                                                                                                                                                                                                                     | CONSIDERACIONES ADICIONALES                                                                                                                                                                                                                                                                                |                      |                                 |                                                                    |          |              |                  |          |              |  |
| <ul style="list-style-type: none"> <li>○ Muy baja</li> <li>○ <b>Baja</b></li> <li>○ Moderada</li> <li>○ Alta</li> <li>○ No se identificaron estudios</li> </ul>        | <p>La certeza en la evidencia para todos los desenlaces de efectividad y de seguridad es baja.</p> <table border="1"> <thead> <tr> <th>Desenlace</th><th>Importancia Relativa</th><th>Certeza de la evidencia (GRADE)</th></tr> </thead> <tbody> <tr> <td>Control enfermedad por remisión/baja actividad de síntomas ASAS 20</td><td>CRITICAL</td><td>⊕⊕○○<br/>Baja</td></tr> <tr> <td>Eventos adversos</td><td>CRITICAL</td><td>⊕⊕○○<br/>Baja</td></tr> </tbody> </table>                                                        | Desenlace                                                                                                                                                                                                                                                                                                  | Importancia Relativa | Certeza de la evidencia (GRADE) | Control enfermedad por remisión/baja actividad de síntomas ASAS 20 | CRITICAL | ⊕⊕○○<br>Baja | Eventos adversos | CRITICAL | ⊕⊕○○<br>Baja |  |
| Desenlace                                                                                                                                                              | Importancia Relativa                                                                                                                                                                                                                                                                                                                                                                                                                                                                                                              | Certeza de la evidencia (GRADE)                                                                                                                                                                                                                                                                            |                      |                                 |                                                                    |          |              |                  |          |              |  |
| Control enfermedad por remisión/baja actividad de síntomas ASAS 20                                                                                                     | CRITICAL                                                                                                                                                                                                                                                                                                                                                                                                                                                                                                                          | ⊕⊕○○<br>Baja                                                                                                                                                                                                                                                                                               |                      |                                 |                                                                    |          |              |                  |          |              |  |
| Eventos adversos                                                                                                                                                       | CRITICAL                                                                                                                                                                                                                                                                                                                                                                                                                                                                                                                          | ⊕⊕○○<br>Baja                                                                                                                                                                                                                                                                                               |                      |                                 |                                                                    |          |              |                  |          |              |  |
| Valores de los pacientes                                                                                                                                               |                                                                                                                                                                                                                                                                                                                                                                                                                                                                                                                                   |                                                                                                                                                                                                                                                                                                            |                      |                                 |                                                                    |          |              |                  |          |              |  |
| ¿Hay variación o poca certeza sobre cómo valoran las personas/los pacientes los desenlaces principales?                                                                |                                                                                                                                                                                                                                                                                                                                                                                                                                                                                                                                   |                                                                                                                                                                                                                                                                                                            |                      |                                 |                                                                    |          |              |                  |          |              |  |
| JUICIO                                                                                                                                                                 | EVIDENCIA DE LA INVESTIGACION                                                                                                                                                                                                                                                                                                                                                                                                                                                                                                     | CONSIDERACIONES ADICIONALES                                                                                                                                                                                                                                                                                |                      |                                 |                                                                    |          |              |                  |          |              |  |
| <ul style="list-style-type: none"> <li>○ Variabilidad o incertidumbre importante</li> <li>○ <b>Posiblemente hay variabilidad o incertidumbre importante</b></li> </ul> | <p>Dau en el año 2018 (5) y Sloan en el año 2019 (6) realizaron dos estudios observacionales analíticos (Cohortes) donde evaluaban el uso de opioides para el manejo del dolor en espondilitis anquilosante en estados Unidos, encontrando que el uso de opioides fue común mayor a la esperada para este tipo de pacientes hasta del 76,7%. Los factores más asociados al uso crónico fueron largo tiempo de la enfermedad, tabaquismo, falta de ejercicio, alta actividad de la enfermedad, deterioro funcional y depresión</p> | <p>Durante la práctica clínica en el caso que se presente la necesidad de este tipo de intervención para pacientes con EAS axial o EA, el médico debe explicar al paciente el riesgo/beneficio y de esta manera lograr una prescripción consensuada entre las partes. Debe tenerse en cuenta que en la</p> |                      |                                 |                                                                    |          |              |                  |          |              |  |

|                                                                                                                                                                                                                                                                                                                 |                                                                                                                                                                                                                     |                                                                                                                                                                                                                                                                                                                                                                                                                                                                                                                                                                                                                                                                                                                                                                                                                                                                                                                                                                                                        |
|-----------------------------------------------------------------------------------------------------------------------------------------------------------------------------------------------------------------------------------------------------------------------------------------------------------------|---------------------------------------------------------------------------------------------------------------------------------------------------------------------------------------------------------------------|--------------------------------------------------------------------------------------------------------------------------------------------------------------------------------------------------------------------------------------------------------------------------------------------------------------------------------------------------------------------------------------------------------------------------------------------------------------------------------------------------------------------------------------------------------------------------------------------------------------------------------------------------------------------------------------------------------------------------------------------------------------------------------------------------------------------------------------------------------------------------------------------------------------------------------------------------------------------------------------------------------|
| <ul style="list-style-type: none"> <li>○ Posiblemente No hay variabilidad o incertidumbre importante</li> <li>○ No hay variabilidad o incertidumbre importante</li> </ul>                                                                                                                                       | <p>El análisis multivariado mostró la asociación de uso crónico de opioides con el tabaquismo, la edad avanzada y la administración cotica de inhibidores del factor de necrosis tumoral y drogas psicoactivas.</p> | <p>práctica diaria hay mucho temor entre los pacientes para el uso de opioides, y aún más cuando se tienen establecidos tratamientos eficaces en procesos inflamatorios.</p>                                                                                                                                                                                                                                                                                                                                                                                                                                                                                                                                                                                                                                                                                                                                                                                                                           |
| <p><b>Balance de los efectos</b></p> <p>¿El balance entre los efectos deseables e indeseables favorece la opción o el comparador?</p>                                                                                                                                                                           |                                                                                                                                                                                                                     |                                                                                                                                                                                                                                                                                                                                                                                                                                                                                                                                                                                                                                                                                                                                                                                                                                                                                                                                                                                                        |
| <b>JUICIO</b>                                                                                                                                                                                                                                                                                                   | <b>EVIDENCIA DE LA INVESTIGACION</b>                                                                                                                                                                                | <b>CONSIDERACIONES ADICIONALES</b>                                                                                                                                                                                                                                                                                                                                                                                                                                                                                                                                                                                                                                                                                                                                                                                                                                                                                                                                                                     |
| <ul style="list-style-type: none"> <li>○ Favorece al comparador</li> <li>○ Probablemente favorece al comparador</li> <li>○ No favorece al comparador ni a la opción en evaluación</li> <li>○ Probablemente favorece a la opción</li> <li>○ Favorece la opción</li> <li>○ Varía</li> <li>○ No se sabe</li> </ul> |                                                                                                                                                                                                                     | <p>Es claro que para el manejo de dolor en la EAS axial y la EA el tratamiento de elección son los AINES lo cual está sustentado por su fisiopatología y demostrado en evidencia científica de calidad, así la intervención con analgésicos es una opción adicional en situaciones específicas cuya evidencia es pobre y no tiene contundencia científica para este tipo de enfermedades, además su eficacia en estas situaciones parece deberse a dolor desencadenado por aspectos diferentes a la etiopatogénesis de la enfermedad inflamatoria.</p> <p>Chang, J. K., Yu, C. T., Lee, M. Y., Yeo, K., Chang, I. C., Tsou, H. K., &amp; Wei, J. C. (2013). Tramadol/acetaminophen combination as add-on therapy in the treatment of patients with ankylosing spondylitis. Clin Rheumatol, 32(3), 341-347. doi:10.1007/s10067-012-2125-y (3)</p> <p>Dau J, lee M, Ward M, et al. Opioid Analgesic Use in Patients With Ankylosing Spondylitis: An Analysis of the Prospective Study of Outcomes in</p> |

|                                                                                                                                                                                                                                                                                                                  |                                       |                                                                                                                                                                                                                                                                                                                                                                                                             |
|------------------------------------------------------------------------------------------------------------------------------------------------------------------------------------------------------------------------------------------------------------------------------------------------------------------|---------------------------------------|-------------------------------------------------------------------------------------------------------------------------------------------------------------------------------------------------------------------------------------------------------------------------------------------------------------------------------------------------------------------------------------------------------------|
|                                                                                                                                                                                                                                                                                                                  |                                       | <p>an Ankylosing Spondylitis Cohort. J Rheumatol. 2018 Feb;45(2):188-194. doi: 10.3899/jrheum.170630 (5)</p> <p>Sloan V, Sheahan A, Stark J and Suruki R. Opioid Use in Patients with Ankylosing Spondylitis Is Common in the United States: Outcomes of a Retrospective Cohort Study. J rheum 2019; DOI: <a href="https://doi.org/10.3899/jrheum.180972">https://doi.org/10.3899/jrheum.180972</a> (6)</p> |
| <b>Recursos Requeridos y costos</b><br>Que tanto es el requerimiento de recursos (costos)?                                                                                                                                                                                                                       |                                       |                                                                                                                                                                                                                                                                                                                                                                                                             |
| <b>JUICIO</b>                                                                                                                                                                                                                                                                                                    | <b>EVIDENCIA DE LA INVESTIGACION</b>  | <b>CONSIDERACIONES ADICIONALES</b>                                                                                                                                                                                                                                                                                                                                                                          |
| <input type="radio"/> Grandes costos<br><input type="radio"/> Costos moderados<br><input type="radio"/> no significantes<br>costos ni ahorros<br><input type="radio"/> Moderados ahorros<br><input type="radio"/> Grandes ahorros<br><input type="radio"/> Varían<br><input checked="" type="radio"/> No se sabe | No se encontró evidencia relacionada. |                                                                                                                                                                                                                                                                                                                                                                                                             |

|                                                                                  |                                      |                                    |
|----------------------------------------------------------------------------------|--------------------------------------|------------------------------------|
| <b>Equidad</b><br>¿La implementación de la opción, tendrá impacto en la equidad? |                                      |                                    |
| <b>JUICIO</b>                                                                    | <b>EVIDENCIA DE LA INVESTIGACION</b> | <b>CONSIDERACIONES ADICIONALES</b> |



|                                                                                                                                                                                                                                                          |                                                                                                                                                                                                                                                                                                                                                                                                                                         |                                                                                                                                                                                                                                                                                                                             |
|----------------------------------------------------------------------------------------------------------------------------------------------------------------------------------------------------------------------------------------------------------|-----------------------------------------------------------------------------------------------------------------------------------------------------------------------------------------------------------------------------------------------------------------------------------------------------------------------------------------------------------------------------------------------------------------------------------------|-----------------------------------------------------------------------------------------------------------------------------------------------------------------------------------------------------------------------------------------------------------------------------------------------------------------------------|
| <ul style="list-style-type: none"> <li>○ Reduce</li> <li>○ Probablemente se reduce la equidad</li> <li>○ Probablemente no impacta la equidad</li> <li>○ Probablemente incrementa</li> <li>○ Incrementa</li> <li>○ Varía</li> <li>○ No se sabe</li> </ul> | No se encontró evidencia suficiente sobre el impacto en la equidad                                                                                                                                                                                                                                                                                                                                                                      |                                                                                                                                                                                                                                                                                                                             |
| <b>Aceptabilidad</b><br>¿Es la opción aceptada por los diferentes actores involucrados en su implementación?                                                                                                                                             |                                                                                                                                                                                                                                                                                                                                                                                                                                         |                                                                                                                                                                                                                                                                                                                             |
| <b>JUICIO</b>                                                                                                                                                                                                                                            | <b>EVIDENCIA DE LA INVESTIGACION</b>                                                                                                                                                                                                                                                                                                                                                                                                    | <b>CONSIDERACIONES ADICIONALES</b>                                                                                                                                                                                                                                                                                          |
| <ul style="list-style-type: none"> <li>○ No</li> <li>○ Probablemente no</li> <li>○ Probablemente si</li> <li>○ Si</li> <li>○ Varía</li> <li>○ No se sabe</li> </ul>                                                                                      | Las diferentes guías de práctica clínica (canadiense, francesa, NICE y española) han tenido en cuenta este tratamiento como una alternativa en los pacientes con intolerancia o contraindicación a los AINES o como una terapia asociada para el manejo sintomático en los pacientes que ya cuenta con una terapia de base, como mención o como una recomendación de expertos por la pobre y no contundente evidencia en la literatura. | Debe someterse la consideración de esta intervención a consenso de expertos teniendo en cuenta la pobre y no contundente evidencia de la literatura al respecto.                                                                                                                                                            |
| <b>Factibilidad</b><br>¿Es la opción factible de IMPLEMENTAR?                                                                                                                                                                                            |                                                                                                                                                                                                                                                                                                                                                                                                                                         |                                                                                                                                                                                                                                                                                                                             |
| <b>JUICIO</b>                                                                                                                                                                                                                                            | <b>EVIDENCIA DE LA INVESTIGACION</b>                                                                                                                                                                                                                                                                                                                                                                                                    | <b>CONSIDERACIONES ADICIONALES</b>                                                                                                                                                                                                                                                                                          |
| <ul style="list-style-type: none"> <li>No</li> <li>○ Probablemente no</li> <li>○ Probablemente si</li> <li>○ Si</li> <li>○ Varía</li> <li>○ No se sabe</li> </ul>                                                                                        | No se encontraron estudios de factibilidad de pacientes en espondiloartritis con relación a los procesos diagnósticos                                                                                                                                                                                                                                                                                                                   | A pesar de no existir evidencia científica acerca de la implementación de esta intervención para pacientes con EAS axial y EA, la disponibilidad de la intervención (analgésicos tipo acetaminofén y opioides) y los costos de los medicamentos en nuestro sistema de salud colombiano, es completamente viable realizar la |

|  |  |                                                                                            |
|--|--|--------------------------------------------------------------------------------------------|
|  |  | implementación posterior a emitir una recomendación de expertos de la sociedad científica. |
|--|--|--------------------------------------------------------------------------------------------|

## Resumen de Juicios

|                         | JUICIOS                                 |                                                      |                                                              |                                            |                            |       |                     |
|-------------------------|-----------------------------------------|------------------------------------------------------|--------------------------------------------------------------|--------------------------------------------|----------------------------|-------|---------------------|
| PROBLEMA                | No                                      | Probablemente no                                     | Probablemente si                                             | Si                                         |                            | Varia | No se sabe          |
| EFFECTOS DESEABLES      | Trivial                                 | Pequeño                                              | Moderado                                                     | Grande                                     |                            | Varia | No se sabe          |
| EFFECTOS INDESEABLES    | Grande                                  | Moderado                                             | Pequeño                                                      | Trivial                                    |                            | Varia | No se sabe          |
| CERTEZA EN LA EVIDENCIA | Muy Bajo                                | Bajo                                                 | Moderado                                                     | Alto                                       |                            |       | No incluyó estudios |
| VALORES DE PACIENTES    | Importante incertidumbre o variabilidad | Posiblemente importante incertidumbre o variabilidad | Probablemente no hay importante incertidumbre o variabilidad | No importante incertidumbre o variabilidad |                            |       |                     |
| BALANCE DE LOS EFECTOS  | Favorece al comparador                  | Probablemente Favorece al comparador                 | No favorece ni a la intervención ni al comparador            | Probablemente favorece a la intervención   | Favorece a la intervención | Varia | No se sabe          |
| RECURSOS REQUERIDOS     | Grandes costos                          | Moderados costos                                     | Costos y ahorros insignificantes                             | Moderados ahorros                          | Grandes ahorros            | Varia | No se sabe          |

|               | JUICIOS  |                        |                            |                            |              |       |            |
|---------------|----------|------------------------|----------------------------|----------------------------|--------------|-------|------------|
| EQUIDAD       | Reducida | Probablemente reducida | Probablemente no impactada | Probablemente incrementada | Incrementada | Varia | No se sabe |
| ACEPTABILIDAD | No       | Probablemente no       | Probablemente si           | Si                         |              | Varia | No se sabe |
| FACTIBILIDAD  | No       | Probablemente no       | Probablemente si           | Si                         |              | Varia | No se sabe |

## Tipo de Recomendación

|                                             |                                                  |                                                                           |                                                |                                           |
|---------------------------------------------|--------------------------------------------------|---------------------------------------------------------------------------|------------------------------------------------|-------------------------------------------|
| Recomendación fuerte en contra de la opción | Recomendación condicional en contra de la opción | Recomendación condicional a favor de cualquiera la opción o su comparador | Recomendación condicional a favor de la opción | Recomendación fuerte a favor de la opción |
| ○                                           | ○                                                | ○                                                                         | ○                                              | ○                                         |

## Conclusiones

### Recomendación

En pacientes con espondiloartritis axial, que presentan intolerancia y/o contraindicación a la terapia con AINES o quienes presenten dolor residual a pesar de un tratamiento adecuadamente instaurado, se sugiere el uso de acetaminofén u opioides para el control del dolor.

Recomendación condicional a favor de la intervención. Certeza de la evidencia baja.

### Puntos de Buena Práctica

El panel sugiere evitar el uso continuo y prolongado de medicamentos opioides y racionalizar su uso.

El panel sugiere iniciar analgésicos tipo acetaminofén antes de iniciar medicamentos opioides.

### Justificación

Los pacientes con Espondiloartritis axial con contraindicación y/o intolerancia al uso de AINES o quienes presenten enfermedad avanzada con daño estructural importante, o comorbilidades asociadas principalmente reumatismo de partes blandas, pueden beneficiarse del uso de acetaminofén y/o opioides, pero ya la indicación estaría dada por la entidad nosológica secundaria y no por el proceso inflamatorio primario.

### Consideraciones por subgrupos

Intervención para estos subgrupos:

Contraindicación y/o intolerancia a AINES

Control de dolor en pacientes con enfermedad avanzada y daño estructural

Dolor residual en pacientes con AINEs y/o terapia biológica

Reumatismo de partes blandas asociado

### Consideraciones de implementación

Intervención viable e implementable por disponibilidad de tecnología sanitaria en el país y costo accesible

Verificación de que esta intervención se utilice en nuestro medio en individuos con los aspectos ya definidos:

Contraindicación y/o intolerancia a AINES

Control de dolor en pacientes con enfermedad avanzada y daño estructural

Dolor residual en pacientes con AINES y/o terapia biológica

Reumatismo de partes blandas asociado

Monitoreo y evaluación de cumplimiento

Verificación historia clínica y formato MIPRES ya que la intervención si bien está disponible en nuestro país no está dentro del PBS

Prioridades de investigación futura

Ninguna

## TABLAS GRADE

Con la evidencia disponible, no fue posible elaborar las tablas GRADE

## Referencias

1. Van der Heijde D, Ramiro S, Landewé R, Baraliakos X, van den Bosch F, Sepriano A, et al. 2016 update of the ASAS-EULAR management recommendations for axial spondyloarthritis. *Annals of the Rheumatic Diseases* [Internet]. 2017 Jun;76(6):978–91. Available from: <http://ard.bmj.com/lookup/doi/10.1136/annrheumdis-2016-210770>
2. Ward MM, Deodhar A, Gensler LS, Dubreuil M, Yu D, Khan MA, et al. 2019 Update of the American College of Rheumatology/Spondylitis Association of America/Spondyloarthritis Research and Treatment Network Recommendations for the Treatment of Ankylosing Spondylitis and Nonradiographic Axial Spondyloarthritis. *Arthritis & Rheumatology* [Internet]. 2019 Oct 22;71(10):1599–613. Available from: <https://onlinelibrary.wiley.com/doi/abs/10.1002/art.41042>
3. Chang J-K, Yu C-T, Lee M-Y, Yeo K, Chang I-C, Tsou H-K, et al. Tramadol/acetaminophen combination as add-on therapy in the treatment of patients with ankylosing spondylitis. *Clinical Rheumatology* [Internet]. 2013 Mar 29;32(3):341–7. Available from: <http://link.springer.com/10.1007/s10067-012-2125-y>
4. Chang J-K, Yu C-T, Lee M-Y, Yeo K, Chang I-C, Tsou H-K, et al. Tramadol/acetaminophen combination as add-on therapy in the treatment of patients with ankylosing spondylitis. *Clinical Rheumatology* [Internet]. 2013 Mar 29;32(3):341–7. Available from: <http://link.springer.com/10.1007/s10067-012-2125-y>
5. Dau JD, Lee M, Ward MM, Gensler LS, Brown MA, Leach TJ, et al. Opioid Analgesic Use in Patients with Ankylosing Spondylitis: An Analysis of the Prospective Study of Outcomes in an Ankylosing Spondylitis Cohort. *The Journal of Rheumatology* [Internet]. 2018 Feb;45(2):188–94. Available from: <http://www.jrheum.org/lookup/doi/10.3899/jrheum.170630>
6. Sloan VS, Sheahan A, Stark JL, Suruki RY. Opioid Use in Patients with Ankylosing Spondylitis Is Common in the United States: Outcomes of a Retrospective Cohort Study. *The Journal of Rheumatology* [Internet]. 2019 Nov;46(11):1450–7. Available from: <http://www.jrheum.org/lookup/doi/10.3899/jrheum.180972>
7. Regel A, Sepriano A, Baraliakos X, van der Heijde D, Braun J, Landewé R, et al. Efficacy and safety of non-pharmacological and non-biological pharmacological treatment: a systematic literature review informing the 2016 update of the ASAS/EULAR recommendations for the management of axial spondyloarthritis. *RMD Open* [Internet]. 2017 Jan 27;3(1):e000397. Available from: <http://rmdopen.bmj.com/lookup/doi/10.1136/rmdopen-2016-000397>
8. Ramiro S, Radner H, Van Der Heijde Dm, Buchbinder R, Aletaha D, Landewe Rb. Combination Therapy for Pain Management in Inflammatory Arthritis: A Cochrane Systematic Review. *The Journal of Rheumatology Supplement* [Internet]. 2012 Sep 1;90(0):47–55. Available from: <http://www.jrheum.org/cgi/doi/10.3899/jrheum.120342>

## Pregunta 6:

¿En pacientes adultos con Espondiloartritis Periférica son eficaces (control enfermedad, remisión/baja actividad de síntomas, mejoría de escalas de funcionalidad y calidad de vida, progresión radiográfica) y seguros (eventos adversos) los Glucocorticoides (locales o sistémicos)?

|                     |                                                                                                                                                                            |
|---------------------|----------------------------------------------------------------------------------------------------------------------------------------------------------------------------|
| <b>Población</b>    | Pacientes adultos con espondiloartritis axial                                                                                                                              |
| <b>Intervención</b> | Medicamentos glucocorticoides locales o sistémicos                                                                                                                         |
| <b>Comparación</b>  | No usarlo                                                                                                                                                                  |
| <b>Desenlaces</b>   | Control de enfermedad /remisión/baja actividad de síntomas<br>Mejoría de escalas de funcionalidad, calidad de vida, progresión radiográfica y seguridad (eventos adversos) |

### Antecedentes

Las espondiloartritis (EspA), tradicionalmente denominadas espondiloartropatías, son un grupo de enfermedades reumáticas interrelacionadas que comparten características clínicas,

patogénicas, genéticas, radiográficas, epidemiológicas y de respuesta terapéutica. Dentro de

este grupo, además de otras, se incluyen en la actualidad la espondiloartritis axial (EspAax) y la artritis psoriásica (APs). Al mismo tiempo, dentro de la EspAax, actualmente se engloban dos subgrupos: la espondilitis anquilosante (EA) y la EspAax no radiográfica (EspAax-nr).

La EspAax se caracteriza por la afectación de las articulaciones sacroilíacas y la columna

vertebral. Tradicionalmente el diagnóstico se basaba en los criterios de clasificación modificados de New York de 1984 para EA (1). Estos criterios requieren la presencia de un cierto grado de daño estructural crónico, no reversible a nivel de las articulaciones sacroilíacas, detectable en la radiografía simple, lo cual suponía un retraso diagnóstico importante. Por ello, en 2009 aparecieron los criterios de clasificación Assessment of SpondyloArthritis international Society (ASAS) para EspAax (2), que incorporan la resonancia magnética (RMN) de sacroilíacas, la cual permite la detección precoz de alteraciones agudas a nivel de las articulaciones sacroilíacas (3), sin necesidad de que se haya producido aún ese cierto grado de daño estructural radiográfico.

En base a los criterios ASAS de EspAax hoy día diferenciamos dos subgrupos de pacientes con

EspAax: 1) pacientes con EA, que ya tienen un cierto grado de daño estructural visible en la radiografía simple, y 2) pacientes con EspAax-nr que representan una forma precoz o menos grave de la enfermedad. En esta Guía se irán alternando las respuestas relacionadas con preguntas clínicas para EA o EspAax y para EspAax-nr.

La APs es una enfermedad inflamatoria crónica del sistema musculoesquelético, generalmente asociada a psoriasis, que puede afectar a las articulaciones periféricas, las del esqueleto axial (columna vertebral y sacroilíacas), las entesis (sitios de inserción de ligamentos al hueso), vainas tendinosas (dactilitis), piel, uñas y otros órganos (intestino, ojo). Su heterogeneidad clínica y la ausencia de criterios de clasificación hasta hace unos años, ha dificultado la realización de estudios epidemiológicos y ensayos clínicos específicos. Sus variadas formas de presentación y de manifestaciones tanto musculoesqueléticas como cutáneas hacen que su manejo sea más complejo y necesite la colaboración de varios especialistas, fundamentalmente reumatólogos y dermatólogos (4, 5).

## Evidencia

Se seleccionó una revisión sistemática de la literatura (RSL) (Ward 2015) que contesta esta pregunta. (6).

En esta revisión sistemática, el tratamiento con glucocorticoides sistémicos se examinó en 3 series de casos y en un experimento clínico aleatorizado controlado con placebo de corta duración (2 semanas) con alta dosis de glucocorticoides (6) *vea el suplemento E*. En el experimento clínico, solo 2 de 10 desenlaces favorecieron a la prednisona a dosis de 20 mg sobre el placebo; 5 de 10 favorecieron a la prednisona a dosis de 50 mg sobre el placebo. Para las series de casos, fueron muy modestas las diferencias atribuibles a los glucocorticoides intravenosos sistémicos con tratamientos de 4 a 6 meses y los estudios mostraron un alto riesgo de sesgo y un estimativo impreciso del efecto. Por lo tanto, la calidad de la evidencia fue catalogada como muy baja. Se concluyó que hay muy baja evidencia que soporte el tratamiento de largo plazo con glucocorticoides sistémicos. Sin embargo, se reconoció que el tratamiento de corto plazo con glucocorticoides con disminución rápida de la dosis podría ser considerado en un limitado número de circunstancias, incluyendo brotes poliarticulares de artritis periférica, brotes durante el embarazo, o concomitantemente en presencia de brotes de enfermedad inflamatoria intestinal. Por lo anterior esta revisión sistemática generó una recomendación fuertemente en contra de administrar glucocorticoides sistémicos en pacientes adultos con EA.

En adultos con EA y sacroileitis activa aislada a pesar del tratamiento con AINES, se recomienda “condicionalmente” el tratamiento con glucocorticoides locales administrados parenteralmente sobre no tratamiento con glucocorticoides locales. (muy baja calidad de la evidencia). La recomendación se soporta en dos pequeños estudios clínicos de pobre calidad. Los estudios clínicos utilizaron desenlaces no estandarizados y uno fue no ciego. También se soporta en dos estudios observacionales (n=34 en total) con 18 meses de seguimiento que consistentemente mostraron mejoría de 40 mm en una escala de dolor de 0 – 100 mm hasta por 9 meses. Tres estudios observacionales adicionales incluyeron 51 pacientes con espondiloartritis anquilosante y 44 pacientes con espondiloartritis indiferenciada. Los resultados fueron muy similares a los de los estudios clínicos. (no se proporcionan las referencias) (6) *vea el suplemento E*. Sin embargo, los estudios tuvieron un serio riesgo de sesgo.

Dentro de la revisión sistemática, la búsqueda no identificó estudios de inyecciones locales de glucocorticoides para el tratamiento de la entesis en pacientes con EA. La recomendación dada (“en pacientes adultos con EA y enfermedad axial estable y entesis activa a pesar del tratamiento con AINES, se recomienda condicionalmente el tratamiento local con glucocorticoides administrados



parenteralmente sobre no tratamiento con glucocorticoides locales"- muy baja calidad de la evidencia) se basa en extrapolación de experiencias en otras enfermedades, en las cuales se evidenció modesto beneficio de corto plazo de las inyecciones peri-tendoneales y dependiendo del sitio. (7). Se recomienda en contra de inyecciones locales alrededor del tendón de Aquiles, patelar y del cuádriceps dado el alto riesgo de ruptura. (8). Inyecciones en otros sitios, tales como el gran trocánter, borde pélvico, y la fijación de la fascia plantar, podría ser considerado teniendo en cuenta la severidad de los síntomas y las preferencias del paciente entre tratamiento local y sistémico.

Tampoco hay estudios que reporten el uso de inyecciones intraarticulares de glucocorticoides para el tratamiento de la artritis periférica activa en la EA. La recomendación se elaboró basados en la evidencia de otras enfermedades reumáticas (9). Esta opción podría ser considerada para pacientes que prefieran el tratamiento local sobre el sistémico, y cuando solo 1 o 2 articulaciones están inflamadas. ("en pacientes adultos con EA y enfermedad axial estable y artritis periférica activa a pesar del tratamiento con AINES, se recomienda condicionalmente el tratamiento local con glucocorticoides administrados parenteralmente sobre no tratamiento con glucocorticoides locales"- muy baja calidad de la evidencia)

Esta RSL se considera la mejor evidencia disponible teniendo en cuenta que los estudios contenidos en esta revisión son los que contemplan la mayoría de las guías basadas en la evidencia (ver apéndice 1).

#### Glucocorticoides sistémicos vs No glucocorticoides

##### *Control de enfermedad /remisión/baja actividad de síntomas, mejoría de las escalas de funcionalidad*

Un total de 4 estudios (n= 56 en total), 3 series de casos y en un experimento clínico aleatorizado controlado (ECA) fueron incluidos en esta revisión.

El ECA fue un estudio doble ciego, controlado con placebo en pacientes con Espondiloartritis anquilosante. El desenlace principal se definió como 50% de mejoría del BASDAI a la semana 2. Este desenlace fue alcanzado por el 33% y el 27% de los pacientes tratados con 50 y 20 mg de prednisolona respectivamente vs 8% de los pacientes que recibieron el placebo ( $p=0.16$  y  $p=0.30$ ). La mejoría promedio del puntaje BASDAI fue significativamente mayor en el grupo de 50 mg comparado con el placebo. ( $2.39\pm0.5$  vs  $0.66\pm0.49$ ,  $p=0.03$ ), mientras que el cambio en el grupo de 20 mg fue pequeño ( $1.19\pm0.53$ ;  $p=0.41$ ). Los resultados para los otros desenlaces fueron similares. La evidencia para este desenlace es de muy baja calidad, por serio riesgo de sesgo, imprecisión de los resultados)

##### *Seguridad (eventos adversos)*

En el ECA se observó bajo número de eventos adversos en los grupos de prednisolona 20 mg (4 de 11 pacientes, 36%) y 50 mg (5 de 12 pacientes, 42%) vs el grupo placebo (6 de 13 pacientes, 46%). Sin embargo, no hay duda de que el uso de glucocorticoides (GC), especialmente en dosis altas y por periodos de tiempo continuos, pueden causar una morbilidad devastadora en los pacientes, ya que las toxicidades están típicamente asociadas con uso crónico de GC.

Se ha reportado que los eventos adversos graves asociados a GC ocurren con frecuencia de forma dependiente de la dosis (10). Debido a la pérdida ósea que conduce a osteoporosis. se informan fracturas en hasta el 50% de los pacientes que usan glucocorticoides crónicamente (6) (7). Los efectos

de GC sobre los queratinocitos y fibroblastos, llevan a efectos catabólicos en la piel durante el tratamiento con GC sistémicos, e incluyen atrofia cutánea. La disminución de la integridad estructural vascular es probablemente un determinante clave de la púrpura y de la fácil formación de hematomas (11)

Se identificó un artículo recientemente publicado (12) que reporta los datos del Registro brasileño para el monitoreo de productos biológicos, sobre la incidencia de eventos adversos infecciosos en pacientes con artritis reumatoide o espondiloartritis. Este registro incluyó un total de 1698 sujetos de los cuales 577 (35%) tenían diagnóstico de EspA, los pacientes fueron seguidos en promedio por 2.8 años (SD 2.2). Este estudio muestra que entre los pacientes con EspA que reciben corticoides sólo se reportó infección urinaria como evento adverso infeccioso, con una tasa menor que la observada con los medicamentos biológicos como TNF alfa (33/1000 pacientes-año IC95% 12 a 87) (12).

La asociación entre la aparición de un evento adverso y el uso de glucocorticoides a menudo se confunde con el uso concurrente de otros medicamentos tales como medicamentos antirreumáticos modificadores de la enfermedad (DIMARDS) y medicamentos antiinflamatorios no esteroideos (AINE). Sin embargo, es muy importante considerar las consecuencias de los eventos adversos que pueden atribuirse al uso de glucocorticoides, ya que estos agentes representan una opción terapéutica asequible que a menudo se agrega a otros regímenes.

El estudio de Huscher 2009 (13) identificó patrones de problemas de salud auto reportados relacionados con la dosis y la duración de la toma de los glucocorticoides en pacientes no seleccionados con artritis reumatoidea. La frecuencia de problemas de salud auto reportados fue más baja en el grupo sin glucocorticoides y se incrementó con la dosis. Las asociaciones encontradas están de acuerdo con el mecanismo biológico y con las observaciones clínicas.

Glucocorticoides locales vs No glucocorticoides

*Control de enfermedad/remisión/baja actividad de síntomas y mejoría de escalas de funcionalidad*

Un total de 4 estudios (n= 68 en total), 2 observacionales y 2 experimentos clínicos de corta duración y de muy baja calidad, fueron incluidos en esta revisión

En el estudio clínico más significativo (Luukkainen R) (14), diez pacientes con sacroileitis fueron tratados con 1.5 ml (40 mg/ml) de acetato de metilprednisolona y 1.5 ml (20 mg/ml) de lidocaína (Grupo MP), mientras 10 pacientes recibieron 1.5 ml de cloruro de sodio isotónico y 1.5 ml (20 mg/ml) lidocaína (Grupo control). A los dos meses de seguimiento, se evaluó el VAS ( $p=0,02$ ) y el índice de dolor ( $p=0,01$ ) habían mejorado en el grupo de intervención comparado con el grupo de placebo.

*Seguridad (eventos adversos)*

En estos estudios no hay mención a eventos adversos.

Preferencia de pacientes

Se realizó una búsqueda específica para identificar estudios de preferencias de pacientes. No se identificaron estudios de preferencias o calidad de vida específicos en pacientes con EspA que reciben glucocorticoides.

Estudios observacionales de efectos adversos graves de GC (EA) identifican fracturas y toxicidad ocular como una de las más prevalentes. Sin embargo, los pacientes a menudo se preocupan más por los efectos menos graves, aunque más aparentes. Secuelas como facies cushinoides, adelgazamiento de la piel, y equimosis muestran un impacto importante en su calidad de vida. (11)

Como evidencia indirecta se identificó un estudio conducido por Robson en 2018 sobre las percepciones de los pacientes tratados con glucocorticoides por vasculitis asociada a anticuerpos citoplasmáticos (15). Este estudio incluyó 50 pacientes reclutados de tres centros de reumatología del Reino Unido, Estados Unidos y Canadá. Los pacientes fueron seleccionados intencionalmente con el fin de incluir las enfermedades reumáticas de interés; entre los criterios de selección se tuvieron en cuenta la cronicidad de la enfermedad (diagnóstico <2 años antes de la inscripción o > 2 años), edad y sexo, y afectación de órganos. Las entrevistas fueron realizadas por investigadores con experiencia en investigación cualitativa. Las entrevistas continuaron hasta que se obtuvo "saturación de datos" y para satisfacer el marco de muestreo. Del total de entrevistas surgieron cuarenta temas individuales relacionados con la terapia con glucocorticoides, estos fueron agrupados en 13 categorías y tres temas generales: a) Los glucocorticoides son efectivos y la abstinencia puede potenciar una tarifa de AAV, b) saliente emocional, física y social efectos de la terapia con glucocorticoides y c) equilibrar los pros y contras de los glucocorticoides.

Como resultados globales de este estudio se destacan: Los pacientes valoran el beneficio que obtienen en el control de la enfermedad con el tratamiento con corticoides, sin embargo, muestran gran preocupación por el tiempo en que podrán permanecer recibiendo este tratamiento en forma segura ya que son conscientes de los riesgos del tratamiento a largo plazo. Entre las manifestaciones que los pacientes relacionan con el uso de corticoides se identificaron: niveles anormales de energía que afecta sus patrones de sueño (menos tiempo de sueño); depresión, ansiedad e irritabilidad; sensación de hambre y aumento del apetito que resulta en cambio en la apariencia y aumento de peso con glucocorticoides, fragilidad de la piel: sangrado fácil y debilidad muscular particularmente falta de fuerza en la piernas y brazos. Otros eventos adversos físicos informados incluyeron un nuevo inicio o empeoramiento de la diabetes mellitus. Entre las principales preocupaciones de los pacientes, está el tener que suspender los GC y que su enfermedad progrese o deje de estar controlada.

A pesar de que los autores muestran que el balance entre la efectividad del tratamiento y la preocupación por los efectos adversos a lo largo del tiempo, muestra en general un equilibrio, el estudio deja claro que el tratamiento con glucocorticoides impacta en forma importante la calidad de vida de quienes los reciben. Para los pacientes, el aumento de peso significativo y el cambio en la apariencia, lleva a una pérdida de sentido de sí mismo, cambios negativos en el comportamiento de las personas que los rodean y luego un estado de ánimo bajo. La irritabilidad e ira secundarias a los glucocorticoides también se destacaron como reacciones que impactan su calidad de vida respecto a las relaciones con familiares y compañeros de trabajo. La fatiga es otro aspecto importante del deterioro en la calidad de vida, ya que se asocia con una serie de factores biopsicológicos, incluidos los trastornos del sueño, fue claro el enlace entre altas dosis de glucocorticoides e insomnio. No se encontró una diferencia general en la calidad de vida entre los cónyuges de aquellos llama la atención que, en este estudio, otros factores potenciales, por ejemplo, infección o enfermedad cardiovascular no se informaron, posiblemente porque no fueron experimentados por los pacientes dentro la muestra, o los pacientes no atribuyeron estas complicaciones a los glucocorticoides. es uno de los aspectos que requieren más atención por parte de los médicos tratantes.

## Recursos requeridos

La búsqueda específica de análisis económicos en pacientes con EspA y uso de glucocorticoides, no arrojó ningún estudio que respondiera esta pregunta. Se conoce que los costos de atención médica asociados con los glucocorticoides incluyen tanto los debidos al precio de compra como los derivados de sus posibles eventos adversos. Por lo tanto, a pesar del bajo precio de los glucocorticoides en comparación con otras terapias para EspA, los costos iatrogénicos podrían ser un componente significativo del costo total del tratamiento con estos medicamentos.

Se identificó un análisis económico (16) sobre el costo de los eventos adversos asociados a los glucocorticoides que se considera evidencia indirecta para esta pregunta por ser desarrollado en una cohorte hipotética de pacientes con artritis reumatoidea. Sin embargo, aporta información sobre el impacto económico de eventos adversos a la terapia con GC que pueden ser extrapolables a EspA. Los autores desarrollaron un modelo analítico de decisión que comparó los costos de atención médica en usuarios y no usuarios de glucocorticoides. En el modelo de Markov, los pacientes comenzaron en el estado sin eventos adversos (NOEA) y en cada ciclo podrían pasar al estado de hipertensión (HTA), al estado de diabetes (DM), al estado de fractura (FRAC) o al estado de muerte (MUERTE). En cualquiera de los estados de salud, los pacientes también podrían adquirir una complicación gastrointestinal, una catarata, una infección grave como neumonía e infección del tracto urinario, un infarto de miocardio o un accidente cerebrovascular; estos eventos duraron solo un ciclo. Los pacientes también podrían transición al estado de MUERTE después de un IM, un derrame cerebral, una fractura de cadera o una complicación gastrointestinal. Los resultados se reportan en dólares americanos a valor de 2009. Dada la poca transferibilidad de los valores obtenidos respecto a los costos percé entre países (diferentes jurisdicciones) y cambios en el valor monetario a través del tiempo, aquí se destacan los resultados de este análisis que pueden aportar información relevante para la toma de decisiones respecto al potencial impacto económico de la terapia en presencia de eventos adversos serios.

Los eventos adversos que tuvieron un mayor impacto en los costos fueron complicaciones gastrointestinales y neumonía. En el modelo sin IM y accidente cerebrovascular, la diferencia en los costos entre usuarios de GC y no usuarios, fue menor cuando no se consideraron las complicaciones gastrointestinales, mientras que en el modelo con estos eventos cardiovasculares la diferencia fue menor cuando no se incluyó el IM. En comparación con la línea de base, excluir la neumonía redujo a la mitad el número de muertes entre los usuarios de GC en ambos modelos con y sin IM y accidente cerebrovascular. El impacto de la hipertensión y la diabetes fue modesto en los costos, y no tuvo ningún efecto sobre la cantidad de muertes a pesar de que las personas tenían mayores riesgos de infarto de miocardio y accidente cerebrovascular cuando estaban en estos estados crónicos. Los costos totales de usuarios y no usuarios de GC, así como la diferencia en estos costos, aumentaron casi linealmente con aumentos en los costos unitarios de atención médica. Si el modelo se ejecuta durante 10 años en lugar de 2 años, los costos de los usuarios de GC sería mayores que los que no son usuarios, alrededor de 5.9 y 5.1 veces los mismos costos para el período de 2 años. La diferencia en los costos fue de alrededor del 50% y 67% más bajo que en el caso donde ocurrieron los eventos adversos gastrointestinales al comienzo del período en el modelo sin y con MI y accidente cerebrovascular, respectivamente.

## DE LA EVIDENCIA A LAS DECISIONES

| PREGUNTA               |                                                                                                                                   |
|------------------------|-----------------------------------------------------------------------------------------------------------------------------------|
| POBLACION              | Pacientes adultos con espondiloartritis axial                                                                                     |
| INTERVENCIÓN           | <i>Glucocorticoides sistémicos y locales</i>                                                                                      |
| COMPARACIÓN            | <i>Placebo</i>                                                                                                                    |
| DESENLACES PRINCIPALES | Control de enfermedad /remisión/baja actividad de síntomas<br>Mejoría de escalas de funcionalidad<br>Seguridad (eventos adversos) |
| ÁMBITO                 | Ambulatorio y hospitalario                                                                                                        |
| PERSPECTIVA            | Del grupo desarrollador de la Guía                                                                                                |
| CONFLICTO DE INTERÉS:  | No hay ninguna declaración de conflictos de interés                                                                               |

## Evaluación

| <b>Problema</b><br>Es el problema una prioridad?                                                                                                                                                                               |                                                                                                                                                                                                                                                                                                                                                                                                                                                                                                                                                                                                                                                                                                                                                                                                                                                                                                                                                                                                                                                                                                                                                                                                                                                                                                                                                                                                                                                                                                                                                                                                                                                                                                                                                            |                                                                                                                                                                                                                                                                                                                                                                               |
|--------------------------------------------------------------------------------------------------------------------------------------------------------------------------------------------------------------------------------|------------------------------------------------------------------------------------------------------------------------------------------------------------------------------------------------------------------------------------------------------------------------------------------------------------------------------------------------------------------------------------------------------------------------------------------------------------------------------------------------------------------------------------------------------------------------------------------------------------------------------------------------------------------------------------------------------------------------------------------------------------------------------------------------------------------------------------------------------------------------------------------------------------------------------------------------------------------------------------------------------------------------------------------------------------------------------------------------------------------------------------------------------------------------------------------------------------------------------------------------------------------------------------------------------------------------------------------------------------------------------------------------------------------------------------------------------------------------------------------------------------------------------------------------------------------------------------------------------------------------------------------------------------------------------------------------------------------------------------------------------------|-------------------------------------------------------------------------------------------------------------------------------------------------------------------------------------------------------------------------------------------------------------------------------------------------------------------------------------------------------------------------------|
| JUICIO                                                                                                                                                                                                                         | EVIDENCIA DE LA INVESTIGACION                                                                                                                                                                                                                                                                                                                                                                                                                                                                                                                                                                                                                                                                                                                                                                                                                                                                                                                                                                                                                                                                                                                                                                                                                                                                                                                                                                                                                                                                                                                                                                                                                                                                                                                              | CONSIDERACIONES ADICIONALES                                                                                                                                                                                                                                                                                                                                                   |
| <input type="radio"/> No<br><input type="radio"/> Probablemente No<br><input type="radio"/> Probablemente Si<br><input checked="" type="radio"/> Si<br><input type="radio"/> Es variable<br><input type="radio"/> No se conoce | <p>La Espondiloartritis Axial es una enfermedad inflamatoria y crónica que afecta principalmente el esqueleto axial, columna vertebral y articulaciones sacroilíacas, así como otras articulaciones periféricas de predominio en miembros inferiores (caderas, rodillas y tobillos). Puede generar un gran impacto funcional asociado a discapacidad, con deterioro significativo de la funcionalidad y calidad de vida de los pacientes con esta enfermedad.</p> <p>Khan MA (2002) Update on spondyloarthropathies. (17).</p> <p>En ausencia de un diagnóstico temprano y un tratamiento oportuno, la carga de la enfermedad puede generar un impacto funcional asociado a discapacidad, pérdida laboral, con secuelas no solo funcionales de tipo articular sino psicológicas, llevando a un deterioro en la calidad de vida.</p> <p>La incidencia y prevalencia es universal, varía en función de las características demográficas de la población y relacionada con la frecuencia el antígeno HLA-B27. La prevalencia de Espondiloartritis Axial se estima entre el 0,20% y el 1.61% de la población con una incidencia alrededor de los 0,84 a los 77 casos por cada 100.000 habitantes/año. (18).</p> <p>En Colombia se documentó una prevalencia de 0.17 % en un estudio poblacional reciente, en el que se analizaron datos demográficos de todos los pacientes atendidos con este código diagnóstico, registrados en el Sistema de Información de la Protección Social (SISPRO) del Ministerio de Salud de Colombia. (19). Prevalencia de la enfermedad reumática en Colombia, según estrategia COPCORD-Asociación Colombiana de Reumatología. Estudio de prevalencia de enfermedad reumática en población colombiana mayor de 18 años. (20).</p> | <p>Experto ASOREUMA: Considero que el problema SI es una prioridad, ya que, en ausencia de un diagnóstico temprano y un tratamiento oportuno, la carga de la enfermedad puede generar un impacto funcional asociado a discapacidad, pérdida laboral, con secuelas no solo funcionales de tipo articular sino psicológicas, llevando a un deterioro en la calidad de vida.</p> |

| Efectos deseables (beneficios de la opción a recomendar)                          |                                                           |                                            |                                 |                                                                                                                                                                                       |                                         |                                                                                                                                                                                                                                                    |                                                                                                                                        |
|-----------------------------------------------------------------------------------|-----------------------------------------------------------|--------------------------------------------|---------------------------------|---------------------------------------------------------------------------------------------------------------------------------------------------------------------------------------|-----------------------------------------|----------------------------------------------------------------------------------------------------------------------------------------------------------------------------------------------------------------------------------------------------|----------------------------------------------------------------------------------------------------------------------------------------|
| ¿Qué tan sustanciales son los efectos deseables de la opción?                     |                                                           |                                            |                                 |                                                                                                                                                                                       |                                         |                                                                                                                                                                                                                                                    |                                                                                                                                        |
| JUICIO                                                                            | EVIDENCIA DE LA INVESTIGACION                             |                                            |                                 |                                                                                                                                                                                       |                                         | CONSIDERACIONES ADICIONALES                                                                                                                                                                                                                        |                                                                                                                                        |
| ◦ Triviales<br>◦ Pequeños<br>◦ Moderados<br>◦ Grandes<br>◦ Varían<br>◦ No se sabe | Comparación de Glucocorticoide sistémico vs placebo       |                                            |                                 |                                                                                                                                                                                       |                                         | Comparación de Glucocorticoide local vs placebo<br><br>Al comienzo del estudio, el promedio del VAS y de índice de dolor fue mayor en el grupo que recibió la metilprednisolona, pero la diferencia fue solo significativa para el VAS (p = 0.02). |                                                                                                                                        |
|                                                                                   | Desenlaces                                                | Nº de participantes (estudios) Seguimiento | Certeza de la evidencia (GRADE) | Efecto relativo (95% IC)                                                                                                                                                              | Efecto absoluto anticipado (95% IC)     |                                                                                                                                                                                                                                                    |                                                                                                                                        |
|                                                                                   |                                                           |                                            |                                 |                                                                                                                                                                                       | Riesgo con placebo                      |                                                                                                                                                                                                                                                    | Diferencia de riesgos con Glucocorticoides                                                                                             |
|                                                                                   | BASDAI 50<br><br>Medido como 50% de mejoría a la semana 2 | 36<br><br>(1 ECA)                          | ⊕○○○<br>Muy baja                | El desenlace primario fue alcanzado por un 33% y un 27% de los pacientes tratados con 50 y 20 mg de prednisolona respectivamente vs solo un 8% del grupo placebo (p=0.16 and p=0.30). | puntuación promedio 0,66 (−0.34 a 1.66) |                                                                                                                                                                                                                                                    | puntuación promedio 2.39 (1.38 a 3.40) p=0.033 y 1.19 (0.12 a 2.27) p= 0.41 para los grupos de Prednisolona 50 y 20 mg respectivamente |
|                                                                                   | Comparación de Glucocorticoide local vs placebo           |                                            |                                 |                                                                                                                                                                                       |                                         |                                                                                                                                                                                                                                                    |                                                                                                                                        |

| Desenlaces                                                                                 | Nº de participantes (estudios)<br>Seguimiento | Certeza de la evidencia (GRADE) | Efecto relativo (95% IC) | Efecto absoluto anticipado (95% IC)                                                         |                                                                                                          |
|--------------------------------------------------------------------------------------------|-----------------------------------------------|---------------------------------|--------------------------|---------------------------------------------------------------------------------------------|----------------------------------------------------------------------------------------------------------|
|                                                                                            |                                               |                                 |                          | Riesgo con placebo                                                                          | Diferencia de riesgos con Glucocorticoides                                                               |
| Dolor con EVA (escala visual análoga)                                                      | 30 (2 ECAs)                                   | ⊕○○○<br>Muy baja                |                          | 1) Estudio (R. Luukkainen) (14)                                                             |                                                                                                          |
| Seguimiento a 2 meses<br>Estudio (R. Luukkainen) (14)                                      |                                               |                                 |                          | puntuación promedio de dolor<br>Basal: 38,5 (4 - 52)<br>2 meses: -1.5 (-47 - 38)            | puntuación promedio de dolor<br>Basal: 54.5 (22 - 88)<br>2 meses: -26.5 (-82 - 13) p=0,02                |
| Índice de dolor de la articulación sacroilíaca                                             | 30 (2 ECAs)                                   | ⊕○○○<br>Muy baja                |                          | 1) Estudio (R. Luukkainen) (14)                                                             | 1) Estudio (R. Luukkainen) (14)                                                                          |
| Seguimiento a 2 meses<br>Estudio (R. Luukkainen) (14) y 1 y 3 meses Estudio (Maugars) (21) |                                               |                                 |                          | puntuación promedio de dolor<br>Basal: 6 puntos (3 - 8)<br>2 meses: -1.4 (-4 -              | puntuación promedio de dolor<br>Basal: 7.5 (4 - 9)<br>2 meses: -4.5 (-7 - 0) p=0,01                      |
|                                                                                            |                                               |                                 |                          | 2) Estudio (Maugars) (21)<br>Dolorimetría variación<br>Basal: 7.0 ± 0.6<br>1 mes: 5.2 ± 0.5 | 2) Estudio (Maugars) (21)<br>Dolorimetría variación<br>Basal: 6.8 ± 0.6<br>1 mes: 1.3 ± 0.3 {P < 0.005}. |



| Efectos Indeseables                                                                                                                                                      |                                                                                                                                                                                                                                                                                                                                                                                                                                                                                                                                                                                                                                                                                                                       |                             |
|--------------------------------------------------------------------------------------------------------------------------------------------------------------------------|-----------------------------------------------------------------------------------------------------------------------------------------------------------------------------------------------------------------------------------------------------------------------------------------------------------------------------------------------------------------------------------------------------------------------------------------------------------------------------------------------------------------------------------------------------------------------------------------------------------------------------------------------------------------------------------------------------------------------|-----------------------------|
| ¿Qué tan sustanciales son los efectos indeseables que se pueden anticipar?                                                                                               |                                                                                                                                                                                                                                                                                                                                                                                                                                                                                                                                                                                                                                                                                                                       |                             |
| JUICIO                                                                                                                                                                   | EVIDENCIA DE LA INVESTIGACION                                                                                                                                                                                                                                                                                                                                                                                                                                                                                                                                                                                                                                                                                         | CONSIDERACIONES ADICIONALES |
| <ul style="list-style-type: none"> <li>o Triviales</li> <li><b>o Pequeños</b></li> <li>o Moderados</li> <li>o Grandes</li> <li>o Varían</li> <li>o No se sabe</li> </ul> | <p>Comparación de Glucocorticoide sistémico vs placebo:</p> <p>Los eventos adversos no fueron vistos con más frecuencia en el grupo de Prednisolona 20 mg (4 de 11 pacientes, 36%) y el grupo de Prednisolona 50 mg (5 de 12 pacientes, 42%) vs el grupo de placebo (6 de 13 pacientes, 46%).(22)</p> <p>Un estudio observacional concluyo que los eventos adversos durante el tratamiento de largo plazo con bajas dosis de glucocorticoides son limitados. Las bajas dosis de glucocorticoides no tienen un efecto adverso sobre la densidad mineral ósea, los lípidos, los niveles de glucosa y el índice de masa corporal.(23)</p> <p>Comparación de Glucocorticoide local vs placebo:</p> <p>No se mencionan</p> |                             |

| Certeza en la Evidencia                                                                                                                                                                       |                                                                                                                                                                                                                                                                                                                                                                                                                                                                                                                                                                                                                                                                                                                                                                                                                                                                                                                                                                   |                                 |                      |                                 |                                                            |         |                  |                                     |         |                  |                              |         |                  |                                                                                                                             |
|-----------------------------------------------------------------------------------------------------------------------------------------------------------------------------------------------|-------------------------------------------------------------------------------------------------------------------------------------------------------------------------------------------------------------------------------------------------------------------------------------------------------------------------------------------------------------------------------------------------------------------------------------------------------------------------------------------------------------------------------------------------------------------------------------------------------------------------------------------------------------------------------------------------------------------------------------------------------------------------------------------------------------------------------------------------------------------------------------------------------------------------------------------------------------------|---------------------------------|----------------------|---------------------------------|------------------------------------------------------------|---------|------------------|-------------------------------------|---------|------------------|------------------------------|---------|------------------|-----------------------------------------------------------------------------------------------------------------------------|
| ¿Cuál es la certeza en la evidencia global sobre los efectos de la opción a recomendar?                                                                                                       |                                                                                                                                                                                                                                                                                                                                                                                                                                                                                                                                                                                                                                                                                                                                                                                                                                                                                                                                                                   |                                 |                      |                                 |                                                            |         |                  |                                     |         |                  |                              |         |                  |                                                                                                                             |
| JUICIO                                                                                                                                                                                        | EVIDENCIA DE LA INVESTIGACION                                                                                                                                                                                                                                                                                                                                                                                                                                                                                                                                                                                                                                                                                                                                                                                                                                                                                                                                     | CONSIDERACIONES ADICIONALES     |                      |                                 |                                                            |         |                  |                                     |         |                  |                              |         |                  |                                                                                                                             |
| <input checked="" type="radio"/> Muy baja<br><input type="radio"/> Baja<br><input type="radio"/> Moderada<br><input type="radio"/> Alta<br><input type="radio"/> No se identificaron estudios | <p>Hay muy baja evidencia que soporte el tratamiento de largo plazo con glucocorticoides sistémicos. Sin embargo, se reconoce que el tratamiento de corto plazo con glucocorticoides con disminución rápida de la dosis podría ser considerado en un limitado número de circunstancias, incluyendo brotes poliarticulares de artritis periférica, brotes durante el embarazo, o concomitantemente en presencia de brotes de enfermedad inflamatoria intestinal</p> <table border="1"> <thead> <tr> <th>Desenlace</th> <th>Importancia Relativa</th> <th>Certeza de la evidencia (GRADE)</th> </tr> </thead> <tbody> <tr> <td>control de enfermedad /remisión/baja actividad de síntomas</td> <td>CRITICA</td> <td>⊕○○○<br/>Muy baja</td> </tr> <tr> <td>mejoría de escalas de funcionalidad</td> <td>CRITICA</td> <td>⊕○○○<br/>Muy baja</td> </tr> <tr> <td>seguridad (eventos adversos)</td> <td>CRITICA</td> <td>⊕○○○<br/>Muy baja</td> </tr> </tbody> </table> | Desenlace                       | Importancia Relativa | Certeza de la evidencia (GRADE) | control de enfermedad /remisión/baja actividad de síntomas | CRITICA | ⊕○○○<br>Muy baja | mejoría de escalas de funcionalidad | CRITICA | ⊕○○○<br>Muy baja | seguridad (eventos adversos) | CRITICA | ⊕○○○<br>Muy baja | <p>1. Los estudios que soportan la evidencia son de baja calidad con poblaciones pequeñas y con un alto riesgo de sesgo</p> |
| Desenlace                                                                                                                                                                                     | Importancia Relativa                                                                                                                                                                                                                                                                                                                                                                                                                                                                                                                                                                                                                                                                                                                                                                                                                                                                                                                                              | Certeza de la evidencia (GRADE) |                      |                                 |                                                            |         |                  |                                     |         |                  |                              |         |                  |                                                                                                                             |
| control de enfermedad /remisión/baja actividad de síntomas                                                                                                                                    | CRITICA                                                                                                                                                                                                                                                                                                                                                                                                                                                                                                                                                                                                                                                                                                                                                                                                                                                                                                                                                           | ⊕○○○<br>Muy baja                |                      |                                 |                                                            |         |                  |                                     |         |                  |                              |         |                  |                                                                                                                             |
| mejoría de escalas de funcionalidad                                                                                                                                                           | CRITICA                                                                                                                                                                                                                                                                                                                                                                                                                                                                                                                                                                                                                                                                                                                                                                                                                                                                                                                                                           | ⊕○○○<br>Muy baja                |                      |                                 |                                                            |         |                  |                                     |         |                  |                              |         |                  |                                                                                                                             |
| seguridad (eventos adversos)                                                                                                                                                                  | CRITICA                                                                                                                                                                                                                                                                                                                                                                                                                                                                                                                                                                                                                                                                                                                                                                                                                                                                                                                                                           | ⊕○○○<br>Muy baja                |                      |                                 |                                                            |         |                  |                                     |         |                  |                              |         |                  |                                                                                                                             |

| ¿Hay variación o poca certeza sobre cómo valoran las personas/los pacientes los desenlaces principales?                                                                                                                                                                                                               |                                                                                                                                                                                                                                                                                                                                                                                                                                                                                                                                                                                                                                                                                                                                                                                                                                                                                                                                                                                                                                                                                                                                                                                                                                 |                             |
|-----------------------------------------------------------------------------------------------------------------------------------------------------------------------------------------------------------------------------------------------------------------------------------------------------------------------|---------------------------------------------------------------------------------------------------------------------------------------------------------------------------------------------------------------------------------------------------------------------------------------------------------------------------------------------------------------------------------------------------------------------------------------------------------------------------------------------------------------------------------------------------------------------------------------------------------------------------------------------------------------------------------------------------------------------------------------------------------------------------------------------------------------------------------------------------------------------------------------------------------------------------------------------------------------------------------------------------------------------------------------------------------------------------------------------------------------------------------------------------------------------------------------------------------------------------------|-----------------------------|
| <ul style="list-style-type: none"> <li>o Variabilidad o incertidumbre importante</li> <li>o Posiblemente hay variabilidad o incertidumbre importante</li> <li>o Posiblemente No hay variabilidad o incertidumbre importante</li> <li>o No hay variabilidad o incertidumbre importante</li> </ul>                      | <p>De acuerdo con un estudio cualitativo adelantado por Robson y cols (15), entre pacientes de estados unidos, Canadá y el reino unido, el cual se basó en 50 entrevistas a pacientes que recibían glucocorticoides por enfermedades reumatoideas diferentes a la EspA, existen tres temas generales, que reportan los pacientes respecto a este tratamiento: 1. Los glucocorticoides son efectivos en el momento del diagnóstico y durante la recaída, y la abstinencia puede potenciar un brote o exacerbación de su enfermedad, 2. los glucocorticoides están asociados con importantes efectos emocionales, físicos y sociales (depresión, ansiedad, irritación, peso ganancia y cambio en la apariencia, diabetes mellitus, efecto en la familia y el trabajo); y 3. las percepciones de los pacientes de equilibrar los riesgos y beneficios de los glucocorticoides. Los pacientes identificaron los aspectos positivos del tratamiento con glucocorticoides; son de acción rápida y efectivas, pero expresaron su preocupación por los efectos adversos y la incertidumbre del proceso de reducción de dosis. Estos resultados hacen ver la necesidad de valorar cuidadosamente los regímenes con glucocorticoides.</p> |                             |
| Balance de los efectos                                                                                                                                                                                                                                                                                                |                                                                                                                                                                                                                                                                                                                                                                                                                                                                                                                                                                                                                                                                                                                                                                                                                                                                                                                                                                                                                                                                                                                                                                                                                                 |                             |
| ¿El balance entre los efectos deseables e indeseables favorece la opción o el comparador?                                                                                                                                                                                                                             |                                                                                                                                                                                                                                                                                                                                                                                                                                                                                                                                                                                                                                                                                                                                                                                                                                                                                                                                                                                                                                                                                                                                                                                                                                 |                             |
| JUICIO                                                                                                                                                                                                                                                                                                                | EVIDENCIA DE LA INVESTIGACION                                                                                                                                                                                                                                                                                                                                                                                                                                                                                                                                                                                                                                                                                                                                                                                                                                                                                                                                                                                                                                                                                                                                                                                                   | CONSIDERACIONES ADICIONALES |
| <ul style="list-style-type: none"> <li>o Favorece al comparador</li> <li>o Probablemente favorece al comparador</li> <li>o No favorece al comparador ni a la opción en evaluación</li> <li>o Probablemente favorece a la opción</li> <li>o Favorece la intervención</li> <li>o Varía</li> <li>o No se sabe</li> </ul> | <p>La baja calidad de los estudios acerca de la efectividad del tratamiento con GC en la EspA, la pequeña cantidad de pacientes y el alto riesgo de sesgos no permiten concluir en favor o en contra de la intervención. Sin embargo, la evidencia indirecta respecto al perfil de seguridad del uso de corticoides sistémicos, hace pensar que son mayores los riesgos que los beneficios.</p>                                                                                                                                                                                                                                                                                                                                                                                                                                                                                                                                                                                                                                                                                                                                                                                                                                 |                             |
| Recursos Requeridos y costos                                                                                                                                                                                                                                                                                          |                                                                                                                                                                                                                                                                                                                                                                                                                                                                                                                                                                                                                                                                                                                                                                                                                                                                                                                                                                                                                                                                                                                                                                                                                                 |                             |
| Que tanto es el requerimiento de recursos (costos)?                                                                                                                                                                                                                                                                   |                                                                                                                                                                                                                                                                                                                                                                                                                                                                                                                                                                                                                                                                                                                                                                                                                                                                                                                                                                                                                                                                                                                                                                                                                                 |                             |

| JUICIO                                                                                                                                                                                                                                                   | EVIDENCIA DE LA INVESTIGACION                                                                                                                                                                                                                                                                                                                                                                                                                                                                                                                                                                                                                                                                                                                                                                                                                                                                                                                                                                                                         | CONSIDERACIONES ADICIONALES |
|----------------------------------------------------------------------------------------------------------------------------------------------------------------------------------------------------------------------------------------------------------|---------------------------------------------------------------------------------------------------------------------------------------------------------------------------------------------------------------------------------------------------------------------------------------------------------------------------------------------------------------------------------------------------------------------------------------------------------------------------------------------------------------------------------------------------------------------------------------------------------------------------------------------------------------------------------------------------------------------------------------------------------------------------------------------------------------------------------------------------------------------------------------------------------------------------------------------------------------------------------------------------------------------------------------|-----------------------------|
| <ul style="list-style-type: none"> <li>o Grandes costos</li> <li>o Costos moderados</li> <li>o no significantes costos ni ahorros</li> <li>o Moderados ahorros</li> <li>o Grandes ahorros</li> <li>o Varían</li> <li>o No se sabe</li> </ul>             | <p>El costo de los GC es bajo, a pesar de que en algunos casos se requiere de dosis altas para lograr el control de la enfermedad. Sin embargo, la costo efectividad de la intervención con glucocorticoides en comparación con no recibirlos está determinada por la frecuencia de eventos adversos serios, que aumentan los costos de atención en forma considerable. Un estudio adelantado en pacientes con artritis reumatoidea mostró que los efectos gastrointestinales aumentan el costo de atención de los pacientes que reciben GC hasta 2,5 veces. También mostró que, ante la presencia de eventos adversos serios como infarto de miocardio y accidentes cerebrovasculares, el costo de atención por el uso de corticoides aumenta en forma considerable en comparación con no usarlos. Por lo que se debe realizar un balance entre el beneficio de la terapia y su duración, con el fin de reducir el impacto en los costos de atención por eventos adversos generalmente relacionados con su uso por largo tiempo.</p> |                             |
| <b>Equidad</b><br>¿La implementación de la opción, tendrá impacto en la equidad?                                                                                                                                                                         |                                                                                                                                                                                                                                                                                                                                                                                                                                                                                                                                                                                                                                                                                                                                                                                                                                                                                                                                                                                                                                       |                             |
| JUICIO                                                                                                                                                                                                                                                   | EVIDENCIA DE LA INVESTIGACION                                                                                                                                                                                                                                                                                                                                                                                                                                                                                                                                                                                                                                                                                                                                                                                                                                                                                                                                                                                                         | CONSIDERACIONES ADICIONALES |
| <ul style="list-style-type: none"> <li>o Reduce</li> <li>o Probablemente se reduce la equidad</li> <li>o Probablemente no impacta la equidad</li> <li>o Probablemente incrementa</li> <li>o Incrementa</li> <li>o Varia</li> <li>o No se sabe</li> </ul> | <p>No se encontró evidencia.</p>                                                                                                                                                                                                                                                                                                                                                                                                                                                                                                                                                                                                                                                                                                                                                                                                                                                                                                                                                                                                      |                             |
| <b>Aceptabilidad</b><br>¿Es la opción aceptada por los diferentes actores involucrados en su implementación?                                                                                                                                             |                                                                                                                                                                                                                                                                                                                                                                                                                                                                                                                                                                                                                                                                                                                                                                                                                                                                                                                                                                                                                                       |                             |

| JUICIO                                                                                                                                                                                                                 | EVIDENCIA DE LA INVESTIGACION                                                                                                                                                                                                                                                         | CONSIDERACIONES ADICIONALES |
|------------------------------------------------------------------------------------------------------------------------------------------------------------------------------------------------------------------------|---------------------------------------------------------------------------------------------------------------------------------------------------------------------------------------------------------------------------------------------------------------------------------------|-----------------------------|
| <input type="radio"/> No<br><input type="radio"/> Probablemente no<br><input type="radio"/> Probablemente si<br><input type="radio"/> Si<br><input type="radio"/> Varia<br><input checked="" type="radio"/> No se sabe | No se encontró evidencia                                                                                                                                                                                                                                                              |                             |
| <b>Factibilidad</b><br>¿Es la opción factible de IMPLEMENTAR?                                                                                                                                                          |                                                                                                                                                                                                                                                                                       |                             |
| JUICIO                                                                                                                                                                                                                 | EVIDENCIA DE LA INVESTIGACION                                                                                                                                                                                                                                                         | CONSIDERACIONES ADICIONALES |
| <input type="radio"/> No<br><input type="radio"/> Probablemente no<br><input type="radio"/> Probablemente si<br><input type="radio"/> Si<br><input type="radio"/> Varia<br><input checked="" type="radio"/> No se sabe | Al juzgar por la evidencia existente, la utilización de glucocorticoides sistémicos no tiene soporte sólido y parecería que los riesgos sobrepasan los beneficios, sin embargo, la utilización en algunos casos de glucocorticoides locales podría ser de utilidad para los pacientes |                             |

## Resumen de Juicios

|                         | JUICIOS                                 |                                                      |                                                          |                                            |                          |       |                     |
|-------------------------|-----------------------------------------|------------------------------------------------------|----------------------------------------------------------|--------------------------------------------|--------------------------|-------|---------------------|
| PROBLEMA                | No                                      | Probablemente no                                     | Probablemente si                                         | Si                                         |                          | Varia | No se sabe          |
| EFFECTOS DESEABLES      | Triviales                               | Pequeños                                             | Moderados                                                | Grandes                                    |                          | Varia | No se sabe          |
| EFFECTOS INDESEABLES    | Grandes                                 | Moderados                                            | Pequeños                                                 | Triviales                                  |                          | Varia | No se sabe          |
| CERTEZA EN LA EVIDENCIA | Muy Baja                                | Baja                                                 | Moderada                                                 | Alta                                       |                          |       | No incluyó estudios |
| VALORES DE PACIENTES    | Importante incertidumbre o variabilidad | Posiblemente Importante incertidumbre o variabilidad | Probablemente No Importante incertidumbre o variabilidad | No Importante incertidumbre o variabilidad |                          |       |                     |
| BALANCE DE LOS EFECTOS  | Favorece el comparador                  | Probablemente Favorece el comparador                 | No favorece Ni la intervención ni el comparador          | Probablemente favorece la intervención     | Favorece la intervención | Varia | No se sabe          |
| RECURSOS REQUERIDOS     | Grandes costos                          | Moderados costos                                     | Costos y ahorros insignificantes                         | Moderados ahorros                          | Grandes ahorros          | Varia | No se sabe          |
| EQUIDAD                 | Reducida                                | Probablemente reducida                               | Probablemente no impactada                               | Probablemente incrementada                 | Incrementada             | Varia | No se sabe          |
| ACEPTABILIDAD           | No                                      | Probablemente No                                     | Probablemente Si                                         | Si                                         |                          | Varia | No se sabe          |
| FACTIBILIDAD            | No                                      | Probablemente No                                     | Probablemente Si                                         | Si                                         |                          | Varia | No se sabe          |

Tipo de Recomendación- Glucocorticoides sistémicos

|                                                      |                                                           |                                                                                    |                                                         |                                                    |
|------------------------------------------------------|-----------------------------------------------------------|------------------------------------------------------------------------------------|---------------------------------------------------------|----------------------------------------------------|
| Recomendación fuerte en contra de la opción<br><br>○ | Recomendación condicional en contra de la opción<br><br>○ | Recomendación condicional a favor de cualquiera la opción o su comparador<br><br>○ | Recomendación condicional a favor de la opción<br><br>○ | Recomendación fuerte a favor de la opción<br><br>○ |
|------------------------------------------------------|-----------------------------------------------------------|------------------------------------------------------------------------------------|---------------------------------------------------------|----------------------------------------------------|

## Uso de glucocorticoides locales

|                                                      |                                                           |                                                                                    |                                                         |                                                    |
|------------------------------------------------------|-----------------------------------------------------------|------------------------------------------------------------------------------------|---------------------------------------------------------|----------------------------------------------------|
| Recomendación fuerte en contra de la opción<br><br>○ | Recomendación condicional en contra de la opción<br><br>○ | Recomendación condicional a favor de cualquiera la opción o su comparador<br><br>○ | Recomendación condicional a favor de la opción<br><br>○ | Recomendación fuerte a favor de la opción<br><br>○ |
|------------------------------------------------------|-----------------------------------------------------------|------------------------------------------------------------------------------------|---------------------------------------------------------|----------------------------------------------------|

## Conclusiones

### Recomendación

En pacientes con EspAax se recomienda no usar Glucocorticoides sistémicos ni locales. Recomendación fuerte en contra del tratamiento. Certeza de la evidencia muy baja

### Justificación

Reducir la variabilidad del enfoque terapéutico en EspAax, optimizar y racionalizar los costos de atención, acercar el manejo y el diagnóstico a estándares de óptima calidad, lograr diagnósticos oportunos y remisiones tempranas al reumatólogo.

### Consideraciones por subgrupos

No se identifican como necesarias.

#### Consideraciones de implementación

Socialización y difusión de la guía por los diferentes entes de salud y gubernamentales.

#### Monitoreo y evaluación de cumplimiento

Monitoreo a través del registro de medicamentos en la plataforma MIPRES

#### Prioridades de investigación futura

Diseñar y conducir ECAs que evalúen la eficacia y seguridad de los glucocorticoides locales y sistémicos en pacientes con EspAax



## APÉNDICES

### APÉNDICE 1. Recomendaciones de las Guías de Práctica Clínica

GPC CANADIENSE (24), Management of Spondyloarthritis. Part I: Principles of the Management of Research Consortium of Canada Treatment Recommendations for the 2014 Update of the Canadian Rheumatology Association/Spondyloarthritis.

Recomendación 8: “Considere la inyección de glucocorticoides en el sitio de la inflamación, incluyendo las articulaciones sacroilíacas, articulaciones periféricas y entesis. Experimentos clínicos controlados con placebo de inyecciones articulares guiadas por Rx mostraron significativa mejoría en el dolor con mínimos eventos adversos”. (25), (14), (21), (26), (27). Series de casos También soportan el uso de inyecciones intra-articulares (28), (29). El Nivel de la evidencia para inyecciones intra-articulares en las sacroilíacas fue I y la fuerza de la recomendación A, para otras articulaciones el nivel de evidencia fue IV y la fuerza de la recomendación D.

ASAS-EULAR (30) 2016 update of the ASAS-EULAR management recommendations for axial spondyloarthritis

Recomendación 7: “Las inyecciones de glucocorticoides dirigidas localmente al sitio de la inflamación pueden ser consideradas. Los pacientes con enfermedad axial no deberían recibir tratamiento de larga duración con glucocorticoides sistémicos”.

Esta recomendación combina, como en la versión previa, dos modos de uso de los glucocorticoides: local y sistémico. La recomendación acerca del uso de inyecciones locales no ha cambiado indicando que son una buena opción para tratar artritis y entesis, aunque falta evidencia directa. La recomendación acerca del uso de glucocorticoides sistémicos ha cambiado ligeramente. Nuevos datos sugieren que tratamientos cortos con altas dosis de glucocorticoides (50 mg/día) podrían tener un muy modesto efecto sobre los signos y síntomas de los pacientes con espondiloartritis axial. (22). A pesar de esto, el panel aún considera que los pacientes con espondiloartritis axial no deberían ser tratados por largo tiempo con glucocorticoides independientemente de la dosis.

USA (31) Update of the American College of Rheumatology/ Spondylitis Association of America/Spondyloarthritis.

#### *Espondiloartritis Anquilosante Activa:*

Recomendación 16: “Se recomienda fuertemente en contra del tratamiento con glucocorticoides sistémicos (nivel de evidencia muy bajo)”

Recomendación 17: “En adultos con sacroileítis aislada activa a pesar del tratamiento con AINES, se recomienda condicionalmente el tratamiento con glucocorticoides parenterales administrados localmente sobre no tratamiento con glucocorticoides locales. (nivel de evidencia muy bajo)”

Recomendación 18: “En adultos con enfermedad axial estable y entesis activa a pesar del tratamiento con AINES se recomienda condicionalmente el tratamiento con glucocorticoides parenterales administrados localmente sobre no tratamiento con glucocorticoides locales. Deben evitarse las inyecciones junto al tendón de Aquiles, patelar y cuádriceps (nivel de evidencia muy bajo)”

Recomendación 19: “En adultos con enfermedad axial estable y artritis periférica a pesar del tratamiento con AINES, se recomienda condicionalmente el tratamiento con glucocorticoides parenterales administrados localmente sobre no tratamiento con glucocorticoides locales. (nivel de evidencia muy bajo)”

#### *Espondiloartritis Axial no radiográfica activa:*

Recomendación 67: “Se recomienda fuertemente en contra del tratamiento con glucocorticoides sistémicos (nivel de evidencia muy bajo)”

Recomendación 68: “En adultos con sacroileítis aislada activa a pesar del tratamiento con AINES, se recomienda condicionalmente el tratamiento con glucocorticoides parenterales administrados localmente sobre no tratamiento con glucocorticoides locales. (nivel de evidencia muy bajo)”

Recomendación 69: “En adultos con enfermedad axial estable y entesis activa a pesar del tratamiento con AINES se recomienda condicionalmente el tratamiento con glucocorticoides parenterales administrados localmente sobre no tratamiento con glucocorticoides locales. Deben evitarse las inyecciones junto al tendón de Aquiles, patelar y cuádriceps (nivel de evidencia muy bajo)”

Recomendación 70: “En adultos con enfermedad axial estable y artritis periférica a pesar del tratamiento con AINES, se recomienda condicionalmente el tratamiento con glucocorticoides parenterales administrados localmente sobre no tratamiento con glucocorticoides locales. (nivel de evidencia muy bajo)”

FRANCESA (32) 2018 update of French Society for Rheumatology (SFR) recommendations about the everyday management of patients with spondyloarthritis.

Recomendación 9: “En la mayoría de los pacientes, la terapia sistémica con glucocorticoides no está justificada, particularmente para tratar manifestaciones axiales. Las inyecciones locales de glucocorticoides pueden ser consideradas para el tratamiento de la artritis y de la entesis”.

Esta recomendación refleja las recomendaciones sobre terapia con glucocorticoides sistémicos y locales previas número 18 y 19 de la actualización de esta guía del año 2014. Dada la frecuencia y severidad de los eventos adversos, la terapia sistémica con glucocorticoides es inapropiada en la mayoría de pacientes con Espondiloartritis Axial. No hay estudios recientes que soporten un efecto benéfico de la terapia sistémica con glucocorticoides para tratar las manifestaciones axiales de la espondiloartritis Axial. En contraste, las inyecciones de glucocorticoides en las articulaciones periféricas afectadas, articulaciones sacroilíacas o en las entesis, proporcionan rápida mejoría de los síntomas en pacientes quienes tienen un número limitado de sitios involucrados.

## APÉNDICE 2. ANALISIS REALIZADOS- TABLAS Y FIGURAS

Tabla 1. Glucocorticoides Sistémicos Tomada de (22)

| BASDAI 50, BASDAI 20, ASAS 40 responses and ASAS partial remission |                       |                         |                           |                        |                           |
|--------------------------------------------------------------------|-----------------------|-------------------------|---------------------------|------------------------|---------------------------|
|                                                                    | Placebo (n=13)        | 20 mg (n=11)            | p Value, 20 mg vs Placebo | 50 mg (n=12)           | p Value, 50 mg vs Placebo |
| BASDAI 50                                                          | 8 (1 to 33)           | 27 (8 to 61)            | 0.30                      | 33 (12 to 65)          | 0.16                      |
| ASAS 20                                                            | 23 (7 to 52)          | 39 (20 to 73)           | 0.08                      | 58 (29 to 82)          | 0.19                      |
| ASAS 40                                                            | 15 (3 to 43)          | 27 (8 to 61)            | 0.63                      | 33 (12 to 65)          | 0.38                      |
| ASAS PR                                                            | 0 (0 to 22)           | 18 (3 to 50)            | 0.20                      | 17 (3 to 45)           | 0.22                      |
| BASDAI (mean, 95% CI)                                              | 0.66 (−0.34 to 1.66)  | 1.19 (0.12 to 2.27)     | 0.41                      | 2.39* (1.38 to 3.40)   | 0.033                     |
| BASDAI morning stiffness (mean, 95% CI)                            | 1.03 (−0.32 to 2.38)  | 1.27 (−0.19 to 2.74)    | 0.79                      | 3.41* (2.01 to 4.81)   | 0.020                     |
| BASFI (mean, 95% CI)                                               | 0.74 (−0.39 to 1.86)  | 0.94 (−0.37 to 2.24)    | 0.83                      | 1.76 (0.51 to 3.01)    | 0.20                      |
| PG (mean, 95% CI)                                                  | 0.94 (−0.65 to 2.52)  | 1.67 (−0.06 to 3.40)    | 0.47                      | 3.04 (1.41 to 4.68)    | 0.056                     |
| Pain (mean, 95% CI)                                                | 1.22 (−0.29 to 2.73)  | 1.83 (0.18 to 3.48)     | 0.51                      | 3.25 (1.68 to 4.82)    | 0.062                     |
| BASMI (mean, 95% CI)                                               | −0.13 (−0.80 to 0.53) | 0.32 (−0.41 to 1.04)    | 0.36                      | 0.93* (0.21 to 1.65)   | 0.020                     |
| ASDAS (mean, 95% CI)                                               | 0.34 (−0.22 to 0.90)  | 1.16* (0.45 to 1.88)    | 0.0036                    | 1.56* (0.93 to 2.20)   | 0.010                     |
| CRP (mean, 95% CI)                                                 | 3.19 (−3.35 to 9.74)  | 19.94* (11.54 to 28.34) | 0.0016                    | 15.58* (8.10 to 23.07) | 0.036                     |

Unless otherwise stated values are percentage (95% CI). Mean changes from baseline at week 2 adjusted for baseline values are shown with 95% CIs; positive values indicate better outcomes at week 2. Negative values indicate worsening, positive values indicate improvement of the parameters.  
ASAS 20, 20% improvement according to the ASAS criteria; ASAS 40, 40% improvement according to the ASAS criteria; ASAS PR, partial remission according to the ASAS criteria; ASAS, Assessments in SpondyloArthritis International Society; ASDAS, Ankylosing Spondylitis Disease Activity Score; BASDAI 50, 50% improvement of Bath Ankylosing Spondylitis Disease Activity Index; BASDAI morning stiffness, mean of BASDAI question 5 and 6 for morning stiffness; BASFI, Bath Ankylosing Spondylitis Functional Index; BASMI, Bath Ankylosing Spondylitis Metrology Index; CRP, C reactive protein; PG, patient global assessment.

Tabla 2. Glucocorticoides parenterales locales tomada de (14)

**Table III.** Visual analogue scale and pain index of the sacroiliac joint in the methylprednisolone group (MP) and the non-methylprednisolone group (Non-MP) from the baseline to two months after the injection.

| Pain assessment                           | Median (range) at baseline |                  | p value* | Median (range) change from baseline to month two ** |                    | p value * |
|-------------------------------------------|----------------------------|------------------|----------|-----------------------------------------------------|--------------------|-----------|
|                                           | MP                         | non-MP           |          | MP                                                  | non-MP             |           |
| Visual analogue (VAS)<br>(range)          | 54.5<br>(22 - 88)          | 38.5<br>(4 - 52) | 0.02     | -26.5<br>(-82 - 13)                                 | -1.5<br>(-47 - 38) | 0.02      |
| Pain index of sacroiliac joint<br>(range) | 7.5<br>(4 - 9)             | 6<br>(3 - 8)     | 0.10     | -4.5<br>(-7 - 0)                                    | -1.4<br>(-4 - 2)   | 0.01      |

\* Mann-Whitney rank-sum test. \*\* At two months minus baseline. Negative values indicate a better average outcome.

## APÉNDICE 3. Tablas GRADE

Pregunta: ¿En pacientes adultos con Espondiloartritis Axial son eficaces (control enfermedad, remisión/baja actividad de síntomas, mejoría de escalas de funcionalidad y calidad de vida, progresión radiográfica) y seguros (eventos adversos) los Glucocorticoides (locales o sistémicos)?

### Perfil 1. Glucocorticoides Sistémicos (6)

| Evaluación de calidad                                                                                                              |                          |                        |                                  |                     |                        |                    | No de pacientes  |         | Efecto   |                                                      | Calidad de la evidencia | Importancia del riesgo de sesgo |
|------------------------------------------------------------------------------------------------------------------------------------|--------------------------|------------------------|----------------------------------|---------------------|------------------------|--------------------|------------------|---------|----------|------------------------------------------------------|-------------------------|---------------------------------|
| No de estudios                                                                                                                     | Diseño                   | Riesgo de Sesgo        | Inconsistencia (I <sup>2</sup> ) | evidencia indirecta | imprecisión            | Otra consideración | glucocorticoides | control | Relativo | Absoluto                                             |                         |                                 |
| Estatus de salud: BASDAI (seguimiento a 2 semanas; rango de puntuación: 0-10; El más bajo valor es mejor)                          |                          |                        |                                  |                     |                        |                    |                  |         |          |                                                      |                         |                                 |
| 1                                                                                                                                  | Estudios aleatorizados   | no serio               | no seria                         | no seria            | no seria               | no                 | 12               | 13      | -        | MD 2.39 bajo (1.38 a 3.4 bajo) <sup>1</sup>          | ⊕○○○<br>Muy Baja        | Crítico                         |
| Estatus de salud: Dolor (seguimiento promedio de 4.5 meses; rango de puntuación: 0-100; El más bajo valor es mejor)                |                          |                        |                                  |                     |                        |                    |                  |         |          |                                                      |                         |                                 |
| 2                                                                                                                                  | Estudios observacionales | Muy serio <sup>2</sup> | no seria                         | no seria            | Muy serio <sup>2</sup> | no                 | 15               | -       | -        | MD 34 bajo (no se puede calcular el IC) <sup>3</sup> | ⊕○○○<br>Muy Baja        | Crítico                         |
| Estatus de salud: Reactantes de fase aguda (seguimiento a 2 semanas; medido con: PCR mg/L; El más bajo valor es mejor)             |                          |                        |                                  |                     |                        |                    |                  |         |          |                                                      |                         |                                 |
| 1                                                                                                                                  | Estudios aleatorizados   | no serio               | no seria                         | no seria            | no seria               | no                 | 12               | 13      | -        | MD 15.6 bajo (8.1 a 23.1 bajo)                       | ⊕○○○<br>Muy Baja        | No importante                   |
| Estatus funcional: BASFI (seguimiento a 2 semanas; rango de puntuación: 0-10; El más bajo valor es mejor)                          |                          |                        |                                  |                     |                        |                    |                  |         |          |                                                      |                         |                                 |
| 1                                                                                                                                  | Estudios aleatorizados   | no serio               | no seria                         | no seria            | no seria               | no                 | 12               | 13      | -        | MD 1.76 bajo (0.51 a 3.01 bajo) <sup>4</sup>         | ⊕○○○<br>Muy Baja        | Crítico                         |
| Estatus funcional: ROM – Schober's (seguimiento promedio de 6 meses; medido con: Schober's modificado; El valor más alto es mejor) |                          |                        |                                  |                     |                        |                    |                  |         |          |                                                      |                         |                                 |

| Evaluación de calidad                                                                                            |                          |                    |                                  |                     |                        |                    | No de pacientes  |         | Efecto   |                                                             | Calidad de la evidencia | Importancia del riesgo de sesgo |
|------------------------------------------------------------------------------------------------------------------|--------------------------|--------------------|----------------------------------|---------------------|------------------------|--------------------|------------------|---------|----------|-------------------------------------------------------------|-------------------------|---------------------------------|
| No de estudios                                                                                                   | Diseño                   | Riesgo de Sesgo    | Inconsistencia (I <sup>2</sup> ) | evidencia indirecta | imprecisión            | Otra consideración | glucocorticoides | control | Relativo | Absoluto                                                    |                         |                                 |
| 2                                                                                                                | Estudios observacionales | serio <sup>2</sup> | no seria                         | no seria            | Muy seria <sup>5</sup> | no                 | 12               | -       | -        | promedio 0.9 alto (no se puede calcular el IC) <sup>3</sup> | ⊕○○○<br>Muy Baja        | No importante                   |
| Estatus funcional: ROM – Dedo al piso <sup>3</sup> (seguimiento promedio de 6 meses; El valor más bajo es mejor) |                          |                    |                                  |                     |                        |                    |                  |         |          |                                                             |                         |                                 |
| 2                                                                                                                | Estudios observacionales | serio <sup>2</sup> | no seria                         | no seria            | Muy seria <sup>2</sup> | no                 | 12               | -       | -        | MD 0.9 baja (no se puede calcular el IC) <sup>3</sup>       | ⊕○○○<br>Muy Baja        | No importante                   |
| Estatus funcional: BASMI (seguimiento a 2 semanas; rango de puntuación: 0-10; El valor más bajo es mejor)        |                          |                    |                                  |                     |                        |                    |                  |         |          |                                                             |                         |                                 |
| 1                                                                                                                | Estudios aleatorizados   | no serio           | no seria                         | no seria            | no seria               | no                 | 12               | 13      | -        | no agrupada                                                 | ⊕○○○<br>Muy Baja        | No importante                   |

<sup>1</sup> Resultados significativamente diferentes entre 50mg de prednisolona y el control (p<0.03)

<sup>2</sup> Serie de casos (I<sup>2</sup> no calculable)

<sup>3</sup> Schober's mejoría de 0.9 cm; mejoría del dedo al piso en 13 cm; mejoría del dolor de 34mm

<sup>4</sup> Resultados NO significativos de la diferencia entre 50 mg de prednisolona y el control (p=0.2)

<sup>5</sup> No es claro que método de medición de Schober's

Calidad de la evidencia a-través de todos los desenlaces críticos Muy Baja

|                                     |                                                      |
|-------------------------------------|------------------------------------------------------|
| ECAS incluidos:                     | Haibel 2014 (22)                                     |
| Estudios observacionales incluidos: | Ejstrup 1985 (33), Richter 1983 (34), Mintz 1981(35) |

## Perfil 2. Glucocorticoides parenterales locales (6)

| Evaluación de calidad                                                                                                  |                          |                        |                     |                     |                    |                    | No de pacientes  |         | Efecto   |                                               | Calidad de la evidencia | Importancia del riesgo de sesgo |
|------------------------------------------------------------------------------------------------------------------------|--------------------------|------------------------|---------------------|---------------------|--------------------|--------------------|------------------|---------|----------|-----------------------------------------------|-------------------------|---------------------------------|
| No de estudios                                                                                                         | Diseño                   | Riesgo de Sesgo        | Inconsistencia (I²) | evidencia indirecta | imprecisión        | Otra consideración | glucocorticoides | control | Relativo | Absoluto                                      |                         |                                 |
| Estatus de Salud: Dolor (seguimiento promedio de 1.5 meses; rango de puntuación: 0-100; El valor más bajo es mejor)    |                          |                        |                     |                     |                    |                    |                  |         |          |                                               |                         |                                 |
| 2                                                                                                                      | Estudios aleatorizados   | serio <sup>1</sup>     | no seria (NC)       | seria <sup>2</sup>  | seria <sup>3</sup> | No                 | 11               | 13      | -        | MD 20 baja (no se puede calcular el ICI)      | ⊕○○○<br>Muy baja        | Crítica                         |
| Estatus de salud: Dolor at 9mo (seguimiento promedio de 18 meses; rango de puntaje: 0-100; El valor más bajo es mejor) |                          |                        |                     |                     |                    |                    |                  |         |          |                                               |                         |                                 |
| 4                                                                                                                      | Estudios observacionales | Muy serio <sup>1</sup> | no seria (NC)       | no seria            | no seria           | No                 | 85               | -       | -        | promedio 45 bajo (no se puede calcular el IC) | ⊕○○○<br>Muy baja        | Importante                      |

<sup>1</sup> números pequeños; no ciego

<sup>2</sup> cumplen con ESSG + Amor y especifica que los pacientes tienen AS, pero no es claro que todos los pacientes cumplen con mNYCC. Excluye Individuos con SAPHO

<sup>3</sup> La medición no es estandarizada

Calidad de la evidencia a-través de todos los desenlaces críticos Muy Baja

|                                     |                                        |
|-------------------------------------|----------------------------------------|
| ECAs incluidos:                     | Maugars 1996 (25) Luukkainen 1999 (14) |
| Estudios Observacionales incluidos: | Gunaydin 2006 (36); Migliore 2009 (37) |

## Referencias

1. Braun J, Sieper J. Ankylosing spondylitis. *The Lancet* [Internet]. 2007 Apr;369(9570):1379–90. Available from: <https://linkinghub.elsevier.com/retrieve/pii/S0140673607606357>
2. Zochling J, Smith EUR. Seronegative spondyloarthritis. *Best Practice & Research Clinical Rheumatology* [Internet]. 2010 Dec;24(6):747–56. Available from: <https://linkinghub.elsevier.com/retrieve/pii/S152169421100026X>
3. Perez Alamino R, Maldonado Cocco JA, Citera G, Arturi P, Vazquez-Mellado J, FLORES D, et al. Differential Features Between Primary Ankylosing Spondylitis and Spondylitis Associated with Psoriasis and Inflammatory Bowel Disease. *The Journal of Rheumatology* [Internet]. 2011 Aug;38(8):1656–60. Available from: <http://www.jrheum.org/lookup/doi/10.3899/jrheum.101049>
4. Linden S van der, Valkenburg HA, Cats A. Evaluation of Diagnostic Criteria for Ankylosing Spondylitis. *Arthritis & Rheumatism* [Internet]. 1984 Apr;27(4):361–8. Available from: <http://doi.wiley.com/10.1002/art.1780270401>
5. Rudwaleit M, van der Heijde D, Landewe R, Listing J, Akkoc N, Brandt J, et al. The development of Assessment of SpondyloArthritis international Society classification criteria for axial spondyloarthritis (part II): validation and final selection. *Annals of the Rheumatic Diseases* [Internet]. 2009 Jun 1;68(6):777–83. Available from: <http://ard.bmj.com/cgi/doi/10.1136/ard.2009.108233>
6. Ward MM, Deodhar A, Akl EA, Lui A, Ermann J, Gensler LS, et al. American College of Rheumatology/Spondylitis Association of America/Spondyloarthritis Research and Treatment Network 2015 Recommendations for the Treatment of Ankylosing Spondylitis and Nonradiographic Axial Spondyloarthritis. *Arthritis Care & Research* [Internet]. 2016 Feb;68(2):151–66. Available from: <http://doi.wiley.com/10.1002/acr.22708>
7. Coombes BK, Bisset L, Vicenzino B. Efficacy and safety of corticosteroid injections and other injections for management of tendinopathy: a systematic review of randomised controlled trials. *The Lancet* [Internet]. 2010 Nov;376(9754):1751–67. Available from: <https://linkinghub.elsevier.com/retrieve/pii/S0140673610611609>
8. Metcalfe D, Achten J, Costa ML. Glucocorticoid Injections in Lesions of the Achilles Tendon. *Foot & Ankle International* [Internet]. 2009 Jul;30(7):661–5. Available from: <http://journals.sagepub.com/doi/10.3113/FAI.2009.0661>
9. Wallen MM, Gillies D. Intra-articular steroids and splints/rest for children with juvenile idiopathic arthritis and adults with rheumatoid arthritis. *Cochrane Database of Systematic Reviews* [Internet]. 2006 Jan 25; Available from: <http://doi.wiley.com/10.1002/14651858.CD002824.pub2>
10. Huscher D, Thiele K, Gromnica-Ihle E, Hein G, Demary W, Dreher R, et al. Dose-related patterns of glucocorticoid-induced side effects. *Annals of the Rheumatic Diseases* [Internet]. 2009 Jul 1;68(7):1119–24. Available from: <http://ard.bmj.com/cgi/doi/10.1136/ard.2008.092163>
11. McDonough AK, Curtis JR, Saag KG. The epidemiology of glucocorticoid-associated adverse events. *Current Opinion in Rheumatology* [Internet]. 2008 Mar;20(2):131–7. Available from: <http://journals.lww.com/00002281-200803000-00004>



12. Cecconi M, Ranza R, Tittton DC, Moraes JCB, Bertolo M, Bianchi W, et al. Incidence of Infectious Adverse Events in Patients With Rheumatoid Arthritis and Spondyloarthritis on Biologic Drugs—Data From the Brazilian Registry for Biologics Monitoring. *JCR: Journal of Clinical Rheumatology* [Internet]. 2020 Mar;26(2):73–8. Available from: <http://journals.lww.com/10.1097/RHU.0000000000000935>
13. Huscher D, Thiele K, Gromnica-Ihle E, Hein G, Demary W, Dreher R, et al. Dose-related patterns of glucocorticoid-induced side effects. *Annals of the Rheumatic Diseases* [Internet]. 2009 Jul 1;68(7):1119–24. Available from: <http://ard.bmj.com/cgi/doi/10.1136/ard.2008.092163>
14. Luukkainen R, Nissilä M, Asikainen E, Sanila M, Lehtinen K, Alanaatu A, et al. Periarticular corticosteroid treatment of the sacroiliac joint in patients with seronegative spondylarthropathy. Vol. 17, *Clinical and Experimental Rheumatology*. 1999.
15. Robson JC, Dawson J, Cronholm PF, Ashdown S, Easley E, Kellom KS, et al. Patient perceptions of glucocorticoids in anti-neutrophil cytoplasmic antibody-associated vasculitis. *Rheumatology International* [Internet]. 2018 Apr 9;38(4):675–82. Available from: <http://link.springer.com/10.1007/s00296-017-3855-6>
16. Pisu M, James N, Sampsel S, Saag KG. The cost of glucocorticoid-associated adverse events in rheumatoid arthritis. *Rheumatology* [Internet]. 2005 Jun 1;44(6):781–8. Available from: <http://academic.oup.com/rheumatology/article/44/6/781/1784792/The-cost-of-glucocorticoid-associated-adverse>
17. Khan MA. Update on Spondyloarthropathies. *Annals of Internal Medicine* [Internet]. 2002 Jun 18;136(12):896. Available from: <http://annals.org/article.aspx?doi=10.7326/0003-4819-136-12-200206180-00011>
18. Stolwijk C, van Onna M, Boonen A, van Tubergen A. Global Prevalence of Spondyloarthritis: A Systematic Review and Meta-Regression Analysis. *Arthritis Care & Research* [Internet]. 2016 Sep;68(9):1320–31. Available from: <http://doi.wiley.com/10.1002/acr.22831>
19. Fernández-Ávila DG, Bernal-Macias S, Rincón D, Gutiérrez J. Prevalence of Rheumatic diseases in Colombia: an approach from ministry of health and social protection data (SISPRO). In: Poster Presentations [Internet]. 2019. p. 629.1-629. Available from: <http://ard.bmj.com/lookup/doi/10.1136/annrheumdis-2019-eular.6955>
20. Londoño J, Peláez Ballestas I, Cuervo F, Angarita I, Giraldo R, Rueda JC, et al. Prevalencia de la enfermedad reumática en Colombia, según estrategia COPCORD-Asociación Colombiana de Reumatología. Estudio de prevalencia de enfermedad reumática en población colombiana mayor de 18 años. *Revista Colombiana de Reumatología* [Internet]. 2018 Oct;25(4):245–56. Available from: <https://linkinghub.elsevier.com/retrieve/pii/S0121812318300951>
21. Maugars Y, Mathis C, Berthelot J-M, Charlier C, Prost A. Assessment of the efficacy of sacroiliac corticosteroid injections in spondylarthropathies: a double-blind study [Internet]. Vol. 35, *British Journal of Rheumatology*. 1996. Available from: <http://rheumatology.oxfordjournals.org/>
22. Haibel H, Fendler C, Listing J, Callhoff J, Braun J, Sieper J. Efficacy of oral prednisolone in active ankylosing spondylitis: Results of a double-blind, randomised, placebo-controlled short-term trial. *Annals of the Rheumatic Diseases*. 2014 Jan;73(1):243–6.

23. Zhang Y-P, Gong Y, Zeng QY, Hou Z-D, Xiao Z-Y. A long-term, observational cohort study on the safety of low-dose glucocorticoids in ankylosing spondylitis: adverse events and effects on bone mineral density, blood lipid and glucose levels and body mass index. *BMJ Open* [Internet]. 2015 Jun 3;5(6):e006957–e006957. Available from: <http://bmjopen.bmj.com/cgi/doi/10.1136/bmjopen-2014-006957>
24. Rohekar S, Chan J, Tse SML, Haroon N, Chandran V, Bessette L, et al. 2014 Update of the Canadian Rheumatology Association/Spondyloarthritis Research Consortium of Canada Treatment Recommendations for the Management of Spondyloarthritis. Part II: Specific Management Recommendations. *The Journal of Rheumatology* [Internet]. 2015 Apr;42(4):665–81. Available from: <http://www.jrheum.org/lookup/doi/10.3899/jrheum.141001>
25. Maugars Y, Mathis C, Vilon P, Prost A. Corticosteroid injection of the sacroiliac joint in patients with seronegative spondylarthropathy. *Arthritis & Rheumatism* [Internet]. 1992 May;35(5):564–8. Available from: <http://doi.wiley.com/10.1002/art.1780350512>
26. Bollow M, Braun J, Taupitz M, Häberle J, Reihauer B-H, Paris S, et al. CT-Guided Intraarticular Corticosteroid Injection into the Sacroiliac Joints in Patients with Spondyloarthropathy: Indication and Follow-Up with Contrast-Enhanced MRI. *Journal of Computer Assisted Tomography* [Internet]. 1996 Jul;20(4):512–21. Available from: <http://journals.lww.com/00004728-199607000-00002>
27. Braun J BMSF et al. Computed Tomography Guided Corticosteroid Injection of the Sacroiliac Joint in Patients With Spondyloarthropathy With Sacroiliitis: Clinical Outcome and Followup by Dynamic Magnetic Resonance Imaging. *J Rheumatol*. 1996;23(4):659–64.
28. Karabacakoglu A, Karakose S, Ozerbil OM, Odev K. Fluoroscopy-guided intraarticular corticosteroid injection into the sacroiliac joints in patients with ankylosing spondylitis. *Acta Radiologica* [Internet]. 2002 Jul;43(4):425–7. Available from: <http://www.informaworld.com/openurl?genre=article&doi=10.1034/j.1600-0455.2002.430415.x&magic=crossref|D404A21C5BB053405B1A640AFFD44AE3>
29. Dussault RG, Kaplan PA, Anderson MW. Fluoroscopy-guided Sacroiliac Joint Injections. *Radiology* [Internet]. 2000 Jan;214(1):273–7. Available from: <http://pubs.rsna.org/doi/10.1148/radiology.214.1.r00ja28273>
30. van der Heijde D, Ramiro S, Landewé R, Baraliakos X, van den Bosch F, Sepriano A, et al. 2016 update of the ASAS-EULAR management recommendations for axial spondyloarthritis. *Annals of the Rheumatic Diseases* [Internet]. 2017 Jun;76(6):978–91. Available from: <http://ard.bmj.com/lookup/doi/10.1136/annrheumdis-2016-210770>
31. Ward MM, Deodhar A, Gensler LS, Dubreuil M, Yu D, Khan MA, et al. 2019 Update of the American College of Rheumatology/Spondylitis Association of America/Spondyloarthritis Research and Treatment Network Recommendations for the Treatment of Ankylosing Spondylitis and Nonradiographic Axial Spondyloarthritis. *Arthritis & Rheumatology* [Internet]. 2019 Oct 22;71(10):1599–613. Available from: <https://onlinelibrary.wiley.com/doi/abs/10.1002/art.41042>
32. Wendling D, Lukas C, Prati C, Claudepierre P, Gossec L, Goupille P, et al. 2018 update of French Society for Rheumatology (SFR) recommendations about the everyday management of patients with

spondyloarthritis. *Joint Bone Spine* [Internet]. 2018 May;85(3):275–84. Available from: <https://linkinghub.elsevier.com/retrieve/pii/S1297319X18300083>

33. L Ejstrup NDP. Intravenous Methylprednisolone Pulse Therapy in Ankylosing Spondylitis. *Dan Med Bull*. 1985;32(4):231–3.

34. M B Richter PWGSPATAUPS. The effects of intravenous pulse methylprednisolone on immunological and inflammatory processes in ankylosing spondylitis. *Clin Exp Immunol*. 1983;53(1):51–9.

35. Mintz G, Enríquez RD, Mercado U, Robles EJ, Javier Jiménez F, Gutiérrez G. Intravenous methylprednisolone pulse therapy in severe ankylosing spondylitis. *Arthritis & Rheumatism* [Internet]. 1981 May;24(5):734–6. Available from: <http://doi.wiley.com/10.1002/art.1780240521>

36. Günaydin I, Pereira PL, Fritz J, König C, Kötter I. Magnetic resonance imaging guided corticosteroid injection of sacroiliac joints in patients with spondylarthropathy. Are multiple injections more beneficial? *Rheumatology International*. 2006 Mar;26(5):396–400.

37. A Migliore EBUMFVLSM-MMGST. A New Technical Contribution for Ultrasound-Guided Injections of Sacro-Iliac Joints. *Eur Rev Med Pharmacol Sci*. 2010;14(5):465–9.

## Pregunta 7:

¿En pacientes adultos con Espondiloartritis Axial activa que han fallado a AINES (medicamentos antiinflamatorios no esteroideos) cuál de los siguientes grupos de medicamentos (1- Anti TNF 2-anti IL-17 3- Anti IL-23 4- inhibidores JAK) se debe usar como siguiente opción de tratamiento por ser más eficaz (control enfermedad, remisión/baja actividad de síntomas, mejoría de escalas de funcionalidad y calidad de vida, progresión radiográfica) y seguro (eventos adversos)?

|                     |                                                                                                                                                                                                           |
|---------------------|-----------------------------------------------------------------------------------------------------------------------------------------------------------------------------------------------------------|
| <b>Población</b>    | Pacientes con espondiloartritis axial (EspAax) que han fallado al tratamiento con AINES                                                                                                                   |
| <b>Intervención</b> | Inhibidores TNFa; anti IL-17A; anti-IL12-23; inhibidores JAK                                                                                                                                              |
| <b>Comparación</b>  | Inhibidores TNFa; anti IL-17A; anti-IL12-23; inhibidores JAK                                                                                                                                              |
| <b>Desenlaces</b>   | Efectividad: (Control de la enfermedad, Remisión/baja actividad de síntomas: ASAS20 y ASAS40)<br><br>Calidad de vida<br><br>Progresión radiográfica<br><br>Perfil de seguridad: (Eventos adversos graves) |

### Antecedentes

El término espondiloartritis axial (EspAax) comprende la espondilitis anquilosante (EA) y la espondiloartritis axial no-radiográfica (EspAax-nr). Ambas son consideradas enfermedades similares, de naturaleza autoinmune, en las que ocurre inflamación de articulaciones de la columna y la pelvis con un predominio lumbar y sacroilíaco. Ambas entidades causan dolor, limitan el movimiento y afectan la calidad de vida de los afectados.

En pacientes con EspAax, la primera opción de tratamiento para el manejo sintomático y control de la enfermedad son los antiinflamatorios no esteroideos (AINEs)(1). Sin embargo, en una proporción alta de pacientes (reportado hasta 40%) no alcanzan los objetivos terapéuticos de control de dolor o reducción en la actividad de la enfermedad con estos medicamentos (2). Con el interés de dar mejor control a la sintomatología de estos pacientes, surge el interrogante sobre qué fármacos deberían usarse como segunda opción de tratamiento, dada la falla con AINEs.

En otras enfermedades autoinmunes que afectan las articulaciones, la segunda opción de tratamiento suelen ser medicamentos antirreumáticos sintéticos convencionales modificadores de enfermedad (cDMARDs por sus siglas en inglés); como metotrexate, sulfasalazina o leflunomide. Sin embargo, en el tratamiento de EspAax no se ha probado la efectividad de estos medicamentos. La alternativa utilizada han sido los medicamentos antagonistas del factor de necrosis tumoral alfa (iTnFa); un grupo con varias moléculas aprobadas para el tratamiento de esta patología y para las que se han desarrollado numerosos experimentos clínicos. Estos medicamentos, que incluyen el adalimumab, certolizumab, golimumab, infliximab, entre otros, han logrado efectividad satisfactoria

en el control de la enfermedad. No obstante, estos medicamentos presentan un riesgo considerable de infecciones recurrentes, y su efecto sobre manifestaciones extraarticulares de la enfermedad (como uveítis, colitis, psoriasis o artritis periférica) es variable. Dichas manifestaciones condicionan la elección del tratamiento con los iTNFa en algunos pacientes (3).

Más recientemente, el conocimiento sobre el rol de diferentes mediadores inmunes en la progresión de la EspAax y otras enfermedades autoinmunes ha llevado al desarrollo e indicación de medicamentos con nuevos objetivos terapéuticos. Estos incluyen el desarrollo de inhibidores de la janus quinasa (iJAK), antagonistas de IL-17A (anti-IL17A) y antagonistas de IL-12;23 (anti-IL12;23); también usados en enfermedades como la psoriasis o la enfermedad intestinal inflamatoria. Por esto, algunos de estos medicamentos se postulan como alternativas efectivas y seguras para el tratamiento de EspAax en pacientes que han fallado a AINEs, especialmente atractivos por el potencial de tener efectos deseables sobre manifestaciones extraarticulares de la enfermedad, como se mencionó previamente.

Aquí se revisa la evidencia disponible sobre el efecto de medicamentos de estas cuatro clases (iTNFa, anti-IL17A, iJAK, anti-IL12-23) al usarse como tratamiento en pacientes con EspAax que no han tolerado o respondido a AINEs.

## Evidencia

### Efectividad

La búsqueda de literatura (ver en anexo) no identificó estudios primarios que comparen en paralelo el efecto de iTNFa, anti-IL17A, anti-IL12-23 e iJAK. Se identificó un estudio que comparó ixekizumab (anti-IL17A) en dos dosis diferentes con adalimumab (iTNFa) y placebo (4). También se identificaron varios estudios que evaluaron individualmente medicamentos de las clases de interés en estudios controlados con placebo (5-9). Todos los estudios considerados cumplen con la característica de haber incluido pacientes que no habían tolerado o habían fallado al tratamiento de primera línea con AINEs y que no habían sido tratados previamente con terapia biológica. Algunos estudios incluyeron solo pacientes con EA; otros solo pacientes con EspAax-nr, y otros más incluyen EspAax en general, algunos sin reportar resultados individualmente.

### *Anti-IL17A vs anti TNF*

Se compararon ambos medicamentos contra placebo en un experimento clínico aleatorizado (ECA) de 4 brazos (2 regímenes diferentes de ixekizumab; adalimumab; placebo). Los 3 grupos de intervención fueron superiores a placebo. El estudio no reporta comparaciones directas entre los grupos de intervención, pero estas son posibles de obtener a partir de los datos reportados: En el grupo de Ixekinumab cada dos semanas, 52% de los pacientes tuvieron respuesta ASAS40, comparado con 36% en el grupo de adalimumab (RR 1.44, IC 95%=1.04 ; 2.06). En el grupo con ixekizumab cada cuatro semanas, 48% de los pacientes tuvieron respuesta (RR= 1.35 IC 95%= 0.95; 1.94, comparado con adalimumab). Al comparar la proporción de pacientes con respuesta ASAS20 la diferencia es menor: ixekizumab c/2 semanas =69% vs adalimumab = 59% (RR= 1.17, IC 95% 0.94 ; 1.46), ixekizumab c/4 semanas = 64% (RR=1.09, IC 95%= 0.86 ; 1.38) comparado con adalimumab)(4).

### *Anti- TNF vs placebo:*

Una revisión sistemática Cochrane de 2015 evaluó el efecto de diferentes iTNFa en el tratamiento de EA. Incluyó 4 estudios de adalimumab, 8 de etanercept, 2 de golimumab y 3 de infliximab, encontrando evidencia de calidad alta sobre el beneficio de usar iTNFa en EA, dado por mejoría en dolor, función, rigidez, y bienestar general (Maxwell 2015). En otra revisión más reciente, se hizo un análisis agregado de respuesta ASAS20 bajo tratamiento con iTNFa comparado con placebo (14 ECAs) que mostró OR= 4.31, IC95% 3.57; 5.20). No hubo heterogeneidad estadística ( $I^2 = 0\%$ ) (5).

### *Anti-IL17A vs placebo*

El secukinumab ha sido evaluado en varios ECAs conocidos como los estudios MEASURE (I,II y III) para el tratamiento de EspAax, y más recientemente en el estudio PREVENT para el tratamiento de la EspAax-nr. Para el tratamiento de EspAax, el estimado acumulado (basado en 4 ECAs) de secukinumab para obtener respuesta ASAS20 comparado con placebo es OR= 3.24, IC 95%= 2.38 – 4.41. El beneficio de este también es observable sobre las demás medidas usuales de efectividad en EspAax (3). En el estudio PREVENT, que incluyó solo pacientes EspAax-nr, el 41% de los pacientes que recibieron secukinumab tuvieron en respuesta ASAS40, comparado con 29% en el grupo placebo (6).

Otra molécula de esta clase estudiada para el tratamiento de EspAax-nr es el ixekizumab (mencionado en la sección “Anti-IL17A vs antiTNF” para el tratamiento de EA). En el estudio COAST-X que solo incluyó pacientes con EspAax-nr se observó una respuesta ASAS40 luego de 52 semanas en 30% y 31% de los pacientes recibiendo ixekizumab cada 4 y 2 semanas, respectivamente; comparado con 13% en el grupo placebo [ $p = 0.004$  (c/4 semanas) y  $p = 0.003$  (c/2 semanas)]. También se encontró beneficio comparado con placebo en los desenlaces secundarios del estudio (7).

### *iJAK vs placebo:*

Se identificaron estudios individuales de upadacitinib vs placebo; filgotinib vs placebo; y tofacitinib vs placebo. Todos estos medicamentos se asociaron a mejoría según ASAS40 comparado con placebo. El estudio de Upacitinib (el más reciente, 2019) reportó respuesta ASAS40 en 52% de pacientes comparado con 26% para placebo; la frecuencia de eventos adversos fue similar (62% vs 55%). El estudio de filgotinib reporta resultados menos satisfactorios de ASAS40, con respuesta según este criterio solo en 38% de los pacientes (vs 19% en placebo). Para ASAS20 los resultados fueron: filgotinib 76% y placebo 40%. Tofacitinib por su lado, se asoció a mejoría ASAS40 en 46% comparado con placebo 19.6% (8–10).

### *Anti-IL12-23*

De este grupo farmacológico se identificó el reporte de 3 estudios (2 en EspAax y 1 en EspAax-nr) que evaluaron ustekinumab, sin embargo, no se demostró ningún beneficio clínico de este medicamento luego de 24 semanas, y dos de los estudios fueron suspendidos (11).

## Comparaciones indirectas

### *iTNFa vs anti-IL17A vs iJAK*

Una revisión sistemática sobre tratamiento biológico en EA, realizó comparaciones indirectas entre iTNFa “antiguos” (infliximab, etanercept, adalimumab, golimumab) y secukinumab, certolizumab, y tofacitinib a partir de los estudios individuales controlados con placebo. Este análisis no encontró diferencias significativas entre los grupos de medicamentos. Tampoco se encontraron diferencias al comparar indirectamente secukinumab, certolizumab y tofacitinib entre sí. El OR derivado para alcanzar ASAS20 con iTNFa antiguos comparado con placebo se reporta igual a 4.31 (IC 95%, =3.57;5.20), sin heterogeneidad entre los estudios (14 ECAs)(5).

### *iTNFa vs anti-IL17A*

Otra revisión sistemática con metaanálisis en red, comparó secukinumab con adalimumab a partir de estudios primarios. Esta reporta a ambos medicamentos como superiores a placebo, más no encontró evidencia estadística de superioridad entre los medicamentos (12).

### *Otros medicamentos propuestos*

No se recomienda el uso de anti-IL6, rituximab o abatacept por la falta de efectividad clínica (3). También se han estudiado en ECAs el risankizumab, bimekizumab, sarilumab y tocilizumab, sin embargo no se ha demostrado un beneficio de estos medicamentos en EA (3).

### Calidad de vida relacionada con salud

Los estudios evaluados reportan medidas de calidad hechas con el instrumento SF-36. Los análisis agregados muestran un beneficio significativo y deseable sobre la calidad de vida en pacientes tratados con iTNFa. Adicionalmente, a partir de los resultados de estudios que usaron utilidades para evaluaciones económicas, es posible concluir que tanto los iTNFa como el secukinumab fueron medicamentos que se asociaron a incrementos sustanciales en QALYs a través de todos los estudios al ser comparados con placebo.

Una muestra de 680 pacientes con EspAax-nr fue encuestada en busca de promover la referencia, cuidado y uso de tratamientos efectivos en esta enfermedad. Se utilizó la información reportada por estos pacientes para comparar los AINEs con la terapia biológica en cuando a preferencias de los pacientes. Se analizaron 189 pacientes que hubieran recibido ambos medicamentos. Un mayor porcentaje de pacientes percibió mejoría en términos de calidad de vida al recibir terapia biológica comparado con AINEs (57% vs 22%) (13).

### Eventos adversos serios y no serios

En la revisión Cochrane mencionada previamente, la baja frecuencia de eventos adversos en los estudios de cada molécula hizo imposible obtener resultados conclusivos respecto a la frecuencia. El análisis acumulado de todos los iTNFa comparados con placebo (16 ECAs) mostró mayor riesgo de retiro del estudio debido a eventos adversos asociado a uso de iTNFa (OR= 2.44 , IC 95% = 1.26 ; 4.72). Sin embargo, la ocurrencia total de eventos adversos en todos los estudios fue baja para los grupos, por lo que este efecto se traduce en un incremento absoluto de daño marginal (DR=1%; 95% CI 0% a 2%) (14).

Para secukinumab, el estimado acumulado de la asociación con eventos adversos comparado con placebo es OR 1.03 IC95% (0.32 - 3.26). Una revisión sistemática reciente quiso evaluar el riesgo de eventos adversos asociados a secukinumab a largo plazo (5 años) a través de una base de datos administrativa. Este estudio reporta que la frecuencia de eventos adversos asociados a secukinumab fue baja y no existe un patrón discernible de eventos adversos para el mismo. La tasa de eventos adversos ajustada por exposición para pacientes con espondilitis anquilosante se calculó en 6.3 por 100 pacientes-año (15).

Una revisión sistemática con metaanálisis en red (mencionada previamente) que comparó indirectamente secukinumab con adalimumab, no encontró diferencias respecto a la frecuencia de eventos adversos entre los grupos evaluado, por lo que su seguridad se considera comparable (12).

#### Valores y preferencia de pacientes

Las medidas de efectividad reportadas por los ECAs evaluados son medidas que derivan principalmente de la percepción y sensación de mejora de los pacientes. ASAS20 o ASAS40, son medidas que dependen de mejoría sustanciales en control de dolor, funcionalidad, y bienestar en general de los pacientes, por lo que consideramos que el beneficio según estas medidas reflejan parcialmente las preferencias del paciente. Características de la forma y frecuencia de administración de algunos iTNFa (intravenosa o subcutánea) parecen ser las principales quejas reportadas, junto con miedos a sufrir efectos indeseables a largo plazo (como desarrollo de neoplasias) (16).

Una muestra de 680 pacientes con EspAax-nr fue encuestada en busca de promover la referencia, cuidado y uso de tratamientos efectivos en esta enfermedad. Se utilizó la información reportada por estos pacientes para comparar los AINEs con la terapia biológica en cuanto a preferencias de los pacientes. Se analizaron 189 pacientes que hubieran recibido ambos medicamentos. Un mayor porcentaje de pacientes percibió mejoría en términos de calidad de vida al recibir terapia biológica comparado con AINEs (57% vs 22%) (13).

#### Costos

No se identificaron estudios de costos, o análisis de costo-efectividad adelantados en la población colombiana o en poblaciones de Latinoamérica. En Europa los costos relacionados con EA son variables entre países diferentes, probablemente relacionado con el hecho que el mayor componente de los costos en EA son los costos indirectos, responsables de un 53 a 62% del total (17).

En cuanto a la costo-efectividad de diferentes iTNFa en EA, se identificó una evaluación económica de buena calidad hecha para Reino Unido, con un horizonte temporal de toda la vida, a costos de 2016. Esta señala la amplia variabilidad en asunciones y modelos de costos encontrada entre los estudios que reportan costos de terapia biológica en EA. Esta revisión encontró razones de costo-efectividad incremental (ICER) entre £19,240 (certolizumab) hasta £40,576 per QALY (infliximab fue el del ICER más alto)(18).

Una revisión sistemática que quiso evaluar los costos por respondedor de la terapia biológica en pacientes con EspAax-nr incluyó estudios de adalimumab, etanercept y certolizumab. Esta encontró que adalimumab fue el medicamento con el NNT y el costo por respondedor más bajo, siendo dominante sobre las otras alternativas de tratamiento comparadas (19).



Evidencia económica reciente sobre el secukinumab sugiere que se trata de una alternativa que puede reducir los costos asociados a tratamientos de EspAax con iTNFa (3). La conclusión del comité de evaluación económica NICE en este respecto, señala que secukinumab tiene los costos más bajos de adquisición y administración, y estuvo asociado con más años de vida ajustado por calidad (QALY) que los iTNFa con los que fue comparado. En todos los escenarios explorados fue consistentemente el medicamento menos costoso(3).

Una revisión reciente sobre secukinumab en Canadá, también reporta que se trata del medicamento con mayor beneficio a menor costo (2º en incremento de QALYs, 1º en bajo costo) en pacientes que previamente no han sido tratados con biológicos(20).

A pesar que no se encontraron estudios económicos publicados sobre secukinumab en el contexto colombiano, sí se identificaron los resúmenes de evaluaciones económicas enviados y aceptados a congresos de economía de la salud. Entre estos destaca un reporte preliminar de un estudio que comparó secukinumab con certolizumab, etanercept y adalimumab; los iTNFa más usados en Colombia. Este encontró que secukinumab resultó más efectiva (incremento QALY marginal) y menos costosa (reducción de 27 a 39 millones COP en) que los comparadores (21). Otro reporte preliminar hecho en Colombia señala que Secukinumab tuvo un costo por respuesta (ASAS) más bajo que infliximab y adalimumab luego de 24 semanas, concluyendo que es más eficiente tratar pacientes de EA con Secukinumab que con Adalimumab o Infliximab en el contexto colombiano (22).

## Marco de la evidencia a las decisiones

| PREGUNTA               |                                                                                   |
|------------------------|-----------------------------------------------------------------------------------|
| POBLACION              | Población de espondilitis anquilosante y espondiloartritis axial no-radiográfica. |
| INTERVENCIÓN           | anti -IL17A; anti IL-17; anti-IL12-23; inhibidores JAK                            |
| COMPARACIÓN            | anti -IL17A; anti IL-17; anti-IL12-23; inhibidores JAK                            |
| DESENLACES PRINCIPALES | Efectividad- Respuesta terapéutica<br>Perfil de seguridad – EVENTOS ADVERSOS      |
| ÁMBITO                 | Ambulatorio                                                                       |
| PERSPECTIVA            | Del grupo desarrollador de la Guía                                                |
| CONFLICTO DE INTERÉS:  | Ninguno identificado                                                              |

## Evaluación

| Problema                                                                                                                                                                                                                       |                                                                                                                                                                                                                                                                                                                                                                                                                                                                                                                                                                                                                                                                                                                                                                                                       |                             |
|--------------------------------------------------------------------------------------------------------------------------------------------------------------------------------------------------------------------------------|-------------------------------------------------------------------------------------------------------------------------------------------------------------------------------------------------------------------------------------------------------------------------------------------------------------------------------------------------------------------------------------------------------------------------------------------------------------------------------------------------------------------------------------------------------------------------------------------------------------------------------------------------------------------------------------------------------------------------------------------------------------------------------------------------------|-----------------------------|
| Es el problema una prioridad?                                                                                                                                                                                                  |                                                                                                                                                                                                                                                                                                                                                                                                                                                                                                                                                                                                                                                                                                                                                                                                       |                             |
| JUICIO                                                                                                                                                                                                                         | EVIDENCIA DE LA INVESTIGACION                                                                                                                                                                                                                                                                                                                                                                                                                                                                                                                                                                                                                                                                                                                                                                         | CONSIDERACIONES ADICIONALES |
| <input type="radio"/> No<br><input type="radio"/> Probablemente No<br><input type="radio"/> Probablemente Si<br><input checked="" type="radio"/> Si<br><input type="radio"/> Es variable<br><input type="radio"/> No se conoce | La espondiloartritis axial afecta crónicamente varias articulaciones de la columna y la pelvis, generando dolor, limitación funcional, deformidad y deterioro de la calidad de vida. Los AINES representan la primera línea de manejo, pero en los pacientes que la enfermedad continúa activa a pesar del manejo convencional, surge la duda acerca del grupo farmacológico adecuado para emplear como segunda opción de manejo. Los inhibidores de TNFa son la clase con más años en el mercado y han tenido un efecto satisfactorio. No obstante, consideraciones entorno a su efecto sobre manifestaciones extraarticulares, y costos, entre otras, abren la posibilidad a que medicamentos más novedosos se postulen como opciones preferidas luego de haber intentado el tratamiento con AINES. |                             |
| Efectos deseables (beneficios de la opción a recomendar)                                                                                                                                                                       |                                                                                                                                                                                                                                                                                                                                                                                                                                                                                                                                                                                                                                                                                                                                                                                                       |                             |
| ¿Qué tan sustanciales son los efectos deseables de la opción?                                                                                                                                                                  |                                                                                                                                                                                                                                                                                                                                                                                                                                                                                                                                                                                                                                                                                                                                                                                                       |                             |
| JUICIO                                                                                                                                                                                                                         | EVIDENCIA DE LA INVESTIGACION                                                                                                                                                                                                                                                                                                                                                                                                                                                                                                                                                                                                                                                                                                                                                                         | CONSIDERACIONES ADICIONALES |
| <input type="radio"/> Triviales<br><input type="radio"/> Pequeños<br><input type="radio"/> Moderados<br><input checked="" type="radio"/> Grandes<br><input type="radio"/> Varían<br><input type="radio"/> No se sabe           | 1. iTNFa vs tratamiento sin iTNFa para mejorar desenlaces en adultos con espondilitis anquilosante activa a pesar de tratamiento con AINES.                                                                                                                                                                                                                                                                                                                                                                                                                                                                                                                                                                                                                                                           |                             |

|                                                                                                | Desenlaces                        | Nº de estudios (nº de participantes) | Certeza de la evidencia (GRADE) | Efecto (95% CI)                            | Diferencia Absoluta (% Expuestos vs Control) |
|------------------------------------------------------------------------------------------------|-----------------------------------|--------------------------------------|---------------------------------|--------------------------------------------|----------------------------------------------|
|                                                                                                | Pacientes que alcanzan ASAS20     | 19 ECAs (3430)                       | Alta                            | OR 3.99<br>(3.27 - 4.88)                   | 33.5%<br>(65.2%vs 31.7%)                     |
|                                                                                                | Pacientes que alcanzan ASAS40     | 12 ECAS (2526)                       | Alta                            | OR 4.34<br>(3.25 ; - 5.81)                 | 30.6%<br>(50.8%vs20.2%)                      |
|                                                                                                | BASFI                             | 17 ECAs (2672)                       | Alta                            | MD 4.37 menos<br>(7.85 menos a 0.89 menos) | N/A                                          |
|                                                                                                | Calidad de vida (SF-36)           | 5 ECA (812)                          | Alta                            | MD 3.26 más<br>(0.87 más a 5.64 más)       | N/A                                          |
|                                                                                                | Mejoría radiológica: Berlin score | 1 ECA (163)                          | Moderada                        | MD 3.1 menos<br>(4.6 menos a 1.6 menos)    | N/A                                          |
| Adaptada de ACR/SAA/SAPARTAN AS and nr-axSpA Treatment Guidelines Evidence Report 2018 Update. |                                   |                                      |                                 |                                            |                                              |
| Efectos deseables (beneficios de la opción a recomendar)                                       |                                   |                                      |                                 |                                            |                                              |
| ¿Qué tan sustanciales son los efectos deseables de la opción?                                  |                                   |                                      |                                 |                                            |                                              |

Efectos deseables (beneficios de la opción a recomendar)

¿Qué tan sustanciales son los efectos deseables de la opción?

| JUICIO                                                                                                                                     | EVIDENCIA DE LA INVESTIGACION                                                                                                                                                                                                                                                                                                                                                                                                                                                                                                                                                                                                                                                                                                                                                                                                          | CONSIDERACIONES ADICIONALES     |                                        |                                              |                 |                                              |                               |              |      |                       |                       |                               |    |    |    |    |       |              |          |                                        |     |  |
|--------------------------------------------------------------------------------------------------------------------------------------------|----------------------------------------------------------------------------------------------------------------------------------------------------------------------------------------------------------------------------------------------------------------------------------------------------------------------------------------------------------------------------------------------------------------------------------------------------------------------------------------------------------------------------------------------------------------------------------------------------------------------------------------------------------------------------------------------------------------------------------------------------------------------------------------------------------------------------------------|---------------------------------|----------------------------------------|----------------------------------------------|-----------------|----------------------------------------------|-------------------------------|--------------|------|-----------------------|-----------------------|-------------------------------|----|----|----|----|-------|--------------|----------|----------------------------------------|-----|--|
| <div><div>o Triviales</div><div>o Pequeños</div><div>o Moderados</div><div>o Grandes</div><div>o Varían</div><div>o No se sabe</div></div> | <div>2. Secukinumab vs placebo para mejorar desenlaces en adultos con espondilitis anquilosante activa a pesar de tratamiento con AINEs.</div> <table><tr><th>Desenlaces</th><th>Nº de estudios (nº de participantes)</th><th>Certeza de la evidencia (GRADE)</th><th>Efecto (95% CI)</th><th>Diferencia Absoluta (% Expuestos vs Control)</th></tr><tr><td>Pacientes que alcanzan ASAS20</td><td>4 ECAs (724)</td><td>Alta</td><td>OR 3.24 (2.38 ; 4.41)</td><td>28.4% (60.3%vs 31.9%)</td></tr><tr><td>Pacientes que alcanzan ASAS40</td><td>SD</td><td>SD</td><td>SD</td><td>SD</td></tr><tr><td>BASFI</td><td>1 ECAs (247)</td><td>Moderada</td><td>MD 1.4 menos (1.45 menos a 1.35 menos)</td><td>N/A</td></tr></table> <div>Adaptada de ACR/SAA/SAPARTAN AS and nr-axSpA Treatment Guidelines Evidence Report 2019 Update.</div> | Desenlaces                      | Nº de estudios (nº de participantes)   | Certeza de la evidencia (GRADE)              | Efecto (95% CI) | Diferencia Absoluta (% Expuestos vs Control) | Pacientes que alcanzan ASAS20 | 4 ECAs (724) | Alta | OR 3.24 (2.38 ; 4.41) | 28.4% (60.3%vs 31.9%) | Pacientes que alcanzan ASAS40 | SD | SD | SD | SD | BASFI | 1 ECAs (247) | Moderada | MD 1.4 menos (1.45 menos a 1.35 menos) | N/A |  |
| Desenlaces                                                                                                                                 | Nº de estudios (nº de participantes)                                                                                                                                                                                                                                                                                                                                                                                                                                                                                                                                                                                                                                                                                                                                                                                                   | Certeza de la evidencia (GRADE) | Efecto (95% CI)                        | Diferencia Absoluta (% Expuestos vs Control) |                 |                                              |                               |              |      |                       |                       |                               |    |    |    |    |       |              |          |                                        |     |  |
| Pacientes que alcanzan ASAS20                                                                                                              | 4 ECAs (724)                                                                                                                                                                                                                                                                                                                                                                                                                                                                                                                                                                                                                                                                                                                                                                                                                           | Alta                            | OR 3.24 (2.38 ; 4.41)                  | 28.4% (60.3%vs 31.9%)                        |                 |                                              |                               |              |      |                       |                       |                               |    |    |    |    |       |              |          |                                        |     |  |
| Pacientes que alcanzan ASAS40                                                                                                              | SD                                                                                                                                                                                                                                                                                                                                                                                                                                                                                                                                                                                                                                                                                                                                                                                                                                     | SD                              | SD                                     | SD                                           |                 |                                              |                               |              |      |                       |                       |                               |    |    |    |    |       |              |          |                                        |     |  |
| BASFI                                                                                                                                      | 1 ECAs (247)                                                                                                                                                                                                                                                                                                                                                                                                                                                                                                                                                                                                                                                                                                                                                                                                                           | Moderada                        | MD 1.4 menos (1.45 menos a 1.35 menos) | N/A                                          |                 |                                              |                               |              |      |                       |                       |                               |    |    |    |    |       |              |          |                                        |     |  |
| JUICIO                                                                                                                                     | EVIDENCIA DE LA INVESTIGACION                                                                                                                                                                                                                                                                                                                                                                                                                                                                                                                                                                                                                                                                                                                                                                                                          | CONSIDERACIONES ADICIONALES     |                                        |                                              |                 |                                              |                               |              |      |                       |                       |                               |    |    |    |    |       |              |          |                                        |     |  |

| Efectos Indeseables                                                                                                                  |                                                                                                                                                          |                                      |                                 |                       |                             |                                              |
|--------------------------------------------------------------------------------------------------------------------------------------|----------------------------------------------------------------------------------------------------------------------------------------------------------|--------------------------------------|---------------------------------|-----------------------|-----------------------------|----------------------------------------------|
| ¿Qué tan sustanciales son los efectos indeseables que se pueden anticipar?                                                           |                                                                                                                                                          |                                      |                                 |                       |                             |                                              |
| JUICIO                                                                                                                               | EVIDENCIA DE LA INVESTIGACION                                                                                                                            |                                      |                                 |                       | CONSIDERACIONES ADICIONALES |                                              |
| <div>○ Triviales</div> <div>○ Pequeños</div> <div>○ Moderados</div> <div>○ Grandes</div> <div>○ Varían</div> <div>○ No se sabe</div> | 1. iTNFa vs tratamiento sin iTNFa para mejorar desenlaces en adultos con espondilitis anquilosante activa a pesar de tratamiento con AINEs.              |                                      |                                 |                       |                             |                                              |
|                                                                                                                                      | Desenlaces                                                                                                                                               | Nº de estudios (nº de participantes) | Certeza de la evidencia (GRADE) | Efecto (95% CI)       |                             | Diferencia Absoluta (% Expuestos vs Control) |
|                                                                                                                                      | Eventos adversos graves                                                                                                                                  | 21 ECAs (4001)                       | Moderada                        | OR 1.02 (0.68 - 1.54) |                             | 0.3% (2.9%vs 2.6%)                           |
|                                                                                                                                      | Adaptada de ACR/SAA/SAPARTAN AS and nr-axSpA Treatment Guidelines Evidence Report 2019 Update.                                                           |                                      |                                 |                       |                             |                                              |
|                                                                                                                                      | 2. iTNFa vs tratamiento sin iTNFa para mejorar desenlaces en adultos con espondiloartritis axial no-radiológica activa a pesar de tratamiento con AINEs. |                                      |                                 |                       |                             |                                              |

|                                                                                                                                                                                                                                        | <table><tr><th>Desenlaces</th><th>Nº de estudios (nº de participantes)</th><th>Certeza de la evidencia (GRADE)</th><th>Efecto (95% CI)</th><th>Diferencia Absoluta (% Expuestos vs Control)</th></tr><tr><td>Eventos adversos graves</td><td>6 ECAs (1043)</td><td>Moderada</td><td>OR 1.03 (0.32 - 3.26)</td><td>0.1% (1.2%vs 1.3%)</td></tr></table> <p>Adaptada de ACR/SAA/SAPARTAN AS and nr-axSpA Treatment Guidelines Evidence Report 2019 Update.</p> <p>3. Secukinumab vs tratamiento sin secukinumab para mejorar desenlaces en adultos con espondilitis anquilosante activa a pesar de tratamiento con AINES_</p> <table><tr><th>Desenlaces</th><th>Nº de estudios (nº de participantes)</th><th>Certeza de la evidencia (GRADE)</th><th>Efecto (95% CI)</th><th>Diferencia Absoluta (% Expuestos vs Control)</th></tr><tr><td>Eventos adversos graves</td><td>4 ECAs (920)</td><td>Moderada</td><td>OR 0.76 (0.33 - 1.72)</td><td>0.3% (2.6%vs 2.8%)</td></tr></table> <p>Adaptada de ACR/SAA/SAPARTAN AS and nr-axSpA Treatment Guidelines Evidence Report 2019 Update.</p> | Desenlaces                                                                                                                                    | Nº de estudios (nº de participantes) | Certeza de la evidencia (GRADE)              | Efecto (95% CI) | Diferencia Absoluta (% Expuestos vs Control) | Eventos adversos graves | 6 ECAs (1043) | Moderada | OR 1.03 (0.32 - 3.26) | 0.1% (1.2%vs 1.3%) | Desenlaces | Nº de estudios (nº de participantes) | Certeza de la evidencia (GRADE) | Efecto (95% CI) | Diferencia Absoluta (% Expuestos vs Control) | Eventos adversos graves | 4 ECAs (920) | Moderada | OR 0.76 (0.33 - 1.72) | 0.3% (2.6%vs 2.8%) |  |
|----------------------------------------------------------------------------------------------------------------------------------------------------------------------------------------------------------------------------------------|-----------------------------------------------------------------------------------------------------------------------------------------------------------------------------------------------------------------------------------------------------------------------------------------------------------------------------------------------------------------------------------------------------------------------------------------------------------------------------------------------------------------------------------------------------------------------------------------------------------------------------------------------------------------------------------------------------------------------------------------------------------------------------------------------------------------------------------------------------------------------------------------------------------------------------------------------------------------------------------------------------------------------------------------------------------------------------------------|-----------------------------------------------------------------------------------------------------------------------------------------------|--------------------------------------|----------------------------------------------|-----------------|----------------------------------------------|-------------------------|---------------|----------|-----------------------|--------------------|------------|--------------------------------------|---------------------------------|-----------------|----------------------------------------------|-------------------------|--------------|----------|-----------------------|--------------------|--|
| Desenlaces                                                                                                                                                                                                                             | Nº de estudios (nº de participantes)                                                                                                                                                                                                                                                                                                                                                                                                                                                                                                                                                                                                                                                                                                                                                                                                                                                                                                                                                                                                                                                    | Certeza de la evidencia (GRADE)                                                                                                               | Efecto (95% CI)                      | Diferencia Absoluta (% Expuestos vs Control) |                 |                                              |                         |               |          |                       |                    |            |                                      |                                 |                 |                                              |                         |              |          |                       |                    |  |
| Eventos adversos graves                                                                                                                                                                                                                | 6 ECAs (1043)                                                                                                                                                                                                                                                                                                                                                                                                                                                                                                                                                                                                                                                                                                                                                                                                                                                                                                                                                                                                                                                                           | Moderada                                                                                                                                      | OR 1.03 (0.32 - 3.26)                | 0.1% (1.2%vs 1.3%)                           |                 |                                              |                         |               |          |                       |                    |            |                                      |                                 |                 |                                              |                         |              |          |                       |                    |  |
| Desenlaces                                                                                                                                                                                                                             | Nº de estudios (nº de participantes)                                                                                                                                                                                                                                                                                                                                                                                                                                                                                                                                                                                                                                                                                                                                                                                                                                                                                                                                                                                                                                                    | Certeza de la evidencia (GRADE)                                                                                                               | Efecto (95% CI)                      | Diferencia Absoluta (% Expuestos vs Control) |                 |                                              |                         |               |          |                       |                    |            |                                      |                                 |                 |                                              |                         |              |          |                       |                    |  |
| Eventos adversos graves                                                                                                                                                                                                                | 4 ECAs (920)                                                                                                                                                                                                                                                                                                                                                                                                                                                                                                                                                                                                                                                                                                                                                                                                                                                                                                                                                                                                                                                                            | Moderada                                                                                                                                      | OR 0.76 (0.33 - 1.72)                | 0.3% (2.6%vs 2.8%)                           |                 |                                              |                         |               |          |                       |                    |            |                                      |                                 |                 |                                              |                         |              |          |                       |                    |  |
| Certeza en la Evidencia                                                                                                                                                                                                                |                                                                                                                                                                                                                                                                                                                                                                                                                                                                                                                                                                                                                                                                                                                                                                                                                                                                                                                                                                                                                                                                                         |                                                                                                                                               |                                      |                                              |                 |                                              |                         |               |          |                       |                    |            |                                      |                                 |                 |                                              |                         |              |          |                       |                    |  |
| ¿Cuál es la certeza en la evidencia global sobre los efectos de la opción a recomendar?                                                                                                                                                |                                                                                                                                                                                                                                                                                                                                                                                                                                                                                                                                                                                                                                                                                                                                                                                                                                                                                                                                                                                                                                                                                         |                                                                                                                                               |                                      |                                              |                 |                                              |                         |               |          |                       |                    |            |                                      |                                 |                 |                                              |                         |              |          |                       |                    |  |
| JUICIO                                                                                                                                                                                                                                 | EVIDENCIA DE LA INVESTIGACION                                                                                                                                                                                                                                                                                                                                                                                                                                                                                                                                                                                                                                                                                                                                                                                                                                                                                                                                                                                                                                                           | CONSIDERACIONES ADICIONALES                                                                                                                   |                                      |                                              |                 |                                              |                         |               |          |                       |                    |            |                                      |                                 |                 |                                              |                         |              |          |                       |                    |  |
| <div><div><div><div></div><div>Muy baja</div></div><div><div></div><div>Baja</div></div><div><div></div><div>Moderada</div></div><div><div></div><div>Alta</div></div><div><div></div><div>No se identificaron</div></div></div></div> | <u>1. iTNFA</u>                                                                                                                                                                                                                                                                                                                                                                                                                                                                                                                                                                                                                                                                                                                                                                                                                                                                                                                                                                                                                                                                         | La evidencia sobre eventos adversos se califica como moderada debido a que se basa en menos de 300 observaciones del evento (debido a la baja |                                      |                                              |                 |                                              |                         |               |          |                       |                    |            |                                      |                                 |                 |                                              |                         |              |          |                       |                    |  |

| estudios                                                                                                                                                                                                                                                                                                    | <table><tr><th>Desenlaces</th><th>Importancia relativa</th><th>Certeza de la Evidencia GRADE</th></tr><tr><td>Control enfermedad por remisión/baja actividad de síntomas: ASAS20; ASAS40.</td><td>Crucial</td><td>ALTA</td></tr><tr><td>Eventos adversos</td><td>Crucial</td><td>MODERADA*</td></tr></table> |                               |                               | Desenlaces           | Importancia relativa          | Certeza de la Evidencia GRADE                                               | Control enfermedad por remisión/baja actividad de síntomas: ASAS20; ASAS40. | Crucial | ALTA             | Eventos adversos | Crucial  | MODERADA* | frecuencia, incluso menos del 1%, de eventos adversos serios reportada por los estudios. |
|-------------------------------------------------------------------------------------------------------------------------------------------------------------------------------------------------------------------------------------------------------------------------------------------------------------|--------------------------------------------------------------------------------------------------------------------------------------------------------------------------------------------------------------------------------------------------------------------------------------------------------------|-------------------------------|-------------------------------|----------------------|-------------------------------|-----------------------------------------------------------------------------|-----------------------------------------------------------------------------|---------|------------------|------------------|----------|-----------|------------------------------------------------------------------------------------------|
|                                                                                                                                                                                                                                                                                                             | Desenlaces                                                                                                                                                                                                                                                                                                   | Importancia relativa          | Certeza de la Evidencia GRADE |                      |                               |                                                                             |                                                                             |         |                  |                  |          |           |                                                                                          |
|                                                                                                                                                                                                                                                                                                             | Control enfermedad por remisión/baja actividad de síntomas: ASAS20; ASAS40.                                                                                                                                                                                                                                  | Crucial                       | ALTA                          |                      |                               |                                                                             |                                                                             |         |                  |                  |          |           |                                                                                          |
|                                                                                                                                                                                                                                                                                                             | Eventos adversos                                                                                                                                                                                                                                                                                             | Crucial                       | MODERADA*                     |                      |                               |                                                                             |                                                                             |         |                  |                  |          |           |                                                                                          |
| Adaptada de ACR/SAA/SAPARTAN AS and nr-axSpA Treatment Guidelines Evidence Report 2019 Update.                                                                                                                                                                                                              |                                                                                                                                                                                                                                                                                                              |                               |                               |                      |                               |                                                                             |                                                                             |         |                  |                  |          |           |                                                                                          |
| 2. Secukinumab                                                                                                                                                                                                                                                                                              |                                                                                                                                                                                                                                                                                                              |                               |                               |                      |                               |                                                                             |                                                                             |         |                  |                  |          |           |                                                                                          |
| <table><tr><th>Desenlaces</th><th>Importancia relativa</th><th>Certeza de la Evidencia GRADE</th></tr><tr><td>Control enfermedad por remisión/baja actividad de síntomas: ASAS20; ASAS40.</td><td>Crucial</td><td>ALTA</td></tr><tr><td>Eventos adversos</td><td>Crucial</td><td>MODERADA</td></tr></table> |                                                                                                                                                                                                                                                                                                              |                               | Desenlaces                    | Importancia relativa | Certeza de la Evidencia GRADE | Control enfermedad por remisión/baja actividad de síntomas: ASAS20; ASAS40. | Crucial                                                                     | ALTA    | Eventos adversos | Crucial          | MODERADA |           |                                                                                          |
| Desenlaces                                                                                                                                                                                                                                                                                                  | Importancia relativa                                                                                                                                                                                                                                                                                         | Certeza de la Evidencia GRADE |                               |                      |                               |                                                                             |                                                                             |         |                  |                  |          |           |                                                                                          |
| Control enfermedad por remisión/baja actividad de síntomas: ASAS20; ASAS40.                                                                                                                                                                                                                                 | Crucial                                                                                                                                                                                                                                                                                                      | ALTA                          |                               |                      |                               |                                                                             |                                                                             |         |                  |                  |          |           |                                                                                          |
| Eventos adversos                                                                                                                                                                                                                                                                                            | Crucial                                                                                                                                                                                                                                                                                                      | MODERADA                      |                               |                      |                               |                                                                             |                                                                             |         |                  |                  |          |           |                                                                                          |
| Adaptada de ACR/SAA/SAPARTAN AS and nr-axSpA Treatment Guidelines Evidence Report 2019 Update.                                                                                                                                                                                                              |                                                                                                                                                                                                                                                                                                              |                               |                               |                      |                               |                                                                             |                                                                             |         |                  |                  |          |           |                                                                                          |

Valores de los pacientes

¿Hay variación o poca certeza sobre cómo valoran las personas/los pacientes los desenlaces principales?

|                                                                 |                                                                                                                                                                                                                                                                    |                             |
|-----------------------------------------------------------------|--------------------------------------------------------------------------------------------------------------------------------------------------------------------------------------------------------------------------------------------------------------------|-----------------------------|
| JUICIO                                                          | EVIDENCIA DE LA INVESTIGACION                                                                                                                                                                                                                                      | CONSIDERACIONES ADICIONALES |
| o Variabilidad o incertidumbre importante<br>o Posiblemente hay | iTNFa:<br><br>Hay suficiente evidencia sobre la mejoría en escalas de funcionalidad, movilidad y bienestar general (desenlaces reportados por pacientes) asociada al uso de iTNFa en EspAax. Asimismo, la baja frecuencia de eventos adversos hace que sea inusual |                             |



|                                                                                                                                                                                                                                                                                                                                                                                                                       |                                                                                                                                                                                                                                                                                                                                                                                                                                                                                                                                                                                                                                                                                                                           |                                    |
|-----------------------------------------------------------------------------------------------------------------------------------------------------------------------------------------------------------------------------------------------------------------------------------------------------------------------------------------------------------------------------------------------------------------------|---------------------------------------------------------------------------------------------------------------------------------------------------------------------------------------------------------------------------------------------------------------------------------------------------------------------------------------------------------------------------------------------------------------------------------------------------------------------------------------------------------------------------------------------------------------------------------------------------------------------------------------------------------------------------------------------------------------------------|------------------------------------|
| <p>variabilidad o incertidumbre importante</p> <p><input type="radio"/> Posiblemente No hay variabilidad o incertidumbre importante</p> <p><input type="radio"/> No hay variabilidad o incertidumbre importante</p>                                                                                                                                                                                                   | <p>la suspensión de los mismos. Un estudio evaluó mensajes de redes sociales que hicieran mención de estos medicamentos en EspAax y reportó que las principales quejas respecto a los iTNFa consisten en su modo de aplicación (intravenoso o subcutáneo) y la frecuencia necesaria de dicha administración.</p> <p>Secukinumab:</p> <p>Un estudio identificó que la mayoría de los pacientes estaban satisfechos con el tratamiento con secukinumab. 99% de satisfacción respecto a la mejoría de síntomas, 97% respecto a velocidad en la mejoría de los síntomas, 96% en la frecuencia de administración el secukinumab, 91.5% respecto al método de administración y 93,5% acerca de la facilidad de uso (93.5%).</p> |                                    |
| <p><b>Balance de los efectos</b></p> <p>¿El balance entre los efectos deseables e indeseables favorece la opción o el comparador?</p>                                                                                                                                                                                                                                                                                 |                                                                                                                                                                                                                                                                                                                                                                                                                                                                                                                                                                                                                                                                                                                           |                                    |
| <b>JUICIO</b>                                                                                                                                                                                                                                                                                                                                                                                                         | <b>EVIDENCIA DE LA INVESTIGACION</b>                                                                                                                                                                                                                                                                                                                                                                                                                                                                                                                                                                                                                                                                                      | <b>CONSIDERACIONES ADICIONALES</b> |
| <p><input type="radio"/> Favorece al comparador</p> <p><input type="radio"/> Probablemente favorece al comparador</p> <p><input type="radio"/> No favorece al comparador ni a la opción en evaluación</p> <p><input type="radio"/> Probablemente favorece a la opción</p> <p><input checked="" type="radio"/> Favorece la intervención</p> <p><input type="radio"/> Varía</p> <p><input type="radio"/> No se sabe</p> | <p>El balance de los efectos deseables e indeseables a partir de la evidencia evaluada favorece el uso de la intervención.</p>                                                                                                                                                                                                                                                                                                                                                                                                                                                                                                                                                                                            |                                    |

| Recursos necesarios                                                                                                                                                                                                                                                                                           |                                                                                                                                                                                                                                                                                                                                                                                                                                                                                                                                                                                                              |                             |
|---------------------------------------------------------------------------------------------------------------------------------------------------------------------------------------------------------------------------------------------------------------------------------------------------------------|--------------------------------------------------------------------------------------------------------------------------------------------------------------------------------------------------------------------------------------------------------------------------------------------------------------------------------------------------------------------------------------------------------------------------------------------------------------------------------------------------------------------------------------------------------------------------------------------------------------|-----------------------------|
| ¿Qué tan grandes son los gastos monetarios necesarios?                                                                                                                                                                                                                                                        |                                                                                                                                                                                                                                                                                                                                                                                                                                                                                                                                                                                                              |                             |
| JUICIO                                                                                                                                                                                                                                                                                                        | EVIDENCIA DE LA INVESTIGACION                                                                                                                                                                                                                                                                                                                                                                                                                                                                                                                                                                                | CONSIDERACIONES ADICIONALES |
| <input type="radio"/> Grandes costos<br><input checked="" type="radio"/> Costos moderados<br><input type="radio"/> no significantes costos ni ahorros<br><input type="radio"/> Moderados ahorros<br><input type="radio"/> Grandes ahorros<br><input type="radio"/> Varían<br><input type="radio"/> No se sabe | <p>Los costos asociados a terapia biológica con iTNFa se ha estimado entre €10 000 y €12 000 anuales, con costos por respondedor entre €40 000 y €70 000 según el medicamento evaluado. En cuanto a costo incremental, los iTNFa tienen ICER entre £19,240 y £40,576 por QALY.</p> <p>Varias evaluaciones económicas recientes coinciden en señalar a secukinumab (anti-IL17A) como el medicamento con el mejor balance de costos y beneficios, por ser consistentemente menos costoso y asociarse a mayor utilidad que otros iTNFa, por lo que su implementación puede suponer una reducción de costos.</p> |                             |

| Equidad                                                                                                                                                                                                                                                                                                                   |                                                                                                                                  |                             |
|---------------------------------------------------------------------------------------------------------------------------------------------------------------------------------------------------------------------------------------------------------------------------------------------------------------------------|----------------------------------------------------------------------------------------------------------------------------------|-----------------------------|
| ¿La implementación de la opción, tendrá impacto en la equidad?                                                                                                                                                                                                                                                            |                                                                                                                                  |                             |
| JUICIO                                                                                                                                                                                                                                                                                                                    | EVIDENCIA DE LA INVESTIGACION                                                                                                    | CONSIDERACIONES ADICIONALES |
| <input type="radio"/> Reduce<br><input type="radio"/> Probablemente se reduce la equidad<br><input type="radio"/> Probablemente no impacta la equidad<br><input type="radio"/> Probablemente incrementa<br><input type="radio"/> Incrementa<br><input type="radio"/> Varia<br><input checked="" type="radio"/> No se sabe | <p>No se encontraron estudios que discutieran efectos sobre la equidad entorno al manejo de pacientes con espondiloartritis.</p> |                             |

| Aceptabilidad                                                                                                                                                                                                          |                                                                                                                                                                                                                                                                                                                                                                                                                                                                                                                                                                                                                                                  |                             |
|------------------------------------------------------------------------------------------------------------------------------------------------------------------------------------------------------------------------|--------------------------------------------------------------------------------------------------------------------------------------------------------------------------------------------------------------------------------------------------------------------------------------------------------------------------------------------------------------------------------------------------------------------------------------------------------------------------------------------------------------------------------------------------------------------------------------------------------------------------------------------------|-----------------------------|
| ¿Es la opción aceptada por los diferentes actores involucrados en su implementación?                                                                                                                                   |                                                                                                                                                                                                                                                                                                                                                                                                                                                                                                                                                                                                                                                  |                             |
| JUICIO                                                                                                                                                                                                                 | EVIDENCIA DE LA INVESTIGACION                                                                                                                                                                                                                                                                                                                                                                                                                                                                                                                                                                                                                    | CONSIDERACIONES ADICIONALES |
| <input type="radio"/> No<br><input type="radio"/> Probablemente no<br><input type="radio"/> Probablemente si<br><input checked="" type="radio"/> Si<br><input type="radio"/> Varia<br><input type="radio"/> No se sabe | <p>La aceptabilidad de los iTNFa es alta debido a su efecto satisfactorio sobre control de la enfermedad y baja frecuencia de eventos adversos. Sin embargo, su efecto sobre manifestaciones extraarticulares y riesgo de infecciones (como tuberculosis) pueden limitar su indicación en algunos subgrupos de pacientes.</p> <p>Tanto los pacientes como los expertos clínicos expresan satisfacción de contar con secukinumab como nueva alternativa dado su mecanismo de acción diferente y su efecto sobre la psoriasis, artritis psoriásica, uveítis; que ofrece más opciones para lograr el manejo adecuado de pacientes individuales.</p> |                             |
| Factibilidad                                                                                                                                                                                                           |                                                                                                                                                                                                                                                                                                                                                                                                                                                                                                                                                                                                                                                  |                             |
| ¿Es la opción factible de IMPLEMENTAR?                                                                                                                                                                                 |                                                                                                                                                                                                                                                                                                                                                                                                                                                                                                                                                                                                                                                  |                             |
| JUICIO                                                                                                                                                                                                                 | EVIDENCIA DE LA INVESTIGACION                                                                                                                                                                                                                                                                                                                                                                                                                                                                                                                                                                                                                    | CONSIDERACIONES ADICIONALES |
| <input type="radio"/> No<br><input type="radio"/> Probablemente no<br><input type="radio"/> Probablemente si<br><input type="radio"/> Si<br><input type="radio"/> Varia<br><input checked="" type="radio"/> No se sabe | <p>No se encontraron estudios de factibilidad de pacientes en espondiloartritis con relación a la implementación de estos medicamentos (más allá de los costos).</p>                                                                                                                                                                                                                                                                                                                                                                                                                                                                             |                             |

## Resumen de Juicios

|                         | JUICIOS                                 |                                                      |                                                              |                                            |                            |       |                     |
|-------------------------|-----------------------------------------|------------------------------------------------------|--------------------------------------------------------------|--------------------------------------------|----------------------------|-------|---------------------|
| PROBLEMA                | No                                      | Probablemente no                                     | Probablemente si                                             | Si                                         |                            | Varia | No se sabe          |
| EFFECTOS DESEABLES      | Trivial                                 | Pequeño                                              | Moderado                                                     | Grande                                     |                            | Varia | No se sabe          |
| EFFECTOS INDESEABLES    | Grande                                  | Moderado                                             | Pequeño                                                      | Trivial                                    |                            | Varia | No se sabe          |
| CERTEZA EN LA EVIDENCIA | Muy Bajo                                | Bajo                                                 | Moderado                                                     | Alto                                       |                            |       | No incluyó estudios |
| VALORES DE PACIENTES    | Importante incertidumbre o variabilidad | Posiblemente importante incertidumbre o variabilidad | Probablemente no hay importante incertidumbre o variabilidad | No importante incertidumbre o variabilidad |                            |       |                     |
| BALANCE DE LOS EFECTOS  | Favorece al comparador                  | Probablemente Favorece al comparador                 | No favorece ni a la intervención ni al comparador            | Probablemente favorece a la intervención   | Favorece a la intervención | Varia | No se sabe          |
| RECURSOS REQUERIDOS     | Grandes costos                          | Moderados costos                                     | Costos y ahorros insignificantes                             | Moderados ahorros                          | Grandes ahorros            | Varia | No se sabe          |
| EQUIDAD                 | Reducida                                | Probablemente reducida                               | Probablemente no impactada                                   | Probablemente incrementada                 | Incrementada               | Varia | No se sabe          |
| ACEPTABILIDAD           | No                                      | Probablemente no                                     | Probablemente si                                             | Si                                         |                            | Varia | No se sabe          |
| FACTIBILIDAD            | No                                      | Probablemente no                                     | Probablemente si                                             | Si                                         |                            | Varia | No se sabe          |

## Tipo de Recomendación

|                                             |                                                  |                                                                           |                                                |                                           |
|---------------------------------------------|--------------------------------------------------|---------------------------------------------------------------------------|------------------------------------------------|-------------------------------------------|
| Recomendación fuerte en contra de la opción | Recomendación condicional en contra de la opción | Recomendación condicional a favor de cualquiera la opción o su comparador | Recomendación condicional a favor de la opción | Recomendación fuerte a favor de la opción |
| ○                                           | ○                                                | ○                                                                         | ○                                              | ○                                         |

## Conclusiones

### Recomendación

En pacientes con EspAax que presentan falla terapéutica o intolerancia farmacológica a AINEs, se recomienda el inicio de terapia con un iTNFa o con un anti L17A

Recomendación fuerte a favor de la intervención. Certeza de la evidencia alta

### Punto de Buena Práctica

El panel recomienda preferiblemente la elección de secukinumab sobre el cual hay mayor evidencia que soporta su uso.

### Justificación

La evidencia sobre el beneficio y seguridad de iTNFa es de calidad alta. La evidencia sobre secukinumab respecto a beneficios es alta, sin embargo, debido a imprecisión en la medición de eventos adversos (frecuencias menores a 1%) la calidad de la evidencia se considera moderada. Los costos y demás consideraciones entorno a las intervenciones también favorecen esta recomendación.

### Consideraciones por subgrupos

En caso de contraindicación para el uso de iTNFa, las guías revisadas recomiendan considerar el motivo de contraindicación para la elección de terapia adecuada. Si la contraindicación para iTNFa es por enfermedad cardíaca congestiva o enfermedades desmielinizantes, se debe optar por los anti-IL17A secukinumab e ixekizumab pues no se ha observado que afecten comorbilidades de este tipo. Sin embargo, si la contraindicación para iTNFa es por el riesgo de tuberculosis, infecciones recurrentes, se debe optar por usar sulfazalasina, en lugar de ixekizumab, secukinumab o tofacitinib, aunque debería intentarse mitigar el riesgo para poder ofrecer esta opción.

### Consideraciones de implementación

No se identificaron consideraciones relevantes para la implementación de la recomendación.

### Monitoreo y evaluación de cumplimiento

Tanto para iTNFa como para secukinumab, debe cumplirse con seguimiento de los pacientes y evaluación de respuesta, que de ser menor a 20% luego de un periodo de tratamiento adecuado (24-52 semanas) debe llevar a suspensión del medicamento e inicio de tratamiento con otra molécula de la misma u otra clase, considerando características individuales de los pacientes.

### Prioridades de investigación futura

Se deben conducir experimentos clínicos aleatorizados que comparen en paralelo el efecto de medicamentos de las clases Inhibidores iTNFa; anti IL-17A; anti-IL12-23; inhibidores JAK para contar con evidencia directa que permita identificar la mejor opción para el **TRATAMIENTO** de EspAax. En su defecto, serán útiles revisiones sistemáticas que usen estrategias de comparación indirecta (como metaanálisis en red) e incluyan ECAs de todas las moléculas disponibles para el tratamiento de EA y EspAax-NR. Es necesario conducir estudios económicos que comparen las alternativas más efectivas y seguras para identificar los medicamentos con mejores balances de beneficios y costos.

Se debe explorar también si subgrupos de EspAax, como la EspAax-nr, o EspAax asociada a psoriasis, uveítis o EII, se benefician de moléculas diferentes a las que parecen ser adecuadas en EA.

Es crucial que se desarrollen estudios con seguimiento a largo plazo para determinar si el uso de terapia biológica, y en especial de estas nuevas moléculas, se asocia con mayor riesgo de otras enfermedades, en especial con mayor riesgo de ciertos tipos de neoplasias o trastornos de inmunidad.

## Tablas GRADE

1. iTNFa vs tratamiento sin iTNFa para mejorar desenlaces en adultos con espondilitis anquilosante activa a pesar de tratamiento con AINES  
(3)

| Desenlaces                        | Nº de estudios (nº de participantes) | Efecto                    | Diferencia Absoluta<br>(% Expuestos vs Control) | Certeza de la evidencia | Juicios                                                                                 |
|-----------------------------------|--------------------------------------|---------------------------|-------------------------------------------------|-------------------------|-----------------------------------------------------------------------------------------|
|                                   |                                      | (95% CI)                  |                                                 | (GRADE)                 |                                                                                         |
| Pacientes que alcanzan ASAS20     | 19 ECAs (3430)                       | OR 3.99                   | 33,50%                                          | Alta                    | N/A                                                                                     |
|                                   |                                      | (3.27 - 4.88)             | (65.2%vs 31.7%)                                 |                         |                                                                                         |
| Pacientes que alcanzan ASAS40     | 12 ECAs (2526)                       | OR 4.34                   | 30.6%<br>(50.8%vs20.2%)                         | Alta                    | N/A                                                                                     |
|                                   |                                      | (3.25 ; - 5.81)           |                                                 |                         |                                                                                         |
| BASFI                             | 17 ECAs (2672)                       | MD 4.37 menos             | N/A                                             | Alta                    | N/A                                                                                     |
|                                   |                                      | (7.85 menos a 0.89 menos) |                                                 |                         |                                                                                         |
| Calidad de vida (SF-36)           | 5 ECA (812)                          | MD 3.26 más               | N/A                                             | Alta                    | N/A                                                                                     |
|                                   |                                      | (0.87 más a 5.64 más)     |                                                 |                         |                                                                                         |
| Mejoría radiológica: Berlín score | 1 ECA (163)                          | MD 3.1 menos              | N/A                                             | Moderada                | a) Solo un estudio disponible, número de participantes moderado da lugar a imprecisión. |



| Desenlaces              | Nº de estudios (nº de participantes) | Efecto                  | Diferencia Absoluta<br>(% Expuestos vs Control) | Certeza de la evidencia | Juicios                                                              |
|-------------------------|--------------------------------------|-------------------------|-------------------------------------------------|-------------------------|----------------------------------------------------------------------|
|                         |                                      | (95% CI)                |                                                 | (GRADE)                 |                                                                      |
|                         |                                      |                         |                                                 |                         |                                                                      |
|                         |                                      | (4.6 menos a 1.6 menos) |                                                 |                         |                                                                      |
| Eventos adversos graves | 21 ECAs (4001)                       | OR 1.02                 | 0.3% (2.9%vs 2.6%)                              | Moderada                | a) Imprecisión por IC95% amplio, y que atraviesa línea de no efecto. |
|                         |                                      | (0.68 - 1.54)           |                                                 |                         |                                                                      |

2. iTNFa vs tratamiento sin iTNFa para mejorar desenlaces en adultos con espondiloartritis axial no-radiográfica activa a pesar de tratamiento con AINEs (3)

| Desenlaces                    | Nº de estudios (nº de participantes) | Efecto relativo | Diferencia Absoluta<br>(Expuestos vs Control) | Certeza de la evidencia | Juicios |
|-------------------------------|--------------------------------------|-----------------|-----------------------------------------------|-------------------------|---------|
|                               |                                      | (95% CI)        |                                               | (GRADE)                 |         |
| Pacientes que alcanzan ASAS20 | 5 ECAs (788)                         | OR 3.99         | 33,50%                                        | Alta                    | N/A     |
|                               |                                      | (3.27 ; 4.88)   | (65.2%vs 31.7%)                               |                         |         |
| Pacientes que alcanzan ASAS40 | SD                                   | SD              | SD                                            | SD                      | N/A     |
| BASFI                         | 5 ECAs (633)                         | MD 1.41 menos   | N/A                                           | Alta                    | N/A     |

| Desenlaces                        | Nº de estudios (nº de participantes) | Efecto relativo           | Diferencia Absoluta (Expuestos vs Control) | Certeza de la evidencia | Juicios                                                                                       |
|-----------------------------------|--------------------------------------|---------------------------|--------------------------------------------|-------------------------|-----------------------------------------------------------------------------------------------|
|                                   |                                      | (95% CI)                  |                                            | (GRADE)                 |                                                                                               |
|                                   |                                      | (2.49 menos a 0.33 menos) |                                            |                         |                                                                                               |
| Calidad de vida (SF-36)           | 3 ECA (445)                          | MD 2.63 más               | N/A                                        | Alta                    | N/A                                                                                           |
|                                   |                                      | (0.2 más a 5.06 más)      |                                            |                         |                                                                                               |
| Mejoría radiológica: SPARCC score | 1 ECA (208)                          | SMD 0.90 menos            | N/A                                        | Moderada                | a) Un solo estudio disponible.                                                                |
|                                   |                                      | (2.29 menos a 0.49 menos) |                                            |                         |                                                                                               |
| Eventos adversos graves           | 6 ECAs (1043)                        | Moderada                  | OR 1.03                                    | 0.1% (1.2%vs 1.3%)      | a) Pocos eventos observados, el IC95% es amplio y no permite certeza sobre si hay diferencia. |
|                                   |                                      |                           | (0.32 - 3.26)                              |                         |                                                                                               |

### 3. Secukinumab vs placebo para mejorar desenlaces en adultos con espondilitis anquilosante activa a pesar de tratamiento con AINEs (3)

| Desenlaces                    | Nº de estudios (nº de participantes) | Efecto        | Diferencia Absoluta (% Expuestos vs Control) | Certeza de la evidencia | Juicios |
|-------------------------------|--------------------------------------|---------------|----------------------------------------------|-------------------------|---------|
|                               |                                      | (95% CI)      |                                              | (GRADE)                 |         |
| Pacientes que alcanzan ASAS20 | 4 ECAs (724)                         | OR 3.24       | 28,40%                                       | Alta                    | N/A     |
|                               |                                      | (2.38 ; 4.41) | (60.3%vs 31.9%)                              |                         |         |

|                               | Nº de estudios (nº de participantes) | Efecto                    | Diferencia Absoluta (% Expuestos vs Control) | Certeza de la evidencia | Juicios                                                           |
|-------------------------------|--------------------------------------|---------------------------|----------------------------------------------|-------------------------|-------------------------------------------------------------------|
| Desenlaces                    |                                      | (95% CI)                  |                                              | (GRADE)                 |                                                                   |
| Pacientes que alcanzan ASAS40 | SD                                   | SD                        | SD                                           | SD                      | N/A                                                               |
| BASFI                         | 1 ECAs (247)                         | MD 1.4 menos              | N/A                                          | Moderada                | a) Solo un estudio disponible, número de participantes moderado   |
|                               |                                      | (1.45 menos a 1.35 menos) |                                              |                         |                                                                   |
| Eventos adversos graves       | 4 ECAs (920)                         | Moderada                  | OR 0.76                                      | 0.3% (2.6%vs 2.8%)      | a) Imprecisión por IC95% amplio que atraviesa línea de no-efecto. |
|                               |                                      |                           | (0.33 - 1.72)                                |                         |                                                                   |

## Referencias:

1. McAllister K, Goodson N, Warburton L, Rogers G. Spondyloarthritis: Diagnosis and management: Summary of NICE guidance. *BMJ*. 2017;356:1–5.
2. Baraliakos X, Kiltz U, Peters S, Appel H, Dybowski F, Igelmann M, et al. Efficiency of treatment with non-steroidal anti-inflammatory drugs according to current recommendations in patients with radiographic and non-radiographic axial spondyloarthritis. *Rheumatology (Oxford)*. 2017;56(1):95–102.
3. Ward MM, Deodhar A, Gensler LS, Dubreuil M, Yu D, Khan MA, et al. 2019 Update of the American College of Rheumatology/Spondylitis Association of America/Spondyloarthritis Research and Treatment Network Recommendations for the Treatment of Ankylosing Spondylitis and Nonradiographic Axial Spondyloarthritis. *Arthritis Rheumatol*. 2019;71(10):1599–613.
4. van der Heijde D, Cheng-Chung Wei J, Dougados M, Mease P, Deodhar A, Maksymowych WP, et al. Ixekizumab, an interleukin-17A antagonist in the treatment of ankylosing spondylitis or radiographic axial spondyloarthritis in patients previously untreated with biological disease-modifying anti-rheumatic drugs (COAST-V): 16 week results of a phase 3 randomised, double-blind, placebo-controlled trial. *Lancet*. 2018;392(10163):2441–51.
5. Ungprasert P, Erwin PJ, Koster MJ. Indirect comparisons of the efficacy of biological agents in patients with active ankylosing spondylitis: a systematic review and meta-analysis. *Clin Rheumatol*. 2017;36(7):1569–77.
6. Deodhar A, Blanco R, Dokoupilova E, Sande M Van De, Hall S, Wiksten A, et al. Secukinumab 150 mg Significantly Improved Signs and Symptoms of Non-radiographic Axial Spondyloarthritis : Results from a Phase 3 Double-blind , Randomized , Placebo-controlled Study Introduction ¶ PREVENT is a phase 3 study evaluating secukinumab 150 mg . 2019;1–11.
7. Deodhar A, van der Heijde D, Gensler LS, Kim TH, Maksymowych WP, Østergaard M, et al. Ixekizumab for patients with non-radiographic axial spondyloarthritis (COAST-X): a randomised, placebo-controlled trial. *Lancet*. 2020;395(10217):53–64.
8. van der Heijde D, Baraliakos X, Gensler LS, Maksymowych WP, Tseluyko V, Nadashkevich O, et al. Efficacy and safety of filgotinib, a selective Janus kinase 1 inhibitor, in patients with active ankylosing spondylitis (TORTUGA): results from a randomised, placebo-controlled, phase 2 trial. *Lancet [Internet]*. 2018;392(10162):2378–87. Available from: [http://dx.doi.org/10.1016/S0140-6736\(18\)32463-2](http://dx.doi.org/10.1016/S0140-6736(18)32463-2)
9. Van Der Heijde D, Deodhar A, Wei JC, Drescher E, Fleishaker D, Hendrikx T, et al. Tofacitinib in patients with ankylosing spondylitis: A phase II, 16-week, randomised, placebo-controlled, dose-ranging study. *Ann Rheum Dis*. 2017;76(8):1340–7.
10. van der Heijde D, Song IH, Pangan AL, Deodhar A, van den Bosch F, Maksymowych WP, et al. Efficacy and safety of upadacitinib in patients with active ankylosing spondylitis (SELECT-AXIS 1): a multicentre, randomised, double-blind, placebo-controlled, phase 2/3 trial. *Lancet*. 2019;394(10214):2108–17.

11. Deodhar A, Gensler LS, Sieper J, Clark M, Calderon C, Wang Y, et al. Three Multicenter, Randomized, Double-Blind, Placebo-Controlled Studies Evaluating the Efficacy and Safety of Ustekinumab in Axial Spondyloarthritis. *Arthritis Rheumatol*. 2019;71(2):258–70.
12. Lee YH, Song GG. Comparative Efficacy and Safety of Peficitinib 25, 50, 100, and 150 mg in Patients with Active Rheumatoid Arthritis: A Bayesian Network Meta-Analysis of Randomized Controlled Trials. *Clin Drug Investig*. 2020;40(1):65–72.
13. Garrido-Cumbrera M, Gálvez-Ruiz D, Gratacós J, Blanch Mur C, Navarro-Compán V. AB0875 Quality of life improvement in patients with axial spondyloarthritis treated with nsaid and biological therapy from the patient's perspective: results from the atlas-2017. *Ann Rheum Dis* [Internet]. 2018 Jun 1;77(Suppl 2):1564 LP – 1565. Available from: [http://ard.bmj.com/content/77/Suppl\\_2/1564.3.abstract](http://ard.bmj.com/content/77/Suppl_2/1564.3.abstract)
14. Maxwell LJ, Zochling J, Boonen A, Singh JA, Veras MMS, Tanjong Ghogomu E, et al. TNF-alpha inhibitors for ankylosing spondylitis. *Cochrane Database Syst Rev*. 2015;2015(4).
15. Deodhar A, Mease PJ, McInnes IB, Baraliakos X, Reich K, Blauvelt A, et al. Long-term safety of secukinumab in patients with moderate-to-severe plaque psoriasis, psoriatic arthritis, and ankylosing spondylitis: Integrated pooled clinical trial and post-marketing surveillance data. *Arthritis Res Ther*. 2019;21(1):1–11.
16. Prince DS, Mcguigan LE, McGirr EE. Working life and physical activity in ankylosing spondylitis pre and post anti-tumor necrosis factor-alpha therapy. *Int J Rheum Dis*. 2014;17(2):165–72.
17. Purmonen T, Puolakka K, Mishra D, Gunda P, Martikainen J. Cost-effectiveness of secukinumab compared to other biologics in the treatment of ankylosing spondylitis in Finland. *Clin Outcomes Res*. 2019;11:159–68.
18. Corbett M, Soares M, Jhuti G, Rice S, Spackman E, Sideris E, et al. Tumour necrosis factor- $\alpha$  inhibitors for ankylosing spondylitis and non-radiographic axial spondyloarthritis: A systematic review and economic evaluation. *Health Technol Assess (Rockv)*. 2016;20(9):333.
19. Olivieri I, Fanizza C, Gilio M, Ravasio R. Efficacy, safety and cost per responder of biologics in the treatment of non-radiographic axial spondyloarthritis. *Clin Exp Rheumatol*. 2016;34(5):935–40.
20. Goeree R, Chiva-Razavi S, Gunda P, Jain M, Jugl SM. Cost-effectiveness analysis of secukinumab in ankylosing spondylitis from the Canadian perspective. *J Med Econ* [Internet]. 2019;22(1):45–52. Available from: <http://dx.doi.org/10.1080/13696998.2018.1539400>
21. Romero Prada ME, Roa Cardenas NC, Serrano GY, Huerfano LM. Cost-Utility Analysis of Secukinumab use Versus Tnf- $\alpha$  Inhibitors, in Patients with Ankylosing Spondylitis. *Value Heal* [Internet]. 2017 Oct 1;20(9):A938–9. Available from: <https://doi.org/10.1016/j.jval.2017.08.2980>
22. Afanador Echeverri GF, Garcés W. PSY3 SECUKINUMAB VS ADALIMUMAB E INFLIXIMAB PARA EL TRATAMIENTO DE ESPONDILITIS ANQUILOSANTE: UN ANÁLISIS DE COSTO POR RESPONDEDOR A LA SEMANA 24 DESDE UNA PERSPECTIVA COLOMBIANA. *Value Heal Reg Issues* [Internet]. 2019 Oct 1;19:S80. Available from: <https://doi.org/10.1016/j.vhri.2019.08.445>

## Pregunta 8:

¿En pacientes adultos con Espondiloartritis Axial (EspAax) que han fallado a primera línea de tratamiento biológico con un Anti TNF, cuál medicamento/biológico se debe usar como siguiente opción de tratamiento por su efectividad (control enfermedad, remisión/baja actividad de síntomas) y seguridad (eventos adversos)?

|                     |                                                                                                                 |
|---------------------|-----------------------------------------------------------------------------------------------------------------|
| <b>Población</b>    | Pacientes con espondiloartritis axial (EspAax) que han fallado al tratamiento con anti TNF                      |
| <b>Intervención</b> | anti -IL17A                                                                                                     |
| <b>Comparación</b>  | Cuidado estándar/placebo                                                                                        |
| <b>Desenlaces</b>   | Efectividad: control enfermedad<br>remisión/baja actividad de síntomas<br>Perfil de seguridad: Eventos adversos |

### Antecedentes

La EspAax es una enfermedad reumática inflamatoria crónica que puede presentar dos formas, una con compromiso predominantemente axial y otra con compromiso predominantemente periférico. La EspAax Axial abarca la espondilitis anquilosante con signos radiológicos de sacroileítis, y un tipo sin sacroileítis radiográfica, conocida como "Espondiloartritis axial no radiográfica (EspAax-nr)" (1).

En el manejo de la espondilitis anquilosante (EA), los antiinflamatorios no esteroideos (AINES) han sido considerados la primera línea de manejo para el control de síntomas, pero en aquellos pacientes que continúan activos a pesar del manejo con AINES el manejo con inhibidores del factor de necrosis tumoral (anti-TNF) ha impactado de forma significativa el control de la enfermedad (2). En la actualidad, hay varias terapias anti-TNF disponibles y cuando un paciente con EA no responde a un anti TNF, estudios han demostrado que cambiar a uno anti-TNF alternativo es una decisión terapéutica clínicamente razonable, incluso si el segundo anti-TNF falla (2). Sin embargo, también se ha demostrado que hasta un 40% de los pacientes no responden (fallan a tratamiento primario o secundario) o no toleran estos medicamentos (2). Entre las nuevas opciones terapéuticas se encuentran los inhibidores de la IL-17, como el secukinumab, un anticuerpo monoclonal isotipo IgG1/k inhibidor de la IL-17A por medio de la cual inhibe su interacción con el receptor de IL-17 y la liberación de citoquinas y quimoquinas (3).

Los datos de los ensayos clínicos que se han comunicado recientemente en distintas publicaciones o presentado en los últimos congresos de reumatología, han sugerido que en comparación con placebo, los inhibidores de la IL-17 son eficaces en el control de signos y síntomas de la artritis psoriásica en pacientes con enfermedad activa a pesar del tratamiento previo con fármacos antiinflamatorios no esteroideos, fármacos reumáticos modificadores de la enfermedad o inhibidores del factor de necrosis tumoral alfa (anti-TNF $\alpha$ ). (4,5)

Aquí se revisa la evidencia sobre su potencial beneficio en el tratamiento de la espondiloartritis axial con el fin de generar una recomendación sobre su uso en esta entidad.

#### Evidencia

Inhibidor de IL-17A Secukinumab en pacientes que han fallado al tratamiento con un anti TNF.

La búsqueda de la literatura realizada (ver anexo-Excel) no identificó ningún estudio que haya evaluado los inhibidores IL-17A en pacientes con espondiloartritis axial que fallan a la terapia inicial con anti-TNF. Se identificaron los estudios MESURE 1 a 4; estudios de fase III, conducidos con el fin de evaluar el efecto de secukinumab a diferentes dosis sobre signos y síntomas clínicos y cambios radiográficos en pacientes con espondilitis anquilosante. Los resultados de estos estudios han generado varias publicaciones en diferentes puntos del seguimiento (6-14). Dos de estas publicaciones (8,11) presentan análisis de subgrupos para pacientes que no habían recibido ningún tipo de terapia anti- TNF y para pacientes que habiendo recibido terapia anti-TNF no la toleraron o no tuvieron una adecuada respuesta terapéutica.

En el MEASURE-2 (7, 11) se condujo un análisis de subgrupos que incluyó 219 pacientes de los cuales 85 pacientes (38.8%) habían recibido tratamiento anti-TNF sin respuesta o intolerancia. Estos 85 pacientes con un puntaje basal de BASDAI de 6.5 (DE 1.7), fueron asignados aleatoriamente a tres brazos de intervención; 28 recibieron 150mg de secukinumab s.c, 28 recibieron 75 mg de secukinumab s.c y 29 recibieron placebo. La respuesta terapéutica fue evaluada por los criterios ASAS20 que incluyen cuatro dominios (paciente global, dolor, función, inflamación), la respuesta fue definida como mejoría de al menos 20% en tres de los cuatro dominios o mejoría de al menos una unidad en una escala de 0 a 10 (11).

El estudio MEASURE 3 (8), fue diseñado con el objetivo de evaluar la eficacia y seguridad del secukinumab a diferentes regímenes; dosis de carga endovenosa de 10mg/kg (basal, a la semana 2 y 4 de tratamiento), seguimiento con dosis subcutáneas de 300mg o 150mg como dosis de mantenimiento cada cuatro semanas después de la cuarta semana y otra dosis de carga de 10mg/kg a las semanas 16 y 52 semanas de tratamiento (8). Se incluyeron 226 pacientes de los cuales, 53 sujetos habían presentado falla terapéutica o intolerancia farmacológica al manejo con un anti -TNF. Estos pacientes fueron aleatorizados a secukinumab 300mg (n=19), secukinumab 150mg (n=17) y placebo (n=17). La respuesta fue evaluada al igual que el estudio MEASURE 2.

#### Control enfermedad por remisión/baja actividad de síntomas

A la semana 16 una mayor proporción de sujetos tratados con secukinumab, habían alcanzado respuesta terapéutica según criterios de ASAS20 establecidos; de los 28 pacientes del brazo de secukinumab 150mg, 50% alcanzaron respuesta terapéutica ASAS20 ( $p < 0.05$  vs placebo) y 25% de 28 sujetos asignados al grupo de secukinumab 75mg ( $p > 0.05$  vs placebo) en comparación con 24.1% de los sujetos tratados con placebo (7,11). Las tasas de mejoría observadas a la semana 16 con secukinumab se mantuvieron o siguieron mejorando a la semana 52, para un estimado de respuesta terapéutica de 46.4% para la dosis de 150mg y de 32.1% en la dosis de 75mg.

Este análisis de subgrupos mostró que las tasas de respuesta a secukinumab fueron mayores en el grupo de pacientes que no había recibido previamente terapia anti TNF comparado con aquellos que

habían fallado a esta terapia, sin embargo, para este último grupo igualmente representan una alternativa de manejo al observarse tasas de respuesta cercanas a 50% (11).

En el estudio MEASURE 3 (8), la tasa de respuesta evaluada (ASAS 20) en pacientes con falla a anti TNF a la semana 16 medida fue igualmente mayor para los grupos de secukinumab en comparación con placebo, siendo mejor en el grupo que recibió la dosis de 300mg (47.4% vs 41.2% en el grupo de 150mg y 29.54% para el grupo que recibió placebo).

El metaanálisis de los resultados de respuesta terapéutica por los criterios ASAS 20 reportados por los estudios MEASURE 1 a 3, realizado como parte de esta guía, se presenta en el [apéndice 1](#). Los resultados muestran una tendencia hacia el aumento en la mejoría asociada con el uso de secukinumab (RR 1.79 IC95% [1.00, 3.19]), sin embargo, esta estimación aún no alcanza la precisión deseada para generar una conclusión sobre el verdadero efecto del secukinumab en la mejoría de los pacientes con EA. Se requieren más estudios que evalúen el efecto de este tratamiento en pacientes con AE para obtener mayor precisión en la estimación del efecto de este tratamiento. Certeza en la evidencia fue calificada como moderada según la aproximación GRADE ([apéndice 2](#)-tabla GRADE).

#### Calidad de vida relacionada con salud

En el estudio MEASURE 1 se observaron mejoras clínicamente significativas en el SF-36 MCS, BASFI, EQ-5D y BASDAI 50 con ambos grupos de secukinumab versus placebo en la semana 16 (14). En el estudio MEASURE 3 (11), se evaluó el impacto de los tratamientos en la calidad de vida a través del instrumento SF-36. Se observó una mejoría en la percepción de calidad de vida asociada al tratamiento con secukinumab en comparación con placebo. El promedio de cambio en el SF-36 para el grupo de secukinumab 150mg fue de 4.5 (DE 1.2), de 3.6 (DE 1.3) en el grupo que recibió dosis de 75mg y de 1.3 (DE 1.6) con placebo. Certeza en la evidencia fue calificada como alta según la aproximación GRADE. ([apéndice 2](#)-tabla GRADE).

#### Eventos adversos serios y no serios

En los experimentos MEASURE 1 a 4 (6-13) no se identificaron diferencias en la tasa de eventos adversos reportados durante el periodo de seguimiento de 16 semanas; los eventos adversos serios se reportaron entre 0 a 6% de los sujetos en el grupo con secukinumab y en 1% en el grupo placebo; la tasa general de eventos adversos fue de 46% a 70% en el grupo de sujetos que recibieron secukinumab y de 44% a 64% en los que recibieron placebo; el evento mas frecuentemente reportado fue nasofaringitis en 10 a 12% de los pacientes.

Un análisis conjunto de la incidencia de eventos adversos serios (EAS) y no serios (EA) en todos los pacientes que recibieron secukinumab en los estudios MEASURE 1 a 3 (n=794), mostró una densidad de incidencia de eventos adversos serios de 6.2 por 100 pacientes-año. Los eventos más frecuentes fueron: diarrea que se reportó en 5.7 por 100 pacientes-año, la nasofaringitis se reportó en un 12.3 por 100 pacientes-año, cefalea en un 6 por 100 pacientes-año e infecciones del tracto respiratorio alto 5.1 por 100 pacientes-año. La incidencia de infecciones serias, infección por candida, uveítis y enfermedad inflamatoria intestinal fue baja (0.7 por 100 pacientes-año). (15)

El metaanálisis de los resultados de eventos adversos reportados en el total de pacientes expuestos a secukinumab en los estudios MEASURE 1 a 3, realizado como parte de ésta guía, se presenta en el



**apéndice 1.** Los resultados no permiten generar una conclusión por su gran imprecisión (OR 1.18 IC95% [0.81 a 1,74]).

#### Valores y preferencia de pacientes

Se identificó un estudio realizado por Magrey en 2019 (16), en 200 pacientes con espondilitis anquilosante (EA) de Estados Unidos, con un promedio de edad de 34.4 años (DE 10.6). El 86.5% de los pacientes habían recibido previamente tratamiento con biológicos, solo 27 pacientes (13.5%) eran naive para terapia biológica. El estudio buscó evaluar la experiencia de los pacientes que recibían secukinumab a través de encuesta on-line en la que recopilaban datos demográficos e historial de tratamiento. Los pacientes informaron sobre los síntomas de EA experimentados antes y después del inicio del secukinumab, el tiempo hasta la mejoría de los síntomas y la satisfacción con tratamiento con secukinumab.

En total 148 pacientes (74%) reportaron mejoría general de los síntomas posterior al inicio de secukinumab (“poca mejoría” 34.5%, moderada 21% y “mucho mejor” 18.5%). La mayoría de los pacientes expresaron satisfacción con el tratamiento, 99% respecto a la mejoría de síntomas, 97% respecto a velocidad en la mejoría de los síntomas, 96% en la frecuencia de administración el secukinumab, 91.5% respecto al método de administración y 93,5% acerca de la facilidad de uso (93.5%).

#### Costos

Se identificó una evaluación económica de costo- efectividad realizada por el National Institute for Clinical Excellence (NICE) del Reino Unido en 2016 (17) con el fin de determinar la costo-efectividad del secukinumab para espondilitis anquilosante posterior al tratamiento con AINES o inhibidores TNF-alfa. Este análisis económico fue calificado como de buena calidad según criterios de evaluación de Drummond (anexo Excel).

Esta evaluación mostró que el secukinumab era costo-efectivo a un umbral de disposición a pagar de establecido para UK en 20.000 libras esterlinas (£) por QALY (de sus siglas en inglés años de vida ajustados por calidad) ya que era menos costoso y resultaba en un número similar de QALYs que los inhibidores TNF-alfa en los pacientes con espondilitis anquilosante que no habían sido tratados con agentes biológicos previamente.

Para la población de interés de la pregunta actual (población que ha sido tratada con terapia biológica previamente), el ICER para secukinumab comparado con la terapia convencional fue de £2,245 por QALY, por lo que se concluyó que el secukinumab podría considerarse rentable para las personas con EA han sido tratadas previamente con inhibidores de TNF-alfa (17).

## Marco de la evidencia a las decisiones

|                        |                                                                              |
|------------------------|------------------------------------------------------------------------------|
| PREGUNTA               |                                                                              |
| POBLACION              | Población de espondilitis Anquilosante                                       |
| INTERVENCIÓN           | Anti IL-17. Secukinumab                                                      |
| COMPARACIÓN            | Cuidado estándar                                                             |
| DESENLACES PRINCIPALES | Efectividad- Respuesta terapéutica<br>Perfil de seguridad – EVENTOS ADVERSOS |
| ÁMBITO                 | Ambulatorio                                                                  |
| PERSPECTIVA            | Del grupo desarrollador de la Guía                                           |
| CONFLICTO DE INTERÉS:  | No se declara ningún conflicto de interés                                    |

## Evaluación

| Problema                                                                                                                                                                    |                                                                                                                                                                                                                                                                                                                                                                                                                                                                                                                                                                                                                                       |                             |
|-----------------------------------------------------------------------------------------------------------------------------------------------------------------------------|---------------------------------------------------------------------------------------------------------------------------------------------------------------------------------------------------------------------------------------------------------------------------------------------------------------------------------------------------------------------------------------------------------------------------------------------------------------------------------------------------------------------------------------------------------------------------------------------------------------------------------------|-----------------------------|
| Es el problema una prioridad?                                                                                                                                               |                                                                                                                                                                                                                                                                                                                                                                                                                                                                                                                                                                                                                                       |                             |
| JUICIO                                                                                                                                                                      | EVIDENCIA DE LA INVESTIGACION                                                                                                                                                                                                                                                                                                                                                                                                                                                                                                                                                                                                         | CONSIDERACIONES ADICIONALES |
| <ul style="list-style-type: none"> <li>○ No</li> <li>○ Probablemente No</li> <li>○ Probablemente Si</li> <li>○ Si</li> <li>○ Es variable</li> <li>○ No se conoce</li> </ul> | La espondiloartritis axial es una enfermedad inflamatoria autoinmune de carácter crónico, que se caracteriza por dolor lumbar crónico, rigidez y pérdida progresiva de la movilidad. Si no se trata de forma adecuada la EspAax puede producir importante discapacidad, incluida la fusión del esqueleto axial y alteración en la calidad de vida. (12) Los AINES representan la primera línea de manejo, pero en aquellos pacientes que la enfermedad continua activa a pesar de este manejo convencional los inhibidores de TNF han revolucionado el panorama del tratamiento, sin embargo algunos pacientes fallan en responder al |                             |

|  |                                                                                                                                                       |  |
|--|-------------------------------------------------------------------------------------------------------------------------------------------------------|--|
|  | manejo con anti TNF o presentan intolerancia que obliga a suspender dichas terapias, por lo que nuevas opciones de tratamiento están disponibles (13) |  |
|--|-------------------------------------------------------------------------------------------------------------------------------------------------------|--|

## Efectos deseables (beneficios de la opción a recomendar)

¿Qué tan sustanciales son los efectos deseables de la opción?

| JUICIO                                                                                                                                                     | EVIDENCIA DE LA INVESTIGACION                                                                                                                                                                                                                                                                                                                                                                                                                                                                       | CONSIDERACIONES ADICIONALES     |                                             |                                 |                          |                              |             |          |                                |                 |       |      |                         |  |
|------------------------------------------------------------------------------------------------------------------------------------------------------------|-----------------------------------------------------------------------------------------------------------------------------------------------------------------------------------------------------------------------------------------------------------------------------------------------------------------------------------------------------------------------------------------------------------------------------------------------------------------------------------------------------|---------------------------------|---------------------------------------------|---------------------------------|--------------------------|------------------------------|-------------|----------|--------------------------------|-----------------|-------|------|-------------------------|--|
| <ul style="list-style-type: none"><li>○ Triviales</li><li>○ Pequeños</li><li>○ Moderados</li><li>○ Grandes</li><li>○ Varían</li><li>○ No se sabe</li></ul> | <p>Inhibidor de IL-17A Secukinumab en pacientes que han fallado al tratamiento con un anti TNF.</p> <table><tr><th>Desenlaces</th><th>Nº de participantes (estudios) seguimientos</th><th>Certeza de la evidencia (GRADE)</th><th>Efecto Relativo (95% CI)</th></tr><tr><td>Respuesta terapuetica-ASAS20</td><td>3 ECAs (91)</td><td>Moderada</td><td>Risk ratio 1.79 (1.00 to 3,19)</td></tr><tr><td>Calidad de vida</td><td>1 ECA</td><td>Alta</td><td>MD<br/>3.20 [2.83, 3.57]</td></tr></table> | Desenlaces                      | Nº de participantes (estudios) seguimientos | Certeza de la evidencia (GRADE) | Efecto Relativo (95% CI) | Respuesta terapuetica-ASAS20 | 3 ECAs (91) | Moderada | Risk ratio 1.79 (1.00 to 3,19) | Calidad de vida | 1 ECA | Alta | MD<br>3.20 [2.83, 3.57] |  |
| Desenlaces                                                                                                                                                 | Nº de participantes (estudios) seguimientos                                                                                                                                                                                                                                                                                                                                                                                                                                                         | Certeza de la evidencia (GRADE) | Efecto Relativo (95% CI)                    |                                 |                          |                              |             |          |                                |                 |       |      |                         |  |
| Respuesta terapuetica-ASAS20                                                                                                                               | 3 ECAs (91)                                                                                                                                                                                                                                                                                                                                                                                                                                                                                         | Moderada                        | Risk ratio 1.79 (1.00 to 3,19)              |                                 |                          |                              |             |          |                                |                 |       |      |                         |  |
| Calidad de vida                                                                                                                                            | 1 ECA                                                                                                                                                                                                                                                                                                                                                                                                                                                                                               | Alta                            | MD<br>3.20 [2.83, 3.57]                     |                                 |                          |                              |             |          |                                |                 |       |      |                         |  |

## Efectos Indeseables

¿Qué tan sustanciales son los efectos indeseables que se pueden anticipar?

| JUICIO                                                                                                                                                     | EVIDENCIA DE LA INVESTIGACION                                                                                                                                                                                                                                                                                                                                                                                                                                                                                                                                                                                                                                                                             | CONSIDERACIONES ADICIONALES     |                                             |                                 |                          |                  |              |          |                                |  |
|------------------------------------------------------------------------------------------------------------------------------------------------------------|-----------------------------------------------------------------------------------------------------------------------------------------------------------------------------------------------------------------------------------------------------------------------------------------------------------------------------------------------------------------------------------------------------------------------------------------------------------------------------------------------------------------------------------------------------------------------------------------------------------------------------------------------------------------------------------------------------------|---------------------------------|---------------------------------------------|---------------------------------|--------------------------|------------------|--------------|----------|--------------------------------|--|
| <ul style="list-style-type: none"><li>○ Triviales</li><li>○ Pequeños</li><li>○ Moderados</li><li>○ Grandes</li><li>○ Varían</li><li>○ No se sabe</li></ul> | <p>La frecuencia de los efectos adversos en los pacientes expuestos a secukinumab fue alta (70%) pero no superior al placebo (64%). Los eventos adversos no fueron serios y el evento adverso más reportado fue nasofaringitis con una frecuencia de 10-12%.</p> <p>Si bien se describen eventos adversos serios entre un 0-6% no se estima una medida de efecto ya que con placebo la tasa de EAS fue &lt;1%</p> <table><tr><th>Desenlaces</th><th>Nº de participantes (estudios) seguimientos</th><th>Certeza de la evidencia (GRADE)</th><th>Efecto Relativo (95% CI)</th></tr><tr><td>Eventos adversos</td><td>3 ECAs (444)</td><td>Moderada</td><td>Risk ratio 1.79 (1.00 to 3.19)</td></tr></table> | Desenlaces                      | Nº de participantes (estudios) seguimientos | Certeza de la evidencia (GRADE) | Efecto Relativo (95% CI) | Eventos adversos | 3 ECAs (444) | Moderada | Risk ratio 1.79 (1.00 to 3.19) |  |
| Desenlaces                                                                                                                                                 | Nº de participantes (estudios) seguimientos                                                                                                                                                                                                                                                                                                                                                                                                                                                                                                                                                                                                                                                               | Certeza de la evidencia (GRADE) | Efecto Relativo (95% CI)                    |                                 |                          |                  |              |          |                                |  |
| Eventos adversos                                                                                                                                           | 3 ECAs (444)                                                                                                                                                                                                                                                                                                                                                                                                                                                                                                                                                                                                                                                                                              | Moderada                        | Risk ratio 1.79 (1.00 to 3.19)              |                                 |                          |                  |              |          |                                |  |

## Certeza en la Evidencia

¿Cuál es la certeza en la evidencia global sobre los efectos de la opción a recomendar?

| JUICIO                                                                                                                                                   | EVIDENCIA DE LA INVESTIGACION                                                                                                                                                                                                                                                                                                                                               | CONSIDERACIONES ADICIONALES     |                      |                                 |                                                                    |          |                  |                  |          |              |  |
|----------------------------------------------------------------------------------------------------------------------------------------------------------|-----------------------------------------------------------------------------------------------------------------------------------------------------------------------------------------------------------------------------------------------------------------------------------------------------------------------------------------------------------------------------|---------------------------------|----------------------|---------------------------------|--------------------------------------------------------------------|----------|------------------|------------------|----------|--------------|--|
| <ul style="list-style-type: none"> <li>○ Muy baja</li> <li>○ Baja</li> <li>○ Moderada</li> <li>○ Alta</li> <li>○ No se identificaron estudios</li> </ul> | <table border="1"> <thead> <tr> <th>Desenlace</th><th>Importancia Relativa</th><th>Certeza de la evidencia (GRADE)</th></tr> </thead> <tbody> <tr> <td>Control enfermedad por remisión/baja actividad de síntomas ASAS 20</td><td>CRITICAL</td><td>⊕⊕⊕○<br/>Moderada</td></tr> <tr> <td>Eventos adversos</td><td>CRITICAL</td><td>⊕⊕○○<br/>Baja</td></tr> </tbody> </table> | Desenlace                       | Importancia Relativa | Certeza de la evidencia (GRADE) | Control enfermedad por remisión/baja actividad de síntomas ASAS 20 | CRITICAL | ⊕⊕⊕○<br>Moderada | Eventos adversos | CRITICAL | ⊕⊕○○<br>Baja |  |
| Desenlace                                                                                                                                                | Importancia Relativa                                                                                                                                                                                                                                                                                                                                                        | Certeza de la evidencia (GRADE) |                      |                                 |                                                                    |          |                  |                  |          |              |  |
| Control enfermedad por remisión/baja actividad de síntomas ASAS 20                                                                                       | CRITICAL                                                                                                                                                                                                                                                                                                                                                                    | ⊕⊕⊕○<br>Moderada                |                      |                                 |                                                                    |          |                  |                  |          |              |  |
| Eventos adversos                                                                                                                                         | CRITICAL                                                                                                                                                                                                                                                                                                                                                                    | ⊕⊕○○<br>Baja                    |                      |                                 |                                                                    |          |                  |                  |          |              |  |

## Valores de los pacientes

¿Hay variación o poca certeza sobre cómo valoran las personas/los pacientes los desenlaces principales?

| JUICIO                                                                                                                                                                                                                                 | EVIDENCIA DE LA INVESTIGACION                                                                                                                                                                                                                                                                                                                                                                         | CONSIDERACIONES ADICIONALES |
|----------------------------------------------------------------------------------------------------------------------------------------------------------------------------------------------------------------------------------------|-------------------------------------------------------------------------------------------------------------------------------------------------------------------------------------------------------------------------------------------------------------------------------------------------------------------------------------------------------------------------------------------------------|-----------------------------|
| <ul style="list-style-type: none"> <li>○ Variabilidad o incertidumbre importante</li> <li>○ Posiblemente hay variabilidad o incertidumbre importante</li> <li>○ Posiblemente No hay variabilidad o incertidumbre importante</li> </ul> | <p>Un estudio (Magrey M, 2019) identifico que la mayoría de los pacientes estaban satisfechos con el tratamiento con secukinumab. 99% de satisfacción respecto a la mejoría de síntomas, 97% respecto a velocidad en la mejoría de los síntomas, 96% en la frecuencia de administración el secukinumab, 91.5% respecto al método de administración y 93,5% acerca de la facilidad de uso (93.5%).</p> |                             |

|                                                                                                                                                                                                                                                                                                                                                                                         |                                                                                                           |                                    |
|-----------------------------------------------------------------------------------------------------------------------------------------------------------------------------------------------------------------------------------------------------------------------------------------------------------------------------------------------------------------------------------------|-----------------------------------------------------------------------------------------------------------|------------------------------------|
| <input type="radio"/> No hay variabilidad o incertidumbre importante                                                                                                                                                                                                                                                                                                                    |                                                                                                           |                                    |
| <div style="background-color: #2e75b6; color: white; padding: 5px;"> <b>Balance de los efectos</b><br/>         ¿El balance entre los efectos deseables e indeseables favorece la opción o el comparador?       </div>                                                                                                                                                                  |                                                                                                           |                                    |
| <b>JUICIO</b>                                                                                                                                                                                                                                                                                                                                                                           | <b>EVIDENCIA DE LA INVESTIGACION</b>                                                                      | <b>CONSIDERACIONES ADICIONALES</b> |
| <input type="radio"/> Favorece al comparador<br><input type="radio"/> Probablemente favorece al comparador<br><input type="radio"/> No favorece al comparador ni a la opción en evaluación<br><input type="radio"/> Probablemente favorece a la opción<br><input checked="" type="radio"/> Favorece la intervención<br><input type="radio"/> Varían<br><input type="radio"/> No se sabe | Se considera que el balance entre los efectos deseables e indeseables favorece el uso de la intervención. |                                    |
| <div style="background-color: #2e75b6; color: white; padding: 5px;"> <b>Recursos Requeridos</b> </div>                                                                                                                                                                                                                                                                                  |                                                                                                           |                                    |

| Que tan grande es el requerimiento de recursos (costos)?                                                                                                                                                                                                                                                                   |                                                                                                                                                                                                   |                             |
|----------------------------------------------------------------------------------------------------------------------------------------------------------------------------------------------------------------------------------------------------------------------------------------------------------------------------|---------------------------------------------------------------------------------------------------------------------------------------------------------------------------------------------------|-----------------------------|
| JUICIO                                                                                                                                                                                                                                                                                                                     | EVIDENCIA DE LA INVESTIGACION                                                                                                                                                                     | CONSIDERACIONES ADICIONALES |
| <input type="radio"/> Grandes costos<br><input type="radio"/> Costos moderados<br><input checked="" type="radio"/> no significantes costos ni ahorros<br><input type="radio"/> Moderados ahorros<br><input type="radio"/> Grandes ahorros<br><input type="radio"/> Varían<br><input type="radio"/> No se sabe              | Se considera que el secukinumab podría ser rentable para las personas con EA han sido tratadas previamente con inhibidores de TNF-alfa al encontrar un costo de £2,245 por QALY (costos año 2016) |                             |
| <b>Equidad</b><br>¿La implementación de la opción, tendrá impacto en la equidad?                                                                                                                                                                                                                                           |                                                                                                                                                                                                   |                             |
| JUICIO                                                                                                                                                                                                                                                                                                                     | EVIDENCIA DE LA INVESTIGACION                                                                                                                                                                     | CONSIDERACIONES ADICIONALES |
| <input type="radio"/> Reduce<br><input type="radio"/> Probablemente se reduce la equidad<br><input type="radio"/> Probablemente no impacta la equidad<br><input type="radio"/> Probablemente incrementa<br><input type="radio"/> Incrementa<br><input type="radio"/> Varían<br><input checked="" type="radio"/> No se sabe |                                                                                                                                                                                                   |                             |
| <b>Aceptabilidad</b><br>¿Es la opción aceptada por los diferentes actores involucrados en su implementación?                                                                                                                                                                                                               |                                                                                                                                                                                                   |                             |

| JUICIO                                                                                                                                                              | EVIDENCIA DE LA INVESTIGACION                                                                                                                                                                                                                                                                                                      | CONSIDERACIONES ADICIONALES |
|---------------------------------------------------------------------------------------------------------------------------------------------------------------------|------------------------------------------------------------------------------------------------------------------------------------------------------------------------------------------------------------------------------------------------------------------------------------------------------------------------------------|-----------------------------|
| <ul style="list-style-type: none"> <li>○ No</li> <li>○ Probablemente no</li> <li>○ Probablemente si</li> <li>○ Si</li> <li>○ Varia</li> <li>○ No se sabe</li> </ul> | <p>La guía EULAR recomienda en caso de que una terapia con anti TNF falle cambiar a otro anti TNF o a una terapia anti IL17.</p> <p>Así mismo la EspoGuía en su actualización de 2018 recomienda en pacientes con espondiloartritis axial que no han respondido a anti-TNF, manejo con otro anti-TNF u otra terapia biológica.</p> |                             |
| <b>Factibilidad</b><br>¿Es la opción factible de IMPLEMENTAR?                                                                                                       |                                                                                                                                                                                                                                                                                                                                    |                             |
| JUICIO                                                                                                                                                              | EVIDENCIA DE LA INVESTIGACION                                                                                                                                                                                                                                                                                                      | CONSIDERACIONES ADICIONALES |
| <p>No</p> <ul style="list-style-type: none"> <li>○ Probablemente no</li> <li>○ Probablemente si</li> <li>○ Si</li> <li>○ Varia</li> <li>○ No se sabe</li> </ul>     | <p>No se encontraron estudios de factibilidad de pacientes en espondiloartritis con relación a los procesos diagnósticos</p>                                                                                                                                                                                                       |                             |

## Resumen de Juicios



## GPC para pacientes con Espondiloartritis Axial ASOREUMA

|                         | JUICIOS                                 |                                                      |                                                              |                                            |                            |       |                     |
|-------------------------|-----------------------------------------|------------------------------------------------------|--------------------------------------------------------------|--------------------------------------------|----------------------------|-------|---------------------|
| PROBLEMA                | No                                      | Probablemente no                                     | Probablemente si                                             | Si                                         |                            | Varia | No se sabe          |
| EFFECTOS DESEABLES      | Trivial                                 | Pequeño                                              | Moderado                                                     | Grande                                     |                            | Varia | No se sabe          |
| EFFECTOS INDESEABLES    | Grande                                  | Moderado                                             | Pequeño                                                      | Trivial                                    |                            | Varia | No se sabe          |
| CERTEZA EN LA EVIDENCIA | Muy Bajo                                | Bajo                                                 | Moderado                                                     | Alto                                       |                            |       | No incluyó estudios |
| VALORES DE PACIENTES    | Importante incertidumbre o variabilidad | Posiblemente importante incertidumbre o variabilidad | Probablemente no hay importante incertidumbre o variabilidad | No importante incertidumbre o variabilidad |                            |       |                     |
| BALANCE DE LOS EFECTOS  | Favorece al comparador                  | Probablemente Favorece al comparador                 | No favorece ni a la intervención ni al comparador            | Probablemente favorece a la intervención   | Favorece a la intervención | Varia | No se sabe          |
| RECURSOS REQUERIDOS     | Grandes costos                          | Moderados costos                                     | Costos y ahorros insignificantes                             | Moderados ahorros                          | Grandes ahorros            | Varia | No se sabe          |
| EQUIDAD                 | Reducida                                | Probablemente reducida                               | Probablemente no impactada                                   | Probablemente incrementada                 | Incrementada               | Varia | No se sabe          |
| ACEPTABILIDAD           | No                                      | Probablemente no                                     | Probablemente si                                             | Si                                         |                            | Varia | No se sabe          |
| FACTIBILIDAD            | No                                      | Probablemente no                                     | Probablemente si                                             | Si                                         |                            | Varia | No se sabe          |

## Tipo de Recomendación

|                                             |                                                  |                                                                           |                                                |                                           |
|---------------------------------------------|--------------------------------------------------|---------------------------------------------------------------------------|------------------------------------------------|-------------------------------------------|
| Recomendación fuerte en contra de la opción | Recomendación condicional en contra de la opción | Recomendación condicional a favor de cualquiera la opción o su comparador | Recomendación condicional a favor de la opción | Recomendación fuerte a favor de la opción |
| ○                                           | ○                                                | ○                                                                         | ○                                              | ○                                         |

## Conclusiones

### Recomendación

En pacientes con espondiloartritis anquilosante, que presentan falla terapéutica o intolerancia farmacológica a los anti- TNF $\alpha$ , se sugiere el inicio de un anti IL17A. Recomendación condicional a favor de la intervención. Certeza de la evidencia baja

### Justificación

Se recomienda de forma condicional el uso de secukinumab como terapia de segunda línea dado que la evidencia encontrada es de baja calidad, proveniente de análisis de subgrupos con un número bajo de participantes, pero con análisis de seguridad de la terapia adecuados y evaluación de costo efectividad que muestra que secukinumab podría considerarse rentable para las personas con EA han sido tratadas previamente con inhibidores de TNF-alfa.

### Consideraciones por subgrupos

No se identifican como necesarias.

### Consideraciones de implementación

Socialización y difusión de la guía por los diferentes entes de salud y gubernamentales.

#### Monitoreo y evaluación de cumplimiento

Seguimiento ambulatorio de los pacientes mediante clinimetría

#### Prioridades de investigación futura

Diseñar e implementar ECAs de alta calidad que mejoren la certeza de la evidencia

## Apéndice 1. metaanálisis Secukinumab vs Placebo

### 1. Respuesta terapéutica (ASAS20) en pacientes que recibieron 150 mg de Secukinumab y habían sido expuestos a anti-TNF previamente.

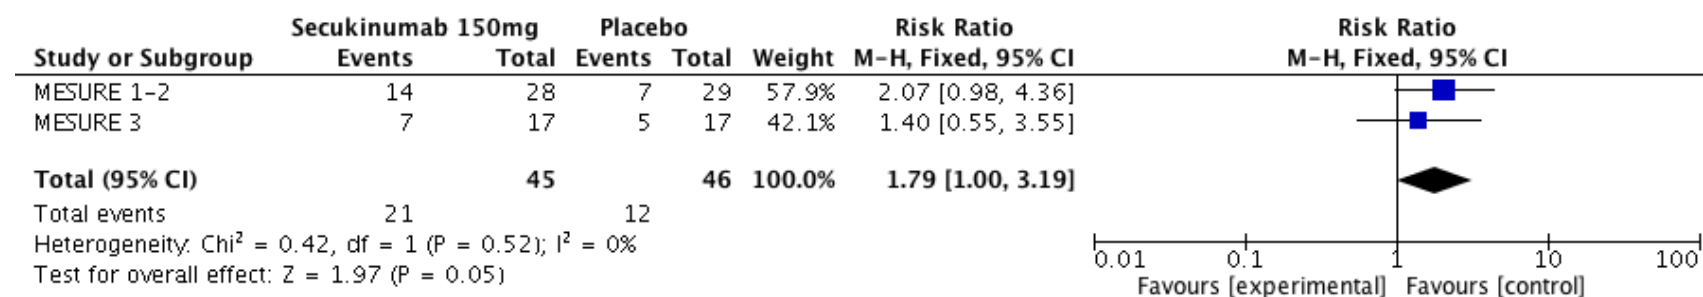

MESURE 1-2. Sieper J, Deodhar A, Marzo-Ortega H, Aelion JA, Blanco R, Jui-Cheng T, Andersson M, Porter B, Richards HB; MEASURE 2 Study Group. Secukinumab efficacy in anti-TNF-naïve and anti-TNF-experienced subjects with active ankylosing spondylitis: results from the MEASURE 2 Study. *Ann Rheum Dis*. 2017 Mar;76(3):571-592.

MEASURE 3. Pavelka K, Kivitz A, Dokoupilova E, Blanco R, Maradiaga M, Tahir H, Pricop L, Andersson M, Readie A, Porter B. Efficacy, safety, and tolerability of secukinumab in patients with active ankylosing spondylitis: a randomized, double-blind phase 3 study, MEASURE 3. *Arthritis Res Ther*. 2017 Dec 22;19(1):285.

### 2. Eventos adversos en el total de pacientes expuestos a Secukinumab vs Placebo

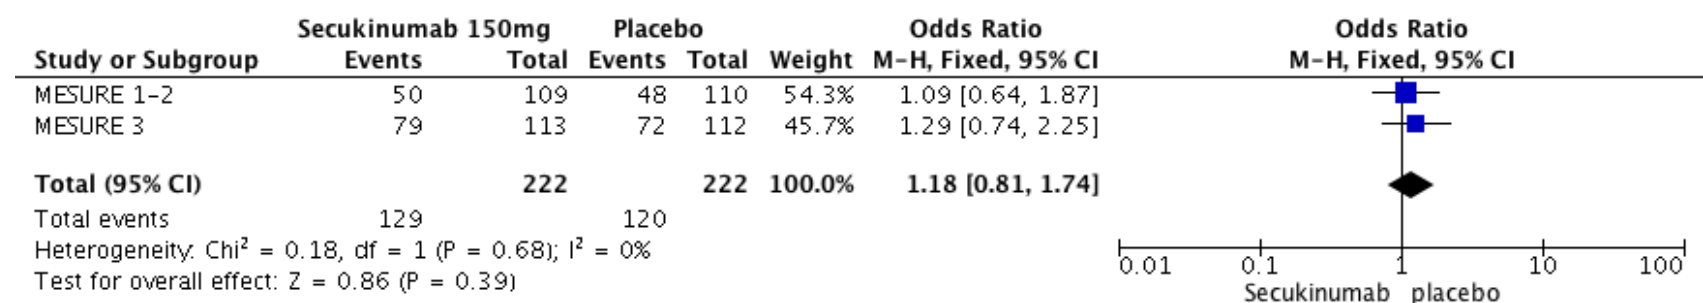

3. Calidad de vida relacionada con salud Secukinumab vs Placebo

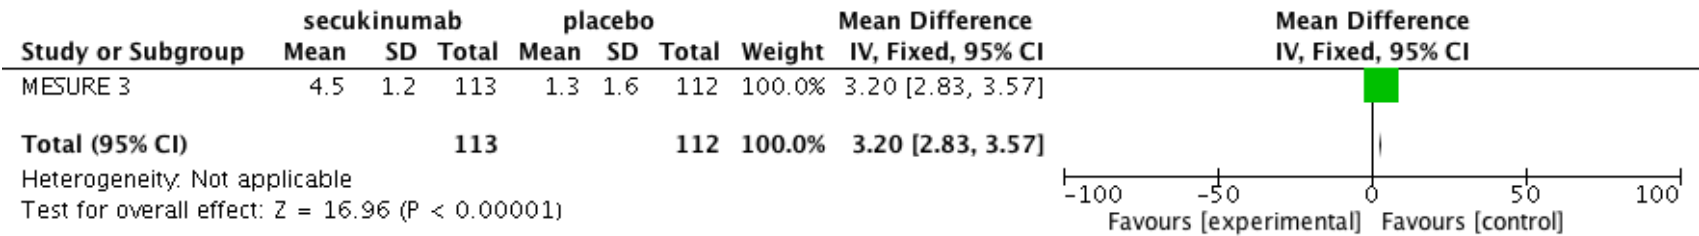

MEASURE 3. Pavelka K, Kivitz A, Dokoupilova E, Blanco R, Maradiaga M, Tahir H, Pricop L, Andersson M, Readie A, Porter B. Efficacy, safety, and tolerability of secukinumab in patients with active ankylosing spondylitis: a randomized, double-blind phase 3 study, MEASURE 3. Arthritis Res Ther. 2017 Dec 22;19(1):285.

## Apéndice 2. Tablas GRADE

## 1. Efectividad (Respuesta terapéutica fue evaluada por medio de los criterios ASAS20) (11) (8)

| Certeza     |        |                 |                |                     |                    |                       | Nº pacientes |                     | efecto                        |                   | Certeza          | Importancia |
|-------------|--------|-----------------|----------------|---------------------|--------------------|-----------------------|--------------|---------------------|-------------------------------|-------------------|------------------|-------------|
| Nº estudios | Diseño | riesgo de sesgo | inconsistencia | evidencia indirecta | Imprecisión        | Otras consideraciones | Secukinimab  | Estándar de cuidado | Relativo (95% CI)             | Absoluto (95% CI) |                  |             |
| 3           | ECAs   | no serio        | no serio       | no serio            | Serio <sup>a</sup> | no                    | 45           | 46                  | Risk ratio 1.79 (1.00 a 3,19) |                   | ⊕⊕⊕○<br>Moderada | Crítico     |

## 2. Efectividad (Calidad de vida relacionada con salud-cambio en la escala SF 36 semana 16 de tratamiento) (11) (8)

| Certeza     |        |                 |                |                     |             |                       | Nº pacientes |                     | efecto               |                   | Certeza      | Importancia |
|-------------|--------|-----------------|----------------|---------------------|-------------|-----------------------|--------------|---------------------|----------------------|-------------------|--------------|-------------|
| Nº estudios | Diseño | riesgo de sesgo | inconsistencia | evidencia indirecta | Imprecisión | Otras consideraciones | Secukinimab  | Estándar de cuidado | Relativo (95% CI)    | Absoluto (95% CI) |              |             |
| 1           | ECAs   | no serio        | no serio       | no serio            | no serio    | no                    | 113          | 112                 | MD 3.20 [2.83, 3.57] |                   | ⊕⊕⊕⊕<br>Alta | Crítico     |

El intervalo de confianza incluye el valor de 1 (no diferencia) es no conclusivo. No se cumple el principio de tamaño óptimo de información (OIS)

3. Perfil de seguridad Eventos adversos (11) (8)

| Certeza     |        |                 |                |                     |                        |                       | Nº pacientes |                     | efecto                         |                   | Certeza      | Importancia |
|-------------|--------|-----------------|----------------|---------------------|------------------------|-----------------------|--------------|---------------------|--------------------------------|-------------------|--------------|-------------|
| Nº estudios | Diseño | riesgo de sesgo | inconsistencia | evidencia indirecta | Imprecisión            | Otras consideraciones | Secukinimab  | Estándar de cuidado | Relativo (95% CI)              | Absoluto (95% CI) |              |             |
| 3           | ECAs   | no serio        | no serio       | no serio            | Muy serio <sup>b</sup> | no                    | 222          | 222                 | Odss ratio 1.18 (0.81 to 1,74) |                   | ⊕⊕○○<br>Baja | Crítica     |

b. La estimación es imprecisa por bajo número de eventos en la población estudiada. No se cumple el principio de tamaño óptimo de información (OIS)

## Referencias:

1. Rudwaleit M, van der Heijde D, Landewe R, Listing J, Akkoc N, Brandt J, et al. The development of assessment of SpondyloArthritis International Society classification criteria for axial spondyloarthritis (part II): validation and final selection. *Ann Rheum Dis*. 2009;68(6):777–83.
2. Ward MM, Deodhar A, Akl EA, Lui A, Ermann J, Gensler LS, et al. American College of Rheumatology/Spondylitis Association of America/Spondyloarthritis Research and Treatment Network 2015 Recommendations for the Treatment of Ankylosing Spondylitis and Nonradiographic Axial Spondyloarthritis. *Arthritis Rheumatol* Hoboken NJ [Internet]. febrero de 2016 [citado 28 de noviembre de 2019];68(2):282-98. Disponible en: <https://www.ncbi.nlm.nih.gov/pmc/articles/PMC5123840/>
3. Baeten D, Baraliakos X, Braun J, Sieper J, Emery P, van der Heijde D, McInnes I, van Laar JM, Landewé R, Wordsworth P, Wollenhaupt J, Kellner H, Paramarta J, Wei J, Brachet A, Bek S, Laurent D, Li Y, Wang YA, Bertolino AP, Gsteiger S, Wright AM, Hueber W. Anti-interleukin-17A monoclonal antibody secukinumab in treatment of ankylosing spondylitis: a randomised, double-blind, placebo-controlled trial. *Lancet*. 2013 Nov 23;382(9906):1705-13. doi: 10.1016/S0140-6736(13)61134-4. Epub 2013 Sep 13.
4. Sakkas LI, Zafiriou E, Bogdanos DP. Mini Review: New Treatments in Psoriatic Arthritis. Focus on the IL-23/17 Axis. *Front Pharmacol*. 2019;10:872. Published 2019 Aug 6. doi:10.3389/fphar.2019.00872
5. von Stebut E, Boehncke WH, Ghoreschi K, et al. IL-17A in Psoriasis and Beyond: Cardiovascular and Metabolic Implications. *Front Immunol*. 2020;10:3096. Published 2020 Jan 15. doi:10.3389/fimmu.2019.03096
6. Braun J, Baraliakos X, Deodhar A, Poddubnyy D, Emery P, Delicha EM, Tallozy Z, Porter B. Secukinumab shows sustained efficacy and low structural progression in ankylosing spondylitis: 4-year results from the MEASURE 1 study. *Rheumatology (Oxford)*. 2019 May 1;58(5):859-868. doi: 10.1093/rheumatology/key375. PubMed PMID: 30590813; PubMed Central PMCID: PMC6477523.
7. Marzo-Ortega H, Sieper J, Kivitz A, Blanco R, Cohen M, Delicha EM, Rohrer S, Richards H. Secukinumab provides sustained improvements in the signs and symptoms of active ankylosing spondylitis with high retention rate: 3-year results from the phase III trial, MEASURE 2. *RMD Open*. 2017 Dec 28;3(2):e000592. doi: 10.1136/rmdopen-2017-000592. eCollection 2017. PubMed PMID: 29435364; PubMed Central PMCID: PMC5761290.
8. Pavelka K, Kivitz A, Dokoupilova E, Blanco R, Maradiaga M, Tahir H, Pricop L, Andersson M, Readie A, Porter B. Efficacy, safety, and tolerability of secukinumab in patients with active ankylosing spondylitis: a randomized, double-blind phase 3 study, MEASURE 3. *Arthritis Res Ther*. 2017 Dec 22;19(1):285. doi: 10.1186/s13075-017-1490-y. PubMed PMID: 29273067; PubMed Central PMCID: PMC5741872.
9. Baraliakos X, Kivitz AJ, Deodhar AA, Braun J, Wei JC, Delicha EM, Tallozy Z, Porter B; MEASURE 1 Study Group. Long-term effects of interleukin-17A inhibition with secukinumab in active ankylosing spondylitis: 3-year efficacy and safety results from an extension of the Phase 3 MEASURE 1 trial. *Clin Exp Rheumatol*.



2018 Jan-Feb;36(1):50-55. Epub 2017 May 15. PubMed PMID: 28516874.

10. Braun J, Baraliakos X, Deodhar A, Baeten D, Sieper J, Emery P, Readie A, Martin R, Mpofu S, Richards HB; MEASURE 1 study group. Effect of secukinumab on clinical and radiographic outcomes in ankylosing spondylitis: 2-year results from the randomised phase III MEASURE 1 study. *Ann Rheum Dis*. 2017 Jun;76(6):1070-1077. doi: 10.1136/annrheumdis-2016-209730. Epub 2016 Dec 13. PubMed PMID: 27965257.

11. Sieper J, Deodhar A, Marzo-Ortega H, Aelion JA, Blanco R, Jui-Cheng T, Andersson M, Porter B, Richards HB; MEASURE 2 Study Group. Secukinumab efficacy in anti-TNF-naïve and anti-TNF-experienced subjects with active ankylosing spondylitis: results from the MEASURE 2 Study. *Ann Rheum Dis*. 2017 Mar;76(3):571-592. doi: 10.1136/annrheumdis-2016-210023. Epub 2016 Aug 31. PubMed PMID: 27582421.

12. Baeten D, Sieper J, Braun J, Baraliakos X, Dougados M, Emery P, Deodhar A, Porter B, Martin R, Andersson M, Mpofu S, Richards HB; MEASURE 1 Study Group; MEASURE 2 Study Group. Secukinumab, an Interleukin-17A Inhibitor, in Ankylosing Spondylitis. *N Engl J Med*. 2015 Dec 24;373(26):2534-48. doi: 10.1056/NEJMoa1505066. PubMed PMID: 26699169.

13. Kivitz AJ, Wagner U, Dokoupilova E, Supronik J, Martin R, Talloczy Z, et al. Efficacy and Safety of Secukinumab 150 mg with and Without Loading Regimen in Ankylosing Spondylitis: 104-week Results from MEASURE 4 Study. *Rheumatol Ther*. diciembre de 2018;5(2):447-62.

14. Deodhar AA, Dougados M, Baeten DL, Cheng-Chung Wei J, Geusens P, Readie A, Richards HB, Martin R, Porter B. Effect of Secukinumab on Patient-Reported Outcomes in Patients With Active Ankylosing Spondylitis: A Phase III Randomized Trial (MEASURE 1). *Arthritis Rheumatol*. 2016 Dec;68(12):2901-2910. doi: 10.1002/art.39805. PubMed PMID: 27390130

15. Secukinumab Demonstrates Consistent Safety over Long-Term Exposure (up to 3 years) in Patients with Active Ankylosing Spondylitis: Pooled Analysis of Three Phase 3 Trials [Internet]. ACR Meeting Abstracts. [citado 14 de enero de 2020]. Disponible en: <https://acrabstracts.org/abstract/secukinumab-demonstrates-consistent-safety-over-long-term-exposure-up-to-3-years-in-patients-with-active-ankylosing-spondylitis-pooled-analysis-of-three-phase-3-trials/>

16. Magrey M, Bozyczko M, Wolin D, Mordin M, McLeod L, Davenport E, et al. A Pilot Study to Assess the Feasibility of a Web-Based Survey to Examine Patient-Reported Symptoms and Satisfaction in Patients with Ankylosing Spondylitis Receiving Secukinumab. *Drugs - Real World Outcomes*. junio de 2019;6(2):83-91.

17. Overview | Secukinumab for active ankylosing spondylitis after treatment with non-steroidal anti-inflammatory drugs or TNF-alpha inhibitors | Guidance | NICE [Internet]. [citado 8 de febrero de 2020]. Disponible en: <https://www.nice.org.uk/guidance/TA407>

18. Ha B. Secukinumab: A Review in Ankylosing Spondylitis. *Drugs* [Internet]. 1 de marzo de 2019 [citado 27 de abril de 2020];79(4):433-43. Disponible en: <https://europepmc.org/article/pmc/pmc6422944>

19. Antonelli M, Khan MA, Magrey MN. Differential Adverse Events Between TNF- $\alpha$  Inhibitors and IL-17 Axis Inhibitors for the Treatment of Spondyloarthritis. *Curr Treat Options Rheumatol* [Internet]. 1 de junio de 2015 [citado 27 de abril de 2020];1(2):239-54. Disponible en: <https://doi.org/10.1007/s40674-015-0022-7>

## Pregunta 9:

¿En pacientes adultos con Espondiloartritis Axial qué tan eficaz y seguro es el uso de terapias no farmacológicas?

|                     |                                                                                                                                                                  |
|---------------------|------------------------------------------------------------------------------------------------------------------------------------------------------------------|
| <b>Población</b>    | Espondiloartritis axial                                                                                                                                          |
| <b>Intervención</b> | 1- Terapia física 2- terapia ocupacional 3- hidroterapia, 4- ejercicio                                                                                           |
| <b>Comparación</b>  | No manejo                                                                                                                                                        |
| <b>Desenlaces</b>   | Control enfermedad/remisión/baja actividad de síntomas,<br>Mejoría de escalas de funcionalidad<br>Calidad de vida<br>Progresión radiográfica<br>Eventos adversos |

## Antecedentes

La espondilitis anquilosante (EA) se caracteriza por dolor, alteraciones estructurales y funcionales, como la reducción en la movilidad y la deformidad axial, a pesar de su carácter crónico se dispone de diferentes alternativas de tratamiento tanto farmacológico como no farmacológico para aliviar los síntomas, disminuir la progresión de la enfermedad y tratar secuelas. En la actualidad no se recomienda el sedentarismo y los programas de ejercicio son una herramienta fundamental en el manejo de la EA. (1)

## Evidencia

No se identificaron estudios que evaluaran comparativamente todas las terapias físicas disponibles, sin embargo, si se identificaron estudios que evaluaran algunas de ellas en comparación con otras o con la opción de no hacer terapia física. Se presenta la evidencia identificada para cada desenlace de interés con el uso de cada una de ellas.

## Estado funcional

### Terapia física

La actualización de las recomendaciones para el tratamiento de pacientes con espondilitis anquilosante (AS) y espondiloartritis axial no radiográfica (EspAax-nr), de la American College of Rheumatology/ Spondylitis Association (2), incluye una recomendación sobre realizar terapia física sobre no realizarla (recomendación fuerte e favor calidad de la evidencia moderada.) Esta recomendación se construye a partir de la evidencia de dos ensayos clínicos controlados (3)(4) que soportan la efectividad de la terapia física en pacientes con EA activa. La calidad de la evidencia

calificada estuvo determinada por el riesgo de sesgo de los estudios y su tamaño de muestra pequeños. Así mismo, se generó una recomendación en la cual se prefieren las intervenciones de terapia física activa supervisadas sobre la terapia física pasiva que incluye masajes, ultrasonido y calor. Para esta recomendación no se contó con estudios comparativos, pero se consideró que uno de los objetivos de la terapia física era educar a los pacientes en estrategias de automanejo, lo cual requiere de un ambiente supervisado, por lo que se indicó que las intervenciones pasivas pueden ser complementarias, pero no substituir las estrategias de terapia física activa. La calidad de la evidencia para esta recomendación fue baja a favor de la intervención.

También se recomendó la terapia física en tierra sobre la terapia física que se realiza en agua; esta recomendación se construyó a partir de la evidencia de cuatro ensayos clínicos controlados que compararon estas dos estrategias, no se encontraron diferencias significativas a corto plazo en la actividad de la enfermedad, dolor o rigidez entre los grupos de tratamiento, dado lo anterior el panel considero que la terapia acuática no debe tener prioridad sobre la terapia terrestre, en ausencia de diferencias y teniendo en cuenta que se requiere acceso a una piscina o bañera de hidroterapia, la terapia en tierra fue condicionalmente preferida porque el acceso a la terapia en tierra es mayor. La evidencia que soporta esta recomendación es de moderada calidad (1).

La evidencia para este desenlace fue evaluada como de calidad moderada (apéndice 1-tablas GRADE)

## Terapia ocupacional

Se identificó un ensayo clínico controlado abierto (5), cuyo objetivo fue evaluar el efecto de la terapia ocupacional sobre el estado funcional de los pacientes con espondilitis anquilosante tratados con medicamentos anti-TNF. Se incluyeron 27 sujetos que fueron asignados aleatoriamente 14 al grupo de terapia ocupacional y 13 al grupo control, resultandos comparables en sus características clínicas y demográficas basales. El seguimiento se realizó por 16 semanas, entre las mediciones se incluyen reactantes de fase aguda (proteína C reactiva y VSG), el “*spondylitis disease activity index (BASDAI)*”, el “*disease functional index (BASFI)*”, el “*Bath AS Metrology Index (BASMI)*”, la calidad de vida con el SF-36 y el dolor evaluado con la escala visual análoga.

Entre sus resultados se destacan:

Para el BASFI la diferencia de mediana fue de 5.5 Percentil 25-75 (0-9) en el grupo de intervención y -4 Percentil 25-75(-8 a 1.5) en el grupo control, con diferencias estadísticamente significativas entre los grupos ( $p<0.05$ )

Para el BASDAI en el grupo de intervención la diferencia de mediana fue de 0.6 Percentil 25-75 (0.21 a 1.8) y en el grupo control fue de -0.77 Percentil 25-75 (-1.8 a 0.7) con diferencias estadísticamente significativas entre grupos ( $p<0.02$ )

Para el BASMI no se encontraron diferencias entre los grupos.

La calidad de vida evaluada SF 36 tuvo una diferencia estadísticamente significativa entre los grupos de intervención( $p<0.02$ ) con una diferencia de mediana en el grupo de intervención de -1.5 Percentil 25-75 (-2 a 5) y en el grupo control de 6 Percentil 25-75 (4 a 8).

Los autores concluyeron que esta estrategia podría ser benéfica en pacientes que estaban recibiendo tratamiento anti-TNF.

## Hidroterapia

Se identificó una revisión sistemática (Zão 2017) (6), realizada con el objetivo evaluar la evidencia actual y evaluar el papel del ejercicio en tierra o en el agua para el manejo de pacientes con EA en la era biológica. Esta revisión incluyó 35 estudios para un total de 2515 pacientes de los cuales, de los cuales 30 estudios hacían referencia a ejercicio en tierra y 5 al ejercicio en agua. La RS mostró heterogeneidad en los estudios incluidos e importante riesgo de sesgo entre los estudios no aleatorios, su calidad metodológica fue evaluada con la lista de chequeo de AMSTAR (7), y se consideró de calidad aceptable, siendo la evidencia más actualizada y de mejor calidad para responder la pregunta. Se evalúan aquí, los dos estudios experimentales que evaluaron el efecto aditivo del ejercicio en agua en paciente con manejo farmacológico estándar (8)(9) y dos estudios que compararon el ejercicio en agua vs tierra (10)(11).

### Efecto aditivo de la hidroterapia

El ECA realizado por Fernández & cols. (8) incluyó 30 pacientes, 15 fueron asignados al grupo experimental y 15 al control. En el grupo experimental realizaron un programa de entrenamiento acuático más estiramiento durante 8 semanas 3 sesiones/semana. Entre las mediciones se incluyó el BASFI, BASDAI, Spondylitis Metrology Index (BASMI) y calidad de vida con el SF-12. En comparación con los valores basales, el grupo que recibió un programa de ejercicio acuático supervisado mostró una mejoría clínica y estadísticamente significativa en la calidad de vida, BASFI y BASDAI.

El estudio de Ciprian (9), buscó evaluar el efecto y seguridad de la terapia de spa (lodo y baños termales) y ejercicios en piscina térmica (ejercicios de movilización de columna, fortalecimiento de músculos de columna) en un grupo de pacientes con EA tratado con anti-TNF. Las escalas de BASFI, BASDAI, escala visual análoga de dolor (VAS) y calidad de vida evaluada por HAQ, se evaluaron a los 2, 3 y 6 meses. Entre los resultados se destacan: a los 3 meses seguimiento en el grupo de intervención se encontró una mejoría estadísticamente significativa con respecto a la evaluación basal en el VAS, BASMI y HAQ a los 6 meses esta diferencia se mantuvo para VAS y HAQ.

### Ejercicio en agua vs en tierra

Dundar (10) condujo un ECA en el que comparó la efectividad de ejercicios acuáticos vs ejercicios realizados en casa. En el grupo de terapia acuática (n=35) los pacientes realizaron 20 sesiones en 4 semanas de sesiones de calentamiento, ejercicios acuáticos, ejercicios aeróbicos y estiramiento. El grupo de ejercicio en tierra (N=34), realizó sesiones por 4 semanas de estiramiento y relajación de grupos musculares, ejercicios de flexibilidad y fortalecimiento de músculos. Los pacientes recibieron instrucción por fisioterapeuta dado que el programa se realizó de forma no supervisada en casa, el seguimiento fue telefónico. Se encontró mejoría significativa en la calidad de vida, BASFI, BASMI y BASDAI para los dos grupos de intervención al comparar los valores del inicio y al término de la intervención, pero no se encontró diferencias estadísticamente significativas entre los dos tipos de ejercicio para estos desenlaces, el BASFI al final del seguimiento fue de -0.25 (DE 0.09) vs -0.27 (DE 0.13), el BASMI fue de -0.22 (DE 0.07) vs -0.23 (DE 0.09) y el BASDAI fue de -0.3 (DE 0.1) vs -0.3 (DE 0.12). La evaluación de sesgo mostró un bajo riesgo, el único aspecto en el que el riesgo fue alto fue en el cegamiento dado que solo un brazo estuvo cegado.

Karapolar (11) estudio el efecto nadar vs caminar vs ejercicio convencional, sobre la capacidad de ejercicio, la función pulmonar y la calidad de vida. Se incluyeron 45 pacientes los cuales fueron aleatorizados 15 a cada brazo y evaluados antes y después del programa de rehabilitación. Al final un total de 37 pacientes completó el estudio.

Al término del estudio se evaluaron los desenlaces comparando las tres intervenciones: nadar vs caminar vs ejercicio convencional. Con respecto a la caminata de 6 minutos el grupo de nadar mostro una diferencia estadísticamente significativa al comparar los valores basales con respecto al término de la intervención Pre MD 353.062±82.31 vs Pos MD 496.25(SD±53.30), dicho beneficio también se encontró en el grupo de caminar Pre MD 400.10±95.62 vs pos MD 441.80(±110.32), esta mejoría no se documentó en el grupo de ejercicio convencional y al comparar los grupos de nadar y caminar se encontró una diferencia estadísticamente significativa a favor del grupo de nadar ( $p<0.05$ ).

La comparación de los tres grupos de ejercicio mostró que el puntaje del BASDAI incremento significativamente en el grupo de ejercicio en agua comparado con el grupo de ejercicio convencional ( $1.90\pm1.61$  vs  $2.03\pm1.86$   $p<0.05$ ), pero con respecto a función pulmonar, BASMI y BASFI no se encontraron diferencias estadísticamente significativas entre los tres grupos de ejercicio. La evaluación de sesgo mostró un bajo riesgo, el único aspecto en el que el riesgo fue alto dado que no hubo cegamiento por la naturaleza de las intervenciones (nadar, caminar).

## Ejercicio

Se identificó la revisión sistemática de Pécourneau 2018(12). La calidad metodológica de esta revisión fue evaluada como “aceptable” según la lista de chequeo de AMSTAR, el resultado de esta evaluación se debe a la inclusión de esquemas de ejercicio heterogéneos entre los estudios. Esta revisión incluyo 8 estudios con un total de 331 pacientes. El ejercicio se categorizo como: 1) realizado en casa en 3, en el que los pacientes recibían instrucción por escrito con ilustraciones y debían realizar el programa por 12 semanas; 2) pilates en sesiones de 1 hora, 3 veces por semana por 12 semanas y 3) programas de fuerza y resistencia.

Sin importar el tipo de ejercicio, los ocho estudios mostraron el efecto positivo del ejercicio sobre el BASFI (WMD -0.72 IC 95% [-1.03 a -0.4],  $I^2$  de 0%,  $n = 331$ ).

Y sin importar el tipo de ejercicio seis estudios mostraron el efecto positivo del ejercicio sobre el BASDAI (WMD -0.9 IC 95% [-1.52 a -0.27],  $I^2$  de 69%,  $n$  estudios=264).

Cuatro estudios que incluyeron pacientes con anti-TNF, y evaluaron como intervención ejercicio sin importar el tipo (especifico, supervisado o en casa), mostraron disminución en los puntajes de BASDAI y BASFI con el ejercicio: BASDAI (WMD -1.7 IC 95% [-1.9 a -0.84],  $I^2$  de 0%,  $n= 191$  BASFI (WMD -0.81 IC 95% [-1.25 a 0.38],  $I^2$  de 0%,  $n=191$

## Resumen de la evidencia

### Control enfermedad/remisión/baja actividad de síntomas

La evidencia evaluada sugiere que la terapia física aumenta el efecto sobre el control de la enfermedad de acuerdo con los resultados de las escalas BASDAI. La evidencia para este desenlace es de calidad moderada según GRADE (ver apéndice 2-Tabla GRADE).

## Mejoría de escalas de funcionalidad

La terapia física mostro ser la más efectiva en mostrar una mejoría en las escalas de funcionalidad de BASFI. La evidencia para este desenlace es de calidad moderada según GRADE (ver apéndice 2-Tabla GRADE).

## Calidad de vida

Este desenlace fue evaluado por diferentes estudios con diferentes instrumentos, principalmente el cuestionario de SF-36, mostrando que en general que con la terapia física se obtiene una mejoría de la calidad de vida relacionada con salud. La evidencia para este desenlace es de calidad moderada según GRADE (ver apéndice 2-Tabla GRADE)

## Progresión radiográfica

Ninguno de los estudios evaluados reportó sobre este desenlace

## Preferencia de pacientes

Tres estudios reportaron las preferencias de los pacientes con espondiloartritis axial con relación al ejercicio (13)(14)(15).

Bas Hilberdink (13) quiso evaluar por medio de una encuesta en pacientes con espondiloartritis axial que residían en los países bajos la satisfacción del manejo ambulatorio con ejercicio en grupo supervisado; los pacientes respondían 8 preguntas tipo *Likert* sobre: satisfacción con respecto a intensidad del ejercicio, duración y carga. En total 118 pacientes respondieron, 62% (73/117) estuvo de acuerdo con la implementación de ejercicio más frecuente en casa; 89% (105/118) refirió que prefiere tener supervisión de terapistas especializadas; 75% (84/112) mostraron estar satisfechos con la intensidad del ejercicio, 84% (93/111) con la duración y 76% con la carga del programa, 90% con la proporción de movilidad y 72% con el ejercicio cardiorrespiratorio.

Odwyer (14) condujo en Irlanda un estudio cualitativo de análisis temático, en el que se realizó entrevistas semiestructuradas a pacientes con diagnóstico de espondiloartritis axial, se exploraban acerca de cuatro temas: beneficios, barreras, motivación y estrategias de la actividad física y ejercicio en EA. Se incluyeron 17 pacientes incluidos en un programa de ejercicio, el promedio de edad fue de 39.3 años (DE 9.5). Para el tema de “beneficios”, se identificó el alivio de los síntomas, la mejoría del estado general y mejoría en la calidad de vida. Sobre las barreras, se identificó la falta de recursos, las actitudes negativas hacia el ejercicio e inadecuada información; respecto a la motivación, se documentó que existían diferentes factores intrínsecos y extrínsecos que la influenciaban como: alivio sintomático, salud general, mejoría en la funcionalidad, ver el ejercicio de forma positiva, el impulso personal, red de apoyo social, ejercicio en grupo y la supervisión por profesionales de salud. Respecto a las estrategias y facilitadores, los participantes consideraron que la combinación de manejo farmacológico y ejercicio podía ser la mejor estrategia, y se identificó que en general preferían la prescripción de entrenamientos personalizados y que tuvieran mayor soporte externo, ya que así podría tener mejores resultados.

Curbelo (15) realizó en España un estudio cualitativo empleando grupos focales a fin de establecer barreras y facilitadores en el práctica de ejercicio en pacientes con espondiloartritis axial en manejo ambulatorio, quienes asistían a un hospital universitario de España. Se incluyeron 11 pacientes entre

los 40 y 60 años, la mayoría tenía enfermedad de más de 10 años de evolución y realizaba algún tipo de ejercicio o actividad física. Se identificaron como barreras al ejercicio: la desinformación, miedo, dolor, desconfianza y experiencias previas negativas; como aspectos que facilitan la realización de ejercicio: los complementarios a las barreras más regularidad y apoyo profesional y social. En general los pacientes reclamaron mayor conocimiento y educación sobre el ejercicio y sobre los pros y contras en el contexto de su enfermedad, así como la coherencia de mensajes recibidos de parte del personal de salud.

## Recursos requeridos y costos

Se identificó la revisión sistemática de Gaujoux-Viala 2012 (16) que incluyó un total de 13 estudios, dos de ellos sobre terapia física (17)(18). La calidad metodológica de esta revisión fue evaluada como “aceptable” según la lista de chequeo de AMSTAR. Uno de estos estudios (Van-Tubergen) (17), fue un análisis económico realizado a lo largo de un experimento clínico desarrollado en Austria y los países bajos, que incluyó 111 pacientes con el fin de evaluar la efectividad de la terapia Spa en pacientes con EA. Se midieron costos médicos directos e indirectos (productividad) durante 9 meses de seguimiento a costos de 2002. Este estudio encontró que 3 semanas de ejercicio de tratamiento Spa fue más costo-efectivo que la atención habitual (AINES y ejercicio habitual). La razón costo-efectividad incremental fue EURO7465/QALY (95% CI 3294, 14 686) por tratamiento con ejercicio Spa en Austria and EURO 18 575/QALY (95% CI 3678, 114 257) en lo países bajos. Este estudio fue de buena calidad según la evaluación de su calidad (Drummond check list).

El otro estudio (18) incluido en la RS, fue conducido en Estados Unidos; evaluó la costo-efectividad de la terapia física grupal supervisada (3 horas / semana) en comparación con ejercicios sin supervisión en casa por 9 meses, en 144 pacientes con EA. A costos del año 2003, el análisis identificó que la terapia de fisioterapia grupal redujo costos de la terapia médica en \$ US122. El estudio encontró un aumento adicional del 7% en la movilidad, un aumento adicional del 5% en el estado físico, con un aumento de 28% adicional en el costo de salud global por paciente por año. Después del estudio, el 75% de los pacientes querían continuar grupo fisioterapia y estaban dispuestos a pagar por ello.

El estudio más recientemente publicado, es un estudio presentado como poster en 2017 (19). Tuvo como objetivo evaluar la percepción de calidad de vida y la relación costo/utilidad de un programa de ejercicios en pacientes con espondiloartritis. El estudio incluyó 28 pacientes con EA y los asignó a tres grupos: ejercicio grupal, ejercicio en casa y grupo control. Se encontró que por cada 0.1 de utilidad ganada, la costo-utilidad para el grupo de ejercicio grupal fue de EURO 211.99 /utilidad ganada y para el de ejercicio en casa fue de 49. 1/utilidad ganada, considerándose esta última más favorable. Este estudio no se identificó en texto completo.

## Aceptabilidad de la opción a recomendar

La American College of Rheumatology/ Spondylitis Association en su actualización del 2019 dio tres recomendaciones con respecto a terapias no farmacológicas, recomendando de forma fuerte la terapia física y de forma débil la terapia física realizada en tierra sobre la realizada en agua y las intervenciones activas sobre las pasivas.



## MARCO DE LA EVIDENCIA A LAS DECISIONES

| PREGUNTA               |                                           |
|------------------------|-------------------------------------------|
| POBLACION              | Sujetos con Espondiloartritis axial       |
| INTERVENCIÓN           | Terapias de ejercicio prescrito           |
| COMPARACIÓN            | No ejercicio                              |
| DESENLACES PRINCIPALES | Eficacia y seguridad                      |
| ÁMBITO                 | Ambulatorio                               |
| PERSPECTIVA            | Del grupo desarrollador de la Guía        |
| CONFLICTO DE INTERÉS:  | No se declara ningún conflicto de interés |

## Evaluación

| Problema                                                                                                                                                                                                                       |                                                                                                                                                                                                                                                                                                                                                                                                                                                                                                                                          |                                 |                             |                             |                                            |                                 |                          |                         |            |                            |                             |  |
|--------------------------------------------------------------------------------------------------------------------------------------------------------------------------------------------------------------------------------|------------------------------------------------------------------------------------------------------------------------------------------------------------------------------------------------------------------------------------------------------------------------------------------------------------------------------------------------------------------------------------------------------------------------------------------------------------------------------------------------------------------------------------------|---------------------------------|-----------------------------|-----------------------------|--------------------------------------------|---------------------------------|--------------------------|-------------------------|------------|----------------------------|-----------------------------|--|
| Es el problema una prioridad?                                                                                                                                                                                                  |                                                                                                                                                                                                                                                                                                                                                                                                                                                                                                                                          |                                 |                             |                             |                                            |                                 |                          |                         |            |                            |                             |  |
| JUICIO                                                                                                                                                                                                                         | EVIDENCIA DE LA INVESTIGACION                                                                                                                                                                                                                                                                                                                                                                                                                                                                                                            |                                 |                             | CONSIDERACIONES ADICIONALES |                                            |                                 |                          |                         |            |                            |                             |  |
| <input type="radio"/> No<br><input type="radio"/> Probablemente No<br><input type="radio"/> Probablemente Si<br><input checked="" type="radio"/> Si<br><input type="radio"/> Es variable<br><input type="radio"/> No se conoce | <p>La espondilitis anquilosante (EA) se caracteriza por dolor, alteraciones estructurales y funcionales, como la reducción en la movilidad y la deformidad axial (20), a pesar de su carácter crónico se dispone de diferentes alternativas de tratamiento tanto farmacológico como no farmacológico para aliviar los síntomas, disminuir la progresión de la enfermedad y tratar secuelas. En la actualidad no se recomienda el sedentarismo y los programas de ejercicio son una herramienta fundamental en el manejo de la EA.(1)</p> |                                 |                             |                             |                                            |                                 |                          |                         |            |                            |                             |  |
| Efectos deseables (beneficios de la opción a recomendar)                                                                                                                                                                       |                                                                                                                                                                                                                                                                                                                                                                                                                                                                                                                                          |                                 |                             |                             |                                            |                                 |                          |                         |            |                            |                             |  |
| ¿Qué tan sustanciales son los efectos deseables de la opción?                                                                                                                                                                  |                                                                                                                                                                                                                                                                                                                                                                                                                                                                                                                                          |                                 |                             |                             |                                            |                                 |                          |                         |            |                            |                             |  |
| JUICIO                                                                                                                                                                                                                         | EVIDENCIA DE LA INVESTIGACION                                                                                                                                                                                                                                                                                                                                                                                                                                                                                                            |                                 |                             | CONSIDERACIONES ADICIONALES |                                            |                                 |                          |                         |            |                            |                             |  |
| <input type="radio"/> Triviales<br><input type="radio"/> Pequeños<br><input checked="" type="radio"/> Moderados<br><input type="radio"/> Grandes<br><input type="radio"/> Varían<br><input type="radio"/> No se sabe           | <table border="1"> <thead> <tr> <th>Desenlace</th> <th>Nº de participantes (estudios) seguimiento</th> <th>Certeza en la evidencia (GRADE)</th> <th>Efecto relativo (95% CI)</th> </tr> </thead> <tbody> <tr> <td>Estado de salud: BASDAI</td> <td>95 (1 RCT)</td> <td>⊕⊕⊕○ MODERADO<sup>1</sup></td> <td>MD 14.3 menos (22.64a 5.96)</td> </tr> </tbody> </table>                                                                                                                                                                       |                                 |                             | Desenlace                   | Nº de participantes (estudios) seguimiento | Certeza en la evidencia (GRADE) | Efecto relativo (95% CI) | Estado de salud: BASDAI | 95 (1 RCT) | ⊕⊕⊕○ MODERADO <sup>1</sup> | MD 14.3 menos (22.64a 5.96) |  |
| Desenlace                                                                                                                                                                                                                      | Nº de participantes (estudios) seguimiento                                                                                                                                                                                                                                                                                                                                                                                                                                                                                               | Certeza en la evidencia (GRADE) | Efecto relativo (95% CI)    |                             |                                            |                                 |                          |                         |            |                            |                             |  |
| Estado de salud: BASDAI                                                                                                                                                                                                        | 95 (1 RCT)                                                                                                                                                                                                                                                                                                                                                                                                                                                                                                                               | ⊕⊕⊕○ MODERADO <sup>1</sup>      | MD 14.3 menos (22.64a 5.96) |                             |                                            |                                 |                          |                         |            |                            |                             |  |

|  |                                                                                                                                         |               |                               |                             |  |
|--|-----------------------------------------------------------------------------------------------------------------------------------------|---------------|-------------------------------|-----------------------------|--|
|  | Estado funcional:<br>BASFI                                                                                                              | 95<br>(1 RCT) | ⊕⊕○○<br>BAJO <sup>1,2</sup>   | MD 6 menos (12.82 l a 0.82) |  |
|  | Calidad de vida evaluado con SF-36                                                                                                      | 95<br>(1 RCT) | ⊕⊕⊕○<br>MODERADO <sup>1</sup> | MD 2.2 mayor (4.48 a 8.88)  |  |
|  | <sup>1</sup> Riesgo de sesgo serio (asignación aleatoria no clara, muestra pequeña por conveniencia).<br><sup>2</sup> sería Imprecisión |               |                               |                             |  |

Efectos Indeseables

¿Qué tan sustanciales son los efectos indeseables que se pueden anticipar?

|                                                                                                                                                       |                               |                             |
|-------------------------------------------------------------------------------------------------------------------------------------------------------|-------------------------------|-----------------------------|
| JUICIO                                                                                                                                                | EVIDENCIA DE LA INVESTIGACION | CONSIDERACIONES ADICIONALES |
| <div><div>○ Triviales</div><div><div>○ Pequeños</div><div>○ Moderados</div><div>○ Grandes</div><div>○ Varían</div><div>○ No se sabe</div></div></div> |                               |                             |

Certeza en la Evidencia

¿Cuál es la certeza en la evidencia global sobre los efectos de la opción a recomendar?

|        |                               |                             |
|--------|-------------------------------|-----------------------------|
| JUICIO | EVIDENCIA DE LA INVESTIGACION | CONSIDERACIONES ADICIONALES |
|        |                               |                             |

| <ul style="list-style-type: none"> <li>o Muy baja</li> <li>o Baja</li> <li><b>o Moderada</b></li> <li>o Alta</li> <li>o No se identificaron estudios</li> </ul>                                                                                                                                         | <table border="1"> <thead> <tr> <th data-bbox="621 285 999 391">Desenlace</th> <th data-bbox="999 285 1230 391">Importancia relativa</th> <th data-bbox="1230 285 1503 391">Certeza en la evidencia (GRADE)</th> </tr> </thead> <tbody> <tr> <td data-bbox="621 391 999 496">Estado de salud: BASDAI</td> <td data-bbox="999 391 1230 496">CRITICAL</td> <td data-bbox="1230 391 1503 496">⊕⊕⊕○<br/>MODERADA</td> </tr> <tr> <td data-bbox="621 496 999 602">Estado funcional: BASFI</td> <td data-bbox="999 496 1230 602">CRITICAL</td> <td data-bbox="1230 496 1503 602">⊕⊕○○<br/>BAJA<sup>1</sup></td> </tr> <tr> <td data-bbox="621 602 999 708">Calidad de vida evaluada con SF-36</td> <td data-bbox="999 602 1230 708">CRITICAL</td> <td data-bbox="1230 602 1503 708">⊕⊕⊕○<br/>MODERADO</td> </tr> </tbody> </table> | Desenlace                          | Importancia relativa | Certeza en la evidencia (GRADE) | Estado de salud: BASDAI | CRITICAL | ⊕⊕⊕○<br>MODERADA | Estado funcional: BASFI | CRITICAL | ⊕⊕○○<br>BAJA <sup>1</sup> | Calidad de vida evaluada con SF-36 | CRITICAL | ⊕⊕⊕○<br>MODERADO |  |
|---------------------------------------------------------------------------------------------------------------------------------------------------------------------------------------------------------------------------------------------------------------------------------------------------------|------------------------------------------------------------------------------------------------------------------------------------------------------------------------------------------------------------------------------------------------------------------------------------------------------------------------------------------------------------------------------------------------------------------------------------------------------------------------------------------------------------------------------------------------------------------------------------------------------------------------------------------------------------------------------------------------------------------------------------------------------------------------------------------------------------------------------|------------------------------------|----------------------|---------------------------------|-------------------------|----------|------------------|-------------------------|----------|---------------------------|------------------------------------|----------|------------------|--|
| Desenlace                                                                                                                                                                                                                                                                                               | Importancia relativa                                                                                                                                                                                                                                                                                                                                                                                                                                                                                                                                                                                                                                                                                                                                                                                                         | Certeza en la evidencia (GRADE)    |                      |                                 |                         |          |                  |                         |          |                           |                                    |          |                  |  |
| Estado de salud: BASDAI                                                                                                                                                                                                                                                                                 | CRITICAL                                                                                                                                                                                                                                                                                                                                                                                                                                                                                                                                                                                                                                                                                                                                                                                                                     | ⊕⊕⊕○<br>MODERADA                   |                      |                                 |                         |          |                  |                         |          |                           |                                    |          |                  |  |
| Estado funcional: BASFI                                                                                                                                                                                                                                                                                 | CRITICAL                                                                                                                                                                                                                                                                                                                                                                                                                                                                                                                                                                                                                                                                                                                                                                                                                     | ⊕⊕○○<br>BAJA <sup>1</sup>          |                      |                                 |                         |          |                  |                         |          |                           |                                    |          |                  |  |
| Calidad de vida evaluada con SF-36                                                                                                                                                                                                                                                                      | CRITICAL                                                                                                                                                                                                                                                                                                                                                                                                                                                                                                                                                                                                                                                                                                                                                                                                                     | ⊕⊕⊕○<br>MODERADO                   |                      |                                 |                         |          |                  |                         |          |                           |                                    |          |                  |  |
| <h3>Valores de los pacientes</h3> <p>¿Hay variación o poca certeza sobre cómo valoran las personas/los pacientes los desenlaces principales?</p>                                                                                                                                                        |                                                                                                                                                                                                                                                                                                                                                                                                                                                                                                                                                                                                                                                                                                                                                                                                                              |                                    |                      |                                 |                         |          |                  |                         |          |                           |                                    |          |                  |  |
| <b>JUICIO</b>                                                                                                                                                                                                                                                                                           | <b>EVIDENCIA DE LA INVESTIGACION</b>                                                                                                                                                                                                                                                                                                                                                                                                                                                                                                                                                                                                                                                                                                                                                                                         | <b>CONSIDERACIONES ADICIONALES</b> |                      |                                 |                         |          |                  |                         |          |                           |                                    |          |                  |  |
| <ul style="list-style-type: none"> <li>o Variabilidad o incertidumbre importante</li> <li>o Posiblemente hay variabilidad o incertidumbre importante</li> <li><b>o Posiblemente No hay variabilidad o incertidumbre importante</b></li> <li>o No hay variabilidad o incertidumbre importante</li> </ul> | <p>No hay evidencia</p>                                                                                                                                                                                                                                                                                                                                                                                                                                                                                                                                                                                                                                                                                                                                                                                                      |                                    |                      |                                 |                         |          |                  |                         |          |                           |                                    |          |                  |  |
| <h3>Balance de los efectos</h3> <p>¿El balance entre los efectos deseables e indeseables favorece la opción o el comparador?</p>                                                                                                                                                                        |                                                                                                                                                                                                                                                                                                                                                                                                                                                                                                                                                                                                                                                                                                                                                                                                                              |                                    |                      |                                 |                         |          |                  |                         |          |                           |                                    |          |                  |  |
| <b>JUICIO</b>                                                                                                                                                                                                                                                                                           | <b>EVIDENCIA DE LA INVESTIGACION</b>                                                                                                                                                                                                                                                                                                                                                                                                                                                                                                                                                                                                                                                                                                                                                                                         | <b>CONSIDERACIONES ADICIONALES</b> |                      |                                 |                         |          |                  |                         |          |                           |                                    |          |                  |  |

|                                                                                                                                                                                                                                                                                                                        |                                                                                                                                                                                                                                                                                                                                     |                             |
|------------------------------------------------------------------------------------------------------------------------------------------------------------------------------------------------------------------------------------------------------------------------------------------------------------------------|-------------------------------------------------------------------------------------------------------------------------------------------------------------------------------------------------------------------------------------------------------------------------------------------------------------------------------------|-----------------------------|
| <ul style="list-style-type: none"> <li>○ Favorece al comparador</li> <li>○ Probablemente favorece al comparador</li> <li>○ No favorece al comparador ni a la opción en evaluación</li> <li>○ Probablemente favorece a la opción</li> <li>○ Favorece la intervención</li> <li>○ Varían</li> <li>○ No se sabe</li> </ul> |                                                                                                                                                                                                                                                                                                                                     |                             |
| <h3>Recursos requeridos</h3> <p>Que tan grande es el requerimiento de recursos (costos)?</p>                                                                                                                                                                                                                           |                                                                                                                                                                                                                                                                                                                                     |                             |
| JUICIO                                                                                                                                                                                                                                                                                                                 | EVIDENCIA DE LA INVESTIGACIÓN                                                                                                                                                                                                                                                                                                       | CONSIDERACIONES ADICIONALES |
| <ul style="list-style-type: none"> <li>○ Grandes costos</li> <li>○ Costos moderados</li> <li>○ no significantes costos ni ahorros</li> <li>○ Moderados ahorros</li> <li>○ Grandes ahorros</li> <li>○ Varían</li> <li>○ No se sabe</li> </ul>                                                                           | <p>Se identifico un estudio publicado como poster en Congreso, en el cual se encontró que:</p> <p>Para el grupo de ejercicio por cada 0.1 utilidad ganada, el costo incrementaba en 211.99 euros</p> <p>Para el de ejercicio en casa fue de 49.1 euros por medida de utilidad ganada, considerándose esta última más favorable.</p> |                             |
| <h3>Equidad</h3> <p>¿La implementación de la opción, tendrá impacto en la equidad?</p>                                                                                                                                                                                                                                 |                                                                                                                                                                                                                                                                                                                                     |                             |
| JUICIO                                                                                                                                                                                                                                                                                                                 | EVIDENCIA DE LA INVESTIGACION                                                                                                                                                                                                                                                                                                       | CONSIDERACIONES ADICIONALES |

|                                                                                                                                                                                                                                                                                                                             |                                                                                                                                                                                                                                                                                                                                                |                             |
|-----------------------------------------------------------------------------------------------------------------------------------------------------------------------------------------------------------------------------------------------------------------------------------------------------------------------------|------------------------------------------------------------------------------------------------------------------------------------------------------------------------------------------------------------------------------------------------------------------------------------------------------------------------------------------------|-----------------------------|
| <input type="radio"/> Reducir<br><input type="radio"/> Probablemente se reduce la equidad<br><input type="radio"/> Probablemente no impacta la equidad<br><input type="radio"/> Probablemente incrementa<br><input type="radio"/> Incrementa<br><input type="radio"/> Varían<br><input checked="" type="radio"/> No se sabe | No se encontró evidencia con respecto a equidad                                                                                                                                                                                                                                                                                                |                             |
| <h3>Aceptabilidad</h3> <p>¿Es la opción aceptada por los diferentes actores involucrados en su implementación?</p>                                                                                                                                                                                                          |                                                                                                                                                                                                                                                                                                                                                |                             |
| JUICIO                                                                                                                                                                                                                                                                                                                      | EVIDENCIA DE LA INVESTIGACION                                                                                                                                                                                                                                                                                                                  | CONSIDERACIONES ADICIONALES |
| <input type="radio"/> No<br><input type="radio"/> Probablemente no<br><input checked="" type="radio"/> Probablemente si<br><input type="radio"/> Si<br><input type="radio"/> Varían<br><input type="radio"/> No se sabe                                                                                                     | La American College of Rheumatology/ Spondylitis Association en su actualización del 2019 dio tres recomendaciones con respecto a terapias no farmacológicas, recomendando de forma fuerte la terapia física y de forma débil la terapia física realizada en tierra sobre la realizada en agua y las intervenciones activas sobre las pasivas. |                             |
| <h3>Factibilidad</h3> <p>¿Es la opción factible de IMPLEMENTAR?</p>                                                                                                                                                                                                                                                         |                                                                                                                                                                                                                                                                                                                                                |                             |
| JUICIO                                                                                                                                                                                                                                                                                                                      | EVIDENCIA DE LA INVESTIGACION                                                                                                                                                                                                                                                                                                                  | CONSIDERACIONES ADICIONALES |
| <input type="radio"/> No<br><input type="radio"/> Probablemente no<br><input type="radio"/> Probablemente si<br><input type="radio"/> Si<br><input type="radio"/> Varían<br><input checked="" type="radio"/> No se sabe                                                                                                     | No se identificaron estudios                                                                                                                                                                                                                                                                                                                   |                             |

## Resumen de Juicios

|                         | JUICIOS                                 |                                                      |                                                          |                                            |                            |        |                        |
|-------------------------|-----------------------------------------|------------------------------------------------------|----------------------------------------------------------|--------------------------------------------|----------------------------|--------|------------------------|
| PROBLEMA                | No                                      | Probablemente No                                     | Probablemente si                                         | Si                                         |                            | Varían | No se sabe             |
| EFFECTOS DESEABLES      | Triviales                               | Pequeños                                             | Moderados                                                | Grandes                                    |                            | Varían | No se sabe             |
| EFFECTOS INDESEABLES    | Grandes                                 | Moderados                                            | Pequeños                                                 | Triviales                                  |                            | Varían | No se sabe             |
| CERTEZA EN LA EVIDENCIA | Muy baja                                | Baja                                                 | Moderada                                                 | Alta                                       |                            |        | No incluyeron estudios |
| VALORES DE PACIENTES    | Importante incertidumbre o variabilidad | Posiblemente Importante incertidumbre o variabilidad | Probablemente no Importante incertidumbre o variabilidad | No Importante incertidumbre o variabilidad |                            |        |                        |
| BALANCE DE LOS EFECTOS  | Favorece al comparador                  | Probablemente favorece al comparador                 | No favorece ni a la intervención ni al comparador        | Probablemente favorece a la intervención   | Favorece a la intervención | Varían | No se sabe             |
| RECURSOS REQUERIDOS     | Grandes costos                          | Costos Moderados                                     | Costos y ahorros insignificantes                         | Moderados ahorros                          | Grandes Ahorros            | Varían | No se sabe             |
| EQUIDAD                 | Reducida                                | Probablemente reducida                               | Probablemente no impactada                               | Probablemente incrementada                 | Incrementada               | Varían | No se sabe             |
| ACEPTABILIDAD           | No                                      | Probablemente No                                     | Probablemente Si                                         | Si                                         |                            | Varían | No se sabe             |
| FACTIBILIDAD            | No                                      | Probablemente No                                     | Probablemente Si                                         | Si                                         |                            | Varían | No se sabe             |

## Tipo de Recomendación

|                                             |                                                  |                                                                           |                                                |                                           |
|---------------------------------------------|--------------------------------------------------|---------------------------------------------------------------------------|------------------------------------------------|-------------------------------------------|
| Recomendación fuerte en contra de la opción | Recomendación condicional en contra de la opción | Recomendación condicional a favor de cualquiera la opción o su comparador | Recomendación condicional a favor de la opción | Recomendación fuerte a favor de la opción |
| ○                                           | ○                                                | ○                                                                         | ○                                              | ○                                         |

## Conclusiones

### Recomendación:

Se recomienda la prescripción del ejercicio como parte del tratamiento usual de pacientes con EspAax. Recomendación fuerte a favor. Evidencia moderada.

Se recomienda la Terapia física en pacientes con EspAax. Recomendación fuerte a favor. Evidencia moderada.

Se sugiere la terapia ocupacional en pacientes con EspAax. Recomendación condicional a favor. Evidencia baja

### Puntos de buena Práctica:

El panel considera priorizar el ejercicio en tierra sobre el ejercicio en agua por factibilidad de realizarlo por largo tiempo

El panel considera que la prescripción de la terapia física sea realizada idealmente por profesionales capacitados para este fin (especialista en medicina física y rehabilitación, especialista en medicina del deporte)

### Justificación



La evidencia de ensayos clínicos y metaanálisis han mostrado el impacto positivo de la terapia física, el ejercicio tanto en tierra como en agua y la terapia ocupacional en el estado de salud, el estado funcional y la calidad de vida de los pacientes con espondiloartritis axial, con aceptabilidad de la intervención por parte de los pacientes.

#### Consideraciones por subgrupos:

No hay consideraciones especiales para subgrupos. Es aplicable a todos los tipos e Espondiloartritis, igualmente la ventaja de la nueva clasificación (Axial o Periférica) permite agrupar todos los tipos de pacientes y el impacto es similar para todos ellos.

#### Consideraciones de implementación

Se debe plantear como manejo de primera línea en un paciente con diagnóstico de Espondiloartritis axial, de la mano con las medidas de intervención farmacológicas

#### Monitoreo y evaluación de cumplimiento

Se requiere realizar seguimiento de los pacientes en la consulta verificando mejoría en desenlaces como dolor y un adecuado control de la enfermedad evaluado por medio de clinimetría.

#### Prioridades de investigación futura:

Con respecto a la terapia ocupacional existe un vacío en la evidencia y es necesario la conducción de ensayos clínicos aleatorizados.

## APÉNDICE 1. Tablas GRADE (3)(4)

Pregunta: ¿En pacientes adultos con Espondiloartritis Axial qué tan eficaz (control enfermedad, remisión/baja actividad de síntomas, mejoría de escalas de funcionalidad y calidad de vida, progresión radiográfica) y seguro (eventos adversos) es el manejo no farmacológico: 1- Terapia física

Resumen: Esta pregunta fue abordada directamente por 2 ECA pequeños con alto riesgo de sesgo. Hubo algunas diferencias significativas entre los grupos, con 3 de los desenlaces a favor de la intervención, con amplios intervalos de confianza. Calidad de la evidencia en todos los resultados críticos: Moderada ⊕⊕⊕○

| Evaluación de calidad                                                                                                                       |        |                 |                         |                       |                      |                       | No de pacientes |            | Efecto            |                                     | Calidad          | Importancia |
|---------------------------------------------------------------------------------------------------------------------------------------------|--------|-----------------|-------------------------|-----------------------|----------------------|-----------------------|-----------------|------------|-------------------|-------------------------------------|------------------|-------------|
| No de estudios                                                                                                                              | Diseño | Riesgo de sesgo | Inconsistencia (I²)     | Indirectness          | Imprecisión          | Otras consideraciones | Cualquier PT    | Control: P | Relativo (95% CI) | Absoluto                            |                  |             |
| Control de la enfermedad: BASDAI (tiempo promedio de seguimiento 12 semanas; valores más bajos indican mejor control)                       |        |                 |                         |                       |                      |                       |                 |            |                   |                                     |                  |             |
| 1                                                                                                                                           | ECA    | serio¹          | no seria inconsistencia | no seria indirectness | no seria imprecisión | no                    | 46              | 49         | -                 | MD 14.3 bajo (22.64 a 5.96 bajo)    | ⊕⊕⊕○<br>Moderada | Ccrítica    |
| Funcionalidad: BASFI (tiempo promedio de seguimiento 12 semanas; valores más bajos indican mejor control)                                   |        |                 |                         |                       |                      |                       |                 |            |                   |                                     |                  |             |
| 1                                                                                                                                           | ECA    | serio¹          | no seria inconsistencia | no seria indirectness | no seria imprecisión | no                    | 46              | 49         | -                 | MD 6 bajo (12.82 bajo a 0.82 alto)  | ⊕⊕⊕○<br>Moderada | Crítica     |
| Calidad de vida: SF-36 physical - role physical (tiempo promedio de seguimiento 12 semanas; valores altos indican mejor calidad de vida)    |        |                 |                         |                       |                      |                       |                 |            |                   |                                     |                  |             |
| 1                                                                                                                                           | ECA    | serio¹          | no seria inconsistencia | no seria indirectness | no seria imprecisión | no                    | 46              | 49         | -                 | MD 11.8 alto (2.02 a 21.58 alto)    | ⊕⊕⊕○<br>Moderada | Importante  |
| Calidad de vida: SF-36 physical -physical function (tiempo promedio de seguimiento 12 semanas; valores altos indican mejor calidad de vida) |        |                 |                         |                       |                      |                       |                 |            |                   |                                     |                  |             |
| 1                                                                                                                                           | ECA    | serio¹          | no seria inconsistencia | no seria indirectness | no seria imprecisión | No                    | 46              | 49         | -                 | MD 2.2 alto (4.48 bajo a 8.88 alto) | ⊕⊕⊕○<br>Moderada | Importante  |

<sup>1</sup> Los estudios Kjekken y Bulstrode presentan serio riesgo de sesgo.

## Referencias

1. Wang C-Y, Chiang P-Y, Lee H-S, Wei JC-C. The effectiveness of exercise therapy for ankylosing spondylitis: a review. *Int J Rheum Dis*. septiembre de 2009;12(3):207-10.
2. Ward MM, Deodhar A, Gensler LS, Dubreuil M, Yu D, Khan MA, et al. 2019 Update of the American College of Rheumatology/Spondylitis Association of America/Spondyloarthritis Research and Treatment Network Recommendations for the Treatment of Ankylosing Spondylitis and Nonradiographic Axial Spondyloarthritis. *Arthritis Care Res*. 2019;71(10):1285-99.
3. Kjekken I, Bø I, Rønningen A, Spada C, Mowinckel P, Hagen KB, et al. A three-week multidisciplinary in-patient rehabilitation programme had positive long-term effects in patients with ankylosing spondylitis: randomized controlled trial. *J Rehabil Med*. marzo de 2013;45(3):260-7.
4. Bulstrode SJ, Barefoot J, Harrison RA, Clarke AK. The role of passive stretching in the treatment of ankylosing spondylitis. *Br J Rheumatol*. febrero de 1987;26(1):40-2.
5. Spadaro A, De Luca T, Massimiani MP, Ceccarelli F, Riccieri V, Valesini G. Occupational therapy in ankylosing spondylitis: Short-term prospective study in patients treated with anti-TNF-alpha drugs. *Joint Bone Spine*. enero de 2008;75(1):29-33.
6. Zão A, Cantista P. The role of land and aquatic exercise in ankylosing spondylitis: a systematic review. *Rheumatol Int*. diciembre de 2017;37(12):1979-90.
7. Shea BJ, Grimshaw JM, Wells GA, Boers M, Andersson N, Hamel C, et al. Development of AMSTAR: a measurement tool to assess the methodological quality of systematic reviews. *BMC Med Res Methodol*. 15 de febrero de 2007;7:10.
8. Fernández García R, Sánchez Sánchez L de C, López Rodríguez MDM, Sánchez Granados G. [Effects of an exercise and relaxation aquatic program in patients with spondyloarthritis: A randomized trial]. *Med Clin (Barc)*. 6 de noviembre de 2015;145(9):380-4.
9. Ciprian L, Lo Nigro A, Rizzo M, Gava A, Ramonda R, Punzi L, et al. The effects of combined spa therapy and rehabilitation on patients with ankylosing spondylitis being treated with TNF inhibitors. *Rheumatol Int*. enero de 2013;33(1):241-5.
10. Dundar U, Solak O, Toktas H, Demirdal US, Subasi V, Kavuncu V, et al. Effect of aquatic exercise on ankylosing spondylitis: a randomized controlled trial. *Rheumatol Int*. noviembre de 2014;34(11):1505-11.
11. Karapolat H, Eyigor S, Zoghi M, Akkoc Y, Kirazli Y, Keser G. Are swimming or aerobic exercise better than conventional exercise in ankylosing spondylitis patients? A randomized controlled study. *Eur J Phys Rehabil Med*. diciembre de 2009;45(4):449-57.
12. Pécourneau V, Degboé Y, Barnetche T, Cantagrel A, Constantin A, Ruysen-Witrand A. Effectiveness of Exercise Programs in Ankylosing Spondylitis: A Meta-Analysis of Randomized Controlled Trials. *Arch Phys Med Rehabil*. 2018;99(2):383-389.e1.

13. Hilberdink B, Giesen F van der, Vlieland TV, Gaalen F van, Weely S van. Supervised Group Exercise in Axial Spondyloarthritis: Patients' Satisfaction and Perspective on Evidence-Based Enhancements. *Arthritis Care Res [Internet]*. [citado 5 de abril de 2020];n/a(n/a). Disponible en: <https://onlinelibrary.wiley.com/doi/abs/10.1002/acr.23892>
14. O'Dwyer T, McGowan E, O'Shea F, Wilson F. Physical Activity and Exercise: Perspectives of Adults With Ankylosing Spondylitis. *J Phys Act Health*. 2016;13(5):504-13.
15. Curbelo Rodríguez R, Zarco Montejó P, Almodóvar González R, Flórez García M, Carmona Ortells L. Barreras y facilitadores para la práctica del ejercicio físico en pacientes con espondiloartritis: estudio cualitativo de grupos focales (EJES-3D). *Reumatol Clínica [Internet]*. 1 de marzo de 2017 [citado 8 de abril de 2020];13(2):91-6. Disponible en: <http://www.reumatologiaclinica.org/es-barreras-facilitadores-practica-del-ejercicio-articulo-S1699258X16000486>
16. Gaujoux-Viala C, Fautrel B. Cost Effectiveness of Therapeutic Interventions in Ankylosing Spondylitis. *PharmacoEconomics [Internet]*. 1 de diciembre de 2012 [citado 11 de mayo de 2020];30(12):1145-56. Disponible en: <https://doi.org/10.2165/11596490-000000000-00000>
17. Van Tubergen A, Boonen A, Landewé R, Rutten-Van Mölken M, Van Der Heijde D, Hidding A, et al. Cost effectiveness of combined spa-exercise therapy in ankylosing spondylitis: a randomized controlled trial. *Arthritis Rheum*. 15 de octubre de 2002;47(5):459-67.
18. Bakker C, Hidding A, van der Linden S, van Doorslaer E. Cost effectiveness of group physical therapy compared to individualized therapy for ankylosing spondylitis. A randomized controlled trial. *J Rheumatol*. febrero de 1994;21(2):264-8.
19. Lopes S, Mesquita C, Santos P. Exercise in ankylosing spondylitis: quality of life and cost/utility. *Physiotherapy [Internet]*. 1 de diciembre de 2017 [citado 8 de abril de 2020];103:e129. Disponible en: [https://www.physiotherapyjournal.com/article/S0031-9406\(17\)30233-X/abstract](https://www.physiotherapyjournal.com/article/S0031-9406(17)30233-X/abstract)
20. Smith JA. Update on ankylosing spondylitis: current concepts in pathogenesis. *Curr Allergy Asthma Rep*. enero de 2015;15(1):489.

## Pregunta 10:

¿En pacientes adultos con Espondiloartritis Axial qué tan eficaz (control enfermedad, remisión/baja actividad de síntomas, mejoría de escalas de funcionalidad y calidad de vida, progresión radiográfica) y seguro (eventos adversos) es el manejo no farmacológico con terapias no convencionales (1- Acupuntura 2- Pilates 3- Terapia Neural 4- Yoga 5- Reiki)?

|                     |                                                                                                                                                                            |
|---------------------|----------------------------------------------------------------------------------------------------------------------------------------------------------------------------|
| <b>Población</b>    | Pacientes con espondiloartritis axial (EspAax)                                                                                                                             |
| <b>Intervención</b> | 1- Acupuntura 2- pilates 3- terapia neural 4- yoga 5- reiki                                                                                                                |
| <b>Comparación</b>  | Cuidado estándar/placebo                                                                                                                                                   |
| <b>Desenlaces</b>   | Control de enfermedad /remisión/baja actividad de síntomas<br>mejoría de escalas de funcionalidad, calidad de vida, progresión radiográfica y seguridad (eventos adversos) |

## Antecedentes

La Espondiloartritis axial (EspAax) es una forma de artritis inflamatoria crónica caracterizada por entesis y una marcada propensión por la articulación sacroilíaca y la fusión espinal(1) La Espondiloartritis axial es una enfermedad dentro de la familia de espondiloartritis, la cual comparte varias características clínicas, genéticas, e inmunológicas. (2). La EspAax se distingue dentro de esta familia por el compromiso inflamatorio de las articulaciones sacro-iliacas o fusión de las mismas y mayor prevalencia de anquilosis espinal. (3); estos cambios sacroilíacos más avanzados constituyen el core de los criterios modificados de New York para la clasificación de la (EspAax) (4). Los hallazgos radiográficos pueden tomar años en aparecer, lo cual limita este criterio de clasificación por que potencialmente excluye pacientes con esta enfermedad en fases tempranas. Recientemente ASAS (the Assessment of SpondyloArthritis international Society) propuso un criterio de clasificación que aplica a pacientes en ambos estadios de la enfermedad (tempranos y tardíos), incluyéndolos bajo la sombrilla del término Espondiloartritis Axial (EspAax) (5). En esta clasificación, la designación “Espondiloartritis axial no radiográfica” (EspAax-nr) abarca a los pacientes que tienen dolor lumbar de características inflamatorias de más de tres meses de evolución. Los objetivos del tratamiento de la EspAax y de la EspAax-nr son reducir los síntomas, controlar actividad de la enfermedad, disminuir la limitación funcional y mejorar calidad de vida.

## Evidencia

La búsqueda de la literatura realizada para Acupuntura, Terapia Neural, Pilates, Yoga y Reiki (ver anexo-Excel) identificó 75 resultados, de los cuales 8 corresponden a revisiones sistemáticas y metaanálisis.

## Acupuntura

La literatura en la cual se soporta el análisis corresponde a 3 Revisiones Sistemáticas “Efficacy of acupuncture in rheumatic diseases with spine involvement: Systematic Review” (6), “Acupuncture Therapy versus Disease-modifying Antirheumatic Drugs for the Treatment of Ankylosing Spondylitis--a Meta-analysis”. (7), “Akupunktur bei der Behandlung entzündlich-rheumatischer Erkrankungen” (8)

Las enfermedades reumáticas que afectan la columna vertebral, principalmente la columna cervical y lumbar, son altamente prevalentes y consumen considerables recursos de salud. La acupuntura es un procedimiento médico avalado por la OMS, con un amplio espectro de aplicaciones médicas. El objetivo del primero de los estudios “Efficacy of acupuncture in rheumatic diseases with spine involvement: Systematic Review” fue revisar la evidencia sobre la eficacia de la acupuntura en estas enfermedades. La acupuntura demostró ser eficaz en el tratamiento del dolor lumbar agudo y crónico como la primera línea terapéutica, en comparación con el placebo, y como complemento de otros tratamientos convencionales. La acupuntura parece ser una intervención segura. Sin embargo, la eficacia de la acupuntura en Espondiloartritis axial aún no es concluyente. Se requieren estudios bien diseñados con evaluación a mediano y largo plazo. En el segundo estudio “Acupuncture Therapy versus Disease-modifying Antirheumatic Drugs for the Treatment of Ankylosing Spondylitis--a Meta-analysis” se condujo un metaanálisis que evaluó la eficacia y la seguridad de la acupuntura comparada con DMARDS en pacientes con Espondiloartritis axial. Los hallazgos respaldan que la acupuntura podría ser una opción para aliviar los síntomas asociados con Espondiloartritis axial. Estos resultados deberían ser interpretados con cautela debido a las fallas metodológicas de los estudios incluidos. En el tercer estudio incluido en este análisis “Akupunktur bei der Behandlung entzündlich-rheumatischer Erkrankungen” se examinaron diecisiete estudios con respecto a la eficacia y la calidad científica de la acupuntura en la artritis reumatoide, la espondartropatía, el lupus eritematoso, la esclerodermia sistémica local y progresiva. Concluyen los autores, que la acupuntura no se puede recomendar para el tratamiento de estas enfermedades. La mayoría de los estudios examinados no lograron demostrar una calidad suficiente.

## Pilates

La literatura recabada corresponde a dos revisiones sistemáticas, “¿Is Pilates an effective rehabilitation tool? A systematic review” (9) and “The Pilates method in the rehabilitation of musculoskeletal disorders: a systematic review” (10), 1 metaanálisis “Effectiveness of Exercise Programs in Ankylosing Spondylitis: A Meta-Analysis of Randomized Controlled Trials”(11) un estudio quasi experimental “One Year of Pilates Training for Ankylosing Spondylitis: A Pilot Study” (12), y dos estudios clínicos aleatorizados “Effects of Pilates, McKenzie and Heckscher training on disease activity, spinal motility and pulmonary function in patients with ankylosing spondylitis: a randomized controlled trial” (13), Effect of Pilates training on people with ankylosing spondylitis” (14).

El estudio “Is Pilates an effective rehabilitation tool? A systematic review” (9) evalúa la eficacia de la práctica de Pilates en el proceso de rehabilitación en pacientes con dolor de la espalda baja, Espondiloartritis axial, esclerosis múltiple, osteoporosis postmenopáusica, escoliosis no estructural, hipertensión y dolor crónico del cuello. Se incluyeron en esta revisión 23 estudios aleatorizados controlados con un total de 1120 pacientes.

Solo dos de los estudios incluidos en esta revisión están relacionados con la Espondiloartritis axial (Altan et al 2012) (14) y (Roşu et al 2014) (13).

El resultado de la mayoría de los estudios incluidos en esta revisión (19 de 23) muestra que la práctica de Pilates fue beneficiosa al mejorar las medidas de desenlace tales como dolor y discapacidad comparado con el grupo control. Se evidencia en este estudio una falta de uniformidad en la calidad de los estudios, la metodología utilizada, los comparadores y la prescripción del ejercicio. Esto hace difícil la comparación de los estudios y analizar su significancia. Los autores concluyen que la práctica de Pilates como herramienta de rehabilitación ha mostrado ser efectiva particularmente para reducir el dolor y mejorar funcionalidad.

El estudio de Altan et al (Altan et al 2012) (14) es un estudio pequeño ( $n=55$ ) que comparó la práctica de Pilates con un grupo control que continuaba con su rutina normal. El estudio encontró que la práctica de Pilates mejoraba significativamente el BASFI (Bath Ankylosing Spondylitis Functional Index) a la semana 12 ( $P=0.031$ ) y a la semana 24 ( $P=0.007$ ) comparado con el grupo control. Sus autores reconocen como debilidad del estudio el pequeño número de participantes y el corto seguimiento.

El estudio de Rosu et al (Roşu et al 2014) (13) es un estudio open label ( $n=96$ ), que combinó 3 programas: Pilates, McKenzie y Heckscher comparándolos con un programa Kinético estándar. El objetivo principal de este estudio fue mejoría de la función pulmonar. Este estudio mostró mejoría significativa ( $P=0.001$ ) en todos los desenlaces medidos para ambos grupos. El puntaje asignado de acuerdo con la evaluación CONSORT, fue de 19/24 para el estudio de (Altan et al 2012) (14) y de 7/24. Para el estudio de (Roşu et al 2014) (13). En la escala PEDro, el estudio de (Altan et al 2012) (14) puntuó 7/10 y el de (Roşu et al 2014) (13) 5/10.

La revisión sistemática "The Pilates method in the rehabilitation of musculoskeletal disorders: a systematic review" (10) incluyó 14 estudios, de los cuales solo uno (Altan et al 2012) (14) tiene como población pacientes con Espondiloartritis axial. Esta revisión concluye que la práctica de Pilates puede ser efectiva para el tratamiento de condiciones como la escoliosis, el dolor de espalda, la Espondiloartritis axial y el cáncer de seno pero que la alta variabilidad metodológica requiere que los estudios sean vistos con precaución. Es necesario realizar nuevos estudios de alta calidad metodológica y con instrumentos estandarizados.

El estudio "One Year of Pilates Training for Ankylosing Spondylitis: A Pilot Study" (12) es un estudio quasi experimental de un solo brazo con un  $n=11$ . Sus hallazgos sugieren que la práctica de Pilates podría ser útil en pacientes con Espondiloartritis axial.

El estudio "Effectiveness of Exercise Programs in Ankylosing Spondylitis: A Meta-Analysis of Randomized Controlled Trials" (11) incluyó 8 estudios, de los cuales solo uno es en población con Espondiloartritis axial tratada con Pilates (Altan et al 2012) (14). La conclusión de esta revisión es que a pesar del pequeño número de pacientes ( $n=331$ ) y la heterogeneidad de programas de ejercicio de los estudios clínicos incluidos en este metaanálisis, los resultados soportan el potencial que tienen los programas de ejercicio para mejorar la actividad de la enfermedad medida con (BASDAI and BASFI) y la función corporal en pacientes con Espondiloartritis axial.

## Terapia Neural (TENS)

Se identificó solo un estudio “A retrospective study of transcutaneous electrical nerve stimulation for chronic pain following ankylosing spondylitis” (15). Este es un estudio histórico que analizó datos de 72 pacientes con dolor crónico secundario a Espondiloartritis axial. El desenlace primario fue intensidad del dolor medido mediante una escala visual análoga (VAS). Los desenlaces secundarios incluyen el grado de limitación funcional evaluada por el “Bath Ankylosing Spondylitis Functional Index” (BASFI), y la calidad de vida evaluada con el cuestionario “Ankylosing Spondylitis Quality of Life” (ASQoL).

Después de 6 semanas de tratamiento, los pacientes en el grupo de tratamiento no mostraron resultados más prometedores en la reducción del dolor, medido por VAS ( $P = 0.08$ ); evaluación funcional, según lo evaluado por BASFI ( $P = 0.19$ ) así como la calidad de vida, según lo evaluado por ASQoL ( $P = 0.18$ ), en comparación con los pacientes en el grupo control. No se produjeron eventos adversos en ambos grupos. Este estudio no tuvo resultados alentadores en pacientes con dolor crónico secundario a Espondiloartritis axial luego del tratamiento con TENS por 6 semanas.

Este estudio tiene varias limitaciones: primero, la dosis usada en este estudio puede ser insuficiente para el alivio del dolor crónico secundario a espondiloartritis, porque solo se utilizó TENS dos veces por semana durante un total de 6 semanas. En segundo lugar, el tamaño de muestra es bastante pequeño. En tercer lugar, por tratarse de un estudio retrospectivo, hay un alto riesgo de sesgos que pueden hacer que los resultados sean incomprensibles.

## Yoga

Se identificó solo un estudio “The Efficacy of Tai Chi and Yoga in Rheumatoid Arthritis and Spondyloarthropathies: A narrative biomedical review” (16). Esta revisión evaluó el Tai Chi y el Yoga en pacientes con Artritis reumatoidea y con Espondiloartropatías. Dentro de los estudios incluidos en esta revisión, ninguno evaluó el efecto del Yoga en las Espondiloartropatías.

## Reiki

La búsqueda de la literatura no arrojó ningún artículo relevante

## Valores y preferencia de pacientes

No se encontraron estudios que hayan evaluado valores y preferencias de pacientes sobre las terapias alternativas.

## Costos

No se identificaron estudios que hayan evaluado el consumo de recursos al aplicar estas terapias, tampoco análisis económicos que hayan evaluado comparativamente los costos y efectividad del uso de las diferentes terapias en el manejo de la EspAax.



## Marcos de trabajo –De la evidencia a las decisiones

Nota, se genera un marco de trabajo para cada una de las terapias evaluadas

| <i>PREGUNTA</i>        |                                                                              |
|------------------------|------------------------------------------------------------------------------|
| POBLACION              | Población de espondilitis Axial                                              |
| INTERVENCIÓN           | Acupuntura                                                                   |
| COMPARACIÓN            | Cuidado estándar/Placebo                                                     |
| DESENLACES PRINCIPALES | Efectividad- Respuesta terapéutica<br>Perfil de seguridad – Eventos Adversos |
| ÁMBITO                 | Ambulatorio                                                                  |
| PERSPECTIVA            | Del grupo desarrollador de la Guía                                           |
| CONFLICTO DE INTERÉS:  | No hay ninguna declaración de conflicto de interés                           |

## Evaluación

Problema

Es el problema una prioridad?

| JUICIO                                                                                                                                                                                                                                                                                                                                                                                                                                                                                                                                                                                                                                                                                                                                              | EVIDENCIA DE LA INVESTIGACION | CONSIDERACIONES ADICIONALES |
|-----------------------------------------------------------------------------------------------------------------------------------------------------------------------------------------------------------------------------------------------------------------------------------------------------------------------------------------------------------------------------------------------------------------------------------------------------------------------------------------------------------------------------------------------------------------------------------------------------------------------------------------------------------------------------------------------------------------------------------------------------|-------------------------------|-----------------------------|
| <div><div><div><div>No</div><div>Probablemente No</div><div>Probablemente Si</div><div>Si</div><div>Es variable</div><div>No se conoce</div></div></div></div> <div>La espondiloartritis axial es una enfermedad inflamatoria autoinmune de carácter crónico, que se caracteriza por dolor lumbar crónico, rigidez y pérdida progresiva de la movilidad. Si no se trata de forma adecuada la EspAax puede producir importante discapacidad, incluida la fusión del esqueleto axial y alteración en la calidad de vida.</div> <div>La acupuntura una técnica milenaria china parecería ser efectiva en pacientes con espondiloartritis Axial, sin embargo, la mayoría de los estudios carecen de fortaleza metodológica para ser concluyentes.</div> |                               |                             |

Efectos deseables (beneficios de la opción a recomendar)

¿Qué tan sustanciales son los efectos deseables de la opción?

| JUICIO                                                                                                                                                                                                                                                                                                                                                                                                                                                                                                       | EVIDENCIA DE LA INVESTIGACION              | CONSIDERACIONES ADICIONALES                |                                   |                          |                                                |                |      |                                   |  |
|--------------------------------------------------------------------------------------------------------------------------------------------------------------------------------------------------------------------------------------------------------------------------------------------------------------------------------------------------------------------------------------------------------------------------------------------------------------------------------------------------------------|--------------------------------------------|--------------------------------------------|-----------------------------------|--------------------------|------------------------------------------------|----------------|------|-----------------------------------|--|
| <div><div><div><div>Triviales</div><div>Pequeños</div><div>Moderados</div><div>Grandes</div><div>Varían</div><div>No se sabe</div></div></div></div> <div>Acupuntura vs DMARDs</div> <table><tr><th>Desenlaces</th><th>Nº de estudios (participantes) Seguimiento</th><th>Certeza de la evidencia (GRADE)</th><th>Efecto Relativo (95% CI)</th></tr><tr><td>Acupuntura sola vs DMARDs<br/>Respuesta clínica</td><td>3 ECAs (n=254)</td><td>Baja</td><td>Odds Ratio<br/>3.01 (1.48 to 6.13)</td></tr></table> | Desenlaces                                 | Nº de estudios (participantes) Seguimiento | Certeza de la evidencia (GRADE)   | Efecto Relativo (95% CI) | Acupuntura sola vs DMARDs<br>Respuesta clínica | 3 ECAs (n=254) | Baja | Odds Ratio<br>3.01 (1.48 to 6.13) |  |
| Desenlaces                                                                                                                                                                                                                                                                                                                                                                                                                                                                                                   | Nº de estudios (participantes) Seguimiento | Certeza de la evidencia (GRADE)            | Efecto Relativo (95% CI)          |                          |                                                |                |      |                                   |  |
| Acupuntura sola vs DMARDs<br>Respuesta clínica                                                                                                                                                                                                                                                                                                                                                                                                                                                               | 3 ECAs (n=254)                             | Baja                                       | Odds Ratio<br>3.01 (1.48 to 6.13) |                          |                                                |                |      |                                   |  |

|  |                                                                                     |                |      |                                                |
|--|-------------------------------------------------------------------------------------|----------------|------|------------------------------------------------|
|  | Acupuntura sola vs DMARDs<br><i>Velocidad de Sedimentación Globular (VSG)</i>       | 3 ECAs (n=254) | Baja | Std, mean Difference<br>-0,77 (-1.46 to -0,08) |
|  | Acupuntura más DMARDs vs DMARDs solos<br><i>Respuesta clínica</i>                   | 3 ECAs (n=240) | Baja | Odds Ratio<br>3.20 (1.36 to 7.54)              |
|  | Acupuntura más DMARDs vs DMARDs solos<br><i>Separación de la cabeza de la pared</i> | 3 ECAs (n=314) | Baja | Std, mean Difference<br>-0.84 (-1.37 to -0.31) |
|  | Acupuntura más DMARDs vs DMARDs solos<br><i>Distancia del dedo al piso</i>          | 3 ECAs (n=240) | Baja | Std, mean Difference<br>-0.48 (-0.87 to -0.09) |
|  | Acupuntura más DMARDs vs DMARDs solos<br><i>Expansión torácica</i>                  | 3 ECAs (n=314) | Baja | Std, mean Difference<br>0.38 (0.16 to 0.60)    |
|  | Acupuntura más DMARDs vs DMARDs solos<br><i>Proteína C Reactiva</i>                 | 3 ECAs (n=314) | Baja | mean Difference<br>-3.31 (-6.80 to 0.17)       |

| Efectos Indeseables                                                                                                                                               |                                                                                                                                                                                                                                                |                             |
|-------------------------------------------------------------------------------------------------------------------------------------------------------------------|------------------------------------------------------------------------------------------------------------------------------------------------------------------------------------------------------------------------------------------------|-----------------------------|
| ¿Qué tan sustanciales son los efectos indeseables que se pueden anticipar?                                                                                        |                                                                                                                                                                                                                                                |                             |
| JUICIO                                                                                                                                                            | EVIDENCIA DE LA INVESTIGACION                                                                                                                                                                                                                  | CONSIDERACIONES ADICIONALES |
| <ul style="list-style-type: none"> <li>○ Triviales</li> <li>○ Pequeños</li> <li>○ Moderados</li> <li>○ Grandes</li> <li>○ Varían</li> <li>● No se sabe</li> </ul> | Los estudios mencionan de manera tangencial algunos eventos adversos relacionados con los DMARDs. No hay claridad en cuanto a los eventos adversos relacionados con la acupuntura, sin embargo “parecerían” ser escasos y de poca importancia. |                             |

  

| Certeza en la Evidencia                                                                                                                                  |                                                                                                                                                                                                                                                                                                                                                                                                                                                                                |                                 |                      |                                 |                          |         |              |                                            |               |              |                                            |            |              |  |
|----------------------------------------------------------------------------------------------------------------------------------------------------------|--------------------------------------------------------------------------------------------------------------------------------------------------------------------------------------------------------------------------------------------------------------------------------------------------------------------------------------------------------------------------------------------------------------------------------------------------------------------------------|---------------------------------|----------------------|---------------------------------|--------------------------|---------|--------------|--------------------------------------------|---------------|--------------|--------------------------------------------|------------|--------------|--|
| ¿Cuál es la certeza en la evidencia global sobre los efectos de la opción a recomendar?                                                                  |                                                                                                                                                                                                                                                                                                                                                                                                                                                                                |                                 |                      |                                 |                          |         |              |                                            |               |              |                                            |            |              |  |
| JUICIO                                                                                                                                                   | EVIDENCIA DE LA INVESTIGACION                                                                                                                                                                                                                                                                                                                                                                                                                                                  | CONSIDERACIONES ADICIONALES     |                      |                                 |                          |         |              |                                            |               |              |                                            |            |              |  |
| <ul style="list-style-type: none"> <li>○ Muy baja</li> <li>● Baja</li> <li>○ Moderada</li> <li>○ Alta</li> <li>○ No se identificaron estudios</li> </ul> | <table border="1"> <thead> <tr> <th>Desenlace</th> <th>Importancia Relativa</th> <th>Certeza de la evidencia (GRADE)</th> </tr> </thead> <tbody> <tr> <td><i>Respuesta clínica</i></td> <td>Critico</td> <td>⊕⊕○○<br/>Baja</td> </tr> <tr> <td><i>Velocidad de Sedimentación Globular</i></td> <td>No importante</td> <td>⊕⊕○○<br/>Baja</td> </tr> <tr> <td><i>Separación de la cabeza de la pared</i></td> <td>Importante</td> <td>⊕⊕○○<br/>Baja</td> </tr> </tbody> </table> | Desenlace                       | Importancia Relativa | Certeza de la evidencia (GRADE) | <i>Respuesta clínica</i> | Critico | ⊕⊕○○<br>Baja | <i>Velocidad de Sedimentación Globular</i> | No importante | ⊕⊕○○<br>Baja | <i>Separación de la cabeza de la pared</i> | Importante | ⊕⊕○○<br>Baja |  |
| Desenlace                                                                                                                                                | Importancia Relativa                                                                                                                                                                                                                                                                                                                                                                                                                                                           | Certeza de la evidencia (GRADE) |                      |                                 |                          |         |              |                                            |               |              |                                            |            |              |  |
| <i>Respuesta clínica</i>                                                                                                                                 | Critico                                                                                                                                                                                                                                                                                                                                                                                                                                                                        | ⊕⊕○○<br>Baja                    |                      |                                 |                          |         |              |                                            |               |              |                                            |            |              |  |
| <i>Velocidad de Sedimentación Globular</i>                                                                                                               | No importante                                                                                                                                                                                                                                                                                                                                                                                                                                                                  | ⊕⊕○○<br>Baja                    |                      |                                 |                          |         |              |                                            |               |              |                                            |            |              |  |
| <i>Separación de la cabeza de la pared</i>                                                                                                               | Importante                                                                                                                                                                                                                                                                                                                                                                                                                                                                     | ⊕⊕○○<br>Baja                    |                      |                                 |                          |         |              |                                            |               |              |                                            |            |              |  |

|                                                                                                                                                                                                                                                                                                                         |                                                                                                                                                                                                                                                                                                           |                                    |            |              |                           |            |              |                            |               |              |  |
|-------------------------------------------------------------------------------------------------------------------------------------------------------------------------------------------------------------------------------------------------------------------------------------------------------------------------|-----------------------------------------------------------------------------------------------------------------------------------------------------------------------------------------------------------------------------------------------------------------------------------------------------------|------------------------------------|------------|--------------|---------------------------|------------|--------------|----------------------------|---------------|--------------|--|
|                                                                                                                                                                                                                                                                                                                         | <table border="1"> <tr> <td><i>Distancia del dedo al piso</i></td><td>Importante</td><td>⊕⊕○○<br/>Baja</td></tr> <tr> <td><i>Expansión torácica</i></td><td>Importante</td><td>⊕⊕○○<br/>Baja</td></tr> <tr> <td><i>Proteína C Reactiva</i></td><td>No importante</td><td>⊕⊕○○<br/>Baja</td></tr> </table> | <i>Distancia del dedo al piso</i>  | Importante | ⊕⊕○○<br>Baja | <i>Expansión torácica</i> | Importante | ⊕⊕○○<br>Baja | <i>Proteína C Reactiva</i> | No importante | ⊕⊕○○<br>Baja |  |
| <i>Distancia del dedo al piso</i>                                                                                                                                                                                                                                                                                       | Importante                                                                                                                                                                                                                                                                                                | ⊕⊕○○<br>Baja                       |            |              |                           |            |              |                            |               |              |  |
| <i>Expansión torácica</i>                                                                                                                                                                                                                                                                                               | Importante                                                                                                                                                                                                                                                                                                | ⊕⊕○○<br>Baja                       |            |              |                           |            |              |                            |               |              |  |
| <i>Proteína C Reactiva</i>                                                                                                                                                                                                                                                                                              | No importante                                                                                                                                                                                                                                                                                             | ⊕⊕○○<br>Baja                       |            |              |                           |            |              |                            |               |              |  |
| <b>Valores de los pacientes</b><br>¿Hay variación o poca certeza sobre cómo valoran las personas/los pacientes los desenlaces principales?                                                                                                                                                                              |                                                                                                                                                                                                                                                                                                           |                                    |            |              |                           |            |              |                            |               |              |  |
| <b>JUICIO</b>                                                                                                                                                                                                                                                                                                           | <b>EVIDENCIA DE LA INVESTIGACION</b>                                                                                                                                                                                                                                                                      | <b>CONSIDERACIONES ADICIONALES</b> |            |              |                           |            |              |                            |               |              |  |
| <input type="radio"/> Variabilidad o incertidumbre importante<br><input checked="" type="radio"/> Posiblemente hay variabilidad o incertidumbre importante<br><input type="radio"/> Posiblemente No hay variabilidad o incertidumbre importante<br><input type="radio"/> No hay variabilidad o incertidumbre importante | No hay información                                                                                                                                                                                                                                                                                        |                                    |            |              |                           |            |              |                            |               |              |  |
| <b>Balance de los efectos</b><br>¿El balance entre los efectos deseables e indeseables favorece la opción o el comparador?                                                                                                                                                                                              |                                                                                                                                                                                                                                                                                                           |                                    |            |              |                           |            |              |                            |               |              |  |
| <b>JUICIO</b>                                                                                                                                                                                                                                                                                                           | <b>EVIDENCIA DE LA INVESTIGACION</b>                                                                                                                                                                                                                                                                      | <b>CONSIDERACIONES ADICIONALES</b> |            |              |                           |            |              |                            |               |              |  |
| <input type="radio"/> Favorece al comparador<br><input type="radio"/> Probablemente favorece al comparador<br><input type="radio"/> No favorece al comparador ni a                                                                                                                                                      | El balance parece favorecer el uso de la Acupuntura de acuerdo al estudio "Acupuncture Therapy versus Disease-modifying Antirheumatic Drugs for the Treatment of Ankylosing Spondylitis--a Meta-analysis",                                                                                                |                                    |            |              |                           |            |              |                            |               |              |  |

|                                                                                                                                                                                                                                                                                                               |                                                                                                                                                                                                                                                                                                                                                                    |                                    |
|---------------------------------------------------------------------------------------------------------------------------------------------------------------------------------------------------------------------------------------------------------------------------------------------------------------|--------------------------------------------------------------------------------------------------------------------------------------------------------------------------------------------------------------------------------------------------------------------------------------------------------------------------------------------------------------------|------------------------------------|
| la opción en evaluación<br><input type="radio"/> Probablemente favorece a la intervención<br><input type="radio"/> Favorece a la intervención<br><input type="radio"/> Varía<br><input checked="" type="radio"/> No se sabe                                                                                   | sin embargo, la falta de rigor metodológico de los estudios incluidos no permite concluir con certeza. El estudio "Efficacy of acupuncture in rheumatic diseases with spine involvement: Systematic Review" muestra que los resultados no son concluyentes para Espondiloartritis axial y que faltan estudios bien diseñados con evaluación a medio y largo plazo. |                                    |
| <b>Recursos requeridos y costos</b><br>Que tanto es el requerimiento de recursos (costos)?                                                                                                                                                                                                                    |                                                                                                                                                                                                                                                                                                                                                                    |                                    |
| <b>JUICIO</b>                                                                                                                                                                                                                                                                                                 | <b>EVIDENCIA DE LA INVESTIGACION</b>                                                                                                                                                                                                                                                                                                                               | <b>CONSIDERACIONES ADICIONALES</b> |
| <input type="radio"/> Grandes costos<br><input type="radio"/> Costos moderados<br><input type="radio"/> no significantes costos ni ahorros<br><input type="radio"/> Moderados ahorros<br><input type="radio"/> Grandes ahorros<br><input type="radio"/> Varían<br><input checked="" type="radio"/> No se sabe | No hay información al respecto                                                                                                                                                                                                                                                                                                                                     |                                    |
| <b>Equidad</b><br>¿La implementación de la opción, tendrá impacto en la equidad?                                                                                                                                                                                                                              |                                                                                                                                                                                                                                                                                                                                                                    |                                    |
| <b>JUICIO</b>                                                                                                                                                                                                                                                                                                 | <b>EVIDENCIA DE LA INVESTIGACION</b>                                                                                                                                                                                                                                                                                                                               | <b>CONSIDERACIONES ADICIONALES</b> |
| <input type="radio"/> Reduce<br><input type="radio"/> Probablemente se reduce la equidad<br><input type="radio"/> Probablemente no impacta la equidad<br><input type="radio"/> Probablemente incrementa<br><input type="radio"/> Incrementa                                                                   | No hay información al respecto                                                                                                                                                                                                                                                                                                                                     |                                    |

|                                                                                                                                                                                                                        |                                                                                                                      |                                    |
|------------------------------------------------------------------------------------------------------------------------------------------------------------------------------------------------------------------------|----------------------------------------------------------------------------------------------------------------------|------------------------------------|
| <input type="radio"/> Varia<br><input checked="" type="radio"/> No se sabe                                                                                                                                             |                                                                                                                      |                                    |
| <b>Aceptabilidad</b><br>¿Es la opción aceptada por los diferentes actores involucrados en su implementación?                                                                                                           |                                                                                                                      |                                    |
| <b>JUICIO</b>                                                                                                                                                                                                          | <b>EVIDENCIA DE LA INVESTIGACION</b>                                                                                 | <b>CONSIDERACIONES ADICIONALES</b> |
| <input type="radio"/> No<br><input type="radio"/> Probablemente no<br><input type="radio"/> Probablemente si<br><input type="radio"/> Si<br><input type="radio"/> Varia<br><input checked="" type="radio"/> No se sabe | No hay información al respecto                                                                                       |                                    |
| <b>Factibilidad</b><br>¿Es la opción factible de IMPLEMENTAR?                                                                                                                                                          |                                                                                                                      |                                    |
| <b>JUICIO</b>                                                                                                                                                                                                          | <b>EVIDENCIA DE LA INVESTIGACION</b>                                                                                 | <b>CONSIDERACIONES ADICIONALES</b> |
| No<br><input type="radio"/> Probablemente no<br><input type="radio"/> Probablemente si<br><input type="radio"/> Si<br><input type="radio"/> Varia<br><input checked="" type="radio"/> No se sabe                       | No se encontraron estudios de factibilidad de implementación en espondiloartritis Axial con relación a la Acupuntura |                                    |

## Resumen de Juicios

|                         | JUICIOS                                 |                                                      |                                                              |                                            |                            |       |                     |
|-------------------------|-----------------------------------------|------------------------------------------------------|--------------------------------------------------------------|--------------------------------------------|----------------------------|-------|---------------------|
| PROBLEMA                | No                                      | Probablemente no                                     | Probablemente si                                             | Si                                         |                            | Varia | No se sabe          |
| EFFECTOS DESEABLES      | Trivial                                 | Pequeño                                              | Moderado                                                     | Grande                                     |                            | Varia | No se sabe          |
| EFFECTOS INDESEABLES    | Grande                                  | Moderado                                             | Pequeño                                                      | Trivial                                    |                            | Varia | No se sabe          |
| CERTEZA EN LA EVIDENCIA | Muy Bajo                                | Bajo                                                 | Moderado                                                     | Alto                                       |                            |       | No incluyó estudios |
| VALORES DE PACIENTES    | Importante incertidumbre o variabilidad | Posiblemente importante incertidumbre o variabilidad | Probablemente no hay importante incertidumbre o variabilidad | No importante incertidumbre o variabilidad |                            |       |                     |
| BALANCE DE LOS EFECTOS  | Favorece al comparador                  | Probablemente Favorece al comparador                 | No favorece ni a la intervención ni al comparador            | Probablemente favorece a la intervención   | Favorece a la intervención | Varia | No se sabe          |
| RECURSOS REQUERIDOS     | Grandes costos                          | Moderados costos                                     | Costos y ahorros insignificantes                             | Moderados ahorros                          | Grandes ahorros            | Varia | No se sabe          |
| EQUIDAD                 | Reducida                                | Probablemente reducida                               | Probablemente no impactada                                   | Probablemente incrementada                 | Incrementada               | Varia | No se sabe          |
| ACEPTABILIDAD           | No                                      | Probablemente no                                     | Probablemente si                                             | Si                                         |                            | Varia | No se sabe          |
| FACTIBILIDAD            | No                                      | Probablemente no                                     | Probablemente si                                             | Si                                         |                            | Varia | No se sabe          |



## Tipo de Recomendación

|                                             |                                                  |                                                                           |                                                |                                           |
|---------------------------------------------|--------------------------------------------------|---------------------------------------------------------------------------|------------------------------------------------|-------------------------------------------|
| Recomendación fuerte en contra de la opción | Recomendación condicional en contra de la opción | Recomendación condicional a favor de cualquiera la opción o su comparador | Recomendación condicional a favor de la opción | Recomendación fuerte a favor de la opción |
| ○                                           | ○                                                | ○                                                                         | ○                                              | ○                                         |

## Conclusiones

### Recomendación

En pacientes con EspAax se recomienda no usar terapias no convencionales como única opción de tratamiento Recomendación condicional en contra de la intervención. Certeza de la evidencia baja.

### Justificación

Patología inflamatoria crónica con gran carga de enfermedad entre otros factores dado por dolor e inflamación, por lo cual terapias complementarias en general con pocas contraindicaciones y efectos secundarios podrían ser parte del arsenal terapéutico multidisciplinario, pertinente en estas enfermedades

### Consideraciones por subgrupos

No se identifican como necesarias.

### Consideraciones de implementación

Compromiso del personal de salud, pacientes y familias, en la realización, evaluación y cumplimiento de los programas y terapias.

Entrenamiento del personal que realiza estas terapias.

Canales de retroalimentación y comunicación, entre el grupo tratante y los diferentes integrantes del equipo terapéutico.

Evaluación periódica en cuanto a escalas de dolor, función y calidad de vida de los pacientes.

Evaluación periódica del sustento teórico de este tipo de terapias para ajustes según nuevos estudios.

### Monitoreo y evaluación de cumplimiento

Escalas de actividad, dolor, BASFI, BASMI y calidad de vida.

Monitorización de cumplimiento a través de retroalimentación del paciente, historias clínicas, notas de evolución.

### Prioridades de investigación futura

Se hace necesario el diseño de protocolos de investigación estandarizados y con rigor metodológico que permitan en un futuro tener evidencia a favor o en contra de la Acupuntura para el tratamiento de pacientes con Espondiloartritis Axial

## Marco EtD-2

| PREGUNTA               |                                                                                            |
|------------------------|--------------------------------------------------------------------------------------------|
| POBLACION              | <i>Población de espondilitis Axial</i>                                                     |
| INTERVENCIÓN           | <i>Práctica de Pilates</i>                                                                 |
| COMPARACIÓN            | <i>Cuidado estándar</i>                                                                    |
| DESENLACES PRINCIPALES | <i>Efectividad- Respuesta terapéutica</i><br><i>Perfil de seguridad – Eventos Adversos</i> |
| ÁMBITO                 | <i>Ambulatorio</i>                                                                         |
| PERSPECTIVA            |                                                                                            |
| CONFLICTO DE INTERÉS:  | <i>No hay ninguna declaración de conflicto de interés</i>                                  |

## Evaluación

| Problema                                                                                                                                                             |                                                                                                                                                                                                                                                                                                                                                                                                                                                                                                                                                                                                                                                                                                                                                                                                                                                                                                                                                                                                 |                                 |                                                                                         |                             |                                               |                                 |                                                                                         |       |              |      |                     |  |
|----------------------------------------------------------------------------------------------------------------------------------------------------------------------|-------------------------------------------------------------------------------------------------------------------------------------------------------------------------------------------------------------------------------------------------------------------------------------------------------------------------------------------------------------------------------------------------------------------------------------------------------------------------------------------------------------------------------------------------------------------------------------------------------------------------------------------------------------------------------------------------------------------------------------------------------------------------------------------------------------------------------------------------------------------------------------------------------------------------------------------------------------------------------------------------|---------------------------------|-----------------------------------------------------------------------------------------|-----------------------------|-----------------------------------------------|---------------------------------|-----------------------------------------------------------------------------------------|-------|--------------|------|---------------------|--|
| Es el problema una prioridad?                                                                                                                                        |                                                                                                                                                                                                                                                                                                                                                                                                                                                                                                                                                                                                                                                                                                                                                                                                                                                                                                                                                                                                 |                                 |                                                                                         |                             |                                               |                                 |                                                                                         |       |              |      |                     |  |
| JUICIO                                                                                                                                                               | EVIDENCIA DE LA INVESTIGACION                                                                                                                                                                                                                                                                                                                                                                                                                                                                                                                                                                                                                                                                                                                                                                                                                                                                                                                                                                   |                                 |                                                                                         | CONSIDERACIONES ADICIONALES |                                               |                                 |                                                                                         |       |              |      |                     |  |
| <ul style="list-style-type: none"><li>◦ No</li><li>◦ Probablemente No</li><li>◦ Probablemente Si</li><li>◦ Si</li><li>◦ Es variable</li><li>◦ No se conoce</li></ul> | La espondiloartritis axial es una enfermedad inflamatoria autoinmune de carácter crónico, que se caracteriza por dolor lumbar crónico, rigidez y pérdida progresiva de la movilidad. Si no se trata de forma adecuada la EspAax puede producir importante discapacidad, incluida la fusión del esqueleto axial y alteración en la calidad de vida. Los Pilates son un sistema de ejercicio centrado en movimientos controlados, estiramientos y respiración. La práctica de Pilates es popular hoy en día no solo por la forma física sino también para programas de rehabilitación. El entrenamiento en Pilates parecería ser efectivo en pacientes con espondilo artritis Axial, sin embargo, la mayoría de los estudios carecen de fortaleza metodológica y son muy heterogéneos para ser concluyentes e incluyeron un muy pequeño número de pacientes. Las revisiones sistemáticas revisadas no se enfocan solo el tratamiento con Pilates. Incluyen otros métodos de entrenamiento físico. |                                 |                                                                                         |                             |                                               |                                 |                                                                                         |       |              |      |                     |  |
| Efectos deseables (beneficios de la opción a recomendar)                                                                                                             |                                                                                                                                                                                                                                                                                                                                                                                                                                                                                                                                                                                                                                                                                                                                                                                                                                                                                                                                                                                                 |                                 |                                                                                         |                             |                                               |                                 |                                                                                         |       |              |      |                     |  |
| ¿Qué tan sustanciales son los efectos deseables de la opción?                                                                                                        |                                                                                                                                                                                                                                                                                                                                                                                                                                                                                                                                                                                                                                                                                                                                                                                                                                                                                                                                                                                                 |                                 |                                                                                         |                             |                                               |                                 |                                                                                         |       |              |      |                     |  |
| JUICIO                                                                                                                                                               | EVIDENCIA DE LA INVESTIGACION                                                                                                                                                                                                                                                                                                                                                                                                                                                                                                                                                                                                                                                                                                                                                                                                                                                                                                                                                                   |                                 |                                                                                         | CONSIDERACIONES ADICIONALES |                                               |                                 |                                                                                         |       |              |      |                     |  |
| <ul style="list-style-type: none"><li>◦ Triviales</li><li>◦ Pequeños</li><li>◦ Moderados</li><li>◦ Grandes</li><li>◦ Varían</li><li>◦ No se sabe</li></ul>           | Efecto del entrenamiento en Pilates en pacientes con Espondiloartritis axial <table><tr><td>Desenlaces</td><td>Nº de estudios (participantes)<br/>Seguimiento</td><td>Certeza de la evidencia (GRADE)</td><td>Efecto Relativo<br/>Valor promedio (SD).<br/>Cambio del puntaje entre la semana 0 y la 24</td></tr><tr><td>BASFI</td><td>1 ECA (n=55)</td><td>Baja</td><td>Pilates: -0.7 (1.2)</td></tr></table>                                                                                                                                                                                                                                                                                                                                                                                                                                                                                                                                                                                  |                                 |                                                                                         | Desenlaces                  | Nº de estudios (participantes)<br>Seguimiento | Certeza de la evidencia (GRADE) | Efecto Relativo<br>Valor promedio (SD).<br>Cambio del puntaje entre la semana 0 y la 24 | BASFI | 1 ECA (n=55) | Baja | Pilates: -0.7 (1.2) |  |
| Desenlaces                                                                                                                                                           | Nº de estudios (participantes)<br>Seguimiento                                                                                                                                                                                                                                                                                                                                                                                                                                                                                                                                                                                                                                                                                                                                                                                                                                                                                                                                                   | Certeza de la evidencia (GRADE) | Efecto Relativo<br>Valor promedio (SD).<br>Cambio del puntaje entre la semana 0 y la 24 |                             |                                               |                                 |                                                                                         |       |              |      |                     |  |
| BASFI                                                                                                                                                                | 1 ECA (n=55)                                                                                                                                                                                                                                                                                                                                                                                                                                                                                                                                                                                                                                                                                                                                                                                                                                                                                                                                                                                    | Baja                            | Pilates: -0.7 (1.2)                                                                     |                             |                                               |                                 |                                                                                         |       |              |      |                     |  |

|                     |                                                                    |              |      |                                                              |  |
|---------------------|--------------------------------------------------------------------|--------------|------|--------------------------------------------------------------|--|
|                     | <i>(Bath Ankylosing Spondylitis Functional Index)</i>              |              |      | Control: 0.1 (1.1)<br>p=0.023                                |  |
|                     | <i>BASDAI (Bath Ankylosing Spondylitis Disease Activity Index)</i> | 1 ECA (n=55) | Baja | Pilates: -0.4 (2.1)<br>Control: 0.4 (0.9)<br>p=0.106         |  |
|                     | <i>BASMI (Bath Ankylosing Spondylitis Metrology Index)</i>         | 1 ECA (n=55) | Baja | Pilates: -0.4 (0.8)<br>Control: 0.2 (1.1)<br>p=0.013         |  |
|                     | <i>Chest expansion (cm)</i>                                        | 1 ECA (n=55) | Baja | Pilates: 0.2 (0.4)<br><br>Control: 0.1 (0.5) p=0.121         |  |
|                     | <i>ASQoL (Ankylosing spondylitis quality of life)</i>              | 1 ECA (n=55) | Baja | Pilates: 0.1 (3.4)<br><br>Control: -0.4 (1.7)<br><br>P=0.808 |  |
| Efectos Indeseables |                                                                    |              |      |                                                              |  |

| ¿Qué tan sustanciales son los efectos indeseables que se pueden anticipar?                                                                                        |                                                                                                                                                                                                                                                                                                                                                                                                                                                                                                                                                  |                                 |                      |                                 |                                                                        |         |              |                                                                              |            |                  |                                                                      |            |                  |  |
|-------------------------------------------------------------------------------------------------------------------------------------------------------------------|--------------------------------------------------------------------------------------------------------------------------------------------------------------------------------------------------------------------------------------------------------------------------------------------------------------------------------------------------------------------------------------------------------------------------------------------------------------------------------------------------------------------------------------------------|---------------------------------|----------------------|---------------------------------|------------------------------------------------------------------------|---------|--------------|------------------------------------------------------------------------------|------------|------------------|----------------------------------------------------------------------|------------|------------------|--|
| JUICIO                                                                                                                                                            | EVIDENCIA DE LA INVESTIGACION                                                                                                                                                                                                                                                                                                                                                                                                                                                                                                                    | CONSIDERACIONES ADICIONALES     |                      |                                 |                                                                        |         |              |                                                                              |            |                  |                                                                      |            |                  |  |
| <ul style="list-style-type: none"> <li>○ Triviales</li> <li>○ Pequeños</li> <li>○ Moderados</li> <li>○ Grandes</li> <li>○ Varían</li> <li>○ No se sabe</li> </ul> | No hay información                                                                                                                                                                                                                                                                                                                                                                                                                                                                                                                               |                                 |                      |                                 |                                                                        |         |              |                                                                              |            |                  |                                                                      |            |                  |  |
| Certeza en la Evidencia<br>¿Cuál es la certeza en la evidencia global sobre los efectos de la opción a recomendar?                                                |                                                                                                                                                                                                                                                                                                                                                                                                                                                                                                                                                  |                                 |                      |                                 |                                                                        |         |              |                                                                              |            |                  |                                                                      |            |                  |  |
| JUICIO                                                                                                                                                            | EVIDENCIA DE LA INVESTIGACION                                                                                                                                                                                                                                                                                                                                                                                                                                                                                                                    | CONSIDERACIONES ADICIONALES     |                      |                                 |                                                                        |         |              |                                                                              |            |                  |                                                                      |            |                  |  |
| <ul style="list-style-type: none"> <li>○ Muy baja</li> <li>○ Baja</li> <li>○ Moderada</li> <li>○ Alta</li> <li>○ No se identificaron estudios</li> </ul>          | <table> <tr> <th>Desenlace</th><th>Importancia Relativa</th><th>Certeza de la evidencia (GRADE)</th></tr> <tr> <td> <i>BASFI</i><br/> <i>(Bath Ankylosing Spondylitis Functional Index).</i> </td><td>Crítico</td><td>⊕⊕○○<br/>Baja</td></tr> <tr> <td> <i>BASDAI</i><br/> <i>(Bath Ankylosing Spondylitis Disease Activity Index)</i> </td><td>Importante</td><td>⊕○○○<br/>Muy baja</td></tr> <tr> <td> <i>BASMI</i><br/> <i>(Bath Ankylosing Spondylitis Metrology Index)</i> </td><td>Importante</td><td>⊕○○○<br/>Muy Baja</td></tr> </table> | Desenlace                       | Importancia Relativa | Certeza de la evidencia (GRADE) | <i>BASFI</i><br><i>(Bath Ankylosing Spondylitis Functional Index).</i> | Crítico | ⊕⊕○○<br>Baja | <i>BASDAI</i><br><i>(Bath Ankylosing Spondylitis Disease Activity Index)</i> | Importante | ⊕○○○<br>Muy baja | <i>BASMI</i><br><i>(Bath Ankylosing Spondylitis Metrology Index)</i> | Importante | ⊕○○○<br>Muy Baja |  |
| Desenlace                                                                                                                                                         | Importancia Relativa                                                                                                                                                                                                                                                                                                                                                                                                                                                                                                                             | Certeza de la evidencia (GRADE) |                      |                                 |                                                                        |         |              |                                                                              |            |                  |                                                                      |            |                  |  |
| <i>BASFI</i><br><i>(Bath Ankylosing Spondylitis Functional Index).</i>                                                                                            | Crítico                                                                                                                                                                                                                                                                                                                                                                                                                                                                                                                                          | ⊕⊕○○<br>Baja                    |                      |                                 |                                                                        |         |              |                                                                              |            |                  |                                                                      |            |                  |  |
| <i>BASDAI</i><br><i>(Bath Ankylosing Spondylitis Disease Activity Index)</i>                                                                                      | Importante                                                                                                                                                                                                                                                                                                                                                                                                                                                                                                                                       | ⊕○○○<br>Muy baja                |                      |                                 |                                                                        |         |              |                                                                              |            |                  |                                                                      |            |                  |  |
| <i>BASMI</i><br><i>(Bath Ankylosing Spondylitis Metrology Index)</i>                                                                                              | Importante                                                                                                                                                                                                                                                                                                                                                                                                                                                                                                                                       | ⊕○○○<br>Muy Baja                |                      |                                 |                                                                        |         |              |                                                                              |            |                  |                                                                      |            |                  |  |

|  |                                                   |            |                  |  |
|--|---------------------------------------------------|------------|------------------|--|
|  | Expansión torácica (cm)                           | Baja       | ⊕○○○<br>Muy Baja |  |
|  | ASQoL<br>(Ankylosing spondylitis quality of life) | Importante | ⊕○○○<br>Muy Baja |  |
|  |                                                   |            |                  |  |

|                                                                                                                                                                                                                                                                 |                               |  |                             |
|-----------------------------------------------------------------------------------------------------------------------------------------------------------------------------------------------------------------------------------------------------------------|-------------------------------|--|-----------------------------|
| Valores de los pacientes                                                                                                                                                                                                                                        |                               |  |                             |
| ¿Hay variación o poca certeza sobre cómo valoran las personas/los pacientes los desenlaces principales?                                                                                                                                                         |                               |  |                             |
| JUICIO                                                                                                                                                                                                                                                          | EVIDENCIA DE LA INVESTIGACION |  | CONSIDERACIONES ADICIONALES |
| <div>○ Variabilidad o incertidumbre importante</div> <div>○ Posiblemente hay variabilidad o incertidumbre importante</div> <div>○ Posiblemente No hay variabilidad o incertidumbre importante</div> <div>○ No hay variabilidad o incertidumbre importante</div> | No hay información            |  |                             |

| Balance de los efectos                                                                                                                                                                                                                                                                                                                                                                       |                                                                                                                                                            |                             |
|----------------------------------------------------------------------------------------------------------------------------------------------------------------------------------------------------------------------------------------------------------------------------------------------------------------------------------------------------------------------------------------------|------------------------------------------------------------------------------------------------------------------------------------------------------------|-----------------------------|
| ¿El balance entre los efectos deseables e indeseables favorece la opción o el comparador?                                                                                                                                                                                                                                                                                                    |                                                                                                                                                            |                             |
| JUICIO                                                                                                                                                                                                                                                                                                                                                                                       | EVIDENCIA DE LA INVESTIGACION                                                                                                                              | CONSIDERACIONES ADICIONALES |
| <input type="radio"/> Favorece al comparador<br><input type="radio"/> Probablemente favorece al comparador<br><input type="radio"/> No favorece al comparador ni a la opción en evaluación<br><input checked="" type="radio"/> Probablemente favorece a la intervención<br><input type="radio"/> Favorece la intervención<br><input type="radio"/> Varía<br><input type="radio"/> No se sabe | El balance parece favorecer el uso de la terapia con Pilates a las 24 semanas, sin embargo, se trata de un estudio muy pequeño y con fallas metodológicas. |                             |
| Recursos requeridos                                                                                                                                                                                                                                                                                                                                                                          |                                                                                                                                                            |                             |
| Que tanto es el requerimiento de recursos (costos)?                                                                                                                                                                                                                                                                                                                                          |                                                                                                                                                            |                             |
| JUICIO                                                                                                                                                                                                                                                                                                                                                                                       | EVIDENCIA DE LA INVESTIGACION                                                                                                                              | CONSIDERACIONES ADICIONALES |
| <input type="radio"/> Grandes costos<br><input type="radio"/> Costos moderados<br><input type="radio"/> no significantes costos ni ahorros<br><input type="radio"/> Moderados ahorros<br><input type="radio"/> Grandes ahorros<br><input type="radio"/> Varían<br><input checked="" type="radio"/> No se sabe                                                                                | No hay información al respecto                                                                                                                             |                             |
| Equidad                                                                                                                                                                                                                                                                                                                                                                                      |                                                                                                                                                            |                             |
| ¿La implementación de la opción, tendrá impacto en la equidad?                                                                                                                                                                                                                                                                                                                               |                                                                                                                                                            |                             |



| JUICIO                                                                                                                                                                                                                                                   | EVIDENCIA DE LA INVESTIGACION                                                                                  | CONSIDERACIONES ADICIONALES |
|----------------------------------------------------------------------------------------------------------------------------------------------------------------------------------------------------------------------------------------------------------|----------------------------------------------------------------------------------------------------------------|-----------------------------|
| <ul style="list-style-type: none"> <li>○ Reduce</li> <li>○ Probablemente se reduce la equidad</li> <li>○ Probablemente no impacta la equidad</li> <li>○ Probablemente incrementa</li> <li>○ Incrementa</li> <li>○ Varía</li> <li>○ No se sabe</li> </ul> | No hay información al respecto                                                                                 |                             |
| <b>Aceptabilidad</b><br>¿Es la opción aceptada por los diferentes actores involucrados en su implementación?                                                                                                                                             |                                                                                                                |                             |
| JUICIO                                                                                                                                                                                                                                                   | EVIDENCIA DE LA INVESTIGACION                                                                                  | CONSIDERACIONES ADICIONALES |
| <ul style="list-style-type: none"> <li>○ No</li> <li>○ Probablemente no</li> <li>○ Probablemente si</li> <li>○ Si</li> <li>○ Varía</li> <li>○ No se sabe</li> </ul>                                                                                      | No hay información al respecto                                                                                 |                             |
| <b>Factibilidad</b><br>¿Es la opción factible de IMPLEMENTAR?                                                                                                                                                                                            |                                                                                                                |                             |
| JUICIO                                                                                                                                                                                                                                                   | EVIDENCIA DE LA INVESTIGACION                                                                                  | CONSIDERACIONES ADICIONALES |
| <ul style="list-style-type: none"> <li>No</li> <li>○ Probablemente no</li> <li>○ Probablemente si</li> <li>○ Si</li> <li>○ Varía</li> <li>○ No se sabe</li> </ul>                                                                                        | No se encontraron estudios de factibilidad de implementación en espondiloartritis Axial con relación a Pilates |                             |

## Resumen de Juicios

|                         | JUICIOS                                 |                                                      |                                                              |                                            |                            |       |                     |
|-------------------------|-----------------------------------------|------------------------------------------------------|--------------------------------------------------------------|--------------------------------------------|----------------------------|-------|---------------------|
| PROBLEMA                | No                                      | Probablemente no                                     | Probablemente si                                             | Si                                         |                            | Varia | No se sabe          |
| EFFECTOS DESEABLES      | Trivial                                 | Pequeño                                              | Moderado                                                     | Grande                                     |                            | Varia | No se sabe          |
| EFFECTOS INDESEABLES    | Grande                                  | Moderado                                             | Pequeño                                                      | Trivial                                    |                            | Varia | No se sabe          |
| CERTEZA EN LA EVIDENCIA | Muy Bajo                                | Bajo                                                 | Moderado                                                     | Alto                                       |                            |       | No incluyó estudios |
| VALORES DE PACIENTES    | Importante incertidumbre o variabilidad | Posiblemente importante incertidumbre o variabilidad | Probablemente no hay importante incertidumbre o variabilidad | No importante incertidumbre o variabilidad |                            |       |                     |
| BALANCE DE LOS EFECTOS  | Favorece al comparador                  | Probablemente Favorece al comparador                 | No favorece ni a la intervención ni al comparador            | Probablemente favorece a la intervención   | Favorece a la intervención | Varia | No se sabe          |
| RECURSOS REQUERIDOS     | Grandes costos                          | Moderados costos                                     | Costos y ahorros insignificantes                             | Moderados ahorros                          | Grandes ahorros            | Varia | No se sabe          |
| EQUIDAD                 | Reducida                                | Probablemente reducida                               | Probablemente no impactada                                   | Probablemente incrementada                 | Incrementada               | Varia | No se sabe          |
| ACEPTABILIDAD           | No                                      | Probablemente no                                     | Probablemente si                                             | Si                                         |                            | Varia | No se sabe          |
| FACTIBILIDAD            | No                                      | Probablemente no                                     | Probablemente si                                             | Si                                         |                            | Varia | No se sabe          |

## Tipo de Recomendación

|                                             |                                                  |                                                                            |                                                |                                           |
|---------------------------------------------|--------------------------------------------------|----------------------------------------------------------------------------|------------------------------------------------|-------------------------------------------|
| Recomendación fuerte en contra de la opción | Recomendación condicional en contra de la opción | Recomendación condicional a favor de cualquiera, la opción o su comparador | Recomendación condicional a favor de la opción | Recomendación fuerte a favor de la opción |
| ○                                           | ○                                                | ○                                                                          | ○                                              | ○                                         |

## Conclusiones

### Recomendación

En pacientes con EspAax se sugiere no usar terapias no convencionales como única opción de tratamiento Recomendación condicional en contra. Certeza de la evidencia baja.

### Justificación

Patología inflamatoria crónica con gran carga de enfermedad entre otros factores dado por dolor e inflamación, por lo cual terapias complementarias en general con pocas contraindicaciones y efectos secundarios podrían ser parte del arsenal terapéutico multidisciplinario, pertinente en estas enfermedades.

### Consideraciones por subgrupos

No se identifican como necesarias.

### Consideraciones de implementación

Compromiso del personal de salud, pacientes y familias, en la realización, evaluación y cumplimiento de los programas y terapias.

Entrenamiento del personal que realiza estas terapias.

Canales de retroalimentación y comunicación, entre el grupo tratante y los diferentes integrantes del equipo terapéutico.

Evaluación periódica en cuanto a escalas de dolor, función y calidad de vida de los pacientes.

Evaluación periódica del sustento teórico de este tipo de terapias para ajustes según nuevos estudios.

### Monitoreo y evaluación de cumplimiento

Escalas de actividad, dolor, BASFI, BASMI y calidad de vida.

Monitorización de cumplimiento a través de retroalimentación del paciente, historias clínicas, notas de evolución.

### Prioridades de investigación futura

Se hace necesario el diseño de protocolos de investigación estandarizados, con rigor metodológico y un número de pacientes suficiente que permitan en un futuro tener evidencia a favor o en contra de la práctica de Pilates para el tratamiento de pacientes con Espondiloartritis Axial

## Marco EtD 3

| PREGUNTA               |                                                                                   |
|------------------------|-----------------------------------------------------------------------------------|
| POBLACION              | Población de espondilitis Axial                                                   |
| INTERVENCIÓN           | Terapia Neural - Transcutaneous electrical nerve stimulation (TENS) más ejercicio |
| COMPARACIÓN            | Cuidado Estándar                                                                  |
| DESENLACES PRINCIPALES | Efectividad- Respuesta terapéutica<br>Perfil de seguridad – Eventos Adversos      |
| ÁMBITO                 | Ambulatorio                                                                       |
| PERSPECTIVA            | Del prestador de servicios de salud                                               |
| CONFLICTO DE INTERÉS:  | No hay ninguna declaración de conflicto de interés                                |

## Evaluación

| <b>Problema</b><br>Es el problema una prioridad?                                                                                                                            |                                                                                                                                                                                                                                                                                                                                                                                                                                                                                                                                                                                                                          |                             |
|-----------------------------------------------------------------------------------------------------------------------------------------------------------------------------|--------------------------------------------------------------------------------------------------------------------------------------------------------------------------------------------------------------------------------------------------------------------------------------------------------------------------------------------------------------------------------------------------------------------------------------------------------------------------------------------------------------------------------------------------------------------------------------------------------------------------|-----------------------------|
| JUICIO                                                                                                                                                                      | EVIDENCIA DE LA INVESTIGACION                                                                                                                                                                                                                                                                                                                                                                                                                                                                                                                                                                                            | CONSIDERACIONES ADICIONALES |
| <ul style="list-style-type: none"> <li>○ No</li> <li>○ Probablemente No</li> <li>○ Probablemente Si</li> <li>○ Si</li> <li>○ Es variable</li> <li>○ No se conoce</li> </ul> | La espondiloartritis axial es una enfermedad inflamatoria autoinmune de carácter crónico, que se caracteriza por dolor lumbar crónico, rigidez y pérdida progresiva de la movilidad. Si no se trata de forma adecuada la EspAax puede producir importante discapacidad, incluida la fusión del esqueleto axial y alteración en la calidad de vida. Dentro del grupo de terapias complementarias y alternativas está la Terapia Neural o estimulación nerviosa eléctrica transcutánea (TENS). Hay estudios previos (17) (18) que han informado beneficios del TENS en este tipo de pacientes, pero son estudios antiguos. |                             |

| Efectos deseables (beneficios de la opción a recomendar)                                                                                                          |                                                                                                                                                                                                                                                                                                                                                                                                                                                                                                                                                                                                                                                                                                                                                                                                                                                                                                                                                                 |                                 |                                                                                  |            |                                            |                                 |                                                                                  |                              |                                |          |                                                               |                                                          |                                |          |                                                                |                                                |                                |          |                                                                  |
|-------------------------------------------------------------------------------------------------------------------------------------------------------------------|-----------------------------------------------------------------------------------------------------------------------------------------------------------------------------------------------------------------------------------------------------------------------------------------------------------------------------------------------------------------------------------------------------------------------------------------------------------------------------------------------------------------------------------------------------------------------------------------------------------------------------------------------------------------------------------------------------------------------------------------------------------------------------------------------------------------------------------------------------------------------------------------------------------------------------------------------------------------|---------------------------------|----------------------------------------------------------------------------------|------------|--------------------------------------------|---------------------------------|----------------------------------------------------------------------------------|------------------------------|--------------------------------|----------|---------------------------------------------------------------|----------------------------------------------------------|--------------------------------|----------|----------------------------------------------------------------|------------------------------------------------|--------------------------------|----------|------------------------------------------------------------------|
| ¿Qué tan sustanciales son los efectos deseables de la opción?                                                                                                     |                                                                                                                                                                                                                                                                                                                                                                                                                                                                                                                                                                                                                                                                                                                                                                                                                                                                                                                                                                 |                                 |                                                                                  |            |                                            |                                 |                                                                                  |                              |                                |          |                                                               |                                                          |                                |          |                                                                |                                                |                                |          |                                                                  |
| JUICIO                                                                                                                                                            | EVIDENCIA DE LA INVESTIGACION                                                                                                                                                                                                                                                                                                                                                                                                                                                                                                                                                                                                                                                                                                                                                                                                                                                                                                                                   |                                 |                                                                                  |            |                                            |                                 |                                                                                  |                              |                                |          |                                                               |                                                          |                                |          |                                                                |                                                |                                |          |                                                                  |
| CONSIDERACIONES ADICIONALES                                                                                                                                       |                                                                                                                                                                                                                                                                                                                                                                                                                                                                                                                                                                                                                                                                                                                                                                                                                                                                                                                                                                 |                                 |                                                                                  |            |                                            |                                 |                                                                                  |                              |                                |          |                                                               |                                                          |                                |          |                                                                |                                                |                                |          |                                                                  |
| <ul style="list-style-type: none"> <li>○ Triviales</li> <li>○ Pequeños</li> <li>○ Moderados</li> <li>○ Grandes</li> <li>○ Varían</li> <li>○ No se sabe</li> </ul> | Efecto del entrenamiento en Pilates en pacientes con Espondiloartritis axial <table border="1"> <thead> <tr> <th>Desenlaces</th><th>Nº de estudios (participantes) Seguimiento</th><th>Certeza de la evidencia (GRADE)</th><th>Efecto Relativo Valor promedio (SD). Cambio del puntaje entre la semana 0 y la 6</th></tr> </thead> <tbody> <tr> <td>VAS<br/>(Visual Analog Scale)</td><td>1 estudio retrospectivo (n=72)</td><td>Muy Baja</td><td>TENS: -1.9 (-2.7, -1.2)<br/>Control: -1.0 (-1.8, -0.30) p=0,08</td></tr> <tr> <td>BASFI<br/>(Bath Ankylosing Spondylitis Functional Index).</td><td>1 estudio retrospectivo (n=72)</td><td>Muy Baja</td><td>TENS: -1.2 (-1.8, -0.7)<br/>Control: -0.6 (-1.1,-0.2)<br/>p=0,19</td></tr> <tr> <td>ASQoL (Ankylosing spondylitis quality of life)</td><td>1 estudio retrospectivo (n=72)</td><td>Muy Baja</td><td>TENS: - 2.9 (-3.7, -2.0)<br/>Control: - 2.3 (-3.1,-1.5)<br/>p=0,18</td></tr> </tbody> </table> |                                 |                                                                                  | Desenlaces | Nº de estudios (participantes) Seguimiento | Certeza de la evidencia (GRADE) | Efecto Relativo Valor promedio (SD). Cambio del puntaje entre la semana 0 y la 6 | VAS<br>(Visual Analog Scale) | 1 estudio retrospectivo (n=72) | Muy Baja | TENS: -1.9 (-2.7, -1.2)<br>Control: -1.0 (-1.8, -0.30) p=0,08 | BASFI<br>(Bath Ankylosing Spondylitis Functional Index). | 1 estudio retrospectivo (n=72) | Muy Baja | TENS: -1.2 (-1.8, -0.7)<br>Control: -0.6 (-1.1,-0.2)<br>p=0,19 | ASQoL (Ankylosing spondylitis quality of life) | 1 estudio retrospectivo (n=72) | Muy Baja | TENS: - 2.9 (-3.7, -2.0)<br>Control: - 2.3 (-3.1,-1.5)<br>p=0,18 |
| Desenlaces                                                                                                                                                        | Nº de estudios (participantes) Seguimiento                                                                                                                                                                                                                                                                                                                                                                                                                                                                                                                                                                                                                                                                                                                                                                                                                                                                                                                      | Certeza de la evidencia (GRADE) | Efecto Relativo Valor promedio (SD). Cambio del puntaje entre la semana 0 y la 6 |            |                                            |                                 |                                                                                  |                              |                                |          |                                                               |                                                          |                                |          |                                                                |                                                |                                |          |                                                                  |
| VAS<br>(Visual Analog Scale)                                                                                                                                      | 1 estudio retrospectivo (n=72)                                                                                                                                                                                                                                                                                                                                                                                                                                                                                                                                                                                                                                                                                                                                                                                                                                                                                                                                  | Muy Baja                        | TENS: -1.9 (-2.7, -1.2)<br>Control: -1.0 (-1.8, -0.30) p=0,08                    |            |                                            |                                 |                                                                                  |                              |                                |          |                                                               |                                                          |                                |          |                                                                |                                                |                                |          |                                                                  |
| BASFI<br>(Bath Ankylosing Spondylitis Functional Index).                                                                                                          | 1 estudio retrospectivo (n=72)                                                                                                                                                                                                                                                                                                                                                                                                                                                                                                                                                                                                                                                                                                                                                                                                                                                                                                                                  | Muy Baja                        | TENS: -1.2 (-1.8, -0.7)<br>Control: -0.6 (-1.1,-0.2)<br>p=0,19                   |            |                                            |                                 |                                                                                  |                              |                                |          |                                                               |                                                          |                                |          |                                                                |                                                |                                |          |                                                                  |
| ASQoL (Ankylosing spondylitis quality of life)                                                                                                                    | 1 estudio retrospectivo (n=72)                                                                                                                                                                                                                                                                                                                                                                                                                                                                                                                                                                                                                                                                                                                                                                                                                                                                                                                                  | Muy Baja                        | TENS: - 2.9 (-3.7, -2.0)<br>Control: - 2.3 (-3.1,-1.5)<br>p=0,18                 |            |                                            |                                 |                                                                                  |                              |                                |          |                                                               |                                                          |                                |          |                                                                |                                                |                                |          |                                                                  |

| Efectos Indeseables                                                                                                                                               |                                                                                                                                                               |  |  |                             |
|-------------------------------------------------------------------------------------------------------------------------------------------------------------------|---------------------------------------------------------------------------------------------------------------------------------------------------------------|--|--|-----------------------------|
| ¿Qué tan sustanciales son los efectos indeseables que se pueden anticipar?                                                                                        |                                                                                                                                                               |  |  |                             |
| JUICIO                                                                                                                                                            | EVIDENCIA DE LA INVESTIGACION                                                                                                                                 |  |  | CONSIDERACIONES ADICIONALES |
| <ul style="list-style-type: none"> <li>○ Triviales</li> <li>○ Pequeños</li> <li>○ Moderados</li> <li>○ Grandes</li> <li>○ Varían</li> <li>● No se sabe</li> </ul> | El estudio no reporta efectos indeseables en ninguno de los dos grupos. Sin embargo, por las características del estudio no podemos concluir nada al respecto |  |  |                             |

  

| Certeza en la Evidencia                                                                                                                                  |                                                                                                                                                                                                                                                                                                                                                                                                                                                                                                                                 |                                 |                      |                                 |                                    |            |                  |                                                                |            |                  |                                                         |            |                  |  |  |
|----------------------------------------------------------------------------------------------------------------------------------------------------------|---------------------------------------------------------------------------------------------------------------------------------------------------------------------------------------------------------------------------------------------------------------------------------------------------------------------------------------------------------------------------------------------------------------------------------------------------------------------------------------------------------------------------------|---------------------------------|----------------------|---------------------------------|------------------------------------|------------|------------------|----------------------------------------------------------------|------------|------------------|---------------------------------------------------------|------------|------------------|--|--|
| ¿Cuál es la certeza en la evidencia global sobre los efectos de la opción a recomendar?                                                                  |                                                                                                                                                                                                                                                                                                                                                                                                                                                                                                                                 |                                 |                      |                                 |                                    |            |                  |                                                                |            |                  |                                                         |            |                  |  |  |
| JUICIO                                                                                                                                                   | EVIDENCIA DE LA INVESTIGACION                                                                                                                                                                                                                                                                                                                                                                                                                                                                                                   |                                 |                      | CONSIDERACIONES ADICIONALES     |                                    |            |                  |                                                                |            |                  |                                                         |            |                  |  |  |
| <ul style="list-style-type: none"> <li>○ Muy baja</li> <li>● Baja</li> <li>○ Moderada</li> <li>○ Alta</li> <li>○ No se identificaron estudios</li> </ul> | <table border="1"> <thead> <tr> <th>Desenlace</th> <th>Importancia Relativa</th> <th>Certeza de la evidencia (GRADE)</th> </tr> </thead> <tbody> <tr> <td>VAS (<i>Visual Analog Scale</i>)</td> <td>Importante</td> <td>⊕○○○<br/>Muy baja</td> </tr> <tr> <td>BASFI (<i>Bath Ankylosing Spondylitis Functional Index</i>).</td> <td>Importante</td> <td>⊕○○○<br/>Muy baja</td> </tr> <tr> <td>ASQoL (<i>Ankylosing spondylitis quality of life</i>)</td> <td>Importante</td> <td>⊕○○○<br/>Muy Baja</td> </tr> </tbody> </table> | Desenlace                       | Importancia Relativa | Certeza de la evidencia (GRADE) | VAS ( <i>Visual Analog Scale</i> ) | Importante | ⊕○○○<br>Muy baja | BASFI ( <i>Bath Ankylosing Spondylitis Functional Index</i> ). | Importante | ⊕○○○<br>Muy baja | ASQoL ( <i>Ankylosing spondylitis quality of life</i> ) | Importante | ⊕○○○<br>Muy Baja |  |  |
| Desenlace                                                                                                                                                | Importancia Relativa                                                                                                                                                                                                                                                                                                                                                                                                                                                                                                            | Certeza de la evidencia (GRADE) |                      |                                 |                                    |            |                  |                                                                |            |                  |                                                         |            |                  |  |  |
| VAS ( <i>Visual Analog Scale</i> )                                                                                                                       | Importante                                                                                                                                                                                                                                                                                                                                                                                                                                                                                                                      | ⊕○○○<br>Muy baja                |                      |                                 |                                    |            |                  |                                                                |            |                  |                                                         |            |                  |  |  |
| BASFI ( <i>Bath Ankylosing Spondylitis Functional Index</i> ).                                                                                           | Importante                                                                                                                                                                                                                                                                                                                                                                                                                                                                                                                      | ⊕○○○<br>Muy baja                |                      |                                 |                                    |            |                  |                                                                |            |                  |                                                         |            |                  |  |  |
| ASQoL ( <i>Ankylosing spondylitis quality of life</i> )                                                                                                  | Importante                                                                                                                                                                                                                                                                                                                                                                                                                                                                                                                      | ⊕○○○<br>Muy Baja                |                      |                                 |                                    |            |                  |                                                                |            |                  |                                                         |            |                  |  |  |



| Valores de los pacientes                                                                                                                                                                                                                                                                         |                                                                                                                                                                |                             |
|--------------------------------------------------------------------------------------------------------------------------------------------------------------------------------------------------------------------------------------------------------------------------------------------------|----------------------------------------------------------------------------------------------------------------------------------------------------------------|-----------------------------|
| ¿Hay variación o poca certeza sobre cómo valoran las personas/los pacientes los desenlaces principales?                                                                                                                                                                                          |                                                                                                                                                                |                             |
| JUICIO                                                                                                                                                                                                                                                                                           | EVIDENCIA DE LA INVESTIGACION                                                                                                                                  | CONSIDERACIONES ADICIONALES |
| <ul style="list-style-type: none"> <li>○ Variabilidad o incertidumbre importante</li> <li>○ Posiblemente hay variabilidad o incertidumbre importante</li> <li>○ Posiblemente No hay variabilidad o incertidumbre importante</li> <li>○ No hay variabilidad o incertidumbre importante</li> </ul> | No hay información                                                                                                                                             |                             |
| Balance de los efectos                                                                                                                                                                                                                                                                           |                                                                                                                                                                |                             |
| ¿El balance entre los efectos deseables e indeseables favorece la opción o el comparador?                                                                                                                                                                                                        |                                                                                                                                                                |                             |
| JUICIO                                                                                                                                                                                                                                                                                           | EVIDENCIA DE LA INVESTIGACION                                                                                                                                  | CONSIDERACIONES ADICIONALES |
| <ul style="list-style-type: none"> <li>○ Favorece al comparador</li> <li>○ Probablemente favorece al comparador</li> <li>○ No favorece al comparador ni a la opción en evaluación</li> <li>○ Probablemente favorece a la intervención</li> <li>○ Favorece la intervención</li> </ul>             | El balance de los efectos deseables e indeseables no favorece el uso de TENS a las 6 semanas, sin embargo, se trata de un estudio muy pequeño y retrospectivo. |                             |

|                                                                                                                                                                                                                                                                                                                  |                                      |                                    |
|------------------------------------------------------------------------------------------------------------------------------------------------------------------------------------------------------------------------------------------------------------------------------------------------------------------|--------------------------------------|------------------------------------|
| <input type="radio"/> Varia<br><input type="radio"/> No se sabe                                                                                                                                                                                                                                                  |                                      |                                    |
| <b>Recursos requeridos</b><br>Que tanto es el requerimiento de recursos (costos)?                                                                                                                                                                                                                                |                                      |                                    |
| <b>JUICIO</b>                                                                                                                                                                                                                                                                                                    | <b>EVIDENCIA DE LA INVESTIGACION</b> | <b>CONSIDERACIONES ADICIONALES</b> |
| <input type="radio"/> Grandes costos<br><input type="radio"/> Costos moderados<br><input type="radio"/> no significantes<br>costos ni ahorros<br><input type="radio"/> Moderados ahorros<br><input type="radio"/> Grandes ahorros<br><input type="radio"/> Varian<br><input checked="" type="radio"/> No se sabe | No hay información al respecto       |                                    |
| <b>Equidad</b><br>¿La implementación de la opción, tendrá impacto en la equidad?                                                                                                                                                                                                                                 |                                      |                                    |
| <b>Juicio</b>                                                                                                                                                                                                                                                                                                    | <b>EVIDENCIA DE LA INVESTIGACION</b> | <b>CONSIDERACIONES ADICIONALES</b> |
| <input type="radio"/> Reduce<br><input type="radio"/> Probablemente se                                                                                                                                                                                                                                           | No hay información al respecto       |                                    |

|                                                                                                                                                                                                                                                    |                                                                                                             |                                    |
|----------------------------------------------------------------------------------------------------------------------------------------------------------------------------------------------------------------------------------------------------|-------------------------------------------------------------------------------------------------------------|------------------------------------|
| reduce la equidad<br><input type="radio"/> Probablemente no impacta la equidad<br><input type="radio"/> Probablemente incrementa<br><input type="radio"/> Incrementa<br><input type="radio"/> Varía<br><input checked="" type="radio"/> No se sabe |                                                                                                             |                                    |
| <b>Aceptabilidad</b><br>¿Es la opción aceptada por los diferentes actores involucrados en su implementación?                                                                                                                                       |                                                                                                             |                                    |
| <b>JUICIO</b>                                                                                                                                                                                                                                      | <b>EVIDENCIA DE LA INVESTIGACION</b>                                                                        | <b>CONSIDERACIONES ADICIONALES</b> |
| <input type="radio"/> No<br><input type="radio"/> Probablemente no<br><input type="radio"/> Probablemente si<br><input type="radio"/> Si<br><input type="radio"/> Varía<br><input checked="" type="radio"/> No se sabe                             | No hay información al respecto                                                                              |                                    |
| <b>Factibilidad</b><br>¿Es la opción factible de IMPLEMENTAR?                                                                                                                                                                                      |                                                                                                             |                                    |
| <b>JUICIO</b>                                                                                                                                                                                                                                      | <b>EVIDENCIA DE LA INVESTIGACION</b>                                                                        | <b>CONSIDERACIONES ADICIONALES</b> |
| No<br><input type="radio"/> Probablemente no<br><input type="radio"/> Probablemente si<br><input type="radio"/> Si<br><input type="radio"/> Varía<br><input checked="" type="radio"/> No se sabe                                                   | No se encontraron estudios de factibilidad de implementación en espondiloartritis Axial con relación a TENS |                                    |

## Resumen de Juicios

|                         | JUICIOS                                 |                                                      |                                                              |                                            |                            |       |                     |
|-------------------------|-----------------------------------------|------------------------------------------------------|--------------------------------------------------------------|--------------------------------------------|----------------------------|-------|---------------------|
| PROBLEMA                | No                                      | Probablemente no                                     | Probablemente si                                             | Si                                         |                            | Varia | No se sabe          |
| EFFECTOS DESEABLES      | Trivial                                 | Pequeño                                              | Moderado                                                     | Grande                                     |                            | Varia | No se sabe          |
| EFFECTOS INDESEABLES    | Grande                                  | Moderado                                             | Pequeño                                                      | Trivial                                    |                            | Varia | No se sabe          |
| CERTEZA EN LA EVIDENCIA | Muy Bajo                                | Bajo                                                 | Moderado                                                     | Alto                                       |                            |       | No incluyó estudios |
| VALORES DE PACIENTES    | Importante incertidumbre o variabilidad | Posiblemente importante incertidumbre o variabilidad | Probablemente no hay importante incertidumbre o variabilidad | No importante incertidumbre o variabilidad |                            |       |                     |
| BALANCE DE LOS EFECTOS  | Favorece al comparador                  | Probablemente Favorece al comparador                 | No favorece ni a la intervención ni al comparador            | Probablemente favorece a la intervención   | Favorece a la intervención | Varia | No se sabe          |
| RECURSOS REQUERIDOS     | Grandes costos                          | Moderados costos                                     | Costos y ahorros insignificantes                             | Moderados ahorros                          | Grandes ahorros            | Varia | No se sabe          |
| EQUIDAD                 | Reducida                                | Probablemente reducida                               | Probablemente no impactada                                   | Probablemente incrementada                 | Incrementada               | Varia | No se sabe          |
| ACEPTABILIDAD           | No                                      | Probablemente no                                     | Probablemente si                                             | Si                                         |                            | Varia | No se sabe          |
| FACTIBILIDAD            | No                                      | Probablemente no                                     | Probablemente si                                             | Si                                         |                            | Varia | No se sabe          |

Tipo de Recomendación

|                                             |                                                  |                                                                            |                                                |                                           |
|---------------------------------------------|--------------------------------------------------|----------------------------------------------------------------------------|------------------------------------------------|-------------------------------------------|
| Recomendación fuerte en contra de la opción | Recomendación condicional en contra de la opción | Recomendación condicional a favor de cualquiera, la opción o su comparador | Recomendación condicional a favor de la opción | Recomendación fuerte a favor de la opción |
| ○                                           | ○                                                | ○                                                                          | ○                                              | ○                                         |

Conclusiones

Recomendación

En pacientes con EspAax se sugiere no usar terapias no convencionales como única opción de tratamiento Recomendación condicional en contra de la intervención. Certeza de la evidencia baja.

Justificación

Certeza de evidencia muy baja, sin datos aún.

Consideraciones por subgrupos

No se identifican como necesarias.

### Consideraciones de implementación

No aplica.

### Monitoreo y evaluación de cumplimiento

No aplica.

### Prioridades de investigación futura

Se hace necesario el diseño de protocolos de investigación estandarizados, con rigor metodológico y un número de pacientes suficiente que permitan en un futuro tener evidencia a favor o en contra de la práctica de TENS para el tratamiento de pacientes con dolor crónico secundario a Espondiloartritis Axial

## Apéndice 1. Metaanálisis Acupuntura vs DMARDs (7)

### 1. Acupuntura sola vs DMARDs “Respuesta clínica”

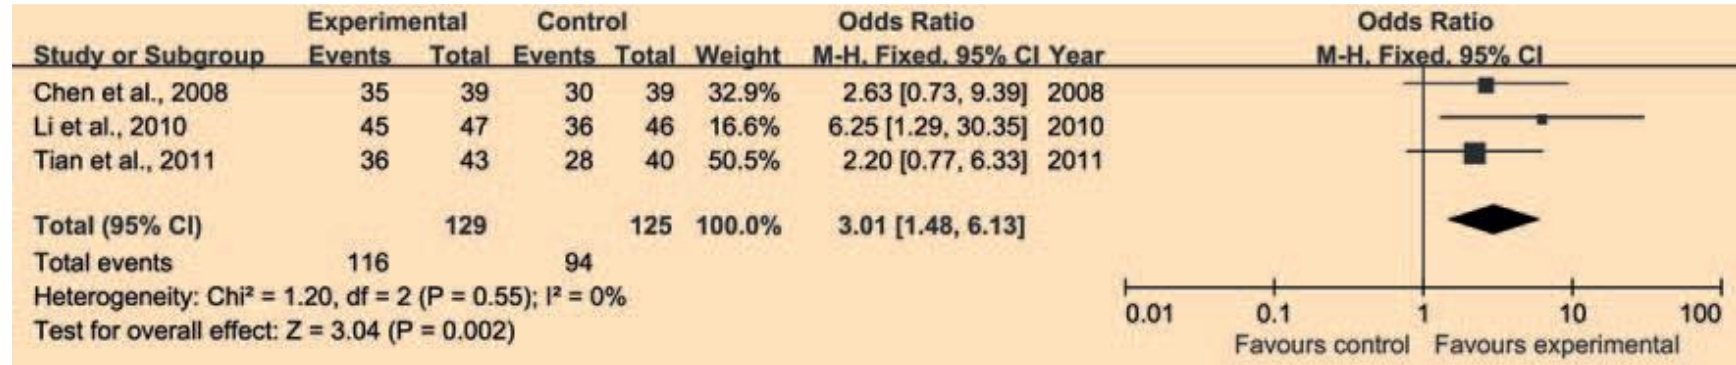

### 2. Acupuntura sola vs DMARDs “Velocidad de Sedimentación Globular”

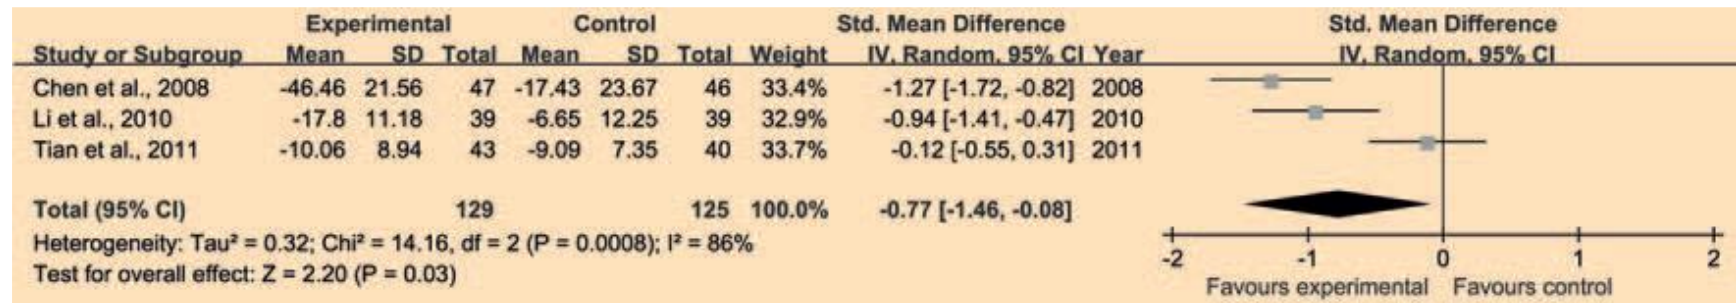

### 3. Acupuntura más DMARDs vs DMARDs solos “Respuesta clínica”

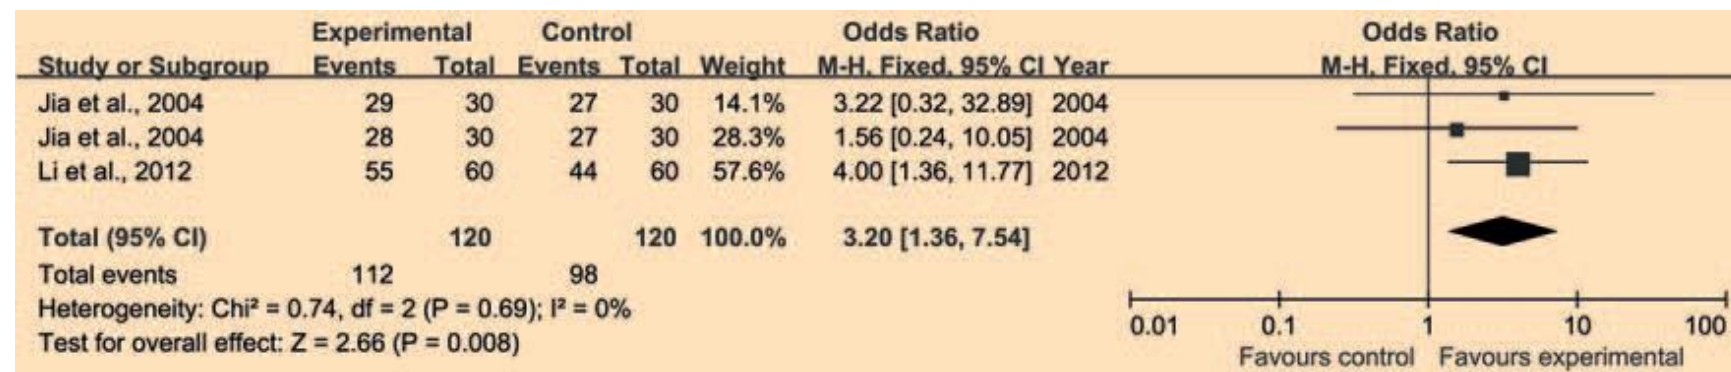

### 4. Acupuntura más DMARDs vs DMARDs solos “Separación de la cabeza de la pared”

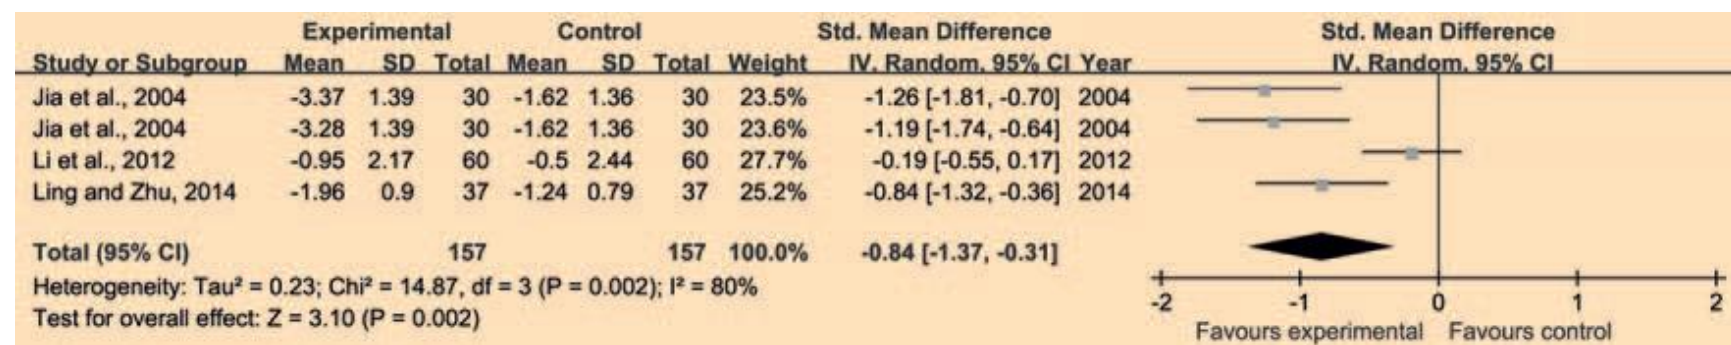



## 5. Acupuntura más DMARDs vs DMARDs solos “Distancia del dedo al piso”

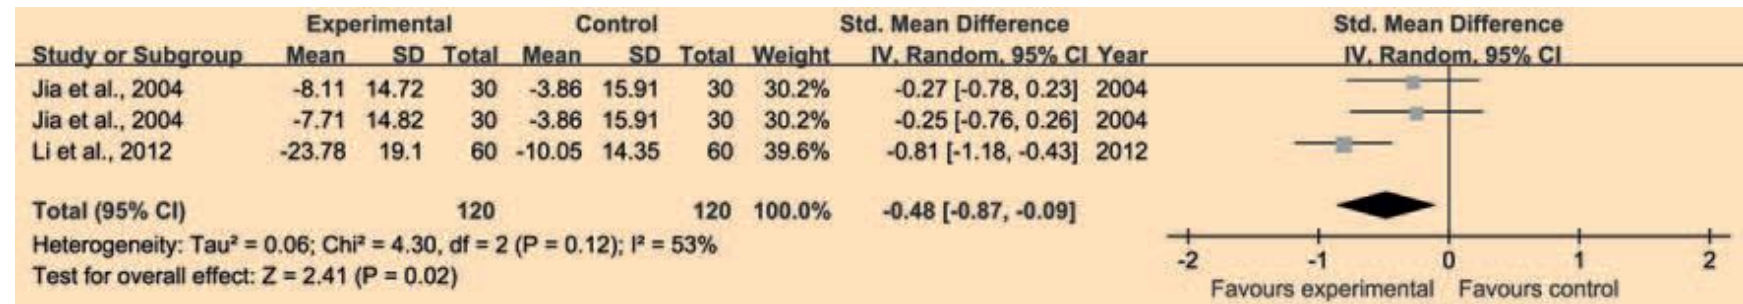

## 6. Acupuntura más DMARDs vs DMARDs solos “Expansión torácica”

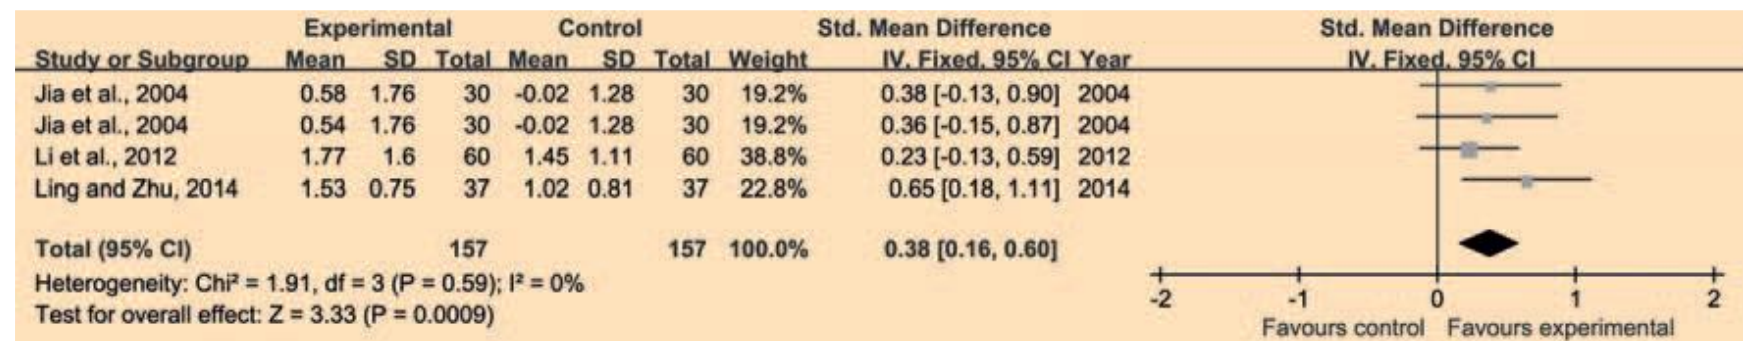

# 7. Acupuntura más DMARDs vs DMARDs solos “Proteína C Reactiva”

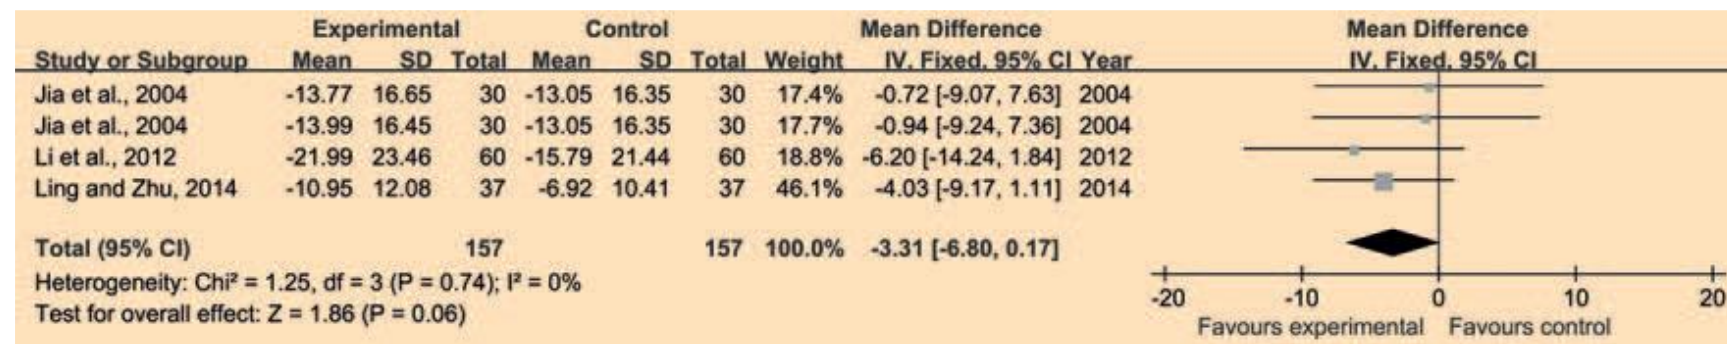

## Apéndice 2. Tablas GRADE

1. Efectividad (Acupuntura sola vs DMARDs “Respuesta clínica” La respuesta clínica se evaluó en una escala que va de la remisión clínica a un tratamiento ineficaz)

| Certeza     |        |                 |                |                     |             |                       | Nº pacientes |        | efecto                              | Certeza      | Importancia |
|-------------|--------|-----------------|----------------|---------------------|-------------|-----------------------|--------------|--------|-------------------------------------|--------------|-------------|
| Nº estudios | Diseño | riesgo de sesgo | inconsistencia | evidencia indirecta | Imprecisión | Otras consideraciones | Acupuntura   | DMARDs | Relativo                            |              |             |
|             |        |                 |                |                     |             |                       |              |        | (95% CI)                            |              |             |
| 3           | ECAs   | serio           | Seria          | Seria               | Seria       | No                    | 129          | 125    | Odds Ratio<br>3.01<br>(1.48 a 6,13) | ⊕⊕○○<br>Baja | Importante  |

2. Efectividad Acupuntura sola vs DMARDs “Velocidad de Sedimentación Globular”

| Certeza     |        |                 |                |                     |             |                       | Nº pacientes |        | efecto                                              | Certeza      | Importancia |
|-------------|--------|-----------------|----------------|---------------------|-------------|-----------------------|--------------|--------|-----------------------------------------------------|--------------|-------------|
| Nº estudios | Diseño | riesgo de sesgo | inconsistencia | evidencia indirecta | Imprecisión | Otras consideraciones | Acupuntura   | DMARDs | Relativo                                            |              |             |
|             |        |                 |                |                     |             |                       |              |        | (95% CI)                                            |              |             |
| 3           | ECAs   | serio           | Seria          | Seria               | Seria       | No                    | 129          | 125    | Std, Mean<br>Difference<br>-0.77<br>(-1.41 a -0,08) | ⊕⊕○○<br>Baja | Importante  |

3. Efectividad Acupuntura más DMARDs vs DMARDs solos “Respuesta clínica”

| Certeza     |        |                 |                |                     |             |                       | Nº pacientes |        | efecto                              | Certeza      | Importancia |
|-------------|--------|-----------------|----------------|---------------------|-------------|-----------------------|--------------|--------|-------------------------------------|--------------|-------------|
| Nº estudios | Diseño | riesgo de sesgo | inconsistencia | evidencia indirecta | Imprecisión | Otras consideraciones | Acupuntura   | DMARDs | Relativo                            |              |             |
|             |        |                 |                |                     |             |                       |              |        | (95% CI)                            |              |             |
| 3           | ECAs   | serio           | Seria          | Seria               | Seria       | No                    | 120          | 120    | Odds Ratio<br>3.20<br>(1.36 a 7.54) | ⊕⊕○○<br>Baja | Importante  |

4. Efectividad Acupuntura más DMARDs vs DMARDs solos “Separación de la cabeza de la pared”

| Certeza     |        |                 |                |                     |             |                       | Nº pacientes |        | efecto                                           | Certeza      | Importancia |
|-------------|--------|-----------------|----------------|---------------------|-------------|-----------------------|--------------|--------|--------------------------------------------------|--------------|-------------|
| Nº estudios | Diseño | riesgo de sesgo | inconsistencia | evidencia indirecta | Imprecisión | Otras consideraciones | Acupuntura   | DMARDs | Relativo<br>(95% CI)                             |              |             |
| 3           | ECAs   | serio           | Seria          | Seria               | Seria       | No                    | 157          | 157    | Std. Mean Difference<br>-0.84<br>(-1.37 a -0.31) | ⊕⊕○○<br>Baja | Importante  |

5. Efectividad Acupuntura más DMARDs vs DMARDs solos “Distancia del dedo al piso”

| Certeza     |        |                 |                |                     |             |                       | Nº pacientes |        | efecto                                           | Certeza      | Importancia |
|-------------|--------|-----------------|----------------|---------------------|-------------|-----------------------|--------------|--------|--------------------------------------------------|--------------|-------------|
| Nº estudios | Diseño | riesgo de sesgo | inconsistencia | evidencia indirecta | Imprecisión | Otras consideraciones | Acupuntura   | DMARDs | Relativo<br>(95% CI)                             |              |             |
| 3           | ECAs   | serio           | Seria          | Seria               | Seria       | No                    | 120          | 120    | Std. Mean Difference<br>-0.48<br>(-0.87 a -0.09) | ⊕⊕○○<br>Baja | Importante  |

6. Efectividad Acupuntura más DMARDs vs DMARDs solos “Expansión torácica”

| Certeza     |        |                 |                |                     |             |                       | Nº pacientes |        | efecto                                         | Certeza      | Importancia |
|-------------|--------|-----------------|----------------|---------------------|-------------|-----------------------|--------------|--------|------------------------------------------------|--------------|-------------|
| Nº estudios | Diseño | riesgo de sesgo | inconsistencia | evidencia indirecta | Imprecisión | Otras consideraciones | Acupuntura   | DMARDs | Relativo<br>(95% CI)                           |              |             |
| 3           | ECAs   | serio           | Seria          | Seria               | Seria       | No                    | 157          | 157    | Std. Mean Difference<br>0.38<br>(0.11 to 0.60) | ⊕⊕○○<br>Baja | Importante  |

7. Efectividad Acupuntura más DMARDs vs DMARDs solos “Proteína C Reactiva”

| Certeza     |        |                 |                |                     |             |                       | Nº pacientes |        | efecto                                        | Certeza      | Importancia |
|-------------|--------|-----------------|----------------|---------------------|-------------|-----------------------|--------------|--------|-----------------------------------------------|--------------|-------------|
| Nº estudios | Diseño | riesgo de sesgo | inconsistencia | evidencia indirecta | Imprecisión | Otras consideraciones | Acupuntura   | DMARDs | Relativo<br>(95% CI)                          |              |             |
| 3           | ECAs   | serio           | Seria          | Seria               | Seria       | No                    | 157          | 157    | Mean<br>Difference<br>-3.31<br>(-6.80 a 0.17) | ⊕⊕○○<br>Baja | Importante  |

## Referencias

1. Rudwaleit M, van der Heijde D, Landewe R, Listing J, Akkoc N, Brandt J, et al. The development of Assessment of SpondyloArthritis international Society classification criteria for axial spondyloarthritis (part II): validation and final selection. *Annals of the Rheumatic Diseases* [Internet]. 2009 Jun 1;68(6):777–83. Available from: <http://ard.bmj.com/cgi/doi/10.1136/ard.2009.108233>
2. Ward MM, Deodhar A, Akl EA, Lui A, Ermann J, Gensler LS, et al. American College of Rheumatology/Spondylitis Association of America/Spondyloarthritis Research and Treatment Network 2015 Recommendations for the Treatment of Ankylosing Spondylitis and Nonradiographic Axial Spondyloarthritis. *Arthritis Care & Research* [Internet]. 2016 Feb;68(2):151–66. Available from: <http://doi.wiley.com/10.1002/acr.22708>
3. Baeten D, Baraliakos X, Braun J, Sieper J, Emery P, van der Heijde D, et al. Anti-interleukin-17A monoclonal antibody secukinumab in treatment of ankylosing spondylitis: a randomised, double-blind, placebo-controlled trial. *The Lancet* [Internet]. 2013 Nov;382(9906):1705–13. Available from: <https://linkinghub.elsevier.com/retrieve/pii/S0140673613611344>
4. Sakkas LI, Zafiriou E, Bogdanos DP. Mini Review: New Treatments in Psoriatic Arthritis. Focus on the IL-23/17 Axis. *Frontiers in Pharmacology* [Internet]. 2019 Aug 6;10. Available from: <https://www.frontiersin.org/article/10.3389/fphar.2019.00872/full>
5. von Stebut E, Boehncke W-H, Ghoreschi K, Gori T, Kaya Z, Thaci D, et al. IL-17A in Psoriasis and Beyond: Cardiovascular and Metabolic Implications. *Frontiers in Immunology* [Internet]. 2020 Jan 15;10. Available from: <https://www.frontiersin.org/article/10.3389/fimmu.2019.03096/full>
6. Nishishinya Aquino MB, Pereda CA, Muñoz-Ortego J. Efficacy of acupuncture in rheumatic diseases with spine involvement: Systematic review. Vol. 153, *Medicina Clinica*. Ediciones Doyma, S.L.; 2019. p. 250–5.
7. Lv Z, Zhou X, Chen A. Akupunktur versus krankheitsmodifizierende Antirheumatika in der Behandlung der ankylosierenden Spondylitis - eine Metaanalyse. *Complementary Medicine Research* [Internet]. 2015;22(6):395–402. Available from: <https://www.karger.com/Article/FullText/442733>
8. Lautenschläger J. Akupunktur bei der Behandlung entzündlich-rheumatischer Erkrankungen (Acupuncture in treatment of inflammatory rheumatoid diseases). *Zeitschrift für Rheumatologie* [Internet]. 1997 Mar 3;56(1):8–20. Available from: <http://link.springer.com/10.1007/s003930050016>
9. Byrnes K, Wu PJ, Whillier S. Is Pilates an effective rehabilitation tool? A systematic review. Vol. 22, *Journal of Bodywork and Movement Therapies*. Churchill Livingstone; 2018. p. 192–202.
10. Cruz JC, Liberali R, Cruz TMF da, Netto MIA. The Pilates method in the rehabilitation of musculoskeletal disorders: a systematic review. *Fisioterapia em Movimento*. 2016 Sep;29(3):609–22.
11. Pécourneau V, Degboé Y, Barnetche T, Cantagrel A, Constantin A, Ruysen-Witrand A. Effectiveness of Exercise Programs in Ankylosing Spondylitis: A Meta-Analysis of Randomized

Controlled Trials. Vol. 99, Archives of Physical Medicine and Rehabilitation. W.B. Saunders; 2018. p. 383-389.e1.

12. Rodríguez-López ES, Garnacho-Garnacho VE, Guodemar-Pérez J, García-Fernández P, Ruiz-López M. One Year of Pilates Training for Ankylosing Spondylitis: A Pilot Study. *Journal of Alternative and Complementary Medicine*. 2019 Oct 1;25(10):1054–61.

13. Roşu MO, Ţopa I, Chirieac R, Ancuta C. Effects of Pilates, McKenzie and Heckscher training on disease activity, spinal motility and pulmonary function in patients with ankylosing spondylitis: A randomized controlled trial. *Rheumatology International*. 2014 Mar;34(3):367–72.

14. Altan L, Korkmaz N, Dizdar M, Yurtkuran M. Effect of Pilates training on people with ankylosing spondylitis. *Rheumatology International*. 2012;32(7):2093–9.

15. Chen F-C, Jin Z-L, Wang D-F. A retrospective study of transcutaneous electrical nerve stimulation for chronic pain following ankylosing spondylitis. *Medicine [Internet]*. 2018 Jul;97(27):e11265. Available from: <http://journals.lww.com/00005792-201807060-00019>

16. Akyuz G, Kenis-Coskun O. The Efficacy of Tai Chi and Yoga in Rheumatoid Arthritis and Spondyloarthropathies: A narrative biomedical review. Vol. 38, *Rheumatology International*. Springer Verlag; 2018. p. 321–30.

17. Nienhuis RLF, Hoekstra AJ. Transcutaneous electronic nerve stimulation in ankylosing spondylitis. *Arthritis & Rheumatism [Internet]*. 1984 Sep;27(9):1074–5. Available from: <http://doi.wiley.com/10.1002/art.1780270927>

18. Gemignani G, Olivieri I, Ruju G, Pasero G. Transcutaneous electrical nerve stimulation in ankylosing spondylitis: A double-blind study. *Arthritis & Rheumatism [Internet]*. 1991 Jun;34(6):788–9. Available from: <http://doi.wiley.com/10.1002/art.1780340624>

## Pregunta 11:

¿Cuál es la utilidad (características de la prueba\*) de las escalas de clinimetría (1- ASDAS- "Ankylosing Spondylitis Disease Activity Score" 2- BASDAI - "Bath Ankylosing Spondylitis Disease Activity Index") para evaluar la actividad de la enfermedad en pacientes adultos con Espondiloartritis Axial?

*\*Propiedades psicométricas: Fiabilidad (reliability), sensibilidad al cambio, capacidad discriminativa, consistencia interna*

|                     |                                                                                                                             |
|---------------------|-----------------------------------------------------------------------------------------------------------------------------|
| <b>Población</b>    | Pacientes con espondiloartritis (EspAax)                                                                                    |
| <b>Intervención</b> | ASDAS<br>BASDAI                                                                                                             |
| <b>Comparación</b>  |                                                                                                                             |
| <b>Desenlaces</b>   | Propiedades psicométricas: Fiabilidad (reliability), sensibilidad al cambio, capacidad discriminativa, consistencia interna |

### Antecedentes

La evaluación de la actividad en espondiloartritis axial (EspAax) es compleja y multifactorial, dado que los pacientes muestran heterogeneidad fenotípica en las manifestaciones de la enfermedad

El BASDAI (Bath Ankylosing Spondylitis Activity Index) ha sido ampliamente utilizado en la medición de actividad clínica en pacientes con EspAax y es un índice sensible al cambio, se trata de un índice combinado compuesto por 6 ítems que valoran la fatiga, el dolor axial, la afección articular periférica, la entesopatía y la intensidad y la duración de la rigidez matutina (1) se ha establecido por consensos internacionales (2) un punto de corte de igual o mayor de 4 para definir actividad y así mismo es el criterio más seleccionado en los ensayos clínicos con terapias biológicas. El BASDAI ha sido validado en cohortes prospectivas mostrando su utilidad como instrumento en la evaluación de la actividad de la enfermedad (3)

El ASDAS (ASAS-endorsed Disease Activity Score) es un índice compuesto de actividad de la enfermedad, que integra parámetros subjetivos de valoración de actividad del paciente con EspAax incluidos en el BASDAI como son el auto reporte de dolor lumbar, la duración de la rigidez matutina, dolor o edema articular periférico, la sensación de bienestar general y reactantes de fase aguda (VSG o PCR). A partir de este índice se han considerado 4 estadios de actividad: enfermedad inactiva si ASDAS  $\leq 1,3$ ; actividad baja ASDAS 1,3-2,1; actividad alta ASDAS 2,1-3,5 y actividad muy alta si el ASDAS es  $>3,5$ .



## Evidencia

La búsqueda de la evidencia No identificó revisiones sistemáticas de pruebas diagnósticas que compararan las características operativas de las escalas de actividad de la enfermedad, se identificaron cuatro estudios que se describen a continuación.

### Consistencia interna y confiabilidad

En Singapur en 2019 se condujo un estudio de corte transversal cuyo objetivo fue evaluar la validez y confiabilidad del ASDAS evaluado con PCR y BASDAI en pacientes con EspAax (4), se incluyeron 280 pacientes (78% hombres), la consistencia interna fue evaluada usando el alfa de Cronbach La validez estructural se evaluó mediante un análisis factorial confirmatorio utilizando el método de máxima verosimilitud, donde el índice de ajuste comparativo (CFI) > 0,95, el índice de Tucker-Lewis (TLI) > 0,95, el error cuadrático medio de aproximación (RMSEA) < 0,06 y los residuos medios estandarizados de raíz (SRMR) < 0,08 fueron indicativos de buen ajuste. El ASDAS mostro una pobre consistencia interna de 0.33 lo cual los autores lo atribuyeron a la utilización de la PCR, mientras que el BASDAI mostro una alta consistencia interna de 0.87. Por medio del coeficiente de Spearman se encontró una alta correlación entre los dos índices 0.75, lo cual demuestra que ambos índices miden el mismo constructo de actividad, los autores concluyeron que el estudio apoyaba el uso de estos dos índices en la medición de la actividad de la enfermedad en pacientes con EspAax en Singapur.

### Capacidad discriminativa

Kilic y cols (5) en 2015 condujeron un estudio cuyo objetivo fue evaluar la capacidad discriminativa del ASDAS PCR, ASDAS VSG comparado con el BASDAI como herramientas clínicas para la medición de la actividad de la enfermedad en pacientes con EspAax y EspAax-nr. Los sujetos fueron reclutados de la cohorte Erciyes Spondyloarthritis Cohort (ESPAC) y los pacientes incluidos fueron mayores de 18 años. Se utilizaron las curvas ROC para comparar la capacidad discriminatoria de las versiones ASDAS y BASDAI de acuerdo con cinco criterios externos diferentes. Se incluyeron 287 pacientes de los cuales 132 tenían EspAax-nr, los cuales fueron categorizados con actividad alta o baja de acuerdo con la remisión parcial global de ASAS, del paciente, remisión global del médico, con / sin uso de DMARD o anti-TNF y con o sin artritis periférica. No se encontraron diferencias estadísticamente significativas entre las curvas ROC de ASDAS y BASDAI frente a ninguno de los 5 criterios:

-Actividad alta o baja de acuerdo con la remisión parcial global de ASAS: AUC IC 95%

ASDAS PCR 0.91 (0.85–0.96), ASDAS VSG 0.89 (0.82–0.94), BASDAI 0.92 (0.86–0.96)

- Valoración general de la enfermedad por el paciente: AUC IC 95%

ASDAS PCR 0.88 (0.80–0.93), ASDAS VSG 0.85 (0.77–0.91), BASDAI 0.88 (0.80–0.93)

Valoración global del médico: AUC IC 95%

ASDAS PCR 0.90 (0.82–0.95), ASDAS VSG 0.91 (0.84–0.96), BASDAI 0.89 (0.81–0.95)

DMARD o Anti TNF +/-: AUC IC 95%

ASDAS PCR 0.51 (0.43–0.60), ASDAS VSG 0.53 (0.44–0.62), BASDAI 0.53 (0.45–0.62)

Artritis periférica +/- : AUC IC 95%

## GPC para pacientes con Espondiloartritis Axial ASOREUMA

ASDAS PCR 0.59 (0.50–0.67), ASDAS VSG 0.65 (0.56–0.73), BASDAI 0.65 (0.56–0.73)

Los autores consideraron que la capacidad discriminativa de ASDAS-CRP, ASDAS-ESR y BASDAI fue similar en pacientes con EspAax y EspAax-nr tanto para pacientes asignados a baja actividad de la enfermedad como alta actividad de acuerdo a criterios de remisión ASAS y puntajes de evaluación global de paciente y médico.

En 2012 Ling y cols (6) condujeron un estudio en China con el objetivo de evaluar el desempeño del ASDAS y compararlo con el BASDAI. La capacidad discriminativa fue comparada por: diferencia estandarizada de medias (SMD),  $R^2$  en regresión lineal y área bajo la curva de las características operativas del receptor en modelos de regresión logística. En general la habilidad discriminatoria del VASDAI y ASDAS fue comparable en el contexto de estado de la actividad de la enfermedad alto y bajo. Cuando los puntajes de evaluación global de los pacientes fueron  $\geq 4$  y  $< 4$  fueron usados para definir actividad de la enfermedad alta o baja; el SMD de BASDAI y ASDAS fue 1.89 (IC 95% 1.52-2.25) y 1.73 (IC 95% 1.37-2.09) respectivamente, para los puntajes de evaluación global del médico de  $\geq 4$  y  $< 4$  (alta y baja actividad) la SMD de BASDAI y ASDAS fue 1.72 (IC 95% 1.36-2.08) y 1.69 (IC 95% 1.23-1.93). Tanto BASDAI como ASDAS mostraron una buena habilidad de discriminación evidenciada por áreas bajo la curva altas ( $>0.8$ ) y un valor alto de  $R^2$  0.6-0.7.

## Sensibilidad al cambio

Sellas y cols en 2017 (7) condujeron un estudio cuyo objetivo fue evaluar la utilidad clínica del ASDAS comparada con el BASDAI para evaluar la actividad de la enfermedad EspAax, fue un estudio observacional prospectivo conducido en 23 centros, se incluyeron 127 pacientes con un promedio de edad de 45.8 años (SD 12.6). Los resultados de sensibilidad al cambio, medidos por la diferencia del puntaje entre la línea basal y la visita de 12 meses mostraron:

|                                    | Visita basal – Visita 12 meses |                    |           |             |
|------------------------------------|--------------------------------|--------------------|-----------|-------------|
| Cambios de ASDAS                   | n                              | Promedio de cambio | IC 95%    | Delta Cohen |
| Mejoría PASS evaluada por médico   | 59                             | 1.85               | 1.46–2.24 | 1.229       |
| Mejoría PASS evaluada por paciente | 48                             | 2.11               | 1.69–2.54 | 1.445       |
| Cambios de BASDAI                  |                                |                    |           |             |
| Mejoría PASS evaluada por médico   | 68                             | 3.84               | 3.38–4.31 | 2.008       |
| Mejoría PASS evaluada por paciente | 56                             | 4.01               | 3.51–4.52 | 2.128       |
| Cambio de ASDAS                    |                                |                    |           |             |
| Con criterios BASDAI 50            | 45                             | 2.38               | 1.99–2.77 | 1.783       |

Tanto el BASDAI como el ASDAS mostraron sensibilidad al cambio en pacientes que cambiaron de un estado sintomático inaceptable a un estado aceptable según los criterios PASS (médico y paciente) y según los criterios de respuesta de BASDAI 50 (Cohen  $\delta > 0.80$ ).

## Valores y preferencia de pacientes

Torre-Alonso y colaboradores (8) condujeron en 2018 una revisión sistemática de la literatura con el objetivo de evaluar los desenlaces reportados por pacientes (PRO) en sujetos de la unión europea con diagnóstico de espondiloartritis. Se incluyeron 26 publicaciones en español y en inglés que evaluaran la calidad de vida, satisfacción, adherencia/cumplimiento, persistencia con el tratamiento, preferencia de los pacientes con respecto a aspectos de la enfermedad que afectan la vida diaria.

Con respecto a calidad de vida, se incluyeron 18 publicaciones de las cuales 13 utilizaron instrumentos genéricos de calidad de vida relaciona con salud y cuatro usaron cuestionarios enfermedad específica. Uno de los estudios (9) encontró que dos de cada tres pacientes con EA consideraron el dolor como un factor importante que afectaba la calidad de vida, el 50% de los pacientes indico la necesidad de asistencia para las actividades de la vida diaria y alteración en la vida familiar que potencialmente influencia negativamente la calidad de vida relacionada con salud. Los hombres jóvenes estaban más preocupados por el riesgo de perder su trabajo que los mayores y por el deterioro de la vida sexual debido a enfermedad que las mujeres. Respecto a las preferencias, la revisión reporta que la movilidad y la función física fueron los desenlaces más importantes para los pacientes. Un estudio correlaciono un instrumento del funcionamiento físico (BASFI), evaluación de la actividad física desde la perspectiva de los pacientes (BASDAI) y la calidad de vida relacionada con salud (HRQoL) (10) mostrando que el BASFI y el BASDI fueron las principales mediciones del estado de salud (11).

Dougados y cols (12) evaluaron la relación entre la actividad de la enfermedad y los desenlaces reportados por pacientes (PROs) en pacientes con espondiloartritis axial no radiográfica (EspAax-nr), para lo cual se realizó un análisis pos- Hoc EMBARK en el cual (13) en el cual los PROs fueron agrupados de acuerdo a los estadios de actividad de la enfermedad y pacientes que alcanzaron una mejoría del 50% en el BASDAI. Altos índices de actividad ASDAS a las 104 semanas se asociaron con menor mejoría a largo plazo en los PROs: Dolor de espalda evaluado con escala análoga visual en cm IC 95% -4.58 (-4.95 a -4.21), IC 95% - 3.86 (- 4.28, - 3.43), IC 95% -2.15 (-2.68, -1.61), y IC 95% 1.30 (-0.51, 3.12) para inactivo, baja, alta y muy alta actividad de la enfermedad evaluada con ASDAS; los sujetos que no alcanzaron una respuesta del 50% en el BASDAI o no respondedores tuvieron menor mejoría en los PROs comparado con los respondedores ( dolor de espalda - 1.61 (- 2.05, - 1.18) vs. -4.43 (- 4.69, - 4.18); MFI índice de fatiga general - 0.01 (- 1.12, 1.09) vs. -4.30 (- 4.98, - 3.62); all  $p < 0.001$ ).

## Costos

Se identifico un estudio publicado en 2008 por Zhu (14) cuyo objetivo fue evaluar los costos anuales directos, indirectos y sociales de la EspAax en una población china, se condujo un estudio no aleatorio, de corte trasversal en 145 pacientes reclutados entre 2005 y 2006. Los costos fueron determinados desde la perspectiva social, lo cual significa que todos los costos son relevantes. Los costos directos representaban toda la utilización de recursos en salud en los 12 meses previos. De los pacientes ingresados 79% fueron hombres con un promedio de edad de 40 años (DE 11.1), el promedio de BASDAI fue de 4.7 (DE 2.1). Ninguno de los participantes había recibido biológicos durante el periodo de estudio. El promedio anual de costos fue de 9120 dólares americanos, de los

## GPC para pacientes con Espondiloartritis Axial ASOREUMA

cuales los costos indirectos representaron el 62%, dentro de los determinantes del costo se documentó que el BASDAI influenciaba los costos directos, pero no se correlacionaba con los costos (análisis de regresión lineal Coeficiente 0.05 por unidad de BASDAI (-0.1, 0.2) p:0.5) mientras que el deterioro funcional representaba el principal determinante de los costos.

## Marco de trabajo –De la evidencia a las decisiones

| <i>PREGUNTA</i>        |                                                                                                                             |
|------------------------|-----------------------------------------------------------------------------------------------------------------------------|
| POBLACION              | Pacientes con espondiloartritis (EPA) axial                                                                                 |
| INTERVENCIÓN           | ASDAS<br>BASDAI                                                                                                             |
| COMPARACIÓN            |                                                                                                                             |
| DESENLACES PRINCIPALES | Propiedades psicométricas: Fiabilidad (reliability), sensibilidad al cambio, capacidad discriminativa, consistencia interna |
| ÁMBITO                 | Ambulatorio                                                                                                                 |
| PERSPECTIVA            | Del grupo desarrollador de la Guía                                                                                          |
| CONFLICTO DE INTERÉS:  | No hay declaración de ningún conflicto de interés                                                                           |

## Evaluación

| Problema                                                                                                                                                                    |                                                                                                                                                                                                                                                                                                                                                                                                                                                                                                                                                                                                                                                    |                                                                                                                                                                                                                                                                                                                                                             |
|-----------------------------------------------------------------------------------------------------------------------------------------------------------------------------|----------------------------------------------------------------------------------------------------------------------------------------------------------------------------------------------------------------------------------------------------------------------------------------------------------------------------------------------------------------------------------------------------------------------------------------------------------------------------------------------------------------------------------------------------------------------------------------------------------------------------------------------------|-------------------------------------------------------------------------------------------------------------------------------------------------------------------------------------------------------------------------------------------------------------------------------------------------------------------------------------------------------------|
| Es el problema una prioridad?                                                                                                                                               |                                                                                                                                                                                                                                                                                                                                                                                                                                                                                                                                                                                                                                                    |                                                                                                                                                                                                                                                                                                                                                             |
| JUICIO                                                                                                                                                                      | EVIDENCIA DE LA INVESTIGACION                                                                                                                                                                                                                                                                                                                                                                                                                                                                                                                                                                                                                      | CONSIDERACIONES ADICIONALES                                                                                                                                                                                                                                                                                                                                 |
| <ul style="list-style-type: none"> <li>○ No</li> <li>○ Probablemente No</li> <li>○ Probablemente Si</li> <li>○ Si</li> <li>○ Es variable</li> <li>○ No se conoce</li> </ul> | <p>La espondiloartritis axial es una enfermedad sistémica, en la que la inflamación es el principal marcador, dado que afecta varios lugares y estructuras del cuerpo humano, puede dar signos y síntomas variados. Cada uno de esos síntomas puede ser evaluado en la práctica clínica por diferentes instrumentos, pero lo ideal es emplear evaluaciones multidimensionales que permitan la mejor comprensión del estado de la enfermedad (15).</p> <p>Los índices de evaluación de la actividad son relevantes para monitorizar la actividad de la enfermedad, determinar inicio de manejos farmacológicos y evaluar la respuesta al mismo.</p> | <p>Considero como índice más preciso para medir la actividad el uso de asdas, que incluye no solo la evaluación subjetiva del paciente si no también variables biológicas medidas “indirectas” de inflamación como la vsg y pcr, siendo esta particularmente mas sensible y de menor variabilidad. Debe incentivarse el uso de asdas con pcr sobre vsg.</p> |

| Efectos deseables (beneficios de la opción a recomendar)                                                                                                                 |                                                                                                             |                                                                                                                                                                                                                                                                                                                                                 |
|--------------------------------------------------------------------------------------------------------------------------------------------------------------------------|-------------------------------------------------------------------------------------------------------------|-------------------------------------------------------------------------------------------------------------------------------------------------------------------------------------------------------------------------------------------------------------------------------------------------------------------------------------------------|
| ¿Qué tan sustanciales son los efectos deseables de la opción?                                                                                                            |                                                                                                             |                                                                                                                                                                                                                                                                                                                                                 |
| JUICIO                                                                                                                                                                   | EVIDENCIA DE LA INVESTIGACION                                                                               | CONSIDERACIONES ADICIONALES                                                                                                                                                                                                                                                                                                                     |
| <ul style="list-style-type: none"> <li>○ Triviales</li> <li>○ Pequeños</li> <li>○ <b>Moderados</b></li> <li>○ Grandes</li> <li>○ Varían</li> <li>○ No se sabe</li> </ul> | Claramente su aplicación redunda en la mejor toma de decisiones. Idealmente deberíamos tener ambas medidas. | Acción 100% favorable al paciente y sin ningún riesgo para el. Sin embargo, debería evaluarse la diferencia entre los cuestionarios de autoevaluación diligenciados sin asistencia (orientación) y con la asistencia de personal médico o paramédico y tener la certeza de la necesidad o no de un entrenamiento (educación) previo al paciente |

| Efectos Indeseables                                                                                                                                                      |                                                                                                                                                                                                                                     |                             |
|--------------------------------------------------------------------------------------------------------------------------------------------------------------------------|-------------------------------------------------------------------------------------------------------------------------------------------------------------------------------------------------------------------------------------|-----------------------------|
| ¿Qué tan sustanciales son los efectos indeseables que se pueden anticipar?                                                                                               |                                                                                                                                                                                                                                     |                             |
| JUICIO                                                                                                                                                                   | EVIDENCIA DE LA INVESTIGACION                                                                                                                                                                                                       | CONSIDERACIONES ADICIONALES |
| <ul style="list-style-type: none"> <li>○ Triviales</li> <li>○ <b>Pequeños</b></li> <li>○ Moderados</li> <li>○ Grandes</li> <li>○ Varían</li> <li>○ No se sabe</li> </ul> | No existe ningún efecto indeseable, sin embargo, la limitante de la gran subjetividad del paciente en el BASDAI, refuerza la propuesta del uso simultaneo de ASDAS para una mejor toma de decisiones por parte del médico tratante. |                             |

| Certeza en la Evidencia                                                                                                                                                                                                                                                                          |                                                                                                                                                                                                                                                                                                                                                                                                                                                                                                                                                                                                                                                                                                                                                                                                                                                                                                                                                                                                                                                                                                                                                    |                                                                                                                                                                                                                                                                                                                                                                                                                                                            |
|--------------------------------------------------------------------------------------------------------------------------------------------------------------------------------------------------------------------------------------------------------------------------------------------------|----------------------------------------------------------------------------------------------------------------------------------------------------------------------------------------------------------------------------------------------------------------------------------------------------------------------------------------------------------------------------------------------------------------------------------------------------------------------------------------------------------------------------------------------------------------------------------------------------------------------------------------------------------------------------------------------------------------------------------------------------------------------------------------------------------------------------------------------------------------------------------------------------------------------------------------------------------------------------------------------------------------------------------------------------------------------------------------------------------------------------------------------------|------------------------------------------------------------------------------------------------------------------------------------------------------------------------------------------------------------------------------------------------------------------------------------------------------------------------------------------------------------------------------------------------------------------------------------------------------------|
| ¿Cuál es la certeza en la evidencia global sobre los efectos de la opción a recomendar?                                                                                                                                                                                                          |                                                                                                                                                                                                                                                                                                                                                                                                                                                                                                                                                                                                                                                                                                                                                                                                                                                                                                                                                                                                                                                                                                                                                    |                                                                                                                                                                                                                                                                                                                                                                                                                                                            |
| JUICIO                                                                                                                                                                                                                                                                                           | EVIDENCIA DE LA INVESTIGACION                                                                                                                                                                                                                                                                                                                                                                                                                                                                                                                                                                                                                                                                                                                                                                                                                                                                                                                                                                                                                                                                                                                      | CONSIDERACIONES ADICIONALES                                                                                                                                                                                                                                                                                                                                                                                                                                |
| <ul style="list-style-type: none"> <li>○ Muy baja</li> <li>○ Baja</li> <li>○ Moderada</li> <li>○ Alta</li> <li>○ No se identificaron estudios</li> </ul>                                                                                                                                         | Es claro el beneficio y la inocuidad de su uso.                                                                                                                                                                                                                                                                                                                                                                                                                                                                                                                                                                                                                                                                                                                                                                                                                                                                                                                                                                                                                                                                                                    | En los diversos estudios que intentan mostrar la correlación entre las diferentes medidas, se utiliza diversos métodos estadísticos, lo que a mi juicio hace perder un poco la correlación que intenta hacerse entre las dos mediciones de clinimetría más usadas.                                                                                                                                                                                         |
| Valores de los pacientes                                                                                                                                                                                                                                                                         |                                                                                                                                                                                                                                                                                                                                                                                                                                                                                                                                                                                                                                                                                                                                                                                                                                                                                                                                                                                                                                                                                                                                                    |                                                                                                                                                                                                                                                                                                                                                                                                                                                            |
| ¿Hay variación o poca certeza sobre cómo valoran las personas/los pacientes los desenlaces principales?                                                                                                                                                                                          |                                                                                                                                                                                                                                                                                                                                                                                                                                                                                                                                                                                                                                                                                                                                                                                                                                                                                                                                                                                                                                                                                                                                                    |                                                                                                                                                                                                                                                                                                                                                                                                                                                            |
| JUICIO                                                                                                                                                                                                                                                                                           | EVIDENCIA DE LA INVESTIGACION                                                                                                                                                                                                                                                                                                                                                                                                                                                                                                                                                                                                                                                                                                                                                                                                                                                                                                                                                                                                                                                                                                                      | CONSIDERACIONES ADICIONALES                                                                                                                                                                                                                                                                                                                                                                                                                                |
| <ul style="list-style-type: none"> <li>○ Variabilidad o incertidumbre importante</li> <li>○ Posiblemente hay variabilidad o incertidumbre importante</li> <li>○ Posiblemente No hay variabilidad o incertidumbre importante</li> <li>○ No hay variabilidad o incertidumbre importante</li> </ul> | Dougados y cols (12) evaluaron la relación entre la actividad de la enfermedad y los desenlaces reportados por pacientes (PROs) en pacientes con espondiloartritis axial no radiográfica (EspAax-nr), para lo cual se realizó un análisis pos- Hoc EMBARK en el cual (13) en el cual los PROs fueron agrupados de acuerdo a los estadios de actividad de la enfermedad y pacientes que alcanzaron una mejoría del 50% en el BASDAI. Altos índices de actividad ASDAS a las 104 semanas se asociaron con menor mejoría a largo plazo en los PROs: Dolor de espalda evaluado con escala análoga visual en cm IC 95% -4.58 (-4.95 a -4.21), IC 95% - 3.86 (- 4.28, - 3.43), IC 95% -2.15 (-2.68, -1.61), y IC 95% 1.30 (-0.51, 3.12) para inactivo, baja, alta y muy alta actividad de la enfermedad evaluada con ASDAS; los sujetos que no alcanzaron una respuesta del 50% en el BASDAI o no respondedores tuvieron menor mejoría en los PROs comparado con los respondedores ( dolor de espalda - 1.61 (- 2.05, - 1.18) vs. -4.43 (- 4.69, - 4.18); MFI índice de fatiga general - 0.01 (- 1.12, 1.09) vs. -4.30 (- 4.98, - 3.62); all p < 0.001). | Algunos consideran los análisis poc hoc una maniobra buscando establecer los resultados propuestos en la hipótesis inicial de trabajo. (derivando en el llamado error tipo i). De otra parte, es claro que en estas patologías también debemos establecer “una ventana de oportunidad” que se traduce en menos morbilidad en pacientes con enfermedad persistentemente activa, donde los indicadores de clinimetría serán claves para hacer el seguimiento |



|                                                                                                                                                                                                                                                                                                               |                                                                                                                            |                                                               |
|---------------------------------------------------------------------------------------------------------------------------------------------------------------------------------------------------------------------------------------------------------------------------------------------------------------|----------------------------------------------------------------------------------------------------------------------------|---------------------------------------------------------------|
|                                                                                                                                                                                                                                                                                                               |                                                                                                                            | clínico aun entre diferentes observadores (médicos tratantes) |
| <b>Balance de los efectos</b><br>¿El balance entre los efectos deseables e indeseables favorece la opción o el comparador?                                                                                                                                                                                    |                                                                                                                            |                                                               |
| <b>JUICIO</b>                                                                                                                                                                                                                                                                                                 | <b>EVIDENCIA DE LA INVESTIGACION</b>                                                                                       | <b>CONSIDERACIONES ADICIONALES</b>                            |
| <ul style="list-style-type: none"><li>○ Favorece al comparador</li><li>○ Probablemente favorece al comparador</li><li>○ No favorece al comparador ni a la opción en evaluación</li><li>○ Probablemente favorece a la opción</li><li>○ Favorece la intervención</li><li>○ Varia</li><li>○ No se sabe</li></ul> | Los estudios presentados presentan claramente los beneficios de la acción propuesta (utilidad del uso de basdai y asdas) , |                                                               |

| Recursos requeridos                                                                                                                                                                                                                                     |                                                                                                                                                                                                                                                                                                                                                                                                                                                                                       |                                                                                                                                                                                                                  |
|---------------------------------------------------------------------------------------------------------------------------------------------------------------------------------------------------------------------------------------------------------|---------------------------------------------------------------------------------------------------------------------------------------------------------------------------------------------------------------------------------------------------------------------------------------------------------------------------------------------------------------------------------------------------------------------------------------------------------------------------------------|------------------------------------------------------------------------------------------------------------------------------------------------------------------------------------------------------------------|
| Qué tan grande es el requerimiento de recursos (costos)?                                                                                                                                                                                                |                                                                                                                                                                                                                                                                                                                                                                                                                                                                                       |                                                                                                                                                                                                                  |
| JUICIO                                                                                                                                                                                                                                                  | EVIDENCIA DE LA INVESTIGACION                                                                                                                                                                                                                                                                                                                                                                                                                                                         | CONSIDERACIONES ADICIONALES                                                                                                                                                                                      |
| <ul style="list-style-type: none"> <li>○ Grandes costos</li> <li>○ Costos moderados</li> <li>○ no significantes</li> <li>○ costos ni ahorros</li> <li>○ Moderados ahorros</li> <li>○ Grandes ahorros</li> <li>○ Varían</li> <li>○ No se sabe</li> </ul> | <p>Zhu y cols determinaron que el promedio anual de costos fue de 9120 dólares americanos, de los cuales los costos indirectos representaron el 62%, dentro de los determinantes del costo se documentó que el BASDAI influenciaba los costos directos, pero no se correlacionaba con los costos (análisis de regresión lineal Coeficiente 0.05 por unidad de BASDAI (-0.1, 0.2) p:0.5) mientras que el deterioro funcional representaba el principal determinante de los costos.</p> | <p>Claramente El Uso De Estas Herramientas No Representa Ningún Costo Significativo Y Con La Posibilidad De Realizar Una Pcr O Una Vsg Prácticamente En Cualquier Nivel De Atención, Clave En Nuestro Medio.</p> |

| Equidad                                                                                                                                                                                                                                                  |                               |                             |
|----------------------------------------------------------------------------------------------------------------------------------------------------------------------------------------------------------------------------------------------------------|-------------------------------|-----------------------------|
| ¿La implementación de la opción, tendrá impacto en la equidad?                                                                                                                                                                                           |                               |                             |
| JUICIO                                                                                                                                                                                                                                                   | EVIDENCIA DE LA INVESTIGACION | CONSIDERACIONES ADICIONALES |
| <ul style="list-style-type: none"> <li>○ Reduce</li> <li>○ Probablemente se reduce la equidad</li> <li>○ Probablemente no impacta la equidad</li> <li>○ Probablemente incrementa</li> <li>○ Incrementa</li> <li>○ Varía</li> <li>○ No se sabe</li> </ul> |                               |                             |

| Aceptabilidad                                                                                                                                                       |                                                                                                                                                                                                                                                                                                                                                                                                                                                                                                                                                                                                                                                                                                                                                                                                                                                                                                                                                                                                                                                                                                                                                                                                                                                                                     |                                                                                                                                                                                                                                                         |
|---------------------------------------------------------------------------------------------------------------------------------------------------------------------|-------------------------------------------------------------------------------------------------------------------------------------------------------------------------------------------------------------------------------------------------------------------------------------------------------------------------------------------------------------------------------------------------------------------------------------------------------------------------------------------------------------------------------------------------------------------------------------------------------------------------------------------------------------------------------------------------------------------------------------------------------------------------------------------------------------------------------------------------------------------------------------------------------------------------------------------------------------------------------------------------------------------------------------------------------------------------------------------------------------------------------------------------------------------------------------------------------------------------------------------------------------------------------------|---------------------------------------------------------------------------------------------------------------------------------------------------------------------------------------------------------------------------------------------------------|
| ¿Es la opción aceptada por los diferentes actores involucrados en su implementación?                                                                                |                                                                                                                                                                                                                                                                                                                                                                                                                                                                                                                                                                                                                                                                                                                                                                                                                                                                                                                                                                                                                                                                                                                                                                                                                                                                                     |                                                                                                                                                                                                                                                         |
| JUICIO                                                                                                                                                              | EVIDENCIA DE LA INVESTIGACION                                                                                                                                                                                                                                                                                                                                                                                                                                                                                                                                                                                                                                                                                                                                                                                                                                                                                                                                                                                                                                                                                                                                                                                                                                                       | CONSIDERACIONES ADICIONALES                                                                                                                                                                                                                             |
| <ul style="list-style-type: none"> <li>○ No</li> <li>○ Probablemente no</li> <li>● Probablemente si</li> <li>○ Si</li> <li>○ Varía</li> <li>○ No se sabe</li> </ul> | <p>La actualización de las recomendaciones de la asociación canadiense de reumatología publicada en 2014 (16) la cual empleo como metodología para la graduación de recomendaciones la estrategia SIGN y consenso de expertos considero que el BASDAI es una medición de desenlace valida y confiable, adicionalmente consideran que el BASDAI es un componente mandatorio para el inicio de tratamiento biológico. Esta recomendación se generó por un consenso de expertos.</p> <p>La actualización de las recomendaciones del Task force para el tratamiento de la espondiloartritis y la espondiloartritis periférica publicada en 2017 (17) la cual empleo una metodología de revisión de la literatura y consenso para la generación de recomendaciones considero la medición de ASDAS de formar preferencial en Espondiloartritis axial, la graduación de las recomendaciones se realizó por la clasificación de Oxford Evidence-Based Medicine con un nivel de acuerdo de 7.9 (SD 2.5, en escala de 0-10).</p> <p>La guía NICE (18) en sus recomendaciones de manejo farmacológico, considera que un paciente ha tenido respuesta farmacológica posterior a 12 semanas de tratamiento si hay una reducción en el puntaje de BASDAI en un 50% del valor pre tratamiento.</p> | De acuerdo, sin embargo, el asdas podría dar una mayor fortaleza a la medición al involucrar variables objetivas de laboratorio.                                                                                                                        |
| Factibilidad                                                                                                                                                        |                                                                                                                                                                                                                                                                                                                                                                                                                                                                                                                                                                                                                                                                                                                                                                                                                                                                                                                                                                                                                                                                                                                                                                                                                                                                                     |                                                                                                                                                                                                                                                         |
| ¿Es la opción factible de IMPLEMENTAR?                                                                                                                              |                                                                                                                                                                                                                                                                                                                                                                                                                                                                                                                                                                                                                                                                                                                                                                                                                                                                                                                                                                                                                                                                                                                                                                                                                                                                                     |                                                                                                                                                                                                                                                         |
| JUICIO                                                                                                                                                              | EVIDENCIA DE LA INVESTIGACION                                                                                                                                                                                                                                                                                                                                                                                                                                                                                                                                                                                                                                                                                                                                                                                                                                                                                                                                                                                                                                                                                                                                                                                                                                                       | CONSIDERACIONES ADICIONALES                                                                                                                                                                                                                             |
| <ul style="list-style-type: none"> <li>No</li> <li>○ Probablemente no</li> <li>○ Probablemente si</li> <li>○ Si</li> <li>○ Varía</li> <li>● No se sabe</li> </ul>   | No hay estudios que evalúen factibilidad. Para definir con el panel                                                                                                                                                                                                                                                                                                                                                                                                                                                                                                                                                                                                                                                                                                                                                                                                                                                                                                                                                                                                                                                                                                                                                                                                                 | Claramente implantable. No tiene costos para el sistema significativos. Existe un documento en español validado que lo hace universal. (ariza r, Hernández-cruz b, navarro-sarabia f. La versión española del basdai es fiable y se correlaciona con la |

|  |  |                                                                                                                        |
|--|--|------------------------------------------------------------------------------------------------------------------------|
|  |  | actividad de la enfermedad en<br>pacientes con espondilitis<br><br>Anquilosante. Rev esp reumatol. 2004;<br>31:372-8.) |
|--|--|------------------------------------------------------------------------------------------------------------------------|

## Resumen de Juicios

|                         | JUICIOS                                 |                                                      |                                                          |                                            |                            |        |                        |
|-------------------------|-----------------------------------------|------------------------------------------------------|----------------------------------------------------------|--------------------------------------------|----------------------------|--------|------------------------|
| PROBLEMA                | No                                      | Probablemente No                                     | Probablemente si                                         | Si                                         |                            | Varían | No se sabe             |
| EFFECTOS DESEABLES      | Triviales                               | Pequeños                                             | Moderados                                                | Grandes                                    |                            | Varían | No se sabe             |
| EFFECTOS INDESEABLES    | Grandes                                 | Moderados                                            | Pequeños                                                 | Triviales                                  |                            | Varían | No se sabe             |
| CERTEZA EN LA EVIDENCIA | Muy baja                                | Baja                                                 | Moderada                                                 | Alta                                       |                            |        | No incluyeron estudios |
| VALORES DE PACIENTES    | Importante incertidumbre o variabilidad | Posiblemente importante incertidumbre o variabilidad | Probablemente no importante incertidumbre o variabilidad | No importante incertidumbre o variabilidad |                            |        |                        |
| BALANCE DE LOS EFECTOS  | Favorece al comparador                  | Probablemente favorece al comparador                 | No favorece ni a la intervención ni al comparador        | Probablemente favorece a la intervención   | Favorece a la intervención | Varían | No se sabe             |
| RECURSOS REQUERIDOS     | Grandes costos                          | Costos Moderados                                     | Costos y ahorros insignificantes                         | Moderados ahorros                          | Grandes Ahorros            | Varían | No se sabe             |
| EQUIDAD                 | Reducida                                | Probablemente reducida                               | Probablemente no impactada                               | Probablemente incrementada                 | Incrementada               | Varían | No se sabe             |
| ACEPTABILIDAD           | No                                      | Probablemente No                                     | Probablemente Si                                         | Si                                         |                            | Varían | No se sabe             |
| FACTIBILIDAD            | No                                      | Probablemente No                                     | Probablemente Si                                         | Si                                         |                            | Varían | No se sabe             |

## Tipo de Recomendación

|                                                      |                                                           |                                                                                    |                                                         |                                                    |
|------------------------------------------------------|-----------------------------------------------------------|------------------------------------------------------------------------------------|---------------------------------------------------------|----------------------------------------------------|
| Recomendación fuerte en contra de la opción<br><br>○ | Recomendación condicional en contra de la opción<br><br>○ | Recomendación condicional a favor de cualquiera la opción o su comparador<br><br>○ | Recomendación condicional a favor de la opción<br><br>○ | Recomendación fuerte a favor de la opción<br><br>○ |
|------------------------------------------------------|-----------------------------------------------------------|------------------------------------------------------------------------------------|---------------------------------------------------------|----------------------------------------------------|

## Conclusiones

### Recomendación

En pacientes con espondiloartritis axial se sugiere el uso de las escalas ASDAS o BASDAI para la evaluación de la actividad de la enfermedad  
Recomendación condicional a favor. Certeza de la evidencia alta

### Punto de Buena Práctica

El panel sugiere usar preferiblemente el ASDAS por que permite una mejor estratificación de la actividad de la enfermedad

### Justificación

Se recomienda de forma condicional a favor de la evaluación de la actividad con BASDAI y ASDAS dado que en los estudios mostraron buena consistencia interna y confiabilidad, para estos parámetros mejor el BASDAI que el ASDAS, tanto BASDAI como ASDAS mostraron una buena habilidad de discriminación y sensibilidad al cambio.

### Consideraciones por subgrupos

Debe ser fundamental su uso, especialmente en pacientes de reciente diagnóstico y mientras se logra la remisión clínica.

### Consideraciones de implementación

Es muy importante la educación del paciente en la elaboración de los formularios de autoevaluación.

### Monitoreo y evaluación de cumplimiento

Se sugiere el seguimiento de estas variables 3 veces por año

### Prioridades de investigación futura

Ninguna

## Votaciones de las recomendaciones para la GPC de EspAax:

| Número de la pregunta | Texto de la pregunta                                                                                                                                                                                                                                                                                                                                   | # total de votantes | Manifestación de conflictos de interés | Votos a favor de la recomendación | Votos en contra de la recomendación | Se abstienen del votar |
|-----------------------|--------------------------------------------------------------------------------------------------------------------------------------------------------------------------------------------------------------------------------------------------------------------------------------------------------------------------------------------------------|---------------------|----------------------------------------|-----------------------------------|-------------------------------------|------------------------|
| Pregunta # 1          | ¿En la detección de pacientes adultos con Espondiloartritis Axial y dolor lumbar, cuál de las escalas de tamizaje (1- Algoritmo de Berlín 2- criterios de ASAS de dolor lumbar inflamatorio- "Assessment of Spondyloarthritis international Society 3- criterios de Calín) se debe usar, por sus características operativas y rendimiento diagnóstico? | 12                  | 0                                      | 11                                | 1                                   |                        |
| Pregunta # 2          | ¿Para el diagnóstico de Espondiloartritis axial en pacientes adultos, se debe realizar Resonancia Magnética Nuclear de articulaciones sacroilíacas en vez de Rayos X de sacroilíacas, por sus características operativas y rendimiento diagnóstico?                                                                                                    | 12                  | 0                                      | 12                                |                                     |                        |



| Número de la pregunta | Texto de la pregunta                                                                                                                                                                                                                                                                                                        | # total de votantes | Manifestación de conflictos de interés | Votos a favor de la recomendación | Votos en contra de la recomendación | Se abstienen del votar |
|-----------------------|-----------------------------------------------------------------------------------------------------------------------------------------------------------------------------------------------------------------------------------------------------------------------------------------------------------------------------|---------------------|----------------------------------------|-----------------------------------|-------------------------------------|------------------------|
| Pregunta # 3          | ¿En pacientes adultos con Espondiloartritis Axial, se debe usar AINES (medicamentos antiinflamatorios no esteroideos) como la primera opción de tratamiento farmacológico por su efectividad (control enfermedad, remisión/baja actividad de síntomas, mejoría de escalas de funcionalidad) y seguridad (eventos adversos)? | 11                  | 0                                      | 10                                |                                     | 1                      |
| Pregunta # 4          | ¿En el tratamiento de pacientes adultos con Espondiloartritis Axial y manifestaciones axiales, se debe usar DMARDs convencionales, por su efectividad (control enfermedad, remisión/baja actividad de síntomas, mejoría de escalas de funcionalidad) y seguridad (eventos adversos)?                                        | 11                  | 0                                      | 11                                |                                     |                        |
| Pregunta # 5          | ¿ En el tratamiento de pacientes adultos con Espondiloartritis Axial se debe usar los analgésicos convencionales (acetaminofén, opioides) por su efectividad (mejoría de escalas de dolor y calidad de vida) y seguridad (eventos adversos)?                                                                                | 11                  | 0                                      | 11                                |                                     | 1                      |

| Número de la pregunta | Texto de la pregunta                                                                                                                                                                                                                                                                                                       | # total de votantes | Manifestación de conflictos de interés | Votos a favor de la recomendación | Votos en contra de la recomendación | Se abstienen del votar |
|-----------------------|----------------------------------------------------------------------------------------------------------------------------------------------------------------------------------------------------------------------------------------------------------------------------------------------------------------------------|---------------------|----------------------------------------|-----------------------------------|-------------------------------------|------------------------|
| Pregunta # 6          | ¿ En el tratamiento de pacientes adultos con Espondiloartritis Axial se debe usar los glucocorticoides (locales o sistémicos) por su efectividad (control enfermedad, remisión/baja actividad de síntomas, mejoría de escalas de funcionalidad y calidad de vida, progresión radiográfica) y seguridad (eventos adversos)? | 11                  | 0                                      | 11                                |                                     |                        |
| Pregunta # 7          | ¿En pacientes adultos con Espondiloartritis Axial activa que han fallado a AINES (medicamentos antiinflamatorios no esteroideos), se debe usar: 1- Anti TNFa ó 2-anti IL-17 ó 3. Anti 12-23 ó 4- inhibidores JAK, como segunda opción de tratamiento por su mayor efectividad y seguridad?                                 | 12                  | 0                                      | 12                                |                                     |                        |
| Pregunta # 8          | ¿En pacientes adultos con Espondiloartritis Axial que han fallado a primera línea de tratamiento biológico con un Anti TNFa, se debe usar otro medicamento/biológico (cuál) como siguiente opción de tratamiento por su efectividad y seguridad?                                                                           | 12                  | 0                                      | 12                                |                                     |                        |

| Número de la pregunta | Texto de la pregunta                                                                                                                                                                                                                                                                                                                                             | # total de votantes | Manifestación de conflictos de interés | Votos a favor de la recomendación | Votos en contra de la recomendación | Se abstienen del votar |
|-----------------------|------------------------------------------------------------------------------------------------------------------------------------------------------------------------------------------------------------------------------------------------------------------------------------------------------------------------------------------------------------------|---------------------|----------------------------------------|-----------------------------------|-------------------------------------|------------------------|
| Pregunta # 9          | ¿En pacientes adultos con Espondiloartritis Axial se debe usar terapias no farmacológicas como la terapia física y el ejercicio, para el control de la enfermedad, remisión de síntomas, baja actividad de la enfermedad, mejoría de escalas de funcionalidad y de la calidad de vida?                                                                           | 12                  | 0                                      | 12                                |                                     |                        |
| Pregunta # 10         | ¿En pacientes adultos con Espondiloartritis Axial se debe usar manejo no farmacológico con terapias no convencionales (1- Acupuntura 2- Pilates 3- Terapia Neural 4- Yoga 5- Reiki) para el control de la enfermedad, remisión de síntomas, baja actividad de la enfermedad, mejoría de escalas de funcionalidad y de la calidad de vida?                        | 11                  | 0                                      | 11                                |                                     |                        |
| Pregunta # 11         | ¿Para evaluar la actividad de la enfermedad en pacientes adultos con Espondiloartritis Axial, cuál de las escalas de clinimetría (1- ASDAS- "Ankylosing Spondylitis Disease Activity Score" 2- BASDAI - "Bath Ankylosing Spondylitis Disease Activity Index") se debe usar, de acuerdo con las características de la prueba (fiabilidad, sensibilidad al cambio, | 12                  | 0                                      | 12                                |                                     |                        |

| Número de la pregunta | Texto de la pregunta                             | # total de votantes | Manifestación de conflictos de interés | Votos a favor de la recomendación | Votos en contra de la recomendación | Se abstienen del votar |
|-----------------------|--------------------------------------------------|---------------------|----------------------------------------|-----------------------------------|-------------------------------------|------------------------|
|                       | capacidad discriminativa, consistencia interna)? |                     |                                        |                                   |                                     |                        |

## Referencias:

1. Cómo evaluar a los pacientes con espondilitis en la práctica clínica diaria [Internet]. [citado 17 de junio de 2020]. Disponible en: <https://www.reumatologiaclinica.org/es-pdf-S1699258X05727571>
2. Braun J, Pham T, Sieper J, Davis J, van der Linden S, Dougados M, et al. International ASAS consensus statement for the use of anti-tumour necrosis factor agents in patients with ankylosing spondylitis. *Ann Rheum Dis*. septiembre de 2003;62(9):817-24.
3. Calin A, Nakache JP, Gueguen A, Zeidler H, Mielants H, Dougados M. Defining disease activity in ankylosing spondylitis: is a combination of variables (Bath Ankylosing Spondylitis Disease Activity Index) an appropriate instrument? *Rheumatol Oxf Engl*. septiembre de 1999;38(9):878-82.
4. Kwan YH, Tan JJ, Phang JK, Fong W, Lim KK, Koh HL, et al. Validity and reliability of the Ankylosing Spondylitis Disease Activity Score with C-reactive protein (ASDAS-CRP) and Bath Ankylosing Spondylitis Disease Activity Index (BASDAI) in patients with axial spondyloarthritis (axSpA) in Singapore. *Int J Rheum Dis*. diciembre de 2019;22(12):2206-12.
5. Kilic E, Kilic G, Akgul O, Ozgocmen S. Discriminant validity of the Ankylosing Spondylitis Disease Activity Score (ASDAS) in patients with non-radiographic axial spondyloarthritis and ankylosing spondylitis: a cohort study. *Rheumatol Int*. junio de 2015;35(6):981-9.
6. Au YLE, Wong WSR, Mok MY, Chung HY, Chan E, Lau CS. Disease activity assessment in ankylosing spondylitis in a Chinese cohort: BASDAI or ASDAS? *Clin Rheumatol*. agosto de 2014;33(8):1127-34.
7. Sellas I Fernandez A, Juanola Roura X, Alonso Ruiz A, Rosas J, Medina Luezas J, Collantes Estevez E, et al. Clinical utility of the ASDAS index in comparison with BASDAI in patients with ankylosing spondylitis (Axis Study). *Rheumatol Int*. noviembre de 2017;37(11):1817-23.
8. Torre-Alonso JC, Queiro R, Comellas M, Lizán L, Blanch C. Patient-reported outcomes in European spondyloarthritis patients: a systematic review of the literature. *Patient Preference Adherence*. 2018;12:733-47.
9. Kucharz EJ, Kotulska A, Kopeć-Mędrek M, Widuchowska M. Opinion of patients with ankylosing spondylitis on risk factors impairing their quality of life. *Rheumatol Int*. noviembre de 2013;33(11):2899-901.
10. Ariza-Ariza R, Hernández-Cruz B, Navarro-Sarabia F. Physical function and health-related quality of life of Spanish patients with ankylosing spondylitis. *Arthritis Rheum*. 15 de agosto de 2003;49(4):483-7.

11. Ariza-Ariza R, Hernández-Cruz B, López-Antequera G, Navarro-Sarabia F. Variables related to utility in patients with ankylosing spondylitis. *Clin Rheumatol*. febrero de 2009;28(2):207-11.
12. Dougados M, van der Heijde D, Tsai W-C, Saaibi D, Marshall L, Jones H, et al. Relationship between disease activity status or clinical response and patient-reported outcomes in patients with non-radiographic axial spondyloarthritis: 104-week results from the randomized controlled EMBARK study. *Health Qual Life Outcomes*. 3 de enero de 2020;18(1):4.
13. Dougados M, van der Heijde D, Sieper J, Braun J, Maksymowych WP, Citera G, et al. Symptomatic efficacy of etanercept and its effects on objective signs of inflammation in early nonradiographic axial spondyloarthritis: a multicenter, randomized, double-blind, placebo-controlled trial. *Arthritis Rheumatol Hoboken NJ*. agosto de 2014;66(8):2091-102.
14. Zhu TY, Tam L-S, Lee VW-Y, Hwang WW, Li TK, Lee KK, et al. Costs and quality of life of patients with ankylosing spondylitis in Hong Kong. *Rheumatol Oxf Engl*. septiembre de 2008;47(9):1422-5.
15. Machado P, van der Heijde D. How to measure disease activity in axial spondyloarthritis? *Curr Opin Rheumatol*. julio de 2011;23(4):339-45.
16. Rohekar S, Chan J, Tse SML, Haroon N, Chandran V, Bessette L, et al. 2014 Update of the Canadian Rheumatology Association/spondyloarthritis research consortium of Canada treatment recommendations for the management of spondyloarthritis. Part I: principles of the management of spondyloarthritis in Canada. *J Rheumatol*. abril de 2015;42(4):654-64.
17. Smolen JS, Schöls M, Braun J, Dougados M, FitzGerald O, Gladman DD, et al. Treating axial spondyloarthritis and peripheral spondyloarthritis, especially psoriatic arthritis, to target: 2017 update of recommendations by an international task force. *Ann Rheum Dis*. 2018;77(1):3-17.
18. Recommendations | Spondyloarthritis in over 16s: diagnosis and management | Guidance | NICE [Internet]. [citado 13 de febrero de 2020]. Disponible en: <https://www.nice.org.uk/guidance/ng65/chapter/Recommendations#diagnosing-spondyloarthritis-in-specialist-care-settings>
